# Supplementary material
Source: publisher figshare collection journal article supplement (https://acs.figshare.com/ndownloader/files/3827320)
Supplement: Supplementary file 1 [file 3827320]

data_global
_audit_creation_date        "14-03-10"
_audit_creation_method CRYSTALS_ver_14.40

_oxford_structure_analysis_title  'JV7 in Pbca'
_chemical_name_systematic         ?
_chemical_melting_point           ?

_publ_contact_author_name         'Danielle Laurencin'
_publ_contact_author_address
;
 Institut Charles Gerhardt de Montpellier UMR 5253, 
 Place E Bataillon, CC1701,
 University Montpellier II,
 Montpellier, 34095, France.
;

_publ_requested_journal           ''
_publ_section_title
# Title of paper - generally just the systematic or trivial name
; 
Intercalation of benzoxaborolate anions in layered double hydroxides: toward hybrid formulations for benzoxaborole drugs
;

# The loop structure below should contain the names and addresses of all
# authors, in the required order of publication. Repeat as necessary.
loop_
 _publ_author_name
 'S. Sene' # Author 1
 'S. Begu'
 'C. Gervais'
 'G. Renaudin'
 'A. Mesbah'
 'M. E. Smith'
 'P. H. Mutin'
 'A. van der Lee'
 'J.-M. Nedelec'
 'C. Bonhomme'
 'D. Laurencin'

_publ_section_exptl_refinement
# Some potentially useful phrases are donated by Bill Clegg:
;


The H atoms were all located in a difference map, but those
attached to carbon atoms were repositioned geometrically.
The H atoms were refined with soft restraints on the
bond lengths and angles to regularise their geometry
(C---H in the range 0.93--0.98,
O---H = 0.82
\%A)
and
U~iso~(H) (in the range 1.2-1.5 times U~eq~ of the parent atom),
after which the positions were refined with riding constraints
(Cooper et al, 2010).

Cooper, R. I., Thompson, A. L. & Watkin, D. J. (2010). J. Appl. Cryst.
43, 1100-1107.

;

data_1

_exptl_special_details
;
 The crystal was
placed in the cold stream of an Oxford
Cryosystems open-flow nitrogen cryostat (Cosier &
Glazer, 1986) with a nominal stability of 0.1K.

Cosier, J. & Glazer, A.M., 1986. J. Appl. Cryst. 105-107.
;
_refine_special_details 
; 
? 
; 
#---------------------------------------------------------------
_cell_length_a                    8.2365(3)
_cell_length_b                    12.1468(5)
_cell_length_c                    24.7923(11)
_cell_angle_alpha                 90
_cell_angle_beta                  90
_cell_angle_gamma                 90
_cell_volume                      2480.39(18)
_cell_measurement_reflns_used   6413
_cell_measurement_theta_min     2.9753
_cell_measurement_theta_max     29.0129
_cell_oxdiff_length_a                  8.2356(3) 
_cell_oxdiff_length_b                  12.1467(4) 
_cell_oxdiff_length_c                  24.7953(11) 
_cell_oxdiff_angle_alpha               89.959(3) 
_cell_oxdiff_angle_beta                89.986(3) 
_cell_oxdiff_angle_gamma               90.000(3) 
_cell_oxdiff_volume                    2480.39(16) 
 
_symmetry_cell_setting            'orthorhombic' 
_symmetry_space_group_name_H-M    'P b c a ' 
_symmetry_space_group_name_Hall '-P 2ac 2ab'
loop_
 _symmetry_equiv_pos_as_xyz
 'x,y,z'
 '-x,-y,-z'
 'x,-y+1/2,z+1/2'
 '-x,y+1/2,-z+1/2'
 '-x+1/2,-y,z+1/2'
 'x+1/2,y,-z+1/2'
 'x+1/2,-y+1/2,-z'
 '-x+1/2,y+1/2,z'

loop_
_atom_type_symbol
_atom_type_scat_dispersion_real
_atom_type_scat_dispersion_imag
_atom_type_scat_Cromer_Mann_a1
_atom_type_scat_Cromer_Mann_b1
_atom_type_scat_Cromer_Mann_a2
_atom_type_scat_Cromer_Mann_b2
_atom_type_scat_Cromer_Mann_a3
_atom_type_scat_Cromer_Mann_b3
_atom_type_scat_Cromer_Mann_a4
_atom_type_scat_Cromer_Mann_b4
_atom_type_scat_Cromer_Mann_c
_atom_type_scat_source  
 C       0.0033   0.0016   2.3100  20.8439   1.0200  10.2075   1.5886   0.5687
   0.8650  51.6512   0.2156 'International Tables Vol C 4.2.6.8 and 6.1.1.4'
 H       0.0000   0.0000   0.4930  10.5109   0.3229  26.1257   0.1402   3.1424
   0.0408  57.7998   0.0030 'International Tables Vol C 4.2.6.8 and 6.1.1.4'
 O       0.0106   0.0060   3.0485  13.2771   2.2868   5.7011   1.5463   0.3239
   0.8670  32.9089   0.2508 'International Tables Vol C 4.2.6.8 and 6.1.1.4'
 B       0.0013   0.0007   2.0545  23.2185   1.3326   1.0210   1.0979  60.3498
   0.7068   0.1403  -0.1932 'International Tables Vol C 4.2.6.8 and 6.1.1.4'
 Mg      0.0486   0.0363   5.4204   2.8275   2.1735  79.2611   1.2269   0.3808
   2.3073   7.1937   0.8584 'International Tables Vol C 4.2.6.8 and 6.1.1.4'
 
 
_cell_formula_units_Z              4

_chemical_formula_sum    'C14 H36 B2 Mg O16'
_chemical_formula_moiety 'H12 Mg O6, 2(C7 H8 B O3), 4(H2 O)'
_chemical_compound_source                ?
_chemical_formula_weight           506.36
 
 
_cell_measurement_temperature          175
 
_exptl_crystal_description        'prism' 
_exptl_crystal_colour             'colourless' 
_exptl_crystal_size_min           0.150 
_exptl_crystal_size_mid           0.220
_exptl_crystal_size_max           0.300 
_exptl_absorpt_correction_T_min                   0.95667
_exptl_absorpt_correction_T_max                   1.00000
_exptl_absorpt_correction_type            'multi-scan'
_exptl_absorpt_process_details
;
CrysAlisPro, Oxford Diffraction Ltd.,
Version 1.171.34.40 (release 27-08-2010 CrysAlis171 .NET)
(compiled Aug 27 2010,11:50:40)
Empirical absorption correction using spherical harmonics,
 implemented in SCALE3 ABSPACK scaling algorithm.
;
 
_exptl_crystal_density_diffrn     1.356 
_exptl_crystal_density_meas       ? 
_exptl_crystal_density_method     'not measured' 
# Non-dispersive F(000): 
_exptl_crystal_F_000              1080 
_exptl_absorpt_coefficient_mu     0.142 
_diffrn_radiation_type 'Mo K\a'
_diffrn_radiation_source 'Enhance (Mo) X-ray Source'
_diffrn_radiation_monochromator 'graphite'
_diffrn_measurement_device_type 'Xcalibur, Sapphire2, large Be window'
_diffrn_detector_area_resol_mean 8.4205
 
_diffrn_measurement_device        'Serial' 
_diffrn_radiation_wavelength           0.71073
#montpellier_reflns_maxres is minimum d (highest resolution)
#where <I/sigI> <= 2.0
#(Z. Dauter, Acta Cryst. D55, 1703-1717, 1999)
_montpellier_reflns_maxres 0.73
_montpellier_reflns_completeness_maxres    90.14
_montpellier_reflns_redundancy_maxres     4.87

#montpellier_diffrn_reflns_class_completeness_shell is completeness in shell
#montpellier_diffrn_class_reflns_cumul_completeness is cumulative
#completeness to resolution of shell
#Note: completeness percentage takes into account the fact whether
#group is centrosymmetric or not
loop_
_montpellier_diffrn_reflns_class_number
_montpellier_diffrn_reflns_class_d_res_high
_montpellier_diffrn_reflns_class_d_res_low
_montpellier_diffrn_reflns_class_redundancy
_montpellier_diffrn_reflns_class_av_I/uI
_diffrn_reflns_class_av_R_eq
_montpellier_diffrn_reflns_class_completeness_shell
_montpellier_diffrn_reflns_class_cumul_completeness
  0    100.0     1.70      7.0   118.71    0.016     97.4    97.43
  1     1.70     1.33      6.5    53.89    0.022    100.0    98.70
  2     1.33     1.15      6.1    42.71    0.028    100.0    99.13
  3     1.15     1.04      5.6    27.86    0.037    100.0    99.34
  4     1.04     0.96      5.1    20.93    0.045    100.0    99.47
  5     0.96     0.91      4.7    15.67    0.059    100.0    99.56
  6     0.91     0.86      4.4    13.43    0.076    100.0    99.62
  7     0.86     0.82      4.1    11.50    0.091    100.0    99.67
  8     0.82     0.79      3.5     8.94    0.107     98.3    99.51
  9     0.79     0.73      1.7     5.62    0.111     48.9    90.14
#End reflection statistics
_computing_data_collection
;
CrysAlisPro, Oxford Diffraction Ltd.,
Version 1.171.34.40 (release 27-08-2010 CrysAlis171 .NET)
(compiled Aug 27 2010,11:50:40)
;
_computing_cell_refinement
;
CrysAlisPro, Oxford Diffraction Ltd.,
Version 1.171.34.40 (release 27-08-2010 CrysAlis171 .NET)
(compiled Aug 27 2010,11:50:40)
;
_computing_data_reduction
;
CrysAlisPro, Oxford Diffraction Ltd.,
Version 1.171.34.40 (release 27-08-2010 CrysAlis171 .NET)
(compiled Aug 27 2010,11:50:40)
;
_computing_structure_solution     'Superflip (Palatinus & Chapuis, 2007)' 
_computing_structure_refinement   'CRYSTALS (Betteridge et al., 2003)' 
_computing_publication_material   'CRYSTALS (Betteridge et al., 2003)' 
_computing_molecular_graphics     'CAMERON (Watkin et al., 1996)' 
_diffrn_orient_matrix_UB_11       0.0751905000
_diffrn_orient_matrix_UB_12       0.0281058000
_diffrn_orient_matrix_UB_13       0.0022303000
_diffrn_orient_matrix_UB_21      -0.0038245000
_diffrn_orient_matrix_UB_22      -0.0047823000
_diffrn_orient_matrix_UB_23       0.0284838000
_diffrn_orient_matrix_UB_31       0.0418273000
_diffrn_orient_matrix_UB_32      -0.0509620000
_diffrn_orient_matrix_UB_33      -0.0014194000
_diffrn_measurement_details
;
#__ type_ start__ end____ width___ exp.time_
  1 omega   75.00  109.00   1.0000   77.2300
omega____ theta____ kappa____ phi______ frames
    -       19.4101  142.0000  122.0000 34

#__ type_ start__ end____ width___ exp.time_
  2 omega  -12.00   81.00   1.0000   77.2300
omega____ theta____ kappa____ phi______ frames
    -       19.4101   38.0000 -112.0000 93

#__ type_ start__ end____ width___ exp.time_
  3 omega   50.00  116.00   1.0000   77.2300
omega____ theta____ kappa____ phi______ frames
    -       19.4101   77.0000   90.0000 66

#__ type_ start__ end____ width___ exp.time_
  4 omega  -19.00   12.00   1.0000   77.2300
omega____ theta____ kappa____ phi______ frames
    -       19.4101   77.0000   30.0000 31

#__ type_ start__ end____ width___ exp.time_
  5 omega  -59.00   67.00   1.0000   77.2300
omega____ theta____ kappa____ phi______ frames
    -      -22.5351   38.0000 -180.0000 126

;
_diffrn_measurement_method '\w scans'
 
_diffrn_ambient_temperature        175
_diffrn_reflns_number             15245 
_reflns_number_total              2991 
_diffrn_reflns_av_R_equivalents   0.025 
_diffrn_reflns_av_sigmaI/netI 0.0667
# Number of reflections without Friedels Law is 0
# Number of reflections with Friedels Law is 2991 
# Theoretical number of reflections is about 6643 
 
 
_diffrn_reflns_theta_min          3.099 
_diffrn_reflns_theta_max          29.077 
_diffrn_measured_fraction_theta_max 0.900 
 
_diffrn_reflns_theta_full         25.006 
_diffrn_measured_fraction_theta_full 0.984 
 

_diffrn_reflns_limit_h_min        -11 
_diffrn_reflns_limit_h_max        10 
_diffrn_reflns_limit_k_min        -16 
_diffrn_reflns_limit_k_max        16 
_diffrn_reflns_limit_l_min        -33 
_diffrn_reflns_limit_l_max        33 
_reflns_limit_h_min               0 
_reflns_limit_h_max               11 
_reflns_limit_k_min               0
_reflns_limit_k_max               16 
_reflns_limit_l_min               0 
_reflns_limit_l_max               33 
 
_oxford_diffrn_Wilson_B_factor    0.00 
_oxford_diffrn_Wilson_scale       0.00 
 
_atom_sites_solution_primary      iterative  #heavy,direct,difmap,geom
# _atom_sites_solution_secondary  difmap
_atom_sites_solution_hydrogens    difmap
 
_refine_diff_density_min          -0.29 
_refine_diff_density_max          0.47 

 
# The current dictionary definitions do not cover the 
# situation where the reflections used for refinement were 
# selected by a user-defined sigma threshold 
 
 
# The values actually used during refinement
_oxford_reflns_threshold_expression_ref     I>-3.0\s(I)
_refine_ls_number_reflns          2991 
_refine_ls_number_restraints      47 
_refine_ls_number_parameters      205 
_oxford_refine_ls_R_factor_ref    0.0481 
_refine_ls_wR_factor_ref          0.0874 
_refine_ls_goodness_of_fit_ref    1.0070 
_refine_ls_shift/su_max           0.0033233 
_refine_ls_shift/su_mean          0.0000988 
 
 
# The values computed with all filters except I/sigma
_oxford_reflns_number_all         2991 
_refine_ls_R_factor_all           0.0481 
_refine_ls_wR_factor_all          0.0874 
 
# The values computed with a 2 sigma cutoff - a la SHELX 
_reflns_threshold_expression      I>2.0\s(I)
_reflns_number_gt                 2493 
_refine_ls_R_factor_gt            0.0362 
_refine_ls_wR_factor_gt           0.0821
 
# choose from: rm (reference molecule of known chirality), 
# ad (anomolous dispersion - Flack), rmad (rm and ad), 
# syn (from synthesis), unk (unknown) or . (not applicable). 
_chemical_absolute_configuration  '.' 
 
 
_refine_ls_structure_factor_coef  Fsqd 
_refine_ls_matrix_type            full
_refine_ls_hydrogen_treatment     refxyz         #undef, noref, refall,
                                                 # refxyz, refU, constr or mixed
_refine_ls_weighting_scheme       calc 
_refine_ls_weighting_details 
;
 Method= Modified Sheldrick 
 w=1/[\s^2^(F^2^) + ( 0.04P)^2^ + 1.33P] 
 ,where P=(max(Fo^2^,0) + 2Fc^2^)/3 
;
# Insert your own references if required - in alphabetical order 
_publ_section_references 
;
User-defined data collection reference 
 
User defined cell refinement 
 
Betteridge, P.W., Carruthers, J.R., Cooper, R.I., 
Prout, K. & Watkin, D.J. (2003). J. Appl. Cryst. 36, 1487. 
 
Otwinowski, Z. & Minor, W. (1997). Methods in Enzymology, Vol. 276, 
edited by C. W. Carter Jr & R. M. Sweet, pp. 307--326. 
New York: Academic Press. 
 
Oxford Diffraction, (2010). CrysAlisPro.
 
Palatinus, L. & Chapuis, G. (2007). J. Appl. Cryst. 40, 786-790. 
 
Watkin, D.J., Prout, C.K. & Pearce, L.J. (1996). CAMERON, Chemical 
Crystallography Laboratory, Oxford, UK. 
;

# Uequiv = arithmetic mean of Ui i.e. Ueqiv = (U1+U2+U3)/3

# Replace last . with number of unfound hydrogen atoms attached to an atom.

# ..._refinement_flags_... 
# . no refinement constraints           S special position constraint on site
# G rigid group refinement of site      R riding atom
# D distance or angle restraint on site T thermal displacement constraints
# U Uiso or Uij restraint (rigid bond)  P partial occupancy constraint


loop_
_atom_site_label
_atom_site_type_symbol
_atom_site_fract_x
_atom_site_fract_y
_atom_site_fract_z
_atom_site_U_iso_or_equiv
_atom_site_occupancy
_atom_site_adp_type
_atom_site_refinement_flags_posn
_atom_site_refinement_flags_adp
_atom_site_refinement_flags_occupancy
_atom_site_disorder_assembly
_atom_site_disorder_group
_atom_site_attached_hydrogens
Mg1 Mg 0.5000 0.5000 0.5000 0.0159 1.0000 Uani S . . . . . 
O2 O 0.36476(11) 0.35864(7) 0.49407(4) 0.0190 1.0000 Uani D . . . . . 
H21 H 0.396(2) 0.3030(12) 0.4785(7) 0.0304 1.0000 Uiso D . . . . . 
H22 H 0.318(2) 0.3365(14) 0.5210(6) 0.0304 1.0000 Uiso D . . . . . 
O3 O 0.34110(12) 0.55642(8) 0.55811(4) 0.0232 1.0000 Uani D . . . . . 
H31 H 0.327(2) 0.6222(12) 0.5642(7) 0.0370 1.0000 Uiso D . . . . . 
H32 H 0.276(2) 0.5226(14) 0.5763(7) 0.0362 1.0000 Uiso D . . . . . 
O4 O 0.35217(12) 0.56663(8) 0.43947(4) 0.0234 1.0000 Uani D . . . . . 
H41 H 0.2643(19) 0.5944(14) 0.4457(7) 0.0363 1.0000 Uiso D . . . . .
H42 H 0.394(2) 0.6035(14) 0.4147(7) 0.0353 1.0000 Uiso D . . . . . 
O5 O 0.20581(10) 0.27857(7) 0.57869(4) 0.0176 1.0000 Uani D . . . . . 
B6 B 0.05309(17) 0.33468(11) 0.59484(6) 0.0157 1.0000 Uani . . . . . . 
O7 O 0.09117(11) 0.45122(7) 0.61247(4) 0.0199 1.0000 Uani D . . . . . 
C8 C 0.0451(2) 0.47114(12) 0.66726(6) 0.0300 1.0000 Uani D . . . . . 
C9 C -0.03753(17) 0.36804(12) 0.68681(5) 0.0254 1.0000 Uani D . . . . . 
C10 C -0.03495(15) 0.28621(11) 0.64761(5) 0.0194 1.0000 Uani D . . . . . 
C11 C -0.10085(17) 0.18318(13) 0.65978(6) 0.0280 1.0000 Uani D . . . . . 
C12 C -0.17144(18) 0.16519(16) 0.71014(7) 0.0381 1.0000 Uani D . . . . .
C13 C -0.1761(2) 0.24889(17) 0.74814(7) 0.0433 1.0000 Uani D . . . . . 
C14 C -0.1080(2) 0.35029(16) 0.73730(6) 0.0399 1.0000 Uani D . . . . . 
H141 H -0.1073(13) 0.4087(12) 0.7626(6) 0.0485 1.0000 Uiso D . . . . . 
H131 H -0.2270(13) 0.2359(12) 0.7811(6) 0.0520 1.0000 Uiso D . . . . . 
H121 H -0.2152(13) 0.0948(12) 0.7179(6) 0.0464 1.0000 Uiso D . . . . . 
H111 H -0.0962(12) 0.1239(11) 0.6335(5) 0.0331 1.0000 Uiso D . . . . . 
H81 H -0.0279(18) 0.5336(12) 0.6693(6) 0.0367 1.0000 Uiso D . . . . . 
H82 H 0.1457(17) 0.4893(12) 0.6885(6) 0.0378 1.0000 Uiso D . . . . . 
O15 O -0.05288(11) 0.33573(7) 0.54704(4) 0.0176 1.0000 Uani D . . . . . 
H151 H -0.009(2) 0.3549(14) 0.5187(6) 0.0280 1.0000 Uiso D . . . . . 
H51 H 0.2721(19) 0.2822(14) 0.6022(6) 0.0280 1.0000 Uiso D . . . . . 
O16 O 0.06551(12) 0.38547(8) 0.44216(4) 0.0242 1.0000 Uani D . . . . . 
H161 H 0.1607(18) 0.3957(16) 0.4485(7) 0.0384 1.0000 Uiso D . . . . . 
H162 H 0.030(2) 0.4437(13) 0.4285(7) 0.0375 1.0000 Uiso D . . . . . 
O17 O 0.51121(13) 0.28067(9) 0.63089(4) 0.0276 1.0000 Uani D . . . . . 
H171 H 0.561(2) 0.2769(16) 0.6583(7) 0.0428 1.0000 Uiso D . . . . . 
H172 H 0.541(2) 0.2264(14) 0.6118(7) 0.0432 1.0000 Uiso D . . . . . 
loop_
_atom_site_aniso_label
_atom_site_aniso_U_11
_atom_site_aniso_U_22
_atom_site_aniso_U_33
_atom_site_aniso_U_23
_atom_site_aniso_U_13
_atom_site_aniso_U_12
Mg1 0.0129(3) 0.0136(3) 0.0211(3) 0.0007(2) 0.0020(2) 0.0000(2) 
O2 0.0200(4) 0.0149(4) 0.0222(5) -0.0002(4) 0.0064(4) -0.0012(4) 
O3 0.0218(5) 0.0161(4) 0.0315(6) -0.0018(4) 0.0108(4) -0.0014(4) 
O4 0.0181(4) 0.0244(5) 0.0276(5) 0.0076(4) 0.0024(4) 0.0038(4) 
O5 0.0146(4) 0.0185(4) 0.0197(5) -0.0003(4) 0.0001(4) 0.0015(3) 
B6 0.0141(6) 0.0150(6) 0.0181(7) 0.0002(5) 0.0002(5) 0.0000(5) 
O7 0.0224(4) 0.0172(4) 0.0201(5) -0.0035(4) 0.0017(4) -0.0009(4) 
C8 0.0456(9) 0.0247(7) 0.0196(7) -0.0049(6) -0.0001(7) 0.0081(7)
C9 0.0271(7) 0.0310(7) 0.0182(6) 0.0023(6) 0.0008(5) 0.0113(6) 
C10 0.0131(5) 0.0272(7) 0.0178(6) 0.0040(5) -0.0007(5) 0.0022(5) 
C11 0.0233(7) 0.0355(8) 0.0253(7) 0.0089(6) -0.0028(6) -0.0074(6) 
C12 0.0273(8) 0.0561(10) 0.0309(8) 0.0219(8) -0.0019(6) -0.0111(7) 
C13 0.0336(8) 0.0725(12) 0.0237(8) 0.0197(9) 0.0095(7) 0.0078(9) 
C14 0.0460(9) 0.0533(10) 0.0204(8) 0.0028(7) 0.0076(7) 0.0189(8) 
O15 0.0174(4) 0.0198(4) 0.0156(4) 0.0019(4) -0.0001(4) -0.0006(4) 
O16 0.0199(5) 0.0248(5) 0.0278(5) 0.0058(4) -0.0024(4) -0.0001(4) 
O17 0.0278(5) 0.0304(5) 0.0245(5) 0.0022(4) -0.0025(4) 0.0024(4)

_refine_ls_extinction_method 
    'None'
_oxford_refine_ls_scale 1.668(9) 
loop_
 _geom_bond_atom_site_label_1
 _geom_bond_site_symmetry_1
 _geom_bond_atom_site_label_2
 _geom_bond_site_symmetry_2
 _geom_bond_distance
 _geom_bond_publ_flag
Mg1 . O2 2_666 2.0520(9)    yes
Mg1 . O3 2_666 2.0635(10)    yes
Mg1 . O4 2_666 2.0951(10)    yes
Mg1 . O2 . 2.0520(9)    yes
Mg1 . O3 . 2.0635(10)    yes
Mg1 . O4 . 2.0951(10)    yes
O2 . H21 . 0.820(14)    no
O2 . H22 . 0.817(14)    no
O3 . H31 . 0.821(14)    no
O3 . H32 . 0.813(14)    no
O4 . H41 . 0.813(14)    no
O4 . H42 . 0.834(14)    no
O5 . B6 . 1.4856(16)    yes
O5 . H51 . 0.799(13)    no
B6 . O7 . 1.5144(16)    yes
B6 . C10 . 1.6076(18)    yes
B6 . O15 . 1.4718(16)    yes
O7 . C8 . 1.4310(17)    yes
C8 . C9 . 1.505(2)    yes
C8 . H81 . 0.969(14)    no
C8 . H82 . 1.006(14)    no
C9 . C10 . 1.3904(19)    yes
C9 . C14 . 1.397(2)    yes
C10 . C11 . 1.397(2)    yes
C11 . C12 . 1.395(2)    yes
C11 . H111 . 0.971(13)    no
C12 . C13 . 1.387(3)    yes
C12 . H121 . 0.948(14)    no
C13 . C14 . 1.380(3)    yes
C13 . H131 . 0.932(14)    no
C14 . H141 . 0.947(14)    no
O15 . H151 . 0.826(13)    no
O16 . H161 . 0.809(14)    no
O16 . H162 . 0.837(14)    no
O17 . H171 . 0.794(15)    no
O17 . H172 . 0.847(14)    no
loop_
 _geom_angle_atom_site_label_1
 _geom_angle_site_symmetry_1
 _geom_angle_atom_site_label_2
 _geom_angle_site_symmetry_2
 _geom_angle_atom_site_label_3
 _geom_angle_site_symmetry_3
 _geom_angle
 _geom_angle_publ_flag
O2 2_666 Mg1 . O3 2_666 89.06(4)    yes
O2 2_666 Mg1 . O4 2_666 87.50(4)    yes
O3 2_666 Mg1 . O4 2_666 90.18(4)    yes
O2 2_666 Mg1 . O2 . 179.994    yes
O3 2_666 Mg1 . O2 . 90.94(4)    yes
O4 2_666 Mg1 . O2 . 92.50(4)    yes
O2 2_666 Mg1 . O3 . 90.94(4)    yes
O3 2_666 Mg1 . O3 . 179.994    yes
O4 2_666 Mg1 . O3 . 89.82(4)    yes
O2 . Mg1 . O3 . 89.06(4)    yes
O2 2_666 Mg1 . O4 . 92.50(4)    yes
O3 2_666 Mg1 . O4 . 89.82(4)    yes
O4 2_666 Mg1 . O4 . 179.995    yes
O2 . Mg1 . O4 . 87.50(4)    yes
O3 . Mg1 . O4 . 90.18(4)    yes
Mg1 . O2 . H21 . 123.6(12)    no
Mg1 . O2 . H22 . 118.3(12)    no
H21 . O2 . H22 . 105.2(17)    no
Mg1 . O3 . H31 . 122.7(13)    no
Mg1 . O3 . H32 . 129.7(13)    no
H31 . O3 . H32 . 107.3(18)    no
Mg1 . O4 . H41 . 122.7(13)    no
Mg1 . O4 . H42 . 119.7(13)    no
H41 . O4 . H42 . 106.5(18)    no
B6 . O5 . H51 . 110.9(12)    no
O5 . B6 . O7 . 109.34(10)    yes
O5 . B6 . C10 . 115.67(10)    yes
O7 . B6 . C10 . 101.59(10)    yes
O5 . B6 . O15 . 106.81(10)    yes
O7 . B6 . O15 . 110.31(10)    yes
C10 . B6 . O15 . 113.01(10)    yes
B6 . O7 . C8 . 112.15(10)    yes
O7 . C8 . C9 . 106.56(11)    yes
O7 . C8 . H81 . 110.2(9)    no
C9 . C8 . H81 . 110.8(9)    no
O7 . C8 . H82 . 108.3(9)    no
C9 . C8 . H82 . 112.8(9)    no
H81 . C8 . H82 . 108.2(11)    no
C8 . C9 . C10 . 111.27(12)    yes
C8 . C9 . C14 . 127.23(14)    yes
C10 . C9 . C14 . 121.50(15)    yes
B6 . C10 . C9 . 108.30(11)    yes
B6 . C10 . C11 . 132.78(13)    yes
C9 . C10 . C11 . 118.91(13)    yes
C10 . C11 . C12 . 119.72(15)    yes
C10 . C11 . H111 . 120.3(8)    no
C12 . C11 . H111 . 120.0(8)    no
C11 . C12 . C13 . 120.33(16)    yes
C11 . C12 . H121 . 118.8(9)    no
C13 . C12 . H121 . 120.9(9)    no
C12 . C13 . C14 . 120.72(15)    yes
C12 . C13 . H131 . 118.9(9)    no
C14 . C13 . H131 . 120.3(9)    no
C9 . C14 . C13 . 118.77(16)    yes
C9 . C14 . H141 . 118.4(9)    no
C13 . C14 . H141 . 122.8(9)    no
B6 . O15 . H151 . 115.2(12)    no
H161 . O16 . H162 . 106.6(19)    no
H171 . O17 . H172 . 106.6(19)    no
loop_
 _geom_hbond_atom_site_label_D
 _geom_hbond_site_symmetry_D
 _geom_hbond_atom_site_label_H
 _geom_hbond_site_symmetry_H
 _geom_hbond_atom_site_label_A
 _geom_hbond_site_symmetry_A
 _geom_hbond_angle_DHA
 _geom_hbond_distance_DH
 _geom_hbond_distance_HA
 _geom_hbond_distance_DA
 _geom_hbond_publ_flag
O2 . H21 . O15 7_556 169.8(17) 0.820 1.848 2.660(2)    yes
O2 . H22 . O5 . 175.8(17) 0.817 1.842 2.657(2)    yes
O3 . H31 . O5 8_555 179.9(18) 0.821 1.952 2.773(2)    yes
O3 . H32 . O7 . 170.6(18) 0.813 1.967 2.772(2)    yes
O4 . H41 . O15 2_566 174.2(18) 0.813 1.946 2.756(2)    yes
O4 . H42 . O17 2_666 166.1(17) 0.834 1.967 2.784(2)    yes
O15 . H151 . O16 . 169.0(17) 0.826 2.027 2.842(2)    yes
O5 . H51 . O17 . 152.8(16) 0.799 2.094 2.829(2)    yes
O16 . H161 . O2 . 149.1(18) 0.809 2.074 2.800(2)    yes
O16 . H162 . O7 2_566 163.9(18) 0.837 1.913 2.727(2)    yes
O17 . H172 . O16 7_556 166.4(20) 0.847 1.918 2.748(2)    yes


_iucr_refine_instruction_details_constraints
;
#
# Punched on 10/03/14 at 10:03:03
#
#LIST     12                                                                    
BLOCK
CONT SCALE 
CONT MG   (    1 ,X'S,U'S)  UNTIL O    (    2 ) 
CONT H    (   21 ,X'S)  UNTIL H    (   22 ) 
CONT O    (    3 ,X'S,U'S) 
CONT H    (   31 ,X'S)  UNTIL H    (   32 ) 
CONT O    (    4 ,X'S,U'S) 
CONT H    (   41 ,X'S)  UNTIL H    (   42 ) 
CONT O    (    5 ,X'S,U'S)  UNTIL C    (   14 ) 
CONT H    (  141 ,X'S)  UNTIL H    (   82 ) 
CONT O    (   15 ,X'S,U'S) 
CONT H    (  151 ,X'S)  UNTIL H    (   51 ) 
CONT O    (   16 ,X'S,U'S)
CONT H    (  161 ,X'S)  UNTIL H    (  162 ) 
CONT O    (   17 ,X'S,U'S) 
CONT H    (  171 ,X'S)  UNTIL H    (  172 ) 
END                                                                             
;


_iucr_refine_instruction_details_restraints
;
#
# Punched on 10/03/14 at 10:03:03
#
#LIST     16                                                                    
NO 
REM   HREST   START (DO NOT REMOVE THIS LINE) 
REM NO H   NO #H U MULT DIST 
REM C-H 
REM >4           1.5    .96 DISORDER 
REM 1      1     1.2    .93 C C-H (ACETYLENE) 
REM 1      2     1.2    .93 C-C(H)-C 
REM 1      3     1.2    .98 (C)3-C-H 
REM 2      1     1.2    .93 C=C-H(2) 
REM 2      2     1.2    .97 (C)2-C-(H)2 
REM 3      1     1.5    .96 C-C-(H)3 
REM N-H 
REM >4           1.5    .89 DISORDER 
REM 1      1     1.2    .86 N-N/H 
REM 1      2     1.2    .86 (C)2-N-H 
REM 1      3     1.2    .89 (C)3-N-H 
REM 2      1     1.2    .86 C-N-(H)2
REM 2      2     1.2    .89 (C)2-N-(H)2 
REM 3      1     1.2    .89 C-H-(H)3 
REM O-H 
REM 1      1     1.5    .82 O-H 
REM 
REM DIST      ESD = 0.02 
REM VIB       ESD = 0.002 
REM ANGLE     ESD = 2.0 
REM       H ON O-HETRO ATOM 
DIST 0.82, 0.02 = 
CONT O ( 2) TO H(21)
CONT O ( 2) TO H(22) 
REST 0.029, 0.002 = H(21,U[ISO]) 
REST 0.029, 0.002 = H(22,U[ISO]) 
REM       H ON O-HETRO ATOM 
DIST 0.82, 0.02 = 
CONT O ( 3) TO H(31) 
CONT O ( 3) TO H(32) 
REST 0.035, 0.002 = H(31,U[ISO]) 
REST 0.035, 0.002 = H(32,U[ISO]) 
REM       H ON O-HETRO ATOM
DIST 0.82, 0.02 = 
CONT O ( 4) TO H(41) 
CONT O ( 4) TO H(42) 
REST 0.035, 0.002 = H(41,U[ISO]) 
REST 0.035, 0.002 = H(42,U[ISO]) 
REM       H ON O-HETRO ATOM 
DIST 0.82, 0.02 = 
CONT O ( 5) TO H(51) 
REST 0.026, 0.002 = H(51,U[ISO]) 
REM            2 H ON SP 3 
DIST 0.97, 0.02 = 
CONT C ( 8) TO H(81) 
CONT C ( 8) TO H(82) 
REST 0.036, 0.002 = H(81,U[ISO]) 
REST 0.036, 0.002 = H(82,U[ISO]) 
ANGLE 0.0, 2.0 = MEAN 
CONT H(81) TO C ( 8) TO O(7) 
CONT H(81) TO C ( 8) TO C(9) 
CONT H(82) TO C ( 8) TO O(7) 
CONT H(82) TO C ( 8) TO C(9) 
ANGLE 109.54, 2.0 =
CONT H(81) TO C ( 8) TO H(82) 
REM            1 H ON SP 2 
DIST 0.93, 0.02 = 
CONT C ( 11) TO H(111) 
REST 0.034, 0.002 = H(111,U[ISO]) 
ANGLE 0.0, 2.0 = MEAN 
CONT H(111) TO C ( 11) TO C(10) 
CONT H(111) TO C ( 11) TO C(12) 
PLANAR C ( 11) C(10) C(12) H(111) 
REM            1 H ON SP 2 
DIST 0.93, 0.02 = 
CONT C ( 12) TO H(121) 
REST 0.046, 0.002 = H(121,U[ISO]) 
ANGLE 0.0, 2.0 = MEAN 
CONT H(121) TO C ( 12) TO C(11) 
CONT H(121) TO C ( 12) TO C(13) 
PLANAR C ( 12) C(11) C(13) H(121) 
REM            1 H ON SP 2 
DIST 0.93, 0.02 = 
CONT C ( 13) TO H(131) 
REST 0.052, 0.002 = H(131,U[ISO])
ANGLE 0.0, 2.0 = MEAN 
CONT H(131) TO C ( 13) TO C(12) 
CONT H(131) TO C ( 13) TO C(14) 
PLANAR C ( 13) C(12) C(14) H(131) 
REM            1 H ON SP 2 
DIST 0.93, 0.02 = 
CONT C ( 14) TO H(141) 
REST 0.048, 0.002 = H(141,U[ISO])
ANGLE 0.0, 2.0 = MEAN 
CONT H(141) TO C ( 14) TO C(9) 
CONT H(141) TO C ( 14) TO C(13) 
PLANAR C ( 14) C(9) C(13) H(141) 
REM       H ON O-HETRO ATOM 
DIST 0.82, 0.02 = 
CONT O ( 15) TO H(151) 
REST 0.026, 0.002 = H(151,U[ISO]) 
REM       H ON O-HETRO ATOM 
DIST 0.82, 0.02 = 
CONT O ( 16) TO H(161) 
CONT O ( 16) TO H(162) 
REST 0.036, 0.002 = H(161,U[ISO])
REST 0.036, 0.002 = H(162,U[ISO]) 
REM       H ON O-HETRO ATOM 
DIST 0.82, 0.02 = 
CONT O ( 17) TO H(171) 
CONT O ( 17) TO H(172) 
REST 0.041, 0.002 = H(171,U[ISO]) 
REST 0.041, 0.002 = H(172,U[ISO]) 
REM   HREST   END (DO NOT REMOVE THIS LINE) 
END                                                                             
;


#===END


 
data_ss31
 
_audit_creation_method            SHELXL-2014/6
_chemical_name_systematic         ?
_chemical_name_common             ?
_chemical_melting_point           ?
_chemical_formula_moiety          'C42 H52 B6 Ca3 O20' 
_chemical_formula_sum
 'C42 H52 B6 Ca3 O20' 
_chemical_formula_weight          1061.94

loop_
 _atom_type_symbol
 _atom_type_description
 _atom_type_scat_dispersion_real
 _atom_type_scat_dispersion_imag
 _atom_type_scat_source
 'C'  'C'   0.0033   0.0016
 'International Tables Vol C Tables 4.2.6.8 and 6.1.1.4'
 'H'  'H'   0.0000   0.0000
 'International Tables Vol C Tables 4.2.6.8 and 6.1.1.4'
 'B'  'B'   0.0013   0.0007
 'International Tables Vol C Tables 4.2.6.8 and 6.1.1.4'
 'Ca'  'Ca'   0.2262   0.3064
 'International Tables Vol C Tables 4.2.6.8 and 6.1.1.4'
 'O'  'O'   0.0106   0.0060
 'International Tables Vol C Tables 4.2.6.8 and 6.1.1.4'
 
_space_group_crystal_system       triclinic
_space_group_IT_number            2
_space_group_name_H-M_alt         'P -1'
_space_group_name_Hall            '-P 1'
 
_shelx_space_group_comment
;
The symmetry employed for this shelxl refinement is uniquely defined
by the following loop, which should always be used as a source of
symmetry information in preference to the above space-group names.
They are only intended as comments.
;
 
loop_
 _space_group_symop_operation_xyz
 'x, y, z'
 '-x, -y, -z'
 
_cell_length_a                    10.4309(3)
_cell_length_b                    14.5330(4)
_cell_length_c                    16.1153(5)
_cell_angle_alpha                 98.105(3)
_cell_angle_beta                  98.045(2)
_cell_angle_gamma                 101.478(2)
_cell_volume                      2334.38(12)
_cell_formula_units_Z             2
_cell_measurement_temperature     173.0
_cell_measurement_reflns_used     11879
_cell_measurement_theta_min       2.8989
_cell_measurement_theta_max       27.7394
 
_exptl_crystal_description        plate
_exptl_crystal_colour             white
_exptl_crystal_density_meas       ?
_exptl_crystal_density_method     ?
_exptl_crystal_density_diffrn     1.511          
_exptl_crystal_F_000              1106
_exptl_transmission_factor_min    ?
_exptl_transmission_factor_max    ?
_exptl_crystal_size_max           0.14
_exptl_crystal_size_mid           0.052
_exptl_crystal_size_min           0.041
_exptl_absorpt_coefficient_mu     0.435
_shelx_estimated_absorpt_T_min    ?
_shelx_estimated_absorpt_T_max    ?
_exptl_absorpt_correction_type    multi-scan
_exptl_absorpt_correction_T_min   0.961
_exptl_absorpt_correction_T_max   1.000
_exptl_absorpt_process_details    'CrysAlis PRO; Oxford Diffraction'
_exptl_absorpt_special_details    ?
_diffrn_ambient_temperature       173.0
_diffrn_radiation_wavelength      0.71073
_diffrn_radiation_type            MoK\a
_diffrn_source                    ?
_diffrn_measurement_device_type   ?
_diffrn_measurement_method        ?
_diffrn_detector_area_resol_mean  ?
_diffrn_reflns_number             25347
_diffrn_reflns_av_unetI/netI      0.0480
_diffrn_reflns_av_R_equivalents   0.0351
_diffrn_reflns_limit_h_min        -12
_diffrn_reflns_limit_h_max        12
_diffrn_reflns_limit_k_min        -18
_diffrn_reflns_limit_k_max        18
_diffrn_reflns_limit_l_min        -20
_diffrn_reflns_limit_l_max        20
_diffrn_reflns_theta_min          2.905
_diffrn_reflns_theta_max          27.800
_diffrn_reflns_theta_full         25.242
_diffrn_measured_fraction_theta_max   0.814
_diffrn_measured_fraction_theta_full  0.983
_diffrn_reflns_Laue_measured_fraction_max    0.814
_diffrn_reflns_Laue_measured_fraction_full   0.983
_diffrn_reflns_point_group_measured_fraction_max   0.814
_diffrn_reflns_point_group_measured_fraction_full  0.983
_reflns_number_total              8984
_reflns_number_gt                 7134
_reflns_threshold_expression      'I > 2\s(I)'
_reflns_Friedel_coverage          0.000
_reflns_Friedel_fraction_max      .
_reflns_Friedel_fraction_full     .
 
_reflns_special_details
;
 Reflections were merged by SHELXL according to the crystal
 class for the calculation of statistics and refinement.
 
 _reflns_Friedel_fraction is defined as the number of unique
 Friedel pairs measured divided by the number that would be
 possible theoretically, ignoring centric projections and
 systematic absences.
;
 
_computing_data_collection        ?
_computing_cell_refinement        ?
_computing_data_reduction         ?
_computing_structure_solution     ?
_computing_structure_refinement 'SHELXL-2014/6 (Sheldrick, 2014)'
_computing_molecular_graphics     ?
_computing_publication_material   ?
_refine_special_details           ?
_refine_ls_structure_factor_coef  Fsqd
_refine_ls_matrix_type            full
_refine_ls_weighting_scheme       calc
_refine_ls_weighting_details
'w=1/[\s^2^(Fo^2^)+(0.0290P)^2^] where P=(1.0000Fo^2^+0.0000Fc^2^)'
_atom_sites_solution_primary      ?
_atom_sites_solution_secondary    ?
_atom_sites_solution_hydrogens    mixed
_refine_ls_hydrogen_treatment     constr
_refine_ls_extinction_method      none
_refine_ls_extinction_coef        .
_refine_ls_number_reflns          8984
_refine_ls_number_parameters      640
_refine_ls_number_restraints      0
_refine_ls_R_factor_all           0.0699
_refine_ls_R_factor_gt            0.0513
_refine_ls_wR_factor_ref          0.1217
_refine_ls_wR_factor_gt           0.1190
_refine_ls_goodness_of_fit_ref    1.832
_refine_ls_restrained_S_all       1.832
_refine_ls_shift/su_max           0.001
_refine_ls_shift/su_mean          0.000
 
loop_
 _atom_site_label
 _atom_site_type_symbol
 _atom_site_fract_x
 _atom_site_fract_y
 _atom_site_fract_z
 _atom_site_U_iso_or_equiv
 _atom_site_adp_type
 _atom_site_occupancy
 _atom_site_site_symmetry_order  
 _atom_site_calc_flag
 _atom_site_refinement_flags_posn
 _atom_site_refinement_flags_adp
 _atom_site_refinement_flags_occupancy
 _atom_site_disorder_assembly
 _atom_site_disorder_group
Ca1 Ca 0.72384(6) 0.39965(4) 0.49938(4) 0.01369(15) Uani 1 1 d . . . . .
Ca2 Ca 0.90985(6) 0.70601(4) 0.49700(4) 0.01467(16) Uani 1 1 d . . . . .
Ca3 Ca 0.70383(6) 0.12866(4) 0.50932(4) 0.01342(15) Uani 1 1 d . . . . .
O1 O 0.7791(2) 0.66149(14) 0.60068(13) 0.0176(5) Uani 1 1 d . . . . .
H25 H 0.7074 0.6624 0.5879 0.026 Uiso 1 1 d R U . . .
O2 O 0.85998(19) 0.07090(14) 0.60532(13) 0.0166(5) Uani 1 1 d . . . . .
H21 H 0.9290 0.0458 0.5999 0.025 Uiso 1 1 d R U . . .
O3 O 0.74134(19) 0.28410(14) 0.60484(12) 0.0140(5) Uani 1 1 d . . . . .
O4 O 0.69426(19) 0.50486(14) 0.62566(13) 0.0183(5) Uani 1 1 d . . . . .
H26 H 0.6882 0.4763 0.6657 0.027 Uiso 1 1 d R U . . .
O5 O 0.6465(2) 0.05716(14) 0.62226(13) 0.0172(5) Uani 1 1 d . . . . .
H40 H 0.5783 0.0383 0.6315 0.026 Uiso 1 1 d R U . . .
O6 O 0.68811(19) 0.23849(14) 0.40845(13) 0.0144(5) Uani 1 1 d . . . . .
O7 O 0.9045(2) 0.33231(14) 0.41435(13) 0.0165(5) Uani 1 1 d . . . . .
H45 H 0.9535 0.3544 0.3806 0.025 Uiso 1 1 d R U . . .
O8 O 0.88633(19) 0.17296(14) 0.43110(12) 0.0149(5) Uani 1 1 d . . . . .
H44 H 0.8832 0.1250 0.3994 0.022 Uiso 1 1 d R U . . .
O9 O 0.7396(2) -0.08438(14) 0.62751(13) 0.0176(5) Uani 1 1 d . . . . .
O10 O 0.48744(19) 0.32649(15) 0.49910(13) 0.0201(5) Uani 1 1 d . . . . .
H51 H 0.4407 0.3423 0.5313 0.030 Uiso 1 1 d R U . . .
H52 H 0.4754 0.2683 0.5037 0.030 Uiso 1 1 d R U . . .
O11 O 0.92774(19) 0.41400(14) 0.60311(12) 0.0152(5) Uani 1 1 d . . . . .
H53 H 0.9182 0.4628 0.6302 0.023 Uiso 1 1 d R U . . .
O12 O 0.8477(2) 0.85500(16) 0.49298(14) 0.0256(6) Uani 1 1 d . . . . .
H37 H 0.8216 0.8754 0.5408 0.038 Uiso 1 1 d R U . . .
H49 H 0.8388 0.8799 0.4555 0.038 Uiso 1 1 d R U . . .
O13 O 0.82641(19) 0.53220(14) 0.43639(13) 0.0157(5) Uani 1 1 d . . . . .
H47 H 0.8923 0.5302 0.4107 0.024 Uiso 1 1 d R U . . .
O14 O 0.6022(2) 0.48424(15) 0.41534(13) 0.0193(5) Uani 1 1 d . . . . .
H30 H 0.5215 0.4846 0.3982 0.029 Uiso 1 1 d R U . . .
O15 O 0.7015(2) 0.64718(15) 0.39559(13) 0.0177(5) Uani 1 1 d . . . . .
O16 O 0.97113(19) 0.26562(14) 0.61231(13) 0.0169(5) Uani 1 1 d . . . . .
H50 H 0.9573 0.2167 0.6273 0.025 Uiso 1 1 d R U . . .
O17 O 0.9283(2) 0.58894(15) 0.68177(13) 0.0180(5) Uani 1 1 d . . . . .
O18 O 0.4725(2) 0.13409(15) 0.50360(13) 0.0168(5) Uani 1 1 d . . . . .
H17 H 0.4157 0.1165 0.4571 0.025 Uiso 1 1 d R U . . .
H32 H 0.5511 0.8921 0.4648 0.025 Uiso 1 1 d R U . . .
O19 O 0.8303(2) -0.02933(15) 0.34957(13) 0.0200(5) Uani 1 1 d . . . . .
O20 O 0.6346(2) -0.00581(15) 0.40389(13) 0.0182(5) Uani 1 1 d . . . . .
C1 C 0.6538(3) 0.6538(2) 0.7947(2) 0.0224(8) Uani 1 1 d . . . . .
H4 H 0.5741 0.6500 0.7589 0.027 Uiso 1 1 calc R U . . .
C2 C 0.8801(3) 0.6408(2) 0.8165(2) 0.0192(7) Uani 1 1 d . . . . .
C3 C 0.6418(3) 0.1817(2) 0.2601(2) 0.0196(7) Uani 1 1 d . . . . .
C4 C 0.6595(3) 0.2879(2) 0.67023(19) 0.0168(7) Uani 1 1 d . . . . .
H1 H 0.6114 0.2243 0.6729 0.020 Uiso 1 1 calc R U . . .
H2 H 0.5958 0.3267 0.6581 0.020 Uiso 1 1 calc R U . . .
C5 C 0.7516(3) 0.3311(2) 0.7531(2) 0.0172(7) Uani 1 1 d . . . . .
C6 C 0.9821(3) 0.3828(2) 0.81389(19) 0.0194(7) Uani 1 1 d . . . . .
H22 H 1.0710 0.3937 0.8081 0.023 Uiso 1 1 calc R U . . .
C7 C 0.8842(3) 0.3500(2) 0.7425(2) 0.0158(7) Uani 1 1 d . . . . .
C8 C 0.7638(3) 0.6354(2) 0.7602(2) 0.0179(7) Uani 1 1 d . . . . .
C9 C 0.7160(3) 0.3482(2) 0.8332(2) 0.0272(8) Uani 1 1 d . . . . .
H28 H 0.6272 0.3367 0.8394 0.033 Uiso 1 1 calc R U . . .
C10 C 0.9845(3) 0.6098(2) 0.7709(2) 0.0202(7) Uani 1 1 d . . . . .
H3 H 1.0644 0.6601 0.7818 0.024 Uiso 1 1 calc R U . . .
H5 H 1.0068 0.5535 0.7898 0.024 Uiso 1 1 calc R U . . .
C11 C 0.8159(4) 0.3827(3) 0.9029(2) 0.0328(9) Uani 1 1 d . . . . .
H41 H 0.7939 0.3949 0.9567 0.039 Uiso 1 1 calc R U . . .
C12 C 0.9482(4) 0.3994(3) 0.8940(2) 0.0307(9) Uani 1 1 d . . . . .
H36 H 1.0143 0.4217 0.9418 0.037 Uiso 1 1 calc R U . . .
C13 C 0.7793(3) 0.1956(2) 0.28166(19) 0.0154(7) Uani 1 1 d . . . . .
C14 C 0.8907(4) 0.6671(2) 0.9036(2) 0.0292(9) Uani 1 1 d . . . . .
H18 H 0.9706 0.6725 0.9398 0.035 Uiso 1 1 calc R U . . .
C15 C 0.7807(4) 0.6850(3) 0.9360(2) 0.0331(9) Uani 1 1 d . . . . .
H33 H 0.7861 0.7022 0.9944 0.040 Uiso 1 1 calc R U . . .
C16 C 0.5814(3) 0.2104(2) 0.33619(19) 0.0194(7) Uani 1 1 d . . . . .
H6 H 0.5395 0.2631 0.3281 0.023 Uiso 1 1 calc R U . . .
H48 H 0.5148 0.1574 0.3449 0.023 Uiso 1 1 calc R U . . .
C19 C 0.8065(3) -0.0562(2) 0.7762(2) 0.0171(7) Uani 1 1 d . . . . .
C20 C 0.8070(3) 0.0345(2) 0.7559(2) 0.0151(7) Uani 1 1 d . . . . .
C21 C 0.7732(3) -0.1308(2) 0.6978(2) 0.0206(7) Uani 1 1 d . . . . .
H15 H 0.8486 -0.1589 0.6904 0.025 Uiso 1 1 calc R U . . .
H16 H 0.6987 -0.1809 0.7020 0.025 Uiso 1 1 calc R U . . .
C22 C 0.6327(3) -0.0813(2) 0.2435(2) 0.0161(7) Uani 1 1 d . . . . .
C23 C 0.6784(3) 0.6044(2) 0.2465(2) 0.0205(8) Uani 1 1 d . . . . .
C24 C 0.8487(3) 0.1672(2) 0.2179(2) 0.0228(8) Uani 1 1 d . . . . .
H8 H 0.9404 0.1748 0.2304 0.027 Uiso 1 1 calc R U . . .
C25 C 0.6887(3) 0.6855(2) 0.3177(2) 0.0204(7) Uani 1 1 d . . . . .
H7 H 0.7656 0.7358 0.3183 0.024 Uiso 1 1 calc R U . . .
H12 H 0.6099 0.7115 0.3109 0.024 Uiso 1 1 calc R U . . .
C26 C 0.4919(3) -0.1417(3) 0.1079(2) 0.0287(8) Uani 1 1 d . . . . .
H11 H 0.4077 -0.1585 0.0747 0.034 Uiso 1 1 calc R U . . .
C27 C 0.7416(3) -0.0930(2) 0.2050(2) 0.0198(7) Uani 1 1 d . . . . .
C28 C 0.5063(3) -0.1074(2) 0.1930(2) 0.0237(8) Uani 1 1 d . . . . .
H39 H 0.4320 -0.1015 0.2173 0.028 Uiso 1 1 calc R U . . .
C29 C 0.7274(4) -0.1270(2) 0.1191(2) 0.0274(8) Uani 1 1 d . . . . .
H38 H 0.8014 -0.1332 0.0944 0.033 Uiso 1 1 calc R U . . .
C30 C 0.8410(3) 0.1121(2) 0.8215(2) 0.0216(8) Uani 1 1 d . . . . .
H43 H 0.8454 0.1732 0.8094 0.026 Uiso 1 1 calc R U . . .
C31 C 0.7818(4) 0.1280(3) 0.1369(2) 0.0306(9) Uani 1 1 d . . . . .
H23 H 0.8289 0.1095 0.0950 0.037 Uiso 1 1 calc R U . . .
C32 C 0.6025(4) -0.1518(3) 0.0706(2) 0.0298(9) Uani 1 1 d . . . . .
H29 H 0.5915 -0.1753 0.0127 0.036 Uiso 1 1 calc R U . . .
C33 C 0.5736(3) 0.1421(2) 0.1787(2) 0.0269(8) Uani 1 1 d . . . . .
H34 H 0.4818 0.1333 0.1660 0.032 Uiso 1 1 calc R U . . .
C34 C 0.8678(3) -0.0613(2) 0.2690(2) 0.0242(8) Uani 1 1 d . . . . .
H13 H 0.9117 -0.1138 0.2732 0.029 Uiso 1 1 calc R U . . .
H31 H 0.9278 -0.0097 0.2524 0.029 Uiso 1 1 calc R U . . .
C35 C 0.6956(3) 0.5221(2) 0.2786(2) 0.0176(7) Uani 1 1 d . . . . .
C36 C 0.6954(3) 0.4414(2) 0.2202(2) 0.0242(8) Uani 1 1 d . . . . .
H9 H 0.7076 0.3858 0.2394 0.029 Uiso 1 1 calc R U . . .
C37 C 0.6627(4) 0.6776(2) 0.8821(2) 0.0309(9) Uani 1 1 d . . . . .
H42 H 0.5886 0.6887 0.9045 0.037 Uiso 1 1 calc R U . . .
C38 C 0.8348(3) -0.0699(3) 0.8596(2) 0.0253(8) Uani 1 1 d . . . . .
H14 H 0.8339 -0.1306 0.8719 0.030 Uiso 1 1 calc R U . . .
C39 C 0.6772(3) 0.4433(3) 0.1335(2) 0.0327(9) Uani 1 1 d . . . . .
H19 H 0.6788 0.3895 0.0953 0.039 Uiso 1 1 calc R U . . .
C40 C 0.8644(4) 0.0083(3) 0.9241(2) 0.0321(9) Uani 1 1 d . . . . .
H27 H 0.8816 0.0002 0.9805 0.039 Uiso 1 1 calc R U . . .
C41 C 0.6585(3) 0.6065(3) 0.1604(2) 0.0309(9) Uani 1 1 d . . . . .
H20 H 0.6463 0.6618 0.1406 0.037 Uiso 1 1 calc R U . . .
C42 C 0.8686(3) 0.0990(3) 0.9052(2) 0.0289(9) Uani 1 1 d . . . . .
H35 H 0.8901 0.1515 0.9489 0.035 Uiso 1 1 calc R U . . .
C43 C 0.6567(3) 0.5248(3) 0.1036(2) 0.0333(9) Uani 1 1 d . . . . .
H24 H 0.6418 0.5248 0.0454 0.040 Uiso 1 1 calc R U . . .
C44 C 0.6455(4) 0.1158(3) 0.1169(2) 0.0343(9) Uani 1 1 d . . . . .
H10 H 0.6019 0.0898 0.0617 0.041 Uiso 1 1 calc R U . . .
B1 B 0.7631(3) 0.0228(2) 0.6547(2) 0.0151(8) Uani 1 1 d . . . . .
B2 B 0.8226(3) 0.2356(3) 0.3802(2) 0.0153(8) Uani 1 1 d . . . . .
B3 B 0.8903(3) 0.3306(3) 0.6438(2) 0.0153(8) Uani 1 1 d . . . . .
B4 B 0.7864(3) 0.5996(3) 0.6659(2) 0.0156(8) Uani 1 1 d . . . . .
B5 B 0.6889(4) -0.0361(2) 0.3392(2) 0.0166(8) Uani 1 1 d . . . . .
B6 B 0.7051(3) 0.5418(3) 0.3792(2) 0.0174(8) Uani 1 1 d . . . . .
 
loop_
 _atom_site_aniso_label
 _atom_site_aniso_U_11
 _atom_site_aniso_U_22
 _atom_site_aniso_U_33
 _atom_site_aniso_U_23
 _atom_site_aniso_U_13
 _atom_site_aniso_U_12
Ca1 0.0124(3) 0.0109(3) 0.0182(4) 0.0036(3) 0.0019(3) 0.0032(3)
Ca2 0.0111(3) 0.0133(3) 0.0197(4) 0.0054(3) 0.0026(3) 0.0010(3)
Ca3 0.0133(3) 0.0102(3) 0.0169(3) 0.0030(3) 0.0034(3) 0.0019(3)
O1 0.0157(11) 0.0193(12) 0.0194(12) 0.0067(10) 0.0054(9) 0.0037(9)
O2 0.0133(11) 0.0177(12) 0.0205(12) 0.0060(10) 0.0054(9) 0.0038(9)
O3 0.0095(10) 0.0146(11) 0.0169(12) 0.0020(9) 0.0036(9) -0.0001(9)
O4 0.0183(12) 0.0134(12) 0.0228(12) 0.0036(10) 0.0057(10) 0.0008(9)
O5 0.0126(11) 0.0170(12) 0.0227(12) 0.0075(10) 0.0032(9) 0.0022(9)
O6 0.0111(11) 0.0160(11) 0.0180(12) 0.0041(10) 0.0026(9) 0.0064(9)
O7 0.0166(11) 0.0112(11) 0.0210(12) 0.0037(10) 0.0063(9) -0.0016(9)
O8 0.0165(11) 0.0095(11) 0.0185(12) -0.0002(9) 0.0011(9) 0.0054(9)
O9 0.0210(12) 0.0132(11) 0.0183(12) 0.0033(10) 0.0009(10) 0.0041(9)
O10 0.0160(12) 0.0158(12) 0.0304(13) 0.0041(10) 0.0085(10) 0.0051(9)
O11 0.0144(11) 0.0142(11) 0.0171(12) 0.0029(10) 0.0046(9) 0.0025(9)
O12 0.0312(14) 0.0251(13) 0.0266(13) 0.0082(11) 0.0086(11) 0.0154(11)
O13 0.0114(11) 0.0173(12) 0.0206(12) 0.0054(10) 0.0055(9) 0.0049(9)
O14 0.0107(11) 0.0214(12) 0.0271(13) 0.0106(11) 0.0031(9) 0.0023(9)
O15 0.0179(12) 0.0160(12) 0.0210(12) 0.0053(10) 0.0044(10) 0.0056(9)
O16 0.0181(12) 0.0130(11) 0.0224(12) 0.0046(10) 0.0084(10) 0.0059(9)
O17 0.0172(11) 0.0160(12) 0.0206(12) 0.0026(10) 0.0032(10) 0.0040(9)
O18 0.0135(11) 0.0197(12) 0.0167(12) 0.0061(10) 0.0014(9) 0.0015(9)
O19 0.0161(12) 0.0220(13) 0.0202(12) 0.0009(10) 0.0020(10) 0.0029(10)
O20 0.0210(12) 0.0137(12) 0.0172(12) 0.0002(10) 0.0063(10) -0.0027(9)
C1 0.0229(18) 0.0205(18) 0.0245(19) 0.0040(16) 0.0088(15) 0.0032(15)
C2 0.0245(18) 0.0105(16) 0.0210(18) 0.0048(14) 0.0047(15) -0.0017(14)
C3 0.0215(18) 0.0167(17) 0.0212(18) 0.0081(15) 0.0027(15) 0.0031(14)
C4 0.0133(16) 0.0176(17) 0.0205(18) 0.0045(15) 0.0074(14) 0.0019(13)
C5 0.0190(17) 0.0143(17) 0.0192(18) 0.0045(14) 0.0040(14) 0.0040(14)
C6 0.0219(18) 0.0170(18) 0.0188(18) 0.0050(15) 0.0038(14) 0.0016(14)
C7 0.0159(16) 0.0111(16) 0.0205(18) 0.0029(14) 0.0022(14) 0.0036(13)
C8 0.0234(18) 0.0113(16) 0.0190(18) 0.0045(14) 0.0035(14) 0.0029(14)
C9 0.028(2) 0.028(2) 0.026(2) 0.0026(17) 0.0133(17) 0.0040(16)
C10 0.0207(18) 0.0142(17) 0.0236(19) 0.0043(15) -0.0024(15) 0.0027(14)
C11 0.044(2) 0.038(2) 0.0168(19) 0.0030(17) 0.0135(18) 0.0046(19)
C12 0.038(2) 0.029(2) 0.021(2) 0.0039(17) -0.0009(17) 0.0015(17)
C13 0.0186(17) 0.0082(15) 0.0207(18) 0.0059(14) 0.0059(14) 0.0020(13)
C14 0.036(2) 0.026(2) 0.0212(19) 0.0049(17) -0.0024(16) 0.0008(17)
C15 0.049(3) 0.030(2) 0.0176(19) 0.0013(17) 0.0104(18) 0.0024(19)
C16 0.0114(16) 0.0250(19) 0.0208(18) 0.0072(15) -0.0014(14) 0.0023(14)
C19 0.0113(16) 0.0214(18) 0.0198(18) 0.0058(15) 0.0042(13) 0.0038(14)
C20 0.0102(15) 0.0144(17) 0.0224(18) 0.0032(15) 0.0045(13) 0.0051(13)
C21 0.0158(17) 0.0193(18) 0.0281(19) 0.0093(16) 0.0018(15) 0.0046(14)
C22 0.0155(16) 0.0128(16) 0.0202(18) 0.0051(14) 0.0017(14) 0.0028(13)
C23 0.0101(16) 0.029(2) 0.0238(19) 0.0095(16) 0.0054(14) 0.0019(14)
C24 0.030(2) 0.0194(18) 0.0229(19) 0.0056(16) 0.0106(16) 0.0093(15)
C25 0.0150(17) 0.0193(18) 0.031(2) 0.0112(16) 0.0051(15) 0.0075(14)
C26 0.0249(19) 0.031(2) 0.025(2) 0.0024(17) -0.0051(16) 0.0036(16)
C27 0.0213(18) 0.0162(17) 0.0247(19) 0.0039(15) 0.0073(15) 0.0084(14)
C28 0.0184(18) 0.028(2) 0.025(2) 0.0037(17) 0.0050(15) 0.0056(15)
C29 0.031(2) 0.029(2) 0.026(2) 0.0050(17) 0.0131(17) 0.0120(17)
C30 0.0183(17) 0.0203(18) 0.0238(19) 0.0008(16) 0.0012(15) 0.0026(14)
C31 0.050(3) 0.026(2) 0.020(2) 0.0049(17) 0.0141(18) 0.0127(18)
C32 0.043(2) 0.030(2) 0.0156(18) -0.0019(16) 0.0060(17) 0.0092(18)
C33 0.0257(19) 0.027(2) 0.024(2) 0.0057(17) -0.0054(16) 0.0033(16)
C34 0.0199(18) 0.027(2) 0.028(2) 0.0048(17) 0.0081(15) 0.0073(15)
C35 0.0117(16) 0.0170(17) 0.0238(18) 0.0047(15) 0.0030(14) 0.0019(13)
C36 0.0199(18) 0.025(2) 0.026(2) 0.0028(16) 0.0048(15) 0.0022(15)
C37 0.040(2) 0.023(2) 0.031(2) 0.0008(17) 0.0198(19) 0.0036(17)
C38 0.029(2) 0.026(2) 0.026(2) 0.0131(17) 0.0054(16) 0.0101(16)
C39 0.026(2) 0.041(2) 0.026(2) -0.0055(19) 0.0081(16) -0.0010(17)
C40 0.038(2) 0.043(2) 0.0172(19) 0.0085(18) 0.0017(16) 0.0114(19)
C41 0.0192(19) 0.044(2) 0.032(2) 0.018(2) 0.0030(16) 0.0050(17)
C42 0.033(2) 0.031(2) 0.0206(19) -0.0034(17) 0.0029(16) 0.0086(17)
C43 0.025(2) 0.055(3) 0.0178(19) 0.008(2) 0.0046(16) 0.0003(18)
C44 0.056(3) 0.026(2) 0.0151(19) 0.0002(17) -0.0025(18) 0.0039(19)
B1 0.0139(18) 0.0099(18) 0.022(2) 0.0033(16) 0.0063(16) 0.0022(14)
B2 0.0125(18) 0.0122(18) 0.022(2) 0.0045(16) 0.0059(15) 0.0018(15)
B3 0.0118(18) 0.0141(19) 0.019(2) 0.0048(16) 0.0024(15) 0.0006(15)
B4 0.0125(18) 0.0132(19) 0.021(2) 0.0044(16) 0.0044(15) 0.0010(15)
B5 0.0198(19) 0.0098(18) 0.020(2) 0.0050(16) 0.0039(16) 0.0013(15)
B6 0.0137(19) 0.0128(19) 0.027(2) 0.0042(17) 0.0034(16) 0.0056(15)
 
_geom_special_details
;
 All esds (except the esd in the dihedral angle between two l.s. planes)
 are estimated using the full covariance matrix.  The cell esds are taken
 into account individually in the estimation of esds in distances, angles
 and torsion angles; correlations between esds in cell parameters are only
 used when they are defined by crystal symmetry.  An approximate (isotropic)
 treatment of cell esds is used for estimating esds involving l.s. planes.
;
 
loop_
 _geom_bond_atom_site_label_1
 _geom_bond_atom_site_label_2
 _geom_bond_distance
 _geom_bond_site_symmetry_2
 _geom_bond_publ_flag
Ca1 O14 2.359(2) . ?
Ca1 O13 2.433(2) . ?
Ca1 O4 2.462(2) . ?
Ca1 O11 2.468(2) . ?
Ca1 O10 2.483(2) . ?
Ca1 O6 2.511(2) . ?
Ca1 O3 2.565(2) . ?
Ca1 O7 2.733(2) . ?
Ca1 B6 3.041(4) . ?
Ca1 B3 3.108(4) . ?
Ca1 B2 3.267(4) . ?
Ca1 Ca3 3.9294(9) . ?
Ca1 H53 2.6291 . ?
Ca2 O16 2.330(2) 2_766 ?
Ca2 O1 2.380(2) . ?
Ca2 O12 2.387(2) . ?
Ca2 O7 2.445(2) 2_766 ?
Ca2 O15 2.449(2) . ?
Ca2 O8 2.491(2) 2_766 ?
Ca2 O13 2.507(2) . ?
Ca2 B6 3.069(4) . ?
Ca2 B2 3.076(4) 2_766 ?
Ca2 O11 3.108(2) 2_766 ?
Ca2 Ca3 4.2839(9) 2_766 ?
Ca2 Ca1 4.3885(9) 2_766 ?
Ca2 H25 2.7573 . ?
Ca2 H47 2.6899 . ?
Ca3 O5 2.311(2) . ?
Ca3 O20 2.321(2) . ?
Ca3 O18 2.420(2) . ?
Ca3 O2 2.440(2) . ?
Ca3 O6 2.445(2) . ?
Ca3 O8 2.458(2) . ?
Ca3 O3 2.475(2) . ?
Ca3 B2 3.025(4) . ?
Ca3 B1 3.037(4) . ?
Ca3 Ca2 4.2839(8) 2_766 ?
Ca3 H44 2.7543 . ?
O1 B4 1.480(4) . ?
O1 H25 0.7497 . ?
O2 B1 1.497(4) . ?
O2 H21 0.8784 . ?
O3 C4 1.448(3) . ?
O3 B3 1.567(4) . ?
O4 B4 1.512(4) . ?
O4 H26 0.8187 . ?
O5 B1 1.462(4) . ?
O5 H40 0.7530 . ?
O6 C16 1.443(3) . ?
O6 B2 1.541(4) . ?
O7 B2 1.476(4) . ?
O7 Ca2 2.445(2) 2_766 ?
O7 H45 0.8492 . ?
O8 B2 1.497(4) . ?
O8 Ca2 2.491(2) 2_766 ?
O8 H44 0.7965 . ?
O9 C21 1.435(4) . ?
O9 B1 1.518(4) . ?
O10 H51 0.8011 . ?
O10 H52 0.8451 . ?
O11 B3 1.469(4) . ?
O11 Ca2 3.108(2) 2_766 ?
O11 H53 0.8098 . ?
O12 H37 0.8850 . ?
O12 H49 0.7511 . ?
O13 B6 1.500(4) . ?
O13 H47 0.8535 . ?
O14 B6 1.466(4) . ?
O14 H30 0.8500 . ?
O15 C25 1.444(4) . ?
O15 B6 1.525(4) . ?
O16 B3 1.470(4) . ?
O16 Ca2 2.330(2) 2_766 ?
O16 H50 0.7755 . ?
O17 C10 1.439(4) . ?
O17 B4 1.508(4) . ?
O18 H17 0.8604 . ?
O19 B5 1.442(4) . ?
O19 C34 1.449(4) . ?
O20 B5 1.318(4) . ?
C1 C37 1.387(5) . ?
C1 C8 1.399(4) . ?
C1 H4 0.9300 . ?
C2 C14 1.385(4) . ?
C2 C8 1.391(4) . ?
C2 C10 1.502(4) . ?
C3 C33 1.386(4) . ?
C3 C13 1.394(4) . ?
C3 C16 1.500(4) . ?
C4 C5 1.505(4) . ?
C4 H1 0.9700 . ?
C4 H2 0.9700 . ?
C5 C9 1.395(4) . ?
C5 C7 1.395(4) . ?
C6 C7 1.384(4) . ?
C6 C12 1.388(5) . ?
C6 H22 0.9300 . ?
C7 B3 1.589(5) . ?
C8 B4 1.601(5) . ?
C9 C11 1.380(5) . ?
C9 H28 0.9300 . ?
C10 H3 0.9700 . ?
C10 H5 0.9700 . ?
C11 C12 1.384(5) . ?
C11 H41 0.9300 . ?
C12 H36 0.9300 . ?
C13 C24 1.399(4) . ?
C13 B2 1.581(5) . ?
C14 C15 1.380(5) . ?
C14 H18 0.9300 . ?
C15 C37 1.379(5) . ?
C15 H33 0.9300 . ?
C16 H6 0.9700 . ?
C16 H48 0.9700 . ?
C19 C38 1.386(4) . ?
C19 C20 1.401(4) . ?
C19 C21 1.494(4) . ?
C20 C30 1.383(4) . ?
C20 B1 1.608(5) . ?
C21 H15 0.9700 . ?
C21 H16 0.9700 . ?
C22 C27 1.396(4) . ?
C22 C28 1.400(4) . ?
C22 B5 1.568(5) . ?
C23 C41 1.380(5) . ?
C23 C35 1.402(4) . ?
C23 C25 1.500(5) . ?
C24 C31 1.377(5) . ?
C24 H8 0.9300 . ?
C25 H7 0.9700 . ?
C25 H12 0.9700 . ?
C26 C28 1.367(5) . ?
C26 C32 1.397(5) . ?
C26 H11 0.9300 . ?
C27 C29 1.379(4) . ?
C27 C34 1.501(4) . ?
C28 H39 0.9300 . ?
C29 C32 1.374(5) . ?
C29 H38 0.9300 . ?
C30 C42 1.386(4) . ?
C30 H43 0.9300 . ?
C31 C44 1.383(5) . ?
C31 H23 0.9300 . ?
C32 H29 0.9300 . ?
C33 C44 1.385(5) . ?
C33 H34 0.9300 . ?
C34 H13 0.9700 . ?
C34 H31 0.9700 . ?
C35 C36 1.397(5) . ?
C35 B6 1.590(5) . ?
C36 C39 1.387(5) . ?
C36 H9 0.9300 . ?
C37 H42 0.9300 . ?
C38 C40 1.380(5) . ?
C38 H14 0.9300 . ?
C39 C43 1.383(5) . ?
C39 H19 0.9300 . ?
C40 C42 1.388(5) . ?
C40 H27 0.9300 . ?
C41 C43 1.388(5) . ?
C41 H20 0.9300 . ?
C42 H35 0.9300 . ?
C43 H24 0.9300 . ?
C44 H10 0.9300 . ?
B2 Ca2 3.076(4) 2_766 ?
 
loop_
 _geom_angle_atom_site_label_1
 _geom_angle_atom_site_label_2
 _geom_angle_atom_site_label_3
 _geom_angle
 _geom_angle_site_symmetry_1
 _geom_angle_site_symmetry_3
 _geom_angle_publ_flag
O14 Ca1 O13 56.41(7) . . ?
O14 Ca1 O4 87.84(7) . . ?
O13 Ca1 O4 93.26(7) . . ?
O14 Ca1 O11 144.23(7) . . ?
O13 Ca1 O11 92.40(7) . . ?
O4 Ca1 O11 75.94(7) . . ?
O14 Ca1 O10 75.24(7) . . ?
O13 Ca1 O10 131.61(7) . . ?
O4 Ca1 O10 82.30(7) . . ?
O11 Ca1 O10 131.91(7) . . ?
O14 Ca1 O6 104.13(7) . . ?
O13 Ca1 O6 114.69(7) . . ?
O4 Ca1 O6 151.81(7) . . ?
O11 Ca1 O6 105.02(7) . . ?
O10 Ca1 O6 76.45(7) . . ?
O14 Ca1 O3 152.03(7) . . ?
O13 Ca1 O3 150.02(7) . . ?
O4 Ca1 O3 82.61(7) . . ?
O11 Ca1 O3 57.74(6) . . ?
O10 Ca1 O3 77.46(7) . . ?
O6 Ca1 O3 74.92(7) . . ?
O14 Ca1 O7 110.74(7) . . ?
O13 Ca1 O7 75.06(6) . . ?
O4 Ca1 O7 145.14(7) . . ?
O11 Ca1 O7 71.97(6) . . ?
O10 Ca1 O7 129.99(7) . . ?
O6 Ca1 O7 53.67(6) . . ?
O3 Ca1 O7 91.46(6) . . ?
O14 Ca1 B6 28.05(8) . . ?
O13 Ca1 B6 29.22(8) . . ?
O4 Ca1 B6 95.68(9) . . ?
O11 Ca1 B6 121.29(9) . . ?
O10 Ca1 B6 102.96(8) . . ?
O6 Ca1 B6 106.90(9) . . ?
O3 Ca1 B6 178.18(9) . . ?
O7 Ca1 B6 89.60(8) . . ?
O14 Ca1 B3 166.19(9) . . ?
O13 Ca1 B3 119.87(8) . . ?
O4 Ca1 B3 78.94(8) . . ?
O11 Ca1 B3 27.63(8) . . ?
O10 Ca1 B3 106.55(8) . . ?
O6 Ca1 B3 89.51(8) . . ?
O3 Ca1 B3 30.17(8) . . ?
O7 Ca1 B3 78.95(8) . . ?
B6 Ca1 B3 148.90(10) . . ?
O14 Ca1 B2 110.98(8) . . ?
O13 Ca1 B2 95.87(8) . . ?
O4 Ca1 B2 161.10(8) . . ?
O11 Ca1 B2 87.16(8) . . ?
O10 Ca1 B2 103.56(8) . . ?
O6 Ca1 B2 27.11(7) . . ?
O3 Ca1 B2 81.22(8) . . ?
O7 Ca1 B2 26.63(7) . . ?
B6 Ca1 B2 100.36(9) . . ?
B3 Ca1 B2 82.17(9) . . ?
O14 Ca1 Ca3 134.77(6) . . ?
O13 Ca1 Ca3 143.79(5) . . ?
O4 Ca1 Ca3 118.72(5) . . ?
O11 Ca1 Ca3 80.49(5) . . ?
O10 Ca1 Ca3 73.31(5) . . ?
O6 Ca1 Ca3 36.96(5) . . ?
O3 Ca1 Ca3 37.96(4) . . ?
O7 Ca1 Ca3 68.95(4) . . ?
B6 Ca1 Ca3 143.86(7) . . ?
B3 Ca1 Ca3 57.14(7) . . ?
B2 Ca1 Ca3 48.64(6) . . ?
O14 Ca1 H53 130.1 . . ?
O13 Ca1 H53 86.8 . . ?
O4 Ca1 H53 59.3 . . ?
O11 Ca1 H53 17.9 . . ?
O10 Ca1 H53 128.5 . . ?
O6 Ca1 H53 122.7 . . ?
O3 Ca1 H53 65.5 . . ?
O7 Ca1 H53 86.9 . . ?
B6 Ca1 H53 113.1 . . ?
B3 Ca1 H53 38.2 . . ?
B2 Ca1 H53 104.7 . . ?
Ca3 Ca1 H53 95.0 . . ?
O16 Ca2 O1 174.28(8) 2_766 . ?
O16 Ca2 O12 88.83(7) 2_766 . ?
O1 Ca2 O12 95.02(8) . . ?
O16 Ca2 O7 93.58(7) 2_766 2_766 ?
O1 Ca2 O7 87.19(7) . 2_766 ?
O12 Ca2 O7 130.01(8) . 2_766 ?
O16 Ca2 O15 91.52(7) 2_766 . ?
O1 Ca2 O15 84.84(7) . . ?
O12 Ca2 O15 82.01(7) . . ?
O7 Ca2 O15 147.61(7) 2_766 . ?
O16 Ca2 O8 75.97(7) 2_766 2_766 ?
O1 Ca2 O8 109.06(7) . 2_766 ?
O12 Ca2 O8 75.85(7) . 2_766 ?
O7 Ca2 O8 56.66(6) 2_766 2_766 ?
O15 Ca2 O8 154.64(7) . 2_766 ?
O16 Ca2 O13 93.16(7) 2_766 . ?
O1 Ca2 O13 81.18(7) . . ?
O12 Ca2 O13 140.45(8) . . ?
O7 Ca2 O13 89.31(7) 2_766 . ?
O15 Ca2 O13 58.46(7) . . ?
O8 Ca2 O13 142.68(7) 2_766 . ?
O16 Ca2 B6 91.63(9) 2_766 . ?
O1 Ca2 B6 83.03(9) . . ?
O12 Ca2 B6 111.46(9) . . ?
O7 Ca2 B6 118.35(8) 2_766 . ?
O15 Ca2 B6 29.45(8) . . ?
O8 Ca2 B6 165.73(8) 2_766 . ?
O13 Ca2 B6 29.04(8) . . ?
O16 Ca2 B2 87.36(8) 2_766 2_766 ?
O1 Ca2 B2 95.91(8) . 2_766 ?
O12 Ca2 B2 102.46(9) . 2_766 ?
O7 Ca2 B2 28.17(8) 2_766 2_766 ?
O15 Ca2 B2 175.36(8) . 2_766 ?
O8 Ca2 B2 28.84(8) 2_766 2_766 ?
O13 Ca2 B2 117.09(8) . 2_766 ?
B6 Ca2 B2 146.04(9) . 2_766 ?
O16 Ca2 O11 47.67(6) 2_766 2_766 ?
O1 Ca2 O11 128.20(7) . 2_766 ?
O12 Ca2 O11 136.46(7) . 2_766 ?
O7 Ca2 O11 65.69(6) 2_766 2_766 ?
O15 Ca2 O11 95.42(6) . 2_766 ?
O8 Ca2 O11 92.22(6) 2_766 2_766 ?
O13 Ca2 O11 56.71(6) . 2_766 ?
B6 Ca2 O11 74.00(8) . 2_766 ?
B2 Ca2 O11 80.50(8) 2_766 2_766 ?
O16 Ca2 Ca3 46.56(5) 2_766 2_766 ?
O1 Ca2 Ca3 138.10(6) . 2_766 ?
O12 Ca2 Ca3 82.97(6) . 2_766 ?
O7 Ca2 Ca3 64.14(5) 2_766 2_766 ?
O15 Ca2 Ca3 135.55(5) . 2_766 ?
O8 Ca2 Ca3 29.81(5) 2_766 2_766 ?
O13 Ca2 Ca3 125.28(5) . 2_766 ?
B6 Ca2 Ca3 136.65(7) . 2_766 ?
B2 Ca2 Ca3 44.91(7) 2_766 2_766 ?
O11 Ca2 Ca3 68.67(4) 2_766 2_766 ?
O16 Ca2 Ca1 63.13(5) 2_766 2_766 ?
O1 Ca2 Ca1 115.91(5) . 2_766 ?
O12 Ca2 Ca1 136.83(6) . 2_766 ?
O7 Ca2 Ca1 34.10(5) 2_766 2_766 ?
O15 Ca2 Ca1 127.59(5) . 2_766 ?
O8 Ca2 Ca1 66.25(5) 2_766 2_766 ?
O13 Ca2 Ca1 76.92(5) . 2_766 ?
B6 Ca2 Ca1 102.01(7) . 2_766 ?
B2 Ca2 Ca1 48.05(7) 2_766 2_766 ?
O11 Ca2 Ca1 33.20(4) 2_766 2_766 ?
Ca3 Ca2 Ca1 53.868(13) 2_766 2_766 ?
O16 Ca2 H25 163.3 2_766 . ?
O1 Ca2 H25 14.5 . . ?
O12 Ca2 H25 86.6 . . ?
O7 Ca2 H25 101.7 2_766 . ?
O15 Ca2 H25 71.9 . . ?
O8 Ca2 H25 118.3 2_766 . ?
O13 Ca2 H25 80.3 . . ?
B6 Ca2 H25 75.2 . . ?
B2 Ca2 H25 109.3 2_766 . ?
O11 Ca2 H25 134.1 2_766 . ?
Ca3 Ca2 H25 148.1 2_766 . ?
Ca1 Ca2 H25 129.0 2_766 . ?
O16 Ca2 H47 76.6 2_766 . ?
O1 Ca2 H47 97.9 . . ?
O12 Ca2 H47 145.6 . . ?
O7 Ca2 H47 82.4 2_766 . ?
O15 Ca2 H47 67.7 . . ?
O8 Ca2 H47 128.2 2_766 . ?
O13 Ca2 H47 18.5 . . ?
B6 Ca2 H47 39.8 . . ?
B2 Ca2 H47 107.6 2_766 . ?
O11 Ca2 H47 38.4 2_766 . ?
Ca3 Ca2 H47 107.1 2_766 . ?
Ca1 Ca2 H47 62.3 2_766 . ?
H25 Ca2 H47 98.5 . . ?
O5 Ca3 O20 97.69(8) . . ?
O5 Ca3 O18 76.79(7) . . ?
O20 Ca3 O18 87.68(7) . . ?
O5 Ca3 O2 56.57(7) . . ?
O20 Ca3 O2 98.96(7) . . ?
O18 Ca3 O2 133.34(7) . . ?
O5 Ca3 O6 154.61(7) . . ?
O20 Ca3 O6 93.46(7) . . ?
O18 Ca3 O6 80.97(7) . . ?
O2 Ca3 O6 143.57(7) . . ?
O5 Ca3 O8 143.61(7) . . ?
O20 Ca3 O8 85.23(7) . . ?
O18 Ca3 O8 139.57(7) . . ?
O2 Ca3 O8 87.09(7) . . ?
O6 Ca3 O8 59.87(6) . . ?
O5 Ca3 O3 87.54(7) . . ?
O20 Ca3 O3 168.20(7) . . ?
O18 Ca3 O3 83.21(7) . . ?
O2 Ca3 O3 92.76(7) . . ?
O6 Ca3 O3 77.74(7) . . ?
O8 Ca3 O3 96.86(7) . . ?
O5 Ca3 B2 170.58(9) . . ?
O20 Ca3 B2 88.44(9) . . ?
O18 Ca3 B2 110.75(8) . . ?
O2 Ca3 B2 115.53(8) . . ?
O6 Ca3 B2 30.44(8) . . ?
O8 Ca3 B2 29.45(8) . . ?
O3 Ca3 B2 87.79(8) . . ?
O5 Ca3 B1 27.73(8) . . ?
O20 Ca3 B1 96.03(9) . . ?
O18 Ca3 B1 104.37(8) . . ?
O2 Ca3 B1 29.22(8) . . ?
O6 Ca3 B1 169.27(9) . . ?
O8 Ca3 B1 115.93(8) . . ?
O3 Ca3 B1 93.50(8) . . ?
B2 Ca3 B1 144.75(9) . . ?
O5 Ca3 Ca1 124.15(5) . . ?
O20 Ca3 Ca1 131.11(6) . . ?
O18 Ca3 Ca1 79.63(5) . . ?
O2 Ca3 Ca1 123.85(5) . . ?
O6 Ca3 Ca1 38.13(5) . . ?
O8 Ca3 Ca1 75.55(5) . . ?
O3 Ca3 Ca1 39.61(5) . . ?
B2 Ca3 Ca1 54.17(7) . . ?
B1 Ca3 Ca1 132.84(7) . . ?
O5 Ca3 Ca2 124.73(5) . 2_766 ?
O20 Ca3 Ca2 113.87(5) . 2_766 ?
O18 Ca3 Ca2 144.00(5) . 2_766 ?
O2 Ca3 Ca2 73.91(5) . 2_766 ?
O6 Ca3 Ca2 69.74(5) . 2_766 ?
O8 Ca3 Ca2 30.26(5) . 2_766 ?
O3 Ca3 Ca2 70.73(5) . 2_766 ?
B2 Ca3 Ca2 45.88(7) . 2_766 ?
B1 Ca3 Ca2 101.68(7) . 2_766 ?
Ca1 Ca3 Ca2 64.426(15) . 2_766 ?
O5 Ca3 H44 138.7 . . ?
O20 Ca3 H44 69.4 . . ?
O18 Ca3 H44 138.2 . . ?
O2 Ca3 H44 85.9 . . ?
O6 Ca3 H44 66.7 . . ?
O8 Ca3 H44 16.3 . . ?
O3 Ca3 H44 113.2 . . ?
B2 Ca3 H44 37.8 . . ?
B1 Ca3 H44 112.2 . . ?
Ca1 Ca3 H44 89.6 . . ?
Ca2 Ca3 H44 44.8 2_766 . ?
B4 O1 Ca2 134.95(18) . . ?
B4 O1 H25 107.6 . . ?
Ca2 O1 H25 112.7 . . ?
B1 O2 Ca3 98.05(16) . . ?
B1 O2 H21 115.9 . . ?
Ca3 O2 H21 135.0 . . ?
C4 O3 B3 110.4(2) . . ?
C4 O3 Ca3 115.99(16) . . ?
B3 O3 Ca3 114.92(17) . . ?
C4 O3 Ca1 116.69(16) . . ?
B3 O3 Ca1 94.44(16) . . ?
Ca3 O3 Ca1 102.43(7) . . ?
B4 O4 Ca1 125.06(17) . . ?
B4 O4 H26 103.4 . . ?
Ca1 O4 H26 110.8 . . ?
B1 O5 Ca3 104.93(17) . . ?
B1 O5 H40 122.9 . . ?
Ca3 O5 H40 128.7 . . ?
C16 O6 B2 110.7(2) . . ?
C16 O6 Ca3 117.91(17) . . ?
B2 O6 Ca3 96.06(16) . . ?
C16 O6 Ca1 119.25(17) . . ?
B2 O6 Ca1 104.94(17) . . ?
Ca3 O6 Ca1 104.90(7) . . ?
B2 O7 Ca2 100.38(17) . 2_766 ?
B2 O7 Ca1 97.32(16) . . ?
Ca2 O7 Ca1 115.78(8) 2_766 . ?
B2 O7 H45 113.5 . . ?
Ca2 O7 H45 92.6 2_766 . ?
Ca1 O7 H45 133.6 . . ?
B2 O8 Ca3 96.76(16) . . ?
B2 O8 Ca2 97.82(16) . 2_766 ?
Ca3 O8 Ca2 119.93(8) . 2_766 ?
B2 O8 H44 106.9 . . ?
Ca3 O8 H44 103.5 . . ?
Ca2 O8 H44 126.6 2_766 . ?
C21 O9 B1 111.9(2) . . ?
Ca1 O10 H51 127.9 . . ?
Ca1 O10 H52 112.5 . . ?
H51 O10 H52 98.3 . . ?
B3 O11 Ca1 101.21(17) . . ?
B3 O11 Ca2 86.10(17) . 2_766 ?
Ca1 O11 Ca2 103.21(7) . 2_766 ?
B3 O11 H53 112.8 . . ?
Ca1 O11 H53 92.4 . . ?
Ca2 O11 H53 152.9 2_766 . ?
Ca2 O12 H37 111.1 . . ?
Ca2 O12 H49 127.9 . . ?
H37 O12 H49 120.3 . . ?
B6 O13 Ca1 98.45(17) . . ?
B6 O13 Ca2 96.75(17) . . ?
Ca1 O13 Ca2 131.08(9) . . ?
B6 O13 H47 112.9 . . ?
Ca1 O13 H47 122.3 . . ?
Ca2 O13 H47 93.0 . . ?
B6 O14 Ca1 102.78(17) . . ?
B6 O14 H30 118.4 . . ?
Ca1 O14 H30 138.3 . . ?
C25 O15 B6 111.8(2) . . ?
C25 O15 Ca2 117.80(17) . . ?
B6 O15 Ca2 98.43(17) . . ?
B3 O16 Ca2 121.82(18) . 2_766 ?
B3 O16 H50 113.9 . . ?
Ca2 O16 H50 122.8 2_766 . ?
C10 O17 B4 112.2(2) . . ?
Ca3 O18 H17 122.2 . . ?
B5 O19 C34 110.4(2) . . ?
B5 O20 Ca3 131.2(2) . . ?
C37 C1 C8 120.4(3) . . ?
C37 C1 H4 119.8 . . ?
C8 C1 H4 119.8 . . ?
C14 C2 C8 122.2(3) . . ?
C14 C2 C10 126.3(3) . . ?
C8 C2 C10 111.4(3) . . ?
C33 C3 C13 122.4(3) . . ?
C33 C3 C16 126.3(3) . . ?
C13 C3 C16 111.2(3) . . ?
O3 C4 C5 106.9(2) . . ?
O3 C4 H1 110.3 . . ?
C5 C4 H1 110.3 . . ?
O3 C4 H2 110.3 . . ?
C5 C4 H2 110.3 . . ?
H1 C4 H2 108.6 . . ?
C9 C5 C7 121.5(3) . . ?
C9 C5 C4 126.8(3) . . ?
C7 C5 C4 111.7(3) . . ?
C7 C6 C12 120.4(3) . . ?
C7 C6 H22 119.8 . . ?
C12 C6 H22 119.8 . . ?
C6 C7 C5 118.7(3) . . ?
C6 C7 B3 132.2(3) . . ?
C5 C7 B3 109.0(3) . . ?
C2 C8 C1 117.6(3) . . ?
C2 C8 B4 108.4(3) . . ?
C1 C8 B4 133.8(3) . . ?
C11 C9 C5 118.3(3) . . ?
C11 C9 H28 120.8 . . ?
C5 C9 H28 120.8 . . ?
O17 C10 C2 106.2(2) . . ?
O17 C10 H3 110.5 . . ?
C2 C10 H3 110.5 . . ?
O17 C10 H5 110.5 . . ?
C2 C10 H5 110.5 . . ?
H3 C10 H5 108.7 . . ?
C9 C11 C12 121.0(3) . . ?
C9 C11 H41 119.5 . . ?
C12 C11 H41 119.5 . . ?
C11 C12 C6 120.0(3) . . ?
C11 C12 H36 120.0 . . ?
C6 C12 H36 120.0 . . ?
C3 C13 C24 117.8(3) . . ?
C3 C13 B2 109.0(3) . . ?
C24 C13 B2 133.0(3) . . ?
C15 C14 C2 118.9(3) . . ?
C15 C14 H18 120.6 . . ?
C2 C14 H18 120.6 . . ?
C37 C15 C14 120.3(3) . . ?
C37 C15 H33 119.8 . . ?
C14 C15 H33 119.8 . . ?
O6 C16 C3 106.9(2) . . ?
O6 C16 H6 110.3 . . ?
C3 C16 H6 110.3 . . ?
O6 C16 H48 110.3 . . ?
C3 C16 H48 110.3 . . ?
H6 C16 H48 108.6 . . ?
C38 C19 C20 121.8(3) . . ?
C38 C19 C21 127.0(3) . . ?
C20 C19 C21 111.2(3) . . ?
C30 C20 C19 118.3(3) . . ?
C30 C20 B1 133.5(3) . . ?
C19 C20 B1 108.2(3) . . ?
O9 C21 C19 106.8(2) . . ?
O9 C21 H15 110.4 . . ?
C19 C21 H15 110.4 . . ?
O9 C21 H16 110.4 . . ?
C19 C21 H16 110.4 . . ?
H15 C21 H16 108.6 . . ?
C27 C22 C28 118.2(3) . . ?
C27 C22 B5 106.8(3) . . ?
C28 C22 B5 135.0(3) . . ?
C41 C23 C35 122.2(3) . . ?
C41 C23 C25 127.1(3) . . ?
C35 C23 C25 110.6(3) . . ?
C31 C24 C13 120.2(3) . . ?
C31 C24 H8 119.9 . . ?
C13 C24 H8 119.9 . . ?
O15 C25 C23 106.7(2) . . ?
O15 C25 H7 110.4 . . ?
C23 C25 H7 110.4 . . ?
O15 C25 H12 110.4 . . ?
C23 C25 H12 110.4 . . ?
H7 C25 H12 108.6 . . ?
C28 C26 C32 120.6(3) . . ?
C28 C26 H11 119.7 . . ?
C32 C26 H11 119.7 . . ?
C29 C27 C22 121.8(3) . . ?
C29 C27 C34 127.8(3) . . ?
C22 C27 C34 110.4(3) . . ?
C26 C28 C22 120.1(3) . . ?
C26 C28 H39 119.9 . . ?
C22 C28 H39 119.9 . . ?
C32 C29 C27 119.1(3) . . ?
C32 C29 H38 120.5 . . ?
C27 C29 H38 120.5 . . ?
C20 C30 C42 120.3(3) . . ?
C20 C30 H43 119.9 . . ?
C42 C30 H43 119.9 . . ?
C24 C31 C44 120.9(3) . . ?
C24 C31 H23 119.5 . . ?
C44 C31 H23 119.5 . . ?
C29 C32 C26 120.2(3) . . ?
C29 C32 H29 119.9 . . ?
C26 C32 H29 119.9 . . ?
C44 C33 C3 118.4(3) . . ?
C44 C33 H34 120.8 . . ?
C3 C33 H34 120.8 . . ?
O19 C34 C27 106.5(2) . . ?
O19 C34 H13 110.4 . . ?
C27 C34 H13 110.4 . . ?
O19 C34 H31 110.4 . . ?
C27 C34 H31 110.4 . . ?
H13 C34 H31 108.6 . . ?
C36 C35 C23 117.5(3) . . ?
C36 C35 B6 133.2(3) . . ?
C23 C35 B6 109.2(3) . . ?
C39 C36 C35 120.6(3) . . ?
C39 C36 H9 119.7 . . ?
C35 C36 H9 119.7 . . ?
C15 C37 C1 120.5(3) . . ?
C15 C37 H42 119.8 . . ?
C1 C37 H42 119.8 . . ?
C40 C38 C19 118.7(3) . . ?
C40 C38 H14 120.6 . . ?
C19 C38 H14 120.6 . . ?
C43 C39 C36 120.5(3) . . ?
C43 C39 H19 119.7 . . ?
C36 C39 H19 119.7 . . ?
C38 C40 C42 120.3(3) . . ?
C38 C40 H27 119.8 . . ?
C42 C40 H27 119.8 . . ?
C23 C41 C43 119.0(3) . . ?
C23 C41 H20 120.5 . . ?
C43 C41 H20 120.5 . . ?
C30 C42 C40 120.5(3) . . ?
C30 C42 H35 119.7 . . ?
C40 C42 H35 119.7 . . ?
C39 C43 C41 120.1(3) . . ?
C39 C43 H24 119.9 . . ?
C41 C43 H24 119.9 . . ?
C31 C44 C33 120.3(3) . . ?
C31 C44 H10 119.9 . . ?
C33 C44 H10 119.9 . . ?
O5 B1 O2 99.2(2) . . ?
O5 B1 O9 110.6(3) . . ?
O2 B1 O9 108.9(2) . . ?
O5 B1 C20 118.4(3) . . ?
O2 B1 C20 118.1(3) . . ?
O9 B1 C20 101.5(2) . . ?
O5 B1 Ca3 47.34(13) . . ?
O2 B1 Ca3 52.73(13) . . ?
O9 B1 Ca3 114.00(19) . . ?
C20 B1 Ca3 144.4(2) . . ?
O7 B2 O8 104.0(2) . . ?
O7 B2 O6 103.8(2) . . ?
O8 B2 O6 107.3(2) . . ?
O7 B2 C13 122.9(3) . . ?
O8 B2 C13 115.4(3) . . ?
O6 B2 C13 102.0(2) . . ?
O7 B2 Ca3 115.6(2) . . ?
O8 B2 Ca3 53.79(13) . . ?
O6 B2 Ca3 53.50(13) . . ?
C13 B2 Ca3 120.7(2) . . ?
O7 B2 Ca2 51.45(14) . 2_766 ?
O8 B2 Ca2 53.35(13) . 2_766 ?
O6 B2 Ca2 123.6(2) . 2_766 ?
C13 B2 Ca2 134.4(2) . 2_766 ?
Ca3 B2 Ca2 89.21(10) . 2_766 ?
O7 B2 Ca1 56.05(14) . . ?
O8 B2 Ca1 112.49(19) . . ?
O6 B2 Ca1 47.94(13) . . ?
C13 B2 Ca1 129.6(2) . . ?
Ca3 B2 Ca1 77.19(8) . . ?
Ca2 B2 Ca1 87.50(9) 2_766 . ?
O11 B3 O16 103.6(2) . . ?
O11 B3 O3 106.4(2) . . ?
O16 B3 O3 107.7(2) . . ?
O11 B3 C7 117.3(3) . . ?
O16 B3 C7 119.4(3) . . ?
O3 B3 C7 101.4(2) . . ?
O11 B3 Ca1 51.17(13) . . ?
O16 B3 Ca1 113.4(2) . . ?
O3 B3 Ca1 55.38(13) . . ?
C7 B3 Ca1 126.9(2) . . ?
O1 B4 O17 106.3(2) . . ?
O1 B4 O4 105.6(2) . . ?
O17 B4 O4 110.4(2) . . ?
O1 B4 C8 120.3(3) . . ?
O17 B4 C8 101.8(2) . . ?
O4 B4 C8 112.2(3) . . ?
O20 B5 O19 120.4(3) . . ?
O20 B5 C22 133.8(3) . . ?
O19 B5 C22 105.8(3) . . ?
O14 B6 O13 99.6(2) . . ?
O14 B6 O15 111.4(2) . . ?
O13 B6 O15 106.2(2) . . ?
O14 B6 C35 117.6(3) . . ?
O13 B6 C35 120.3(3) . . ?
O15 B6 C35 101.4(2) . . ?
O14 B6 Ca1 49.17(14) . . ?
O13 B6 Ca1 52.34(14) . . ?
O15 B6 Ca1 131.5(2) . . ?
C35 B6 Ca1 127.1(2) . . ?
O14 B6 Ca2 119.0(2) . . ?
O13 B6 Ca2 54.20(14) . . ?
O15 B6 Ca2 52.12(14) . . ?
C35 B6 Ca2 123.2(2) . . ?
Ca1 B6 Ca2 94.78(10) . . ?
 
loop_
 _geom_torsion_atom_site_label_1
 _geom_torsion_atom_site_label_2
 _geom_torsion_atom_site_label_3
 _geom_torsion_atom_site_label_4
 _geom_torsion
 _geom_torsion_site_symmetry_1
 _geom_torsion_site_symmetry_2
 _geom_torsion_site_symmetry_3
 _geom_torsion_site_symmetry_4
 _geom_torsion_publ_flag
B3 O3 C4 C5 -3.0(3) . . . . ?
Ca3 O3 C4 C5 129.87(19) . . . . ?
Ca1 O3 C4 C5 -109.3(2) . . . . ?
O3 C4 C5 C9 -179.9(3) . . . . ?
O3 C4 C5 C7 -2.5(3) . . . . ?
C12 C6 C7 C5 -2.1(5) . . . . ?
C12 C6 C7 B3 175.7(3) . . . . ?
C9 C5 C7 C6 2.7(5) . . . . ?
C4 C5 C7 C6 -174.9(3) . . . . ?
C9 C5 C7 B3 -175.6(3) . . . . ?
C4 C5 C7 B3 6.8(4) . . . . ?
C14 C2 C8 C1 -2.6(5) . . . . ?
C10 C2 C8 C1 174.2(3) . . . . ?
C14 C2 C8 B4 -178.0(3) . . . . ?
C10 C2 C8 B4 -1.2(4) . . . . ?
C37 C1 C8 C2 0.8(5) . . . . ?
C37 C1 C8 B4 174.8(3) . . . . ?
C7 C5 C9 C11 -1.4(5) . . . . ?
C4 C5 C9 C11 175.7(3) . . . . ?
B4 O17 C10 C2 -3.2(3) . . . . ?
C14 C2 C10 O17 179.4(3) . . . . ?
C8 C2 C10 O17 2.7(3) . . . . ?
C5 C9 C11 C12 -0.4(5) . . . . ?
C9 C11 C12 C6 1.0(6) . . . . ?
C7 C6 C12 C11 0.3(5) . . . . ?
C33 C3 C13 C24 -0.6(5) . . . . ?
C16 C3 C13 C24 176.7(3) . . . . ?
C33 C3 C13 B2 -176.4(3) . . . . ?
C16 C3 C13 B2 0.9(4) . . . . ?
C8 C2 C14 C15 2.5(5) . . . . ?
C10 C2 C14 C15 -173.8(3) . . . . ?
C2 C14 C15 C37 -0.5(5) . . . . ?
B2 O6 C16 C3 4.1(3) . . . . ?
Ca3 O6 C16 C3 -105.1(2) . . . . ?
Ca1 O6 C16 C3 125.9(2) . . . . ?
C33 C3 C16 O6 174.1(3) . . . . ?
C13 C3 C16 O6 -3.1(4) . . . . ?
C38 C19 C20 C30 2.0(4) . . . . ?
C21 C19 C20 C30 -177.6(3) . . . . ?
C38 C19 C20 B1 -177.3(3) . . . . ?
C21 C19 C20 B1 3.1(3) . . . . ?
B1 O9 C21 C19 6.0(3) . . . . ?
C38 C19 C21 O9 174.7(3) . . . . ?
C20 C19 C21 O9 -5.6(3) . . . . ?
C3 C13 C24 C31 0.7(5) . . . . ?
B2 C13 C24 C31 175.3(3) . . . . ?
B6 O15 C25 C23 2.0(3) . . . . ?
Ca2 O15 C25 C23 114.9(2) . . . . ?
C41 C23 C25 O15 176.6(3) . . . . ?
C35 C23 C25 O15 -4.9(3) . . . . ?
C28 C22 C27 C29 1.6(5) . . . . ?
B5 C22 C27 C29 -176.8(3) . . . . ?
C28 C22 C27 C34 -180.0(3) . . . . ?
B5 C22 C27 C34 1.7(4) . . . . ?
C32 C26 C28 C22 0.5(5) . . . . ?
C27 C22 C28 C26 -1.2(5) . . . . ?
B5 C22 C28 C26 176.6(3) . . . . ?
C22 C27 C29 C32 -1.2(5) . . . . ?
C34 C27 C29 C32 -179.4(3) . . . . ?
C19 C20 C30 C42 -2.5(4) . . . . ?
B1 C20 C30 C42 176.6(3) . . . . ?
C13 C24 C31 C44 -0.1(5) . . . . ?
C27 C29 C32 C26 0.5(5) . . . . ?
C28 C26 C32 C29 -0.1(5) . . . . ?
C13 C3 C33 C44 -0.2(5) . . . . ?
C16 C3 C33 C44 -177.1(3) . . . . ?
B5 O19 C34 C27 -2.0(3) . . . . ?
C29 C27 C34 O19 178.4(3) . . . . ?
C22 C27 C34 O19 0.0(4) . . . . ?
C41 C23 C35 C36 1.7(5) . . . . ?
C25 C23 C35 C36 -176.9(3) . . . . ?
C41 C23 C35 B6 -175.7(3) . . . . ?
C25 C23 C35 B6 5.7(3) . . . . ?
C23 C35 C36 C39 -0.7(5) . . . . ?
B6 C35 C36 C39 175.9(3) . . . . ?
C14 C15 C37 C1 -1.2(5) . . . . ?
C8 C1 C37 C15 1.0(5) . . . . ?
C20 C19 C38 C40 -0.1(5) . . . . ?
C21 C19 C38 C40 179.6(3) . . . . ?
C35 C36 C39 C43 -1.1(5) . . . . ?
C19 C38 C40 C42 -1.5(5) . . . . ?
C35 C23 C41 C43 -0.7(5) . . . . ?
C25 C23 C41 C43 177.5(3) . . . . ?
C20 C30 C42 C40 1.0(5) . . . . ?
C38 C40 C42 C30 1.1(5) . . . . ?
C36 C39 C43 C41 2.1(5) . . . . ?
C23 C41 C43 C39 -1.1(5) . . . . ?
C24 C31 C44 C33 -0.7(5) . . . . ?
C3 C33 C44 C31 0.8(5) . . . . ?
Ca3 O5 B1 O2 10.2(2) . . . . ?
Ca3 O5 B1 O9 -104.2(2) . . . . ?
Ca3 O5 B1 C20 139.3(2) . . . . ?
Ca3 O2 B1 O5 -9.4(2) . . . . ?
Ca3 O2 B1 O9 106.2(2) . . . . ?
Ca3 O2 B1 C20 -138.8(2) . . . . ?
C21 O9 B1 O5 -130.6(3) . . . . ?
C21 O9 B1 O2 121.3(3) . . . . ?
C21 O9 B1 C20 -4.1(3) . . . . ?
C21 O9 B1 Ca3 178.07(18) . . . . ?
C30 C20 B1 O5 -57.4(5) . . . . ?
C19 C20 B1 O5 121.7(3) . . . . ?
C30 C20 B1 O2 62.4(4) . . . . ?
C19 C20 B1 O2 -118.5(3) . . . . ?
C30 C20 B1 O9 -178.7(3) . . . . ?
C19 C20 B1 O9 0.5(3) . . . . ?
C30 C20 B1 Ca3 -2.0(6) . . . . ?
C19 C20 B1 Ca3 177.2(3) . . . . ?
Ca2 O7 B2 O8 10.1(2) 2_766 . . . ?
Ca1 O7 B2 O8 -107.93(19) . . . . ?
Ca2 O7 B2 O6 122.14(19) 2_766 . . . ?
Ca1 O7 B2 O6 4.2(2) . . . . ?
Ca2 O7 B2 C13 -123.4(3) 2_766 . . . ?
Ca1 O7 B2 C13 118.7(3) . . . . ?
Ca2 O7 B2 Ca3 66.29(17) 2_766 . . . ?
Ca1 O7 B2 Ca3 -51.70(17) . . . . ?
Ca1 O7 B2 Ca2 -117.99(11) . . . 2_766 ?
Ca2 O7 B2 Ca1 117.99(11) 2_766 . . . ?
Ca3 O8 B2 O7 111.76(19) . . . . ?
Ca2 O8 B2 O7 -9.8(2) 2_766 . . . ?
Ca3 O8 B2 O6 2.2(2) . . . . ?
Ca2 O8 B2 O6 -119.4(2) 2_766 . . . ?
Ca3 O8 B2 C13 -110.7(2) . . . . ?
Ca2 O8 B2 C13 127.7(2) 2_766 . . . ?
Ca2 O8 B2 Ca3 -121.56(10) 2_766 . . . ?
Ca3 O8 B2 Ca2 121.56(10) . . . 2_766 ?
Ca3 O8 B2 Ca1 53.09(15) . . . . ?
Ca2 O8 B2 Ca1 -68.48(15) 2_766 . . . ?
C16 O6 B2 O7 125.2(3) . . . . ?
Ca3 O6 B2 O7 -111.9(2) . . . . ?
Ca1 O6 B2 O7 -4.6(2) . . . . ?
C16 O6 B2 O8 -125.1(3) . . . . ?
Ca3 O6 B2 O8 -2.2(2) . . . . ?
Ca1 O6 B2 O8 105.0(2) . . . . ?
C16 O6 B2 C13 -3.4(3) . . . . ?
Ca3 O6 B2 C13 119.49(19) . . . . ?
Ca1 O6 B2 C13 -133.29(18) . . . . ?
C16 O6 B2 Ca3 -122.9(2) . . . . ?
Ca1 O6 B2 Ca3 107.22(11) . . . . ?
C16 O6 B2 Ca2 177.87(19) . . . 2_766 ?
Ca3 O6 B2 Ca2 -59.2(2) . . . 2_766 ?
Ca1 O6 B2 Ca2 48.0(2) . . . 2_766 ?
C16 O6 B2 Ca1 129.9(2) . . . . ?
Ca3 O6 B2 Ca1 -107.22(11) . . . . ?
C3 C13 B2 O7 -113.9(3) . . . . ?
C24 C13 B2 O7 71.1(5) . . . . ?
C3 C13 B2 O8 117.3(3) . . . . ?
C24 C13 B2 O8 -57.6(5) . . . . ?
C3 C13 B2 O6 1.5(3) . . . . ?
C24 C13 B2 O6 -173.5(3) . . . . ?
C3 C13 B2 Ca3 55.9(3) . . . . ?
C24 C13 B2 Ca3 -119.0(3) . . . . ?
C3 C13 B2 Ca2 180.0(2) . . . 2_766 ?
C24 C13 B2 Ca2 5.0(5) . . . 2_766 ?
C3 C13 B2 Ca1 -43.1(3) . . . . ?
C24 C13 B2 Ca1 142.0(3) . . . . ?
Ca1 O11 B3 O16 109.2(2) . . . . ?
Ca2 O11 B3 O16 6.49(19) 2_766 . . . ?
Ca1 O11 B3 O3 -4.2(2) . . . . ?
Ca2 O11 B3 O3 -106.9(2) 2_766 . . . ?
Ca1 O11 B3 C7 -116.9(2) . . . . ?
Ca2 O11 B3 C7 140.4(2) 2_766 . . . ?
Ca2 O11 B3 Ca1 -102.71(8) 2_766 . . . ?
Ca2 O16 B3 O11 -10.2(3) 2_766 . . . ?
Ca2 O16 B3 O3 102.3(2) 2_766 . . . ?
Ca2 O16 B3 C7 -142.9(2) 2_766 . . . ?
Ca2 O16 B3 Ca1 43.1(2) 2_766 . . . ?
C4 O3 B3 O11 -116.6(2) . . . . ?
Ca3 O3 B3 O11 109.9(2) . . . . ?
Ca1 O3 B3 O11 4.0(2) . . . . ?
C4 O3 B3 O16 132.8(2) . . . . ?
Ca3 O3 B3 O16 -0.7(3) . . . . ?
Ca1 O3 B3 O16 -106.6(2) . . . . ?
C4 O3 B3 C7 6.6(3) . . . . ?
Ca3 O3 B3 C7 -126.89(19) . . . . ?
Ca1 O3 B3 C7 127.20(19) . . . . ?
C4 O3 B3 Ca1 -120.6(2) . . . . ?
Ca3 O3 B3 Ca1 105.91(13) . . . . ?
C6 C7 B3 O11 -70.6(4) . . . . ?
C5 C7 B3 O11 107.4(3) . . . . ?
C6 C7 B3 O16 55.9(5) . . . . ?
C5 C7 B3 O16 -126.0(3) . . . . ?
C6 C7 B3 O3 174.0(3) . . . . ?
C5 C7 B3 O3 -8.0(3) . . . . ?
C6 C7 B3 Ca1 -131.0(3) . . . . ?
C5 C7 B3 Ca1 47.1(3) . . . . ?
Ca2 O1 B4 O17 20.2(4) . . . . ?
Ca2 O1 B4 O4 -97.1(3) . . . . ?
Ca2 O1 B4 C8 134.8(2) . . . . ?
C10 O17 B4 O1 129.1(2) . . . . ?
C10 O17 B4 O4 -116.9(3) . . . . ?
C10 O17 B4 C8 2.4(3) . . . . ?
Ca1 O4 B4 O1 63.6(3) . . . . ?
Ca1 O4 B4 O17 -50.9(3) . . . . ?
Ca1 O4 B4 C8 -163.65(18) . . . . ?
C2 C8 B4 O1 -117.6(3) . . . . ?
C1 C8 B4 O1 68.1(5) . . . . ?
C2 C8 B4 O17 -0.7(3) . . . . ?
C1 C8 B4 O17 -175.0(3) . . . . ?
C2 C8 B4 O4 117.4(3) . . . . ?
C1 C8 B4 O4 -57.0(5) . . . . ?
Ca3 O20 B5 O19 41.2(4) . . . . ?
Ca3 O20 B5 C22 -137.9(3) . . . . ?
C34 O19 B5 O20 -176.4(3) . . . . ?
C34 O19 B5 C22 2.9(3) . . . . ?
C27 C22 B5 O20 176.4(4) . . . . ?
C28 C22 B5 O20 -1.5(6) . . . . ?
C27 C22 B5 O19 -2.8(3) . . . . ?
C28 C22 B5 O19 179.3(3) . . . . ?
Ca1 O14 B6 O13 -15.1(2) . . . . ?
Ca1 O14 B6 O15 -126.9(2) . . . . ?
Ca1 O14 B6 C35 116.6(2) . . . . ?
Ca1 O14 B6 Ca2 -69.38(19) . . . . ?
Ca1 O13 B6 O14 14.4(2) . . . . ?
Ca2 O13 B6 O14 -118.90(19) . . . . ?
Ca1 O13 B6 O15 130.3(2) . . . . ?
Ca2 O13 B6 O15 -3.1(2) . . . . ?
Ca1 O13 B6 C35 -115.5(3) . . . . ?
Ca2 O13 B6 C35 111.1(3) . . . . ?
Ca2 O13 B6 Ca1 -133.35(11) . . . . ?
Ca1 O13 B6 Ca2 133.35(11) . . . . ?
C25 O15 B6 O14 -124.8(3) . . . . ?
Ca2 O15 B6 O14 110.7(2) . . . . ?
C25 O15 B6 O13 127.7(2) . . . . ?
Ca2 O15 B6 O13 3.2(2) . . . . ?
C25 O15 B6 C35 1.2(3) . . . . ?
Ca2 O15 B6 C35 -123.38(19) . . . . ?
C25 O15 B6 Ca1 -178.6(2) . . . . ?
Ca2 O15 B6 Ca1 56.9(2) . . . . ?
C25 O15 B6 Ca2 124.5(2) . . . . ?
C36 C35 B6 O14 -59.3(5) . . . . ?
C23 C35 B6 O14 117.5(3) . . . . ?
C36 C35 B6 O13 62.3(5) . . . . ?
C23 C35 B6 O13 -120.9(3) . . . . ?
C36 C35 B6 O15 179.0(3) . . . . ?
C23 C35 B6 O15 -4.2(3) . . . . ?
C36 C35 B6 Ca1 -1.3(5) . . . . ?
C23 C35 B6 Ca1 175.5(2) . . . . ?
C36 C35 B6 Ca2 127.0(3) . . . . ?
C23 C35 B6 Ca2 -56.2(3) . . . . ?
 
_refine_diff_density_max    0.648
_refine_diff_density_min   -0.378
_refine_diff_density_rms    0.080

_shelxl_version_number 2014/6

_shelx_res_file
;
TITL MAP_07 in P-1               New: P-1
CELL  0.71073   10.4309   14.5330   16.1153    98.105    98.045   101.478
ZERR  2           0.0003    0.0004    0.0005     0.003     0.002     0.002
LATT   1
SFAC  C  H  B Ca  O
UNIT    84  102  12   6  40
L.S. 10
FMAP 2
PLAN -20
ACTA
BOND $H
CONF
WGHT    0.029000    0.000000    0.000000    0.000000    0.000000    1.000000
FVAR       0.98758
CA1   4    0.723836    0.399652    0.499382    11.00000    0.01237    0.01091 =
         0.01817    0.00359    0.00192    0.00323
CA2   4    0.909853    0.706006    0.496998    11.00000    0.01106    0.01326 =
         0.01973    0.00538    0.00265    0.00105
CA3   4    0.703831    0.128657    0.509317    11.00000    0.01325    0.01024 =
         0.01690    0.00305    0.00341    0.00190
O1    5    0.779050    0.661491    0.600678    11.00000    0.01573    0.01929 =
         0.01938    0.00672    0.00537    0.00366
AFIX   3
H25   2    0.707430    0.662360    0.587920    11.00000   -1.50000
AFIX   0
O2    5    0.859976    0.070897    0.605319    11.00000    0.01328    0.01771 =
         0.02055    0.00595    0.00543    0.00375
AFIX   3
H21   2    0.928976    0.045807    0.599912    11.00000   -1.50000
AFIX   0
O3    5    0.741344    0.284101    0.604837    11.00000    0.00950    0.01456 =
         0.01690    0.00202    0.00361   -0.00010
O4    5    0.694258    0.504862    0.625659    11.00000    0.01828    0.01342 =
         0.02278    0.00362    0.00573    0.00080
AFIX   3
H26   2    0.688198    0.476253    0.665722    11.00000   -1.50000
AFIX   0
O5    5    0.646458    0.057155    0.622260    11.00000    0.01262    0.01705 =
         0.02274    0.00753    0.00321    0.00223
AFIX   3
H40   2    0.578267    0.038325    0.631530    11.00000   -1.50000
AFIX   0
O6    5    0.688112    0.238493    0.408449    11.00000    0.01113    0.01604 =
         0.01795    0.00407    0.00265    0.00636
O7    5    0.904524    0.332314    0.414346    11.00000    0.01656    0.01122 =
         0.02102    0.00369    0.00634   -0.00160
AFIX   3
H45   2    0.953524    0.354414    0.380636    11.00000   -1.50000
AFIX   0
O8    5    0.886329    0.172962    0.431105    11.00000    0.01651    0.00950 =
         0.01851   -0.00016    0.00110    0.00543
AFIX   3
H44   2    0.883230    0.125002    0.399356    11.00000   -1.50000
AFIX   0
O9    5    0.739628   -0.084375    0.627514    11.00000    0.02095    0.01317 =
         0.01833    0.00329    0.00089    0.00411
O10   5    0.487439    0.326489    0.499105    11.00000    0.01600    0.01583 =
         0.03043    0.00413    0.00851    0.00510
AFIX   3
H51   2    0.440739    0.342306    0.531345    11.00000   -1.50000
H52   2    0.475389    0.268296    0.503656    11.00000   -1.50000
AFIX   0
O11   5    0.927735    0.414002    0.603114    11.00000    0.01443    0.01424 =
         0.01711    0.00290    0.00462    0.00251
AFIX   3
H53   2    0.918175    0.462782    0.630174    11.00000   -1.50000
AFIX   0
O12   5    0.847725    0.854999    0.492983    11.00000    0.03121    0.02510 =
         0.02658    0.00821    0.00856    0.01545
AFIX   3
H37   2    0.821583    0.875419    0.540816    11.00000   -1.50000
H49   2    0.838804    0.879889    0.455473    11.00000   -1.50000
AFIX   0
O13   5    0.826414    0.532197    0.436390    11.00000    0.01137    0.01726 =
         0.02062    0.00540    0.00552    0.00486
AFIX   3
H47   2    0.892324    0.530197    0.410740    11.00000   -1.50000
AFIX   0
O14   5    0.602172    0.484238    0.415335    11.00000    0.01067    0.02143 =
         0.02706    0.01063    0.00311    0.00226
AFIX   3
H30   2    0.521462    0.484648    0.398175    11.00000   -1.50000
AFIX   0
O15   5    0.701512    0.647176    0.395587    11.00000    0.01788    0.01603 =
         0.02098    0.00528    0.00439    0.00559
O16   5    0.971126    0.265623    0.612307    11.00000    0.01815    0.01298 =
         0.02237    0.00464    0.00842    0.00586
AFIX   3
H50   2    0.957278    0.216733    0.627299    11.00000   -1.50000
AFIX   0
O17   5    0.928299    0.588942    0.681774    11.00000    0.01717    0.01604 =
         0.02065    0.00265    0.00323    0.00397
O18   5    0.472465    0.134089    0.503603    11.00000    0.01350    0.01970 =
         0.01669    0.00613    0.00142    0.00152
AFIX   3
H17   2    0.415654    0.116529    0.457063    11.00000   -1.50000
H32   2    0.551071    0.892141    0.464812    11.00000   -1.50000
AFIX   0
O19   5    0.830307   -0.029331    0.349572    11.00000    0.01612    0.02201 =
         0.02023    0.00088    0.00196    0.00291
O20   5    0.634641   -0.005809    0.403887    11.00000    0.02100    0.01372 =
         0.01717    0.00020    0.00626   -0.00265
C1    1    0.653764    0.653782    0.794725    11.00000    0.02287    0.02046 =
         0.02452    0.00404    0.00884    0.00324
AFIX  43
H4    2    0.574136    0.649958    0.758882    11.00000   -1.20000
AFIX   0
C2    1    0.880100    0.640833    0.816538    11.00000    0.02454    0.01051 =
         0.02104    0.00481    0.00474   -0.00169
C3    1    0.641782    0.181653    0.260116    11.00000    0.02147    0.01669 =
         0.02123    0.00813    0.00272    0.00310
C4    1    0.659527    0.287879    0.670230    11.00000    0.01328    0.01762 =
         0.02049    0.00446    0.00737    0.00193
AFIX  23
H1    2    0.611359    0.224289    0.672908    11.00000   -1.20000
H2    2    0.595827    0.326665    0.658148    11.00000   -1.20000
AFIX   0
C5    1    0.751611    0.331083    0.753091    11.00000    0.01899    0.01431 =
         0.01919    0.00449    0.00402    0.00399
C6    1    0.982076    0.382773    0.813885    11.00000    0.02188    0.01697 =
         0.01877    0.00504    0.00380    0.00157
AFIX  43
H22   2    1.071045    0.393713    0.808096    11.00000   -1.20000
AFIX   0
C7    1    0.884179    0.350008    0.742503    11.00000    0.01588    0.01113 =
         0.02052    0.00291    0.00221    0.00357
C8    1    0.763850    0.635437    0.760215    11.00000    0.02342    0.01126 =
         0.01904    0.00451    0.00352    0.00286
C9    1    0.716018    0.348201    0.833153    11.00000    0.02830    0.02832 =
         0.02593    0.00264    0.01329    0.00400
AFIX  43
H28   2    0.627232    0.336666    0.839387    11.00000   -1.20000
AFIX   0
C10   1    0.984474    0.609757    0.770930    11.00000    0.02072    0.01423 =
         0.02358    0.00429   -0.00237    0.00269
AFIX  23
H3    2    1.064352    0.660121    0.781817    11.00000   -1.20000
H5    2    1.006848    0.553529    0.789807    11.00000   -1.20000
AFIX   0
C11   1    0.815866    0.382696    0.902923    11.00000    0.04387    0.03764 =
         0.01676    0.00298    0.01347    0.00455
AFIX  43
H41   2    0.793889    0.394916    0.956748    11.00000   -1.20000
AFIX   0
C12   1    0.948181    0.399383    0.894033    11.00000    0.03794    0.02851 =
         0.02118    0.00389   -0.00088    0.00150
AFIX  43
H36   2    1.014331    0.421716    0.941757    11.00000   -1.20000
AFIX   0
C13   1    0.779259    0.195553    0.281657    11.00000    0.01864    0.00816 =
         0.02070    0.00595    0.00591    0.00196
C14   1    0.890670    0.667054    0.903649    11.00000    0.03558    0.02627 =
         0.02118    0.00490   -0.00236    0.00084
AFIX  43
H18   2    0.970574    0.672477    0.939774    11.00000   -1.20000
AFIX   0
C15   1    0.780673    0.685000    0.935959    11.00000    0.04927    0.03011 =
         0.01765    0.00134    0.01044    0.00242
AFIX  43
H33   2    0.786105    0.702152    0.994377    11.00000   -1.20000
AFIX   0
C16   1    0.581420    0.210397    0.336192    11.00000    0.01138    0.02499 =
         0.02080    0.00723   -0.00141    0.00226
AFIX  23
H6    2    0.539513    0.263121    0.328071    11.00000   -1.20000
H48   2    0.514831    0.157385    0.344937    11.00000   -1.20000
AFIX   0
C19   1    0.806451   -0.056160    0.776183    11.00000    0.01132    0.02137 =
         0.01976    0.00575    0.00422    0.00379
C20   1    0.807002    0.034543    0.755939    11.00000    0.01016    0.01442 =
         0.02235    0.00315    0.00453    0.00513
C21   1    0.773151   -0.130809    0.697834    11.00000    0.01578    0.01930 =
         0.02806    0.00932    0.00181    0.00462
AFIX  23
H15   2    0.848619   -0.158890    0.690425    11.00000   -1.20000
H16   2    0.698698   -0.180913    0.701969    11.00000   -1.20000
AFIX   0
C22   1    0.632711   -0.081301    0.243517    11.00000    0.01549    0.01280 =
         0.02020    0.00508    0.00171    0.00278
C23   1    0.678449    0.604365    0.246459    11.00000    0.01013    0.02859 =
         0.02381    0.00945    0.00544    0.00189
C24   1    0.848735    0.167182    0.217945    11.00000    0.03026    0.01937 =
         0.02288    0.00559    0.01062    0.00930
AFIX  43
H8    2    0.940416    0.174814    0.230396    11.00000   -1.20000
AFIX   0
C25   1    0.688723    0.685462    0.317661    11.00000    0.01505    0.01930 =
         0.03081    0.01123    0.00509    0.00748
AFIX  23
H7    2    0.765623    0.735806    0.318287    11.00000   -1.20000
H12   2    0.609917    0.711482    0.310853    11.00000   -1.20000
AFIX   0
C26   1    0.491912   -0.141716    0.107939    11.00000    0.02494    0.03142 =
         0.02488    0.00241   -0.00512    0.00357
AFIX  43
H11   2    0.407688   -0.158513    0.074658    11.00000   -1.20000
AFIX   0
C27   1    0.741579   -0.092979    0.204964    11.00000    0.02130    0.01621 =
         0.02472    0.00385    0.00733    0.00839
C28   1    0.506309   -0.107431    0.192962    11.00000    0.01841    0.02830 =
         0.02474    0.00374    0.00496    0.00565
AFIX  43
H39   2    0.431953   -0.101452    0.217276    11.00000   -1.20000
AFIX   0
C29   1    0.727436   -0.127034    0.119096    11.00000    0.03149    0.02921 =
         0.02608    0.00501    0.01310    0.01196
AFIX  43
H38   2    0.801398   -0.133173    0.094397    11.00000   -1.20000
AFIX   0
C30   1    0.841020    0.112076    0.821508    11.00000    0.01829    0.02034 =
         0.02384    0.00084    0.00121    0.00264
AFIX  43
H43   2    0.845402    0.173227    0.809426    11.00000   -1.20000
AFIX   0
C31   1    0.781807    0.128004    0.136882    11.00000    0.05008    0.02597 =
         0.02029    0.00492    0.01413    0.01272
AFIX  43
H23   2    0.828943    0.109491    0.094961    11.00000   -1.20000
AFIX   0
C32   1    0.602483   -0.151769    0.070553    11.00000    0.04335    0.02956 =
         0.01561   -0.00191    0.00598    0.00923
AFIX  43
H29   2    0.591513   -0.175262    0.012658    11.00000   -1.20000
AFIX   0
C33   1    0.573608    0.142054    0.178744    11.00000    0.02572    0.02714 =
         0.02429    0.00573   -0.00541    0.00325
AFIX  43
H34   2    0.481787    0.133327    0.165972    11.00000   -1.20000
AFIX   0
C34   1    0.867794   -0.061302    0.268966    11.00000    0.01991    0.02685 =
         0.02802    0.00484    0.00812    0.00731
AFIX  23
H13   2    0.911717   -0.113767    0.273211    11.00000   -1.20000
H31   2    0.927847   -0.009746    0.252439    11.00000   -1.20000
AFIX   0
C35   1    0.695618    0.522075    0.278650    11.00000    0.01171    0.01703 =
         0.02382    0.00473    0.00304    0.00185
C36   1    0.695429    0.441358    0.220156    11.00000    0.01994    0.02492 =
         0.02615    0.00276    0.00476    0.00220
AFIX  43
H9    2    0.707604    0.385814    0.239448    11.00000   -1.20000
AFIX   0
C37   1    0.662727    0.677634    0.882076    11.00000    0.04027    0.02326 =
         0.03053    0.00080    0.01979    0.00357
AFIX  43
H42   2    0.588643    0.688743    0.904480    11.00000   -1.20000
AFIX   0
C38   1    0.834798   -0.069895    0.859595    11.00000    0.02879    0.02591 =
         0.02560    0.01307    0.00537    0.01010
AFIX  43
H14   2    0.833886   -0.130641    0.871861    11.00000   -1.20000
AFIX   0
C39   1    0.677239    0.443332    0.133544    11.00000    0.02553    0.04100 =
         0.02568   -0.00553    0.00810   -0.00102
AFIX  43
H19   2    0.678840    0.389462    0.095310    11.00000   -1.20000
AFIX   0
C40   1    0.864395    0.008322    0.924075    11.00000    0.03760    0.04270 =
         0.01725    0.00848    0.00171    0.01140
AFIX  43
H27   2    0.881593    0.000216    0.980468    11.00000   -1.20000
AFIX   0
C41   1    0.658451    0.606484    0.160352    11.00000    0.01916    0.04392 =
         0.03174    0.01820    0.00305    0.00500
AFIX  43
H20   2    0.646301    0.661808    0.140627    11.00000   -1.20000
AFIX   0
C42   1    0.868614    0.099037    0.905156    11.00000    0.03291    0.03100 =
         0.02062   -0.00345    0.00291    0.00858
AFIX  43
H35   2    0.890121    0.151466    0.948944    11.00000   -1.20000
AFIX   0
C43   1    0.656739    0.524801    0.103609    11.00000    0.02473    0.05451 =
         0.01783    0.00773    0.00464    0.00032
AFIX  43
H24   2    0.641780    0.524849    0.045354    11.00000   -1.20000
AFIX   0
C44   1    0.645521    0.115784    0.116893    11.00000    0.05582    0.02620 =
         0.01509    0.00021   -0.00252    0.00394
AFIX  43
H10   2    0.601945    0.089808    0.061668    11.00000   -1.20000
AFIX   0
B1    3    0.763078    0.022837    0.654652    11.00000    0.01393    0.00993 =
         0.02221    0.00334    0.00631    0.00221
B2    3    0.822649    0.235621    0.380213    11.00000    0.01254    0.01223 =
         0.02218    0.00452    0.00585    0.00184
B3    3    0.890324    0.330602    0.643788    11.00000    0.01181    0.01410 =
         0.01943    0.00482    0.00240    0.00057
B4    3    0.786443    0.599600    0.665878    11.00000    0.01247    0.01320 =
         0.02104    0.00436    0.00439    0.00098
B5    3    0.688946   -0.036084    0.339168    11.00000    0.01982    0.00984 =
         0.02024    0.00502    0.00393    0.00127
B6    3    0.705131    0.541829    0.379153    11.00000    0.01373    0.01280 =
         0.02693    0.00415    0.00339    0.00557

HKLF 4

REM  MAP_07 in P-1               New: P-1
REM R1 =  0.0513 for    7134 Fo > 4sig(Fo)  and  0.0699 for all    8984 data
REM    640 parameters refined using      0 restraints

END

WGHT      0.0291      5.2099

REM Highest difference peak  0.648,  deepest hole -0.378,  1-sigma level  0.080
Q1    1   0.6856  0.1177  0.4463  11.00000  0.05    0.65
Q2    1   0.8920  0.6949  0.4325  11.00000  0.05    0.58
Q3    1   0.8181 -0.0134  0.4978  11.00000  0.05    0.55
Q4    1   0.7050  0.3838  0.4336  11.00000  0.05    0.52
Q5    1   0.7426  0.4129  0.5637  11.00000  0.05    0.51
Q6    1   0.8388  0.2574  0.5024  11.00000  0.05    0.49
Q7    1   0.9319  0.7184  0.5580  11.00000  0.05    0.46
Q8    1   0.7258  0.1400  0.5756  11.00000  0.05    0.45
Q9    1   0.6298  0.6773  0.5020  11.00000  0.05    0.44
Q10   1   0.8014  0.0339  0.7047  11.00000  0.05    0.42
Q11   1   0.6439 -0.0580  0.2935  11.00000  0.05    0.42
Q12   1   0.8406  0.5579  0.5013  11.00000  0.05    0.41
Q13   1   0.7331  0.2160  0.4974  11.00000  0.05    0.41
Q14   1   0.7451  0.4873  0.4956  11.00000  0.05    0.40
Q15   1   0.6874  0.5213  0.3273  11.00000  0.05    0.40
Q16   1   0.7964  0.0240  0.3882  11.00000  0.05    0.38
Q17   1   0.7049  0.2555  0.4845  11.00000  0.05    0.36
Q18   1   0.7405 -0.1049  0.5675  11.00000  0.05    0.36
Q19   1   0.9564  0.3638  0.5914  11.00000  0.05    0.35
Q20   1   0.7452  0.3595  0.6048  11.00000  0.05    0.34
;
_shelx_res_checksum   84891

_shelx_hkl_file
;
   0   0  -3 12445.9 106.029   3
   0   0   3 12114.9 101.452   6
   0   0   3 12863.2 105.532   1
   0   0   3 12534.1 106.488   3
   0   0  -3 11981.3 104.019   1
   0   0  -3 12376.3 93.0034   4
   0   0   3 11983.2 91.7854   4
   0   0  -4 3861.38 68.2174   3
   0   0  -4 3893.04 61.0973   4
   0   0   4 3852.13 66.8605   6
   0   0   4 3711.90 60.0673   4
   0   0   4 3918.95 68.1413   1
   0   0  -4 3718.47 67.5868   1
   0   0   4 3983.11 70.8250   3
   0   0  -5 386.879 25.2328   4
   0   0   5 339.369 24.1854   4
   0   0   5 384.658 30.4328   1
   0   0   5 370.050 27.0406   6
   0   0   5 392.363 28.6685   3
   0   0  -5 381.125 28.6755   3
   0   0  -5 365.428 27.6310   1
   0   0  -6 233.977 25.3451   3
   0   0  -6 229.816 22.7913   4
   0   0   6 227.576 27.2642   3
   0   0   6 206.930 21.4199   4
   0   0   6 216.111 25.3858   1
   0   0   6 221.256 25.3315   6
   0   0  -6 208.993 23.6004   1
   0   0  -7 16999.2 167.057   4
   0   0   7 16610.1 183.206   6
   0   0  -7 16249.2 179.738   1
   0   0   7 16424.9 162.667   4
   0   0   7 16520.5 184.774   3
   0   0   8 19292.1 188.887   4
   0   0  -8 19330.2 210.073   1
   0   0   8 19581.2 213.978   6
   0   0  -8 19719.4 191.460   4
   0   0   8 19701.7 219.940   3
   0   0   9 8664.85 152.136   6
   0   0   9 8259.12 151.592   3
   0   0  -9 8570.46 150.372   1
   0   0  -9 8461.68 134.442   4
   0   0 -10 14440.3 206.095   1
   0   0  10 15019.8 211.139   6
   0   0 -10 14891.2 188.013   4
   0   0  10 14972.7 214.743   3
   0   0  11 7644.71 160.428   6
   0   0 -11 7356.94 154.030   1
   0   0  11 7498.16 161.197   3
   0   0  12 7098.33 163.359   6
   0   0 -12 6845.69 157.046   1
   0   0  12 7127.46 163.642   3
   0   0  13 2774.43 108.708   6
   0   0 -13 2838.96 108.906   1
   0   0  13 2748.84 110.832   3
   0   0 -14 210.322 42.0082   1
   0   0  14 184.547 30.3166   2
   0   0 -14 145.844 34.4341   5
   0   0  14 149.890 37.0350   3
   0   0  14 87.7334 28.4709   6
   0   0  15 781.612 55.3836   2
   0   0  15 774.083 67.0470   3
   0   0 -15 814.736 68.4963   5
   0   0  15 749.291 63.0317   6
   0   0 -16 1607.24 94.6196   1
   0   0  16 1720.87 100.710   3
   0   0  16 1653.69 94.2803   6
   0   0 -16 1698.49 99.2612   5
   0   0 -17 1063.09 83.0452   5
   0   0  17 1097.27 82.0843   6
   0   0 -17 1100.31 85.2906   1
   0   0 -18 2388.45 121.021   1
   0   0  18 2264.93 118.548   6
   0   0 -18 2233.68 121.787   5
   0   0  19 1590.68 104.092   6
   0   0 -19 1667.41 113.493   1
   0   0 -19 1563.04 108.070   5
   0   0  20 671.946 74.8639   6
   0   0 -20 745.751 81.6563   5
   0   1 -20 73.5485 42.8242   5
   0   1 -19 32.1150 34.2364   5
   0  -1  19 153.203 41.6333   6
   0  -1  18-28.7235 40.4850   3
   0   1 -18-122.990 49.7434   1
   0  -1  18-22.9757 33.5108   6
   0   1 -18 29.4357 37.7671   5
   0  -1  17 54.2543 36.3581   3
   0   1 -17 92.7301 42.4224   1
   0   1 -17 40.2992 31.9829   5
   0  -1  17-7.65941 30.1592   6
   0  -1  16-38.6225 31.1172   3
   0   1 -16-31.3222 29.7027   5
   0  -1  16 1.58197 26.1697   2
   0  -1  16-35.8587 32.1874   6
   0   1 -16 12.1671 35.5778   1
   0  -1  15 460.002 52.8786   3
   0   1 -15 484.735 55.2384   5
   0  -1  15 504.078 48.9184   2
   0   1 -15 583.209 59.8584   1
   0  -1  15 484.071 51.2467   6
   0   1 -14 216.674 42.1207   1
   0  -1  14 142.764 32.4138   6
   0  -1  14 132.785 34.2254   3
   0   1 -14 185.602 36.7989   5
   0  -1  13 1216.43 72.6338   6
   0  -1  13 1187.19 73.3767   3
   0   1 -13 1206.18 72.5604   5
   0   1 -13 1348.77 73.9850   1
   0  -1  12 0.42630 22.1249   3
   0   1 -12 56.0225 25.5592   1
   0   1 -12 21.1362 20.8766   5
   0  -1  12 13.2888 20.5891   6
   0  -1  11 16.2634 20.4955   6
   0   1 -11 8.63854 21.2793   5
   0  -1  11-30.4853 21.8939   3
   0   1 -11 8.30084 18.9646   4
   0   1 -11-7.96154 20.8774   1
   0   1 -10 939.165 54.1579   4
   0   1 -10 833.057 53.7184   5
   0   1 -10 911.329 53.7695   1
   0  -1  10 890.497 52.9188   6
   0  -1  10 865.907 53.8514   3
   0  -1   9 584.781 43.3756   3
   0   1  -9 651.889 45.0217   5
   0   1  -9 788.278 51.6030   1
   0  -1   9 738.453 47.2866   6
   0   1  -9 605.264 42.4975   4
   0   1  -8 755.582 43.7462   4
   0  -1   8 977.372 52.1997   6
   0  -1   8 699.303 43.8857   3
   0  -1   7 817.513 42.8225   4
   0  -1   7 815.277 44.8839   3
   0   1  -7 719.189 40.3447   1
   0   1  -7 882.952 43.8686   4
   0  -1   7 857.089 43.9252   1
   0  -1   6 72.8159 20.1149   3
   0  -1   6 92.0198 20.3912   4
   0  -1   6 75.5831 17.9651   1
   0   1  -6 95.8862 20.2184   4
   0   1  -6 68.6028 18.6746   3
   0   1  -6 40.6316 15.3903   1
   0   1  -5-9.51916 15.7311   3
   0  -1   5 1.12512 16.3645   4
   0  -1   5 7.01167 16.1619   3
   0   1  -5 7.70693 14.2017   5
   0   1  -5-2.20824 14.1818   4
   0  -1   5 3.64479 14.4190   1
   0   1  -5 8.47849 13.6815   1
   0   1  -4 66.6397 17.3211   1
   0  -1   4 68.1635 16.1300   3
   0  -1   4 123.645 18.2090   1
   0   1  -4 83.1697 16.0767   3
   0   1  -4 87.4399 18.3390   4
   0   1  -4 94.6872 17.4374   5
   0  -1   4 78.0821 18.1060   4
   0   1  -3 58.1587 12.4474   1
   0  -1   3 83.9964 15.7356   4
   0  -1   3 178.404 16.9853   1
   0  -1   3 86.1014 13.2701   3
   0   1  -3 70.9500 12.6226   5
   0   1  -3 79.8962 15.0821   4
   0   1  -3 93.0328 14.0223   3
   0  -1  -2 377.534 21.0314   3
   0   1   2 413.642 21.4302   1
   0  -1  -2 375.221 20.4363   1
   0   1   2 393.818 20.3693   6
   0  -1  -2 417.238 20.8583   6
   0  -1  -3 1028.65 36.4874   3
   0  -1  -3 928.648 34.8283   6
   0   1   3 969.559 35.0115   3
   0  -1  -3 1019.20 35.3003   1
   0  -1  -3 915.958 22.0501   4
   0   1   3 919.914 21.6436   4
   0   1   3 1042.35 36.1509   1
   0   1   3 908.853 35.8840   6
   0   1   4 70.9875 17.2048   6
   0  -1  -4 62.1159 17.7467   6
   0   1   4 66.2490 17.7487   3
   0  -1  -4 65.9661 12.1691   4
   0   1   4 61.2940 11.1114   4
   0  -1  -4 29.8902 16.9163   1
   0  -1  -4 70.6348 19.0638   3
   0   1   4 58.1688 18.7816   1
   0  -1  -5 870.387 30.6907   4
   0   1   5 865.393 41.5987   3
   0   1   5 924.158 41.1249   1
   0   1   5 820.170 29.4077   4
   0  -1  -5 876.557 41.3465   3
   0  -1  -5 821.464 42.4250   1
   0   1   5 828.855 40.6123   6
   0   1   6 781.867 41.1685   1
   0   1   6 738.924 42.9272   6
   0  -1  -6 740.774 44.9959   1
   0  -1  -6 795.385 32.3468   4
   0   1   6 754.433 31.1060   4
   0   1   6 834.924 42.7702   3
   0  -1  -6 747.545 42.2246   3
   0   1   7 428.670 35.2605   3
   0  -1  -7 364.480 35.9708   1
   0  -1  -7 452.786 28.2326   4
   0   1   7 441.866 26.5141   4
   0   1   7 454.983 35.7601   6
   0   1   8 40.1845 14.6693   4
   0  -1  -8 31.7616 15.9789   4
   0  -1  -8 20.7834 23.9204   1
   0   1   8 19.1195 19.3991   3
   0   1   8 19.4672 20.6476   6
   0  -1  -9 1006.80 45.7505   4
   0   1   9 917.429 43.0154   4
   0  -1  -9 998.814 60.3316   1
   0   1   9 902.322 56.5461   6
   0   1   9 1011.96 56.8419   3
   0  -1 -10 4848.20 124.585   1
   0   1  10 4831.39 126.946   6
   0   1  10 4703.13 123.876   3
   0   1  11 1601.96 78.5493   3
   0   1  11 1623.33 78.6873   6
   0  -1 -11 1697.83 79.4140   1
   0   1  12 592.040 40.9815   2
   0  -1 -12 736.653 63.3496   1
   0   1  12 544.291 49.4794   6
   0   1  12 525.919 50.2144   3
   0   1  13 1307.48 78.0686   6
   0   1  13 1339.37 78.6426   3
   0  -1 -13 1381.80 80.4349   1
   0   1  13 1261.58 60.5414   2
   0   1  14 46.8780 20.1907   2
   0   1  14 45.7984 25.8553   6
   0  -1 -14 43.9045 32.6055   1
   0  -1 -15 16.5433 39.5938   1
   0   1  15 40.3122 29.2069   6
   0  -1 -16 156.117 46.3853   1
   0   1  16 41.1741 27.7892   6
   0  -1 -17 429.933 63.1365   1
   0   1  17 380.103 54.0131   6
   0  -1 -17 352.395 54.0683   5
   0  -1 -18 688.214 74.2091   5
   0  -1 -18 879.189 86.2442   1
   0   1  18 726.867 74.9918   6
   0  -1 -19-19.4802 32.0517   5
   0   1  19 31.6349 35.5099   6
   0   1  20 419.666 63.9617   6
   0   2 -20-21.4488 42.2590   5
   0  -2  20 22.1497 35.8930   3
   0  -2  19-8.11158 33.4713   6
   0  -2  19 93.6808 41.5222   3
   0   2 -19 49.7548 35.1204   5
   0   2 -18 103.277 36.9135   5
   0  -2  18 56.3554 33.1278   3
   0  -2  18 180.265 40.7047   6
   0  -2  17-8.28310 26.6422   6
   0  -2  17 72.0097 34.8514   2
   0   2 -17 46.7886 37.7529   1
   0  -2  17 35.6868 31.2490   3
   0   2 -17 8.29986 28.3748   5
   0   2 -16 29.4544 27.2036   5
   0  -2  16 22.5160 29.2462   2
   0  -2  16 6.56603 26.9419   6
   0  -2  16-32.7744 31.6075   3
   0   2 -15 382.194 48.4527   5
   0  -2  15 365.233 44.7903   6
   0  -2  15 403.912 47.7569   3
   0   2 -14 909.040 60.7423   1
   0  -2  14 941.687 67.8989   3
   0  -2  14 935.463 64.2195   6
   0   2 -14 981.777 69.1162   5
   0   2 -13 34.5486 24.3372   1
   0   2 -13 70.6242 29.7455   5
   0  -2  13 36.8124 24.5628   6
   0  -2  13 50.0954 27.3648   3
   0   2 -12 32.6954 23.5198   5
   0   2 -12 58.5521 25.6461   1
   0  -2  12 56.3144 27.7142   3
   0  -2  12 57.0667 26.4668   6
   0   2 -11 35.3919 21.9114   4
   0  -2  11 58.6122 23.9964   6
   0  -2  11 48.7376 24.7531   3
   0   2 -11 38.7486 20.0160   5
   0   2 -11 68.8409 25.0420   1
   0  -2  10 1047.29 59.2338   3
   0  -2  10 1078.24 55.5156   6
   0   2 -10 1106.70 59.1820   5
   0   2 -10 1117.89 60.9160   4
   0   2 -10 1104.43 54.8938   1
   0   2  -9 2008.31 69.5633   1
   0   2  -9 2134.72 77.7233   4
   0   2  -9 2108.17 76.4912   5
   0  -2   9 2060.02 75.4436   3
   0   2  -8 4266.08 103.569   4
   0   2  -8 4359.26 99.9927   5
   0  -2   8 4371.09 99.9510   3
   0   2  -8 3933.58 85.4722   1
   0  -2   7 98.7923 23.0304   3
   0   2  -7 98.1563 20.2145   1
   0  -2   7 91.9283 19.6091   1
   0   2  -7 58.7503 19.0898   4
   0   2  -7 79.1916 20.4470   5
   0   2  -6 4501.88 88.5523   5
   0   2  -6 4310.16 94.2266   4
   0  -2   6 4530.88 87.7127   3
   0  -2   6 4363.28 79.0749   1
   0  -2   6 4437.76 92.0740   4
   0   2  -6 4364.38 79.3566   1
   0   2  -6 4442.00 88.5090   3
   0  -2   5 46.2297 20.6316   4
   0   2  -5 21.8681 15.6905   1
   0   2  -5 19.3293 20.7182   4
   0   2  -5 4.58250 17.6184   5
   0   2  -5 26.8115 15.6084   3
   0  -2   5 19.2926 15.1070   3
   0  -2   4 2967.80 59.3744   3
   0   2  -4 2709.35 56.3415   5
   0   2  -4 2842.93 58.1523   3
   0   2  -4 2818.82 65.4185   4
   0  -2   4 2885.05 50.7029   1
   0  -2   4 2905.50 59.5536   5
   0  -2   4 2816.64 64.2581   4
   0   2  -3 511.723 24.6055   5
   0  -2   3 490.687 23.7034   3
   0   2  -3 529.222 24.8982   3
   0  -2   3 494.287 27.2814   4
   0   2  -3 538.475 29.4869   4
   0  -2   3 455.389 22.1307   5
   0  -2   2 7092.40 72.6390   3
   0  -2   2 7103.15 64.1982   6
   0  -2   2 6896.90 72.2992   5
   0   2  -2 6879.18 72.6449   3
   0  -2   2 6576.98 80.0134   4
   0   2  -2 6767.85 79.8586   4
   0   2  -2 6735.48 71.4513   5
   0   2  -1 1303.24 31.8181   4
   0  -2   1 1019.92 27.7093   4
   0   2  -1 1266.64 31.0237   5
   0   2   0 977.015 26.2415   1
   0   2   1 430.178 23.1266   6
   0  -2  -1 433.501 22.3784   1
   0  -2  -1 412.159 21.6301   6
   0   2   1 414.029 24.1678   1
   0  -2  -2 240.263 21.0398   1
   0   2   2 226.017 21.5609   6
   0  -2  -2 234.832 20.9252   6
   0   2   2 234.755 21.1574   1
   0   2   3 1324.66 46.4645   6
   0  -2  -3 1343.45 45.3469   3
   0   2   3 1367.31 46.0478   1
   0  -2  -3 1361.90 46.2339   1
   0  -2  -3 1389.91 45.1636   6
   0   2   4 1910.34 28.9489   2
   0  -2  -4 1903.38 30.0388   4
   0  -2  -4 1994.82 59.5458   1
   0   2   4 2096.20 60.4544   1
   0   2   4 2088.07 60.3180   6
   0  -2  -4 2084.05 58.9414   6
   0   2   4 1865.62 28.8874   4
   0  -2  -4 2107.15 62.1978   3
   0  -2  -5 5533.15 102.860   6
   0  -2  -5 5914.08 107.011   3
   0   2   5 5577.83 60.7110   4
   0   2   5 5823.02 107.665   6
   0   2   5 5824.50 106.252   1
   0  -2  -5 5596.63 104.694   1
   0  -2  -5 5569.14 62.7427   4
   0  -2  -6 69.0138 21.9211   1
   0  -2  -6 78.4727 12.5970   4
   0   2   6 55.2606 19.5273   6
   0   2   6 98.5281 13.2123   4
   0   2   7 240.595 21.3856   4
   0   2   7 245.759 34.3298   6
   0  -2  -7 53.7056 28.4011   1
   0   2   8 2410.50 57.0899   4
   0  -2  -8 2441.14 85.4553   1
   0   2   8 2500.19 85.9319   6
   0   2   9 269.310 35.7065   6
   0   2   9 272.018 23.2783   2
   0  -2  -9 290.998 37.6200   1
   0   2   9 252.335 23.2985   4
   0   2  10 846.855 41.0070   4
   0  -2 -10 931.425 62.1206   1
   0   2  10 972.109 61.2491   6
   0   2  10 920.949 41.5156   2
   0   2  11 1957.72 89.2209   6
   0  -2 -11 1747.16 86.4593   1
   0   2  11 1824.08 60.6310   2
   0   2  12 1438.71 79.8940   6
   0   2  12 1328.17 55.8253   2
   0   2  13 629.949 42.3299   2
   0  -2 -13 748.174 65.9758   1
   0   2  13 621.666 60.2252   6
   0   2  14 513.345 55.4587   6
   0  -2 -14 1005.03 86.3805   1
   0  -2 -15 220.390 48.8616   1
   0   2  15 258.067 43.5663   6
   0  -2 -16 479.697 62.3549   1
   0   2  16 351.639 53.4844   6
   0  -2 -17 329.427 65.9276   1
   0   2  17 419.919 58.8946   6
   0   2  18 83.7209 38.7883   6
   0  -2 -18 240.865 65.2579   1
   0   2  19 207.148 50.8634   6
   0  -2 -19 121.000 44.5088   5
   0   3 -20 1042.74 91.8686   5
   0  -3  20 1114.93 94.8145   3
   0  -3  19 210.849 49.6789   3
   0   3 -19 196.704 47.1269   5
   0  -3  18 15.7097 34.0281   3
   0  -3  18 0.43301 27.9066   6
   0  -3  18-3.67531 36.8967   2
   0   3 -18 56.2676 35.9775   5
   0  -3  17 77.8675 32.6708   6
   0  -3  17 106.199 40.8111   2
   0  -3  17 55.1949 33.8018   3
   0   3 -17 5.61143 40.7144   1
   0   3 -17 62.2115 31.4307   5
   0  -3  16-1.77501 29.1888   3
   0   3 -16 21.1158 29.3941   5
   0  -3  16-7.18058 23.9477   6
   0  -3  15 110.892 30.8346   6
   0  -3  15 116.624 35.8427   3
   0   3 -15 134.320 34.4857   5
   0  -3  14 76.8411 31.3052   3
   0  -3  14 78.0895 31.2096   6
   0   3 -14-9.75527 31.5023   1
   0   3 -14 101.952 32.4063   5
   0   3 -13 365.819 41.1560   1
   0  -3  13 427.815 47.0055   6
   0  -3  13 399.050 49.8901   3
   0   3 -13 397.836 46.6654   5
   0   3 -12 163.527 32.2171   4
   0   3 -12 163.291 30.8241   5
   0  -3  12 166.195 29.7995   6
   0   3 -12 124.448 27.0865   1
   0  -3  12 117.779 28.6120   3
   0   3 -11 596.996 48.2745   5
   0   3 -11 651.710 53.2455   4
   0  -3  11 617.956 50.4680   3
   0   3 -11 627.643 44.4654   1
   0   3 -10 2075.59 79.3396   5
   0   3 -10 2086.76 84.6777   4
   0   3 -10 2066.57 71.6791   1
   0  -3  10 2089.41 78.9110   3
   0   3  -9 151.191 26.1077   5
   0   3  -9 105.553 19.4853   1
   0   3  -9 157.751 29.8607   4
   0  -3   9 186.014 29.0311   3
   0   3  -8 516.047 42.8233   5
   0  -3   8 500.329 42.0381   3
   0  -3   8 583.757 42.6886   1
   0   3  -8 571.115 47.0243   4
   0   3  -7 178.933 28.3751   4
   0   3  -7 174.004 23.4622   5
   0  -3   7 160.627 24.2492   3
   0  -3   7 296.095 29.2743   1
   0   3  -6 564.437 37.8830   3
   0  -3   6 549.604 31.7986   1
   0  -3   6 571.688 36.4897   3
   0   3  -6 538.076 38.2208   5
   0   3  -6 656.470 45.1080   4
   0  -3   6 585.010 37.6785   5
   0  -3   5 20.5760 16.3412   3
   0  -3   5 58.0542 22.3859   4
   0   3  -5 24.8756 20.3629   3
   0   3  -5 10.4085 14.9458   5
   0  -3   5 19.4323 10.9704   1
   0  -3   5 24.0383 12.8957   5
   0   3  -5 96.7877 26.1278   4
   0  -3   4 161.956 29.9290   4
   0   3  -4 73.6233 22.5405   3
   0  -3   4 8.10040 12.4313   3
   0  -3   4 5.06455 11.6827   5
   0   3  -4 101.490 22.4483   5
   0   3  -4 215.991 31.2295   4
   0   3  -3 72.6087 15.1332   5
   0  -3   3 83.0140 13.3512   6
   0  -3   3 76.8194 14.4532   3
   0  -3   3 106.829 19.1957   4
   0   3  -3 69.5823 16.0674   3
   0  -3   3 69.1231 13.5058   5
   0   3  -3 120.136 22.3541   4
   0  -3   2 958.401 33.3452   5
   0  -3   2 1071.83 31.9179   6
   0  -3   2 1004.80 33.8190   3
   0   3  -2 1015.37 35.0745   5
   0   3  -2 1080.62 38.6092   4
   0  -3   2 1136.79 38.2545   4
   0   3  -2 986.503 30.7088   6
   0  -3   1 6477.22 74.5737   6
   0   3  -1 6094.22 81.1779   5
   0   3  -1 6574.81 79.5207   4
   0  -3   1 6078.00 79.8866   5
   0  -3   1 6752.25 78.9514   4
   0   3  -1 6125.90 74.2282   6
   0  -3   0 5258.24 71.8964   6
   0  -3   0 5877.69 64.0968   4
   0   3   0 5149.05 72.7867   6
   0   3   0 5771.09 63.1087   4
   0   3   0 5153.71 75.6485   5
   0  -3   0 5229.43 72.8432   1
   0  -3   0 5175.37 76.2940   5
   0  -3  -1 1258.03 41.6979   5
   0   3   1 1371.77 43.4048   1
   0  -3  -1 1328.76 25.2043   4
   0  -3  -1 1317.31 42.1102   1
   0  -3  -1 1320.86 41.6708   6
   0   3   1 1311.78 42.0001   6
   0   3   2 832.026 37.4847   6
   0   3   2 854.028 38.0074   1
   0  -3  -2 839.185 36.9143   1
   0  -3  -2 880.266 38.2171   6
   0  -3  -3 6162.86 100.967   1
   0   3   3 6072.93 101.979   6
   0   3   3 6273.13 101.282   1
   0  -3  -3 6344.29 102.161   6
   0   3   4 1503.18 56.2843   6
   0   3   4 1655.06 57.7500   1
   0  -3  -4 1475.73 56.2799   6
   0  -3  -4 1559.17 56.4540   1
   0  -3  -5 5906.82 114.816   1
   0   3   5 6001.29 115.798   6
   0   3   6 4.75058 18.9834   6
   0   3   6 7.87527 6.93221   2
   0   3   6 3.97966 6.36381   4
   0  -3  -6 0.04043 19.2726   1
   0  -3  -7 5267.61 121.534   1
   0   3   7 4936.90 62.8779   4
   0   3   7 4822.44 62.5899   2
   0   3   7 5248.77 121.668   6
   0   3   8 792.158 29.5108   4
   0   3   8 896.776 56.5251   6
   0  -3  -8 741.600 49.7592   1
   0   3   8 806.594 29.5610   2
   0  -3  -9 701.656 55.5566   1
   0   3   9 615.594 29.6064   2
   0   3   9 668.941 52.8273   6
   0   3   9 584.154 28.4396   4
   0   3  10 1174.57 69.7128   6
   0   3  10 1122.98 41.3241   4
   0  -3 -10 1051.65 68.6828   1
   0   3  10 1052.58 40.1799   2
   0   3  11 349.074 25.9806   2
   0  -3 -11 283.118 43.6446   1
   0   3  11 365.920 45.0903   6
   0   3  12 3895.92 134.411   6
   0   3  12 3625.68 82.5223   2
   0  -3 -12 3836.63 138.238   1
   0   3  13 1161.78 78.3248   6
   0  -3 -13 1125.21 81.1254   1
   0   3  14 977.879 76.3843   6
   0  -3 -14 2002.75 111.052   1
   0  -3 -15 303.068 52.9068   1
   0   3  15 225.892 45.3858   6
   0   3  16 225.128 47.6558   6
   0  -3 -16 307.261 63.6433   1
   0  -3 -17 307.837 72.5144   1
   0   3  17-11.3307 32.1439   6
   0  -3 -18 208.819 72.3439   1
   0   3  18 47.0635 37.1823   6
   0  -4  20 55.8559 40.4185   3
   0   4 -20 34.0762 34.0086   5
   0  -4  19 50.9633 42.3208   2
   0   4 -19 46.0537 38.6029   5
   0  -4  19 43.9460 35.1100   3
   0  -4  18 24.6261 32.8960   3
   0   4 -18-15.8445 33.4730   5
   0  -4  17 42.2495 24.6137   6
   0   4 -17 35.4526 27.9281   5
   0  -4  17 0.82174 29.2976   3
   0  -4  16 1931.65 93.7959   6
   0  -4  16 2014.33 106.013   3
   0   4 -16 1975.13 102.391   5
   0   4 -15 912.192 67.6510   5
   0  -4  15 1036.26 73.4741   3
   0  -4  15 961.498 66.8678   6
   0  -4  14 92.8099 26.4889   6
   0  -4  14 101.124 32.4709   3
   0   4 -14 72.8142 25.8111   5
   0  -4  13 87.1390 28.7025   3
   0   4 -13 74.2392 23.8800   5
   0   4 -12 513.164 50.2678   4
   0  -4  12 525.427 48.5033   3
   0   4 -12 557.655 47.5505   5
   0   4 -11 1583.27 73.5652   5
   0  -4  11 1650.54 75.8755   3
   0   4 -11 1642.83 81.3299   4
   0   4 -10 3115.20 107.417   4
   0   4 -10 3235.61 99.4610   5
   0  -4  10 3382.84 100.378   3
   0   4  -9 32.7945 23.3210   4
   0   4  -9 31.2003 17.7786   5
   0  -4   9 33.0552 19.4843   3
   0  -4   8 805.033 46.0797   3
   0  -4   8 918.864 45.6072   1
   0   4  -8 827.916 46.9631   5
   0   4  -8 846.782 52.4578   4
   0  -4   7 1844.64 65.2033   3
   0   4  -7 1714.08 69.4429   4
   0  -4   7 1715.22 53.3641   1
   0   4  -7 1585.08 62.2700   5
   0  -4   6 5071.10 97.2468   5
   0   4  -6 5169.95 113.404   4
   0   4  -6 5236.81 98.6807   3
   0   4  -6 4992.90 96.9277   5
   0  -4   6 5202.02 97.8315   3
   0  -4   6 5226.22 84.8780   1
   0   4  -5 9069.92 122.875   5
   0  -4   5 9393.94 126.097   3
   0   4  -5 9115.76 142.612   4
   0  -4   5 9436.96 124.674   5
   0   4  -5 9485.46 124.279   3
   0   4  -4 8259.28 126.016   4
   0  -4   4 8603.62 99.6531   6
   0   4  -4 8553.62 113.626   3
   0  -4   4 8201.91 111.870   5
   0  -4   4 8656.32 114.574   3
   0   4  -4 8344.80 113.593   5
   0  -4   4 8739.06 127.397   4
   0  -4   3 69732.0 332.705   4
   0   4  -3 69450.9 276.934   6
   0  -4   3 70730.3 311.396   5
   0  -4   3 70463.4 277.220   6
   0   4  -3 68148.9 336.416   4
   0  -4   3 70087.5 312.595   3
   0   4  -3 68828.7 315.744   5
   0  -4   2 12849.3 119.982   6
   0  -4   2 12126.6 130.688   5
   0   4  -2 12589.8 134.457   4
   0  -4   2 12634.1 133.763   4
   0   4  -2 11824.4 129.800   5
   0   4  -2 12307.9 117.811   6
   0  -4   1 23973.3 166.138   4
   0   4  -1 24078.3 166.095   4
   0  -4   1 24203.0 168.697   6
   0   4  -1 22829.9 178.049   5
   0  -4   1 24405.3 186.664   5
   0   4   0 34834.2 228.372   5
   0  -4   0 37023.4 233.953   5
   0  -4   0 35571.6 215.814   6
   0  -4   0 35155.9 177.849   4
   0   4   0 34627.5 217.996   6
   0   4   0 35209.1 178.422   4
   0  -4   0 34520.5 214.140   1
   0  -4  -1 2923.32 46.4098   4
   0   4   1 3100.15 74.9743   6
   0  -4  -1 3349.01 77.9035   5
   0  -4  -1 2932.88 69.6487   1
   0   4   1 3132.12 73.6369   1
   0  -4  -1 2928.82 69.8829   6
   0  -4  -2 7498.71 55.5884   4
   0  -4  -2 8312.59 119.871   6
   0   4   2 7854.79 119.579   6
   0   4   2 8123.89 117.627   1
   0  -4  -2 8145.43 118.135   1
   0   4   3 10338.5 142.909   6
   0   4   3 10687.3 144.628   1
   0  -4  -3 10331.8 141.881   1
   0   4   4 4399.85 100.360   6
   0  -4  -4 4434.90 99.7874   1
   0  -4  -5 2941.09 86.2915   1
   0   4   5 2907.14 88.1281   6
   0   4   6 1518.43 67.9829   6
   0  -4  -6 1398.04 66.0128   1
   0   4   7 2261.42 31.7523   4
   0  -4  -7 3177.68 100.209   1
   0   4   7 3157.98 100.150   6
   0   4   8 1052.84 62.7566   6
   0   4   8 867.333 25.1598   2
   0   4   8 898.601 25.4160   4
   0  -4  -8 1030.38 64.0728   1
   0   4   9 974.299 30.2934   4
   0   4   9 960.186 29.8200   2
   0   4   9 1128.63 68.4900   6
   0  -4  -9 1159.23 69.8990   1
   0   4  10 1424.98 78.6899   6
   0  -4 -10 1317.05 79.2150   1
   0   4  10 1204.53 36.5007   2
   0  -4 -11 67.4658 34.5029   1
   0   4  11 57.3154 12.2669   2
   0   4  11 43.9194 29.3910   6
   0  -4 -12 848.151 68.8110   1
   0   4  12 928.312 70.4614   6
   0   4  13 1391.27 88.9458   6
   0  -4 -13 1384.85 91.3608   1
   0  -4 -14 147.324 52.8963   1
   0   4  14 47.8972 29.8904   6
   0  -4 -15 862.508 80.5126   1
   0   4  15 760.477 72.3023   6
   0   4  16 330.138 53.4711   6
   0  -4 -16 547.876 75.7342   1
   0   4  17-8.03510 34.5950   6
   0  -4 -17 158.533 61.9525   1
   0  -4 -18 12.7359 83.8601   1
   0   4  18 87.9484 40.2745   6
   0  -5  20 37.5336 39.6067   3
   0  -5  20-24.7782 60.5768   2
   0  -5  19-72.7411 58.9937   2
   0   5 -19 41.4528 36.0373   5
   0  -5  19-18.5819 38.1333   3
   0   5 -18 120.799 40.0079   5
   0  -5  18 90.4078 37.8656   3
   0  -5  17 695.830 61.6622   6
   0   5 -17 658.612 65.4098   5
   0  -5  17 722.525 69.9046   3
   0   5 -16 1560.44 92.4402   5
   0  -5  16 1490.30 92.6431   3
   0  -5  16 1528.78 84.0172   6
   0   5 -15 695.231 61.5678   5
   0  -5  15 542.337 58.5777   3
   0  -5  15 751.256 57.9298   6
   0   5 -14 284.850 41.6914   5
   0  -5  14 289.405 41.5748   3
   0  -5  13 375.170 46.3424   3
   0   5 -13 386.803 44.0096   5
   0   5 -12 31.0471 26.2691   4
   0  -5  12 37.4034 25.3868   3
   0   5 -12 29.4809 21.5846   5
   0   5 -11 215.601 31.0825   5
   0  -5  11 176.226 32.4428   3
   0   5 -11 146.096 32.1440   4
   0  -5  10 2099.41 82.0609   3
   0   5 -10 2200.03 91.7008   4
   0   5 -10 2166.18 84.0385   5
   0   5  -9 3164.37 104.937   4
   0  -5   9 2899.65 89.8039   3
   0   5  -9 2979.38 91.9453   5
   0  -5   8 3124.39 90.5586   3
   0   5  -8 2909.25 86.9311   5
   0   5  -8 3011.28 98.3091   4
   0  -5   8 2934.51 74.1472   1
   0   5  -7 2213.02 72.1043   5
   0  -5   7 2182.90 72.6012   3
   0  -5   7 2309.96 62.3504   1
   0   5  -7 2308.90 83.3800   4
   0  -5   6 1537.81 50.3850   6
   0  -5   6 1552.25 57.6871   3
   0   5  -6 1501.08 67.0532   4
   0   5  -6 1565.44 59.0287   5
   0  -5   5 225.009 22.7898   6
   0   5  -5 210.786 27.1413   5
   0   5  -5 233.186 31.8046   4
   0  -5   5 228.688 24.4331   5
   0   5  -5 203.519 26.3962   3
   0  -5   5 114.636 25.8610   3
   0  -5   4 1479.89 60.2355   3
   0  -5   4 1918.13 53.8756   6
   0   5  -4 1746.02 60.7313   5
   0   5  -4 1913.71 67.0577   4
   0  -5   4 1605.42 59.9786   5
   0  -5   3 1291.74 49.8308   3
   0  -5   3 1419.85 54.2001   4
   0   5  -3 1279.43 47.3315   6
   0   5  -3 1259.09 52.2428   5
   0  -5   3 1414.64 51.5433   5
   0  -5   3 1441.65 47.3727   6
   0   5  -3 1434.06 56.0980   4
   0   5  -2 449.975 33.5382   4
   0   5  -2 248.711 26.6481   6
   0  -5   2 399.702 27.0409   6
   0   5  -2 207.302 31.3843   5
   0  -5   2 438.372 31.1317   4
   0  -5   2 262.674 30.5830   5
   0  -5   1 710.901 35.1835   1
   0   5  -1 695.296 33.9889   4
   0  -5   1 656.640 37.7622   5
   0   5  -1 636.287 34.5458   6
   0  -5   1 692.361 33.6921   6
   0  -5   1 723.184 33.4933   4
   0   5  -1 632.884 36.3760   5
   0  -5   0 5894.44 105.645   5
   0  -5   0 5895.88 99.1232   1
   0  -5   0 5924.46 98.9025   6
   0  -5   0 5950.47 82.9180   4
   0   5   0 5688.36 103.197   5
   0   5   0 5599.02 98.8960   6
   0  -5  -1 8629.48 126.709   1
   0  -5  -1 8561.57 87.1620   4
   0   5   1 8497.66 124.040   1
   0  -5  -1 8742.92 131.850   5
   0   5   1 8256.99 125.560   6
   0  -5  -1 8618.32 125.765   6
   0  -5  -2 13495.2 165.775   1
   0   5   2 13396.6 168.865   6
   0  -5  -2 13656.5 91.5199   4
   0  -5  -3 3228.50 87.3082   1
   0   5   3 2990.51 86.8150   6
   0  -5  -4 239.423 33.8136   1
   0   5   4 248.020 30.1640   6
   0  -5  -5 477.614 42.7177   1
   0   5   5 489.498 42.7863   6
   0  -5  -6 269.533 37.5742   1
   0   5   6 295.352 36.1850   6
   0   5   7 344.814 40.7940   6
   0  -5  -7 330.741 41.7001   1
   0  -5  -8 393.646 43.5360   1
   0   5   8 411.746 44.7163   6
   0  -5  -9 84.6902 29.7929   1
   0   5   9 124.555 30.8281   6
   0  -5 -10 364.065 45.8831   1
   0   5  10 433.286 47.8843   6
   0   5  11 17.8063 26.5990   6
   0  -5 -11 29.0171 32.6171   1
   0  -5 -12 895.474 78.1312   1
   0   5  12 1002.18 75.9163   6
   0  -5 -13 194.451 52.8726   1
   0   5  13 11.1457 28.5695   6
   0   5  14 110.796 38.8031   6
   0  -5 -14 128.271 45.4930   1
   0   5  15 13.1065 34.0647   6
   0  -5 -15 97.8357 49.3283   1
   0  -5 -16 479.365 77.5068   1
   0   5  16 95.0827 39.4256   6
   0   5  17 40.3454 39.2728   6
   0  -5 -17 333.443 79.8196   1
   0  -6  19 1549.99 104.287   3
   0  -6  19 1348.65 107.933   2
   0   6 -19 1319.27 96.6297   5
   0  -6  18 1418.84 97.2558   3
   0   6 -18 1167.84 86.9837   5
   0  -6  17 814.390 73.5466   3
   0   6 -17 791.948 70.4537   5
   0  -6  16 194.995 42.2574   3
   0   6 -16 178.251 37.9538   5
   0  -6  16 262.173 39.0180   6
   0  -6  15 153.099 36.2708   3
   0   6 -15 171.034 36.3401   5
   0  -6  14-15.8407 27.5538   3
   0   6 -14-37.3388 26.2447   5
   0  -6  13 62.7566 29.1916   3
   0   6 -13 41.7085 22.8549   5
   0  -6  12 51.6842 27.6508   3
   0   6 -12 18.7801 23.0397   4
   0   6 -12 20.2348 19.6372   5
   0   6 -11 1354.84 78.0770   4
   0   6 -11 1261.50 67.5068   5
   0  -6  11 1236.44 68.7749   3
   0  -6  10 153.713 27.0620   3
   0   6 -10 172.727 33.1718   4
   0   6 -10 187.315 30.2564   5
   0   6  -9-2.14898 20.1984   5
   0   6  -9 17.1090 22.7993   4
   0  -6   8 2455.54 81.5564   3
   0   6  -8 2378.92 81.0493   5
   0   6  -8 2429.75 91.8964   4
   0  -6   7 1598.09 55.7357   6
   0   6  -7 1549.53 64.4872   5
   0   6  -7 1505.28 72.1388   4
   0  -6   7 1417.06 60.1336   3
   0  -6   6 2401.68 75.7371   3
   0   6  -6 2403.84 84.3358   4
   0  -6   6 2451.93 65.7524   6
   0   6  -6 2413.25 77.6450   5
   0   6  -5 731.094 46.8919   4
   0  -6   5 737.186 43.6867   3
   0  -6   5 744.728 37.9757   6
   0   6  -5 743.063 44.3301   5
   0  -6   4 1.28296 14.3846   3
   0  -6   4 28.1419 16.5964   6
   0   6  -4 9.42793 14.7158   6
   0   6  -4 27.5854 21.0887   4
   0   6  -4 39.6009 19.6751   5
   0   6  -3 54.8586 21.0691   5
   0  -6   3 63.6580 18.3388   6
   0   6  -3 49.8043 21.8892   4
   0   6  -3 76.2369 20.1372   6
   0   6  -2 11.1101 17.0197   4
   0  -6   2 22.2654 15.9989   4
   0   6  -2 2.45101 18.6922   5
   0  -6   2-16.9688 13.1886   6
   0   6  -2 12.6275 16.1077   6
   0  -6   1 10.6590 10.8404   4
   0  -6   1 22.5241 14.9233   1
   0  -6   1 25.5993 15.9980   6
   0   6  -1 14.0190 17.4899   6
   0   6  -1-15.7296 17.5872   5
   0   6  -1-5.09525 15.6827   4
   0   6   0 2680.79 79.6817   5
   0   6   0 2689.94 75.6437   6
   0  -6   0 2811.08 75.1697   1
   0  -6   0 2817.21 62.3354   4
   0  -6  -1 273.812 19.5590   4
   0   6   1 239.976 29.8577   6
   0  -6  -1 271.087 28.3828   1
   0  -6  -2 1639.50 64.4424   1
   0   6   2 1731.06 66.3307   6
   0  -6  -2 1705.14 38.1971   4
   0   6   3 0.26226 18.9462   6
   0  -6  -3 26.0690 6.08215   2
   0  -6  -3 3.76667 5.03309   4
   0  -6  -3-10.6700 21.3050   1
   0   6   4 456.320 41.0958   6
   0  -6  -4 438.770 43.9352   1
   0   6   5 1379.03 69.5982   6
   0  -6  -5 1359.24 69.2507   1
   0   6   6 298.515 39.6882   6
   0  -6  -6 286.709 37.8632   1
   0   6   7 1.90421 22.9035   6
   0  -6  -7 8.57063 23.2484   1
   0  -6  -8 25.6531 28.5709   1
   0   6   8-12.0845 23.3190   6
   0   6   9 36.6594 27.0124   6
   0  -6  -9 50.6773 28.7710   1
   0   6  10-1.95140 27.3568   6
   0  -6 -10-55.2396 38.7200   1
   0   6  11 103.527 35.9078   6
   0  -6 -11 61.7447 31.2133   1
   0   6  12 830.683 73.1420   6
   0  -6 -12 828.415 75.9269   1
   0  -6 -13 831.847 80.6847   1
   0   6  13 1026.33 82.0959   6
   0   6  14 566.411 69.7310   6
   0  -6 -14 485.989 69.7337   1
   0   6  15 60.5888 39.0627   6
   0  -6 -15 112.232 51.4933   1
   0   6  16 63.6456 36.2738   6
   0  -6 -16 19.4346 60.1755   1
   0  -7  19 538.540 78.1396   2
   0  -7  19 699.420 75.8925   3
   0   7 -18 232.980 46.1181   5
   0  -7  18 264.752 51.7634   3
   0  -7  17 298.343 49.1053   3
   0   7 -17 284.932 47.6439   5
   0  -7  16 557.168 59.1561   3
   0   7 -16 467.506 56.1588   5
   0  -7  15 62.6088 29.7164   3
   0   7 -15 30.0780 26.2205   5
   0  -7  14 290.678 44.3183   3
   0   7 -14 286.633 44.7657   5
   0   7 -13 317.530 42.0226   5
   0  -7  13 279.050 41.9353   3
   0  -7  12 1212.57 70.1181   3
   0   7 -12 1286.23 73.6523   5
   0   7 -11 1102.08 65.1389   5
   0  -7  11 960.492 61.0026   3
   0   7 -11 1076.11 74.8143   4
   0   7 -10 1557.27 74.0590   5
   0  -7  10 1682.61 76.4316   3
   0   7 -10 1497.26 82.9980   4
   0   7  -9 2891.31 97.1867   5
   0   7  -9 2898.03 107.925   4
   0  -7   9 2764.31 96.6161   3
   0   7  -8 880.913 64.1221   4
   0  -7   8 664.607 47.2807   3
   0   7  -8 914.219 64.0718   5
   0  -7   7 3764.08 101.741   3
   0   7  -7 3686.69 113.994   4
   0   7  -7 3924.35 106.690   5
   0   7  -6 7154.54 151.510   4
   0   7  -6 7828.33 146.052   5
   0  -7   6 7726.84 141.418   3
   0  -7   6 7681.40 122.625   6
   0  -7   5 5954.48 108.235   6
   0   7  -5 5525.82 127.193   4
   0   7  -5 5651.35 120.975   5
   0  -7   5 5557.90 117.174   3
   0  -7   4 13.6240 14.9487   3
   0   7  -4 32.5961 20.1265   5
   0   7  -4 59.2513 23.6686   4
   0   7  -4 3.29310 16.0049   6
   0  -7   4 38.4380 16.9591   6
   0   7  -3 2328.15 79.5873   5
   0   7  -3 2440.54 77.2188   4
   0   7  -3 2292.35 71.0207   6
   0   7  -2 26170.6 236.744   6
   0   7  -2 25759.6 252.073   5
   0   7  -2 26042.5 232.720   4
   0  -7   2 26257.1 230.085   1
   0   7  -1 990.021 58.0747   5
   0   7  -1 959.815 54.0249   6
   0  -7   1 1287.73 57.6220   4
   0  -7   1 1173.55 56.2401   1
   0  -7   0 833.007 38.4033   4
   0   7   0 751.510 46.5438   6
   0  -7   0 778.376 45.7647   1
   0  -7  -1 1296.65 59.1412   1
   0  -7  -1 1388.37 43.1986   4
   0   7   1 1263.68 60.4047   6
   0   7   2 785.083 52.8322   6
   0  -7  -2 788.480 51.5728   1
   0  -7  -2 772.178 29.7031   4
   0  -7  -3 3994.41 53.6087   4
   0  -7  -3 4416.16 116.014   1
   0   7   3 4254.33 117.792   6
   0  -7  -3 4105.12 53.7861   2
   0  -7  -3 4000.89 54.3805   2
   0   7   4 8303.00 167.471   6
   0  -7  -4 8234.23 162.855   1
   0   7   5 14326.2 224.431   6
   0  -7  -5 14401.2 225.064   1
   0   7   6 4910.68 139.417   6
   0  -7  -6 4979.02 137.708   1
   0  -7  -7 790.251 61.2772   1
   0   7   7 771.150 60.8659   6
   0  -7  -8 78.3521 32.6093   1
   0   7   8 100.682 32.7762   6
   0  -7  -9 113.262 36.5134   1
   0   7   9 150.888 40.5824   6
   0  -7 -10 1622.34 93.3474   1
   0   7  10 1681.58 95.9908   6
   0   7  11 4742.76 163.478   6
   0  -7 -11 4619.04 162.562   1
   0   7  12 747.862 72.5827   6
   0  -7 -12 599.922 67.8107   1
   0   7  13 863.057 81.5541   6
   0  -7 -13 810.579 79.6699   1
   0   7  14 962.430 87.8524   6
   0  -7 -14 981.041 94.4333   1
   0   7  15 329.416 56.3682   6
   0  -7 -15 340.532 79.8658   1
   0   8 -18 152.528 41.6556   5
   0  -8  18 128.172 43.0404   3
   0   8 -17 321.019 49.8341   5
   0  -8  17 207.196 44.9970   3
   0  -8  16 99.5419 35.7912   3
   0   8 -16 93.1153 34.2773   5
   0  -8  15 561.190 59.1915   3
   0   8 -15 579.766 59.0816   5
   0   8 -14 181.210 38.9395   5
   0  -8  14 205.733 41.5748   3
   0   8 -13 1246.40 75.6100   5
   0  -8  13 1119.25 75.8386   3
   0  -8  12 1265.30 73.1951   3
   0   8 -12 1325.45 75.2090   5
   0  -8  11 233.408 39.0061   3
   0   8 -11 171.168 30.9031   5
   0  -8  10 2185.90 90.0397   3
   0   8 -10 2088.89 89.4387   5
   0   8 -10 2065.33 99.9581   4
   0   8  -9 818.072 57.5352   5
   0   8  -9 821.001 63.1341   4
   0  -8   9 749.766 52.6784   3
   0   8  -8 83.6208 26.4561   5
   0   8  -8 66.6818 26.6510   4
   0  -8   8-2.52066 22.4391   3
   0   8  -7 284.436 35.0257   5
   0  -8   7 345.180 36.1540   3
   0   8  -7 260.325 36.6175   4
   0  -8   6 17.8301 15.0124   3
   0   8  -6 17.7034 19.7100   5
   0   8  -6 38.0434 23.9794   4
   0  -8   5 135.276 24.7062   3
   0   8  -5 98.1614 26.6212   4
   0   8  -5 109.136 24.1878   5
   0   8  -4 120.224 26.1633   5
   0   8  -4 211.292 33.0103   4
   0   8  -4 126.496 23.9249   6
   0  -8   4 169.886 27.9591   3
   0  -8   3 13721.5 176.271   1
   0   8  -3 13520.1 179.703   6
   0   8  -3 13397.8 198.285   5
   0   8  -2 3712.02 98.7838   6
   0  -8   2 3813.05 96.7997   1
   0   8  -2 3698.89 105.551   5
   0   8  -1 1048.24 59.4856   5
   0  -8   1 919.804 52.8259   1
   0   8  -1 975.542 59.4819   6
   0   8   0 1855.52 76.2593   6
   0  -8   0 2000.88 76.8970   1
   0  -8   0 2121.36 61.5484   4
   0  -8  -1 280.371 23.5124   4
   0  -8  -1 267.718 31.4238   1
   0   8   1 254.353 32.7830   6
   0   8   2 24.0097 21.2769   6
   0  -8  -2 2.04974 9.74467   4
   0  -8  -3 251.232 16.6823   4
   0  -8  -3 216.653 31.7803   1
   0  -8  -3 251.453 16.6821   2
   0   8   3 241.131 33.9618   6
   0  -8  -4 26.5707 24.0664   1
   0   8   4 16.2401 22.1026   6
   0  -8  -5 837.887 61.5629   1
   0   8   5 833.255 60.4508   6
   0   8   6 1512.19 83.0139   6
   0  -8  -6 1477.41 83.5302   1
   0  -8  -7 1552.82 86.8766   1
   0   8   7 1551.15 88.2568   6
   0   8   8 28.3958 27.2785   6
   0  -8  -8 37.1230 28.9102   1
   0   8   9 176.822 40.9956   6
   0  -8  -9 179.924 43.6202   1
   0  -8 -10 353.725 51.1377   1
   0   8  10 418.448 57.1070   6
   0  -8 -11 60.1129 43.6762   1
   0   8  11 165.496 42.9493   6
   0  -8 -12 7.64844 37.5022   1
   0   8  12 45.0601 31.9890   6
   0  -8 -13-69.2418 49.7608   1
   0   8  13 18.1336 28.9717   6
   0  -8 -14 734.477 85.8279   1
   0   8  14 660.367 81.1088   6
   0   8  15-21.1481 37.5884   6
   0  -9  18 99.8590 40.2530   3
   0  -9  17 451.055 59.0365   3
   0   9 -17 398.871 55.7314   5
   0   9 -16 72.8482 34.5018   5
   0  -9  16 54.6442 34.1291   3
   0   9 -15 46.1418 27.8648   5
   0  -9  15 66.6979 30.7871   3
   0  -9  14 11.8741 26.2811   3
   0   9 -14-6.39456 24.0779   5
   0  -9  13-29.3162 29.1317   3
   0   9 -13-31.2462 27.7758   5
   0   9 -12 467.756 49.9406   5
   0  -9  12 621.605 59.2102   3
   0   9 -11 305.917 41.7513   5
   0  -9  11 339.060 42.9995   3
   0   9 -10 253.554 39.4147   5
   0  -9  10 249.361 36.3018   3
   0  -9   9 74.6628 20.0199   3
   0   9  -9 122.437 30.4373   5
   0   9  -8-14.1826 21.2502   5
   0   9  -8-4.32143 22.4656   4
   0   9  -7 130.669 28.3057   5
   0  -9   7 134.867 27.4800   3
   0   9  -7 156.566 32.7268   4
   0   9  -6 131.814 29.6770   4
   0   9  -6 130.313 27.0041   5
   0  -9   6 137.394 25.7868   3
   0   9  -5 59.1339 21.6821   6
   0   9  -5 26.8249 23.3854   5
   0  -9   5 51.8696 21.8014   3
   0  -9   4 4001.86 112.988   3
   0   9  -4 3915.39 113.980   5
   0   9  -4 3859.01 103.870   6
   0  -9   3 740.998 47.3911   1
   0   9  -3 658.649 46.6973   6
   0   9  -3 731.577 51.6892   5
   0   9  -2 203.143 31.5547   5
   0  -9   2 184.635 28.3431   1
   0   9  -2 190.556 30.4795   6
   0  -9   1 128.133 24.5258   1
   0   9  -1 101.574 25.2438   6
   0   9  -1 120.747 28.7996   5
   0   9   0 106.510 29.4442   6
   0  -9   0 156.939 27.0919   1
   0  -9  -1 1757.11 54.9601   4
   0  -9  -1 1775.56 77.5189   1
   0   9   1 1751.11 79.4488   6
   0   9   2 154.799 31.3679   6
   0  -9  -2 138.891 17.2387   4
   0  -9  -2 85.9484 22.7236   1
   0  -9  -3 109.591 13.4560   2
   0  -9  -3 139.714 14.7355   4
   0   9   3 116.837 28.2546   6
   0  -9  -3 107.899 27.3621   1
   0  -9  -4 27.8928 5.87695   4
   0  -9  -4 47.0111 25.7277   1
   0  -9  -4 30.4992 6.28632   2
   0  -9  -4 1.60770 4.62389   2
   0   9   4 59.4152 26.7595   6
   0  -9  -5 52.8758 28.1625   1
   0   9   5 45.0675 27.1791   6
   0   9   6 874.348 68.2949   6
   0  -9  -6 852.736 67.1178   1
   0   9   7 632.361 60.2105   6
   0  -9  -7 642.496 64.4876   1
   0  -9  -8 961.964 77.6601   1
   0   9   8 1080.21 79.4883   6
   0  -9  -9 995.674 80.1332   1
   0   9   9 830.499 73.7677   6
   0  -9 -10 12.5338 42.4956   1
   0   9  10 96.2674 34.1401   6
   0   9  11 11.6482 31.9532   6
   0  -9 -11-4.36110 35.9724   1
   0   9  12-19.0974 32.8026   6
   0  -9 -12 51.8507 41.5995   1
   0   9  13 18.0515 39.3033   6
   0  -9 -13-79.4386 54.9012   1
   0   9  14 318.580 58.1487   6
   0  10 -17 1507.42 99.4775   5
   0 -10  17 1483.06 99.8698   3
   0  10 -16 1250.64 88.3092   5
   0 -10  16 1254.58 87.9398   3
   0  10 -15 1238.56 86.3174   5
   0 -10  15 1202.71 83.5677   3
   0  10 -14 504.194 56.7746   5
   0 -10  14 458.059 54.8931   3
   0 -10  13 766.339 66.1607   3
   0  10 -13 575.651 58.5202   5
   0  10 -12 534.719 54.5650   5
   0 -10  12 621.790 61.2654   3
   0  10 -11-3.75709 24.2997   5
   0 -10  11 31.6288 27.9670   3
   0 -10  10 564.739 54.2076   3
   0  10 -10 680.965 58.6067   5
   0  10  -9 2073.14 94.7827   5
   0 -10   9 1764.07 86.1101   3
   0  10  -8 1343.19 75.1967   5
   0 -10   8 1234.20 70.5273   3
   0  10  -7 1990.16 90.4103   5
   0 -10   7 1975.15 86.5310   3
   0  10  -6 1149.28 70.0069   5
   0 -10   6 1103.52 67.3680   3
   0 -10   5 3150.78 108.503   3
   0  10  -5 3121.36 98.0094   6
   0  10  -5 3090.36 108.869   5
   0  10  -4 833.758 54.0181   6
   0  10  -4 763.388 58.0075   5
   0 -10   4 804.538 51.2504   1
   0 -10   4 770.317 53.8997   3
   0  10  -3 419.387 45.3715   5
   0 -10   3 401.744 37.5098   1
   0  10  -3 362.343 38.3253   6
   0 -10   2 721.691 49.1061   1
   0  10  -2 643.932 49.5756   6
   0  10  -2 656.949 54.1057   5
   0  10  -1 167.643 32.3471   6
   0 -10   1 174.367 28.4738   1
   0 -10   0 319.147 38.0995   1
   0  10   0 382.030 44.8325   6
   0  10   1 522.792 51.9804   6
   0 -10  -1 660.541 53.7198   1
   0 -10  -2 291.756 38.5495   1
   0 -10  -2 350.027 26.4405   4
   0  10   2 369.250 45.5653   6
   0 -10  -3 1098.45 70.1057   1
   0  10   3 1208.79 76.6759   6
   0 -10  -3 1032.81 37.0572   2
   0 -10  -3 1030.64 37.2943   2
   0 -10  -4 373.770 45.0354   1
   0  10   4 330.278 43.1060   6
   0 -10  -4 226.593 14.0056   2
   0 -10  -5 1535.59 88.2592   1
   0  10   5 1425.99 85.2194   6
   0  10   6 1172.28 82.9510   6
   0 -10  -6 1183.39 82.3406   1
   0  10   7 29.3714 27.4046   6
   0 -10  -7 42.8022 34.8419   1
   0 -10  -8 299.649 52.8127   1
   0  10   8 264.379 45.8069   6
   0  10   9 400.079 59.4294   6
   0 -10  -9 314.378 52.3417   1
   0 -10 -10 265.133 51.6283   1
   0  10  10 294.832 54.6995   6
   0  10  11 716.724 80.6512   6
   0 -10 -11 713.186 78.4159   1
   0  10  12 612.223 73.4475   6
   0 -10 -12 424.548 68.3112   1
   0 -11  16 43.4841 31.7354   3
   0  11 -16 53.6604 37.7812   5
   0 -11  15 22.0071 31.4132   3
   0  11 -15 93.4323 38.1267   5
   0 -11  14 103.239 39.1081   3
   0  11 -14 17.5917 27.8659   5
   0 -11  13 305.801 51.8546   3
   0  11 -13 270.285 45.0371   5
   0 -11  12 1557.47 91.4055   3
   0  11 -12 1629.05 93.3056   5
   0  11 -11 1329.88 83.6053   5
   0 -11  11 1205.11 79.5856   3
   0 -11  10 1112.28 73.8756   3
   0  11 -10 1269.53 81.1500   5
   0  11  -9 1313.74 80.8494   5
   0 -11   9 1116.42 71.5293   3
   0 -11   8 219.963 37.6636   3
   0  11  -8 223.460 40.8525   5
   0  11  -7 351.873 45.5443   5
   0 -11   7 363.490 43.6005   3
   0 -11   6 2814.97 107.773   3
   0  11  -6 2832.12 110.899   5
   0 -11   5 5449.53 134.300   1
   0 -11   5 5481.16 150.013   3
   0  11  -5 5325.57 135.471   6
   0  11  -5 5396.90 149.442   5
   0 -11   4 102.440 30.0859   1
   0  11  -4 100.954 30.7088   5
   0  11  -4 49.8734 22.7751   6
   0  11  -3 205.574 36.2998   6
   0  11  -3 294.900 40.8442   5
   0 -11   3 280.578 35.6851   1
   0 -11   2 2707.22 99.5421   1
   0  11  -2 2620.38 107.094   5
   0  11  -2 2570.69 100.643   6
   0 -11   1 123.916 27.1360   1
   0  11  -1 181.604 41.1114   6
   0  11   0 2416.46 102.648   6
   0 -11   0 2524.93 101.068   1
   0  11   1 4055.53 133.456   6
   0 -11  -1 3912.88 127.491   1
   0 -11  -2 1035.79 70.0094   1
   0 -11  -2 1039.35 44.6211   2
   0  11   2 1095.82 74.5286   6
   0  11   3 970.501 70.5715   6
   0 -11  -3 926.006 36.7685   2
   0 -11  -3 983.905 70.3959   1
   0 -11  -4 1228.47 80.5575   1
   0  11   4 1188.08 81.8751   6
   0  11   5 2802.68 125.374   6
   0 -11  -5 2790.57 122.637   1
   0 -11  -6 1798.81 103.652   1
   0  11   6 1828.02 103.188   6
   0 -11  -7 1701.80 103.905   1
   0  11   7 1835.36 107.450   6
   0  11   8 1929.72 112.749   6
   0 -11  -8 1831.66 111.728   1
   0 -11  -9 25.1912 34.3052   1
   0  11   9 50.5773 33.5236   6
   0 -11 -10 185.930 54.9004   1
   0  11  10 165.481 45.8971   6
   0  11  11 1290.28 101.435   6
   0 -11 -11 1211.02 103.761   1
   0 -12  16 562.216 66.3671   3
   0 -12  15 203.649 40.9742   3
   0  12 -15 303.158 49.4450   5
   0  12 -14 118.067 37.6852   5
   0 -12  14 220.522 48.2937   3
   0 -12  13 470.507 60.1487   3
   0  12 -13 399.369 55.3109   5
   0 -12  12 24.3507 27.4339   3
   0  12 -12 37.1102 31.7552   5
   0  12 -11 275.621 45.0676   5
   0 -12  11 262.373 42.3318   3
   0  12 -10 209.115 39.3149   5
   0 -12  10 32.9188 33.3996   3
   0 -12   9 77.7699 23.6186   3
   0  12  -9 173.396 38.6493   5
   0  12  -8 412.161 51.6575   5
   0 -12   8 368.237 44.7995   3
   0 -12   7 336.792 44.2121   3
   0 -12   7 406.928 46.2225   1
   0  12  -7 340.623 47.6981   5
   0 -12   6 6647.94 172.153   3
   0  12  -6 6604.08 175.540   5
   0 -12   6 6915.78 155.520   1
   0 -12   5 5303.64 156.703   3
   0  12  -5 5491.49 143.425   6
   0  12  -5 5351.76 157.815   5
   0 -12   5 5446.83 140.023   1
   0 -12   4 1206.15 69.7849   1
   0  12  -4 1203.77 76.7138   5
   0  12  -4 1216.93 71.6479   6
   0 -12   3 572.579 49.8507   1
   0  12  -3 568.913 50.1915   6
   0  12  -3 527.791 54.6568   5
   0 -12   2 9.69651 18.9884   1
   0  12  -2-21.9693 24.4157   6
   0 -12   1-0.75470 18.7940   1
   0  12  -1 29.5018 30.3313   6
   0  12   0 12.4871 27.9763   6
   0 -12   0 106.573 32.2962   1
   0 -12  -1 113.021 32.8814   1
   0  12   1 118.336 39.2478   6
   0  12   2 745.717 65.7660   6
   0 -12  -2 684.507 60.4265   1
   0 -12  -2 700.217 38.9616   2
   0  12   3 1781.62 100.178   6
   0 -12  -3 1729.34 96.3026   1
   0 -12  -4 1224.75 84.0369   1
   0  12   4 1252.64 87.3386   6
   0 -12  -5 769.440 72.1351   1
   0  12   5 716.126 69.8736   6
   0 -12  -6 648.897 67.9109   1
   0  12   6 569.582 66.6671   6
   0  12   7 459.475 64.9744   6
   0 -12  -7 483.685 66.2917   1
   0  12   8 125.022 43.4054   6
   0 -12  -8 117.785 42.8380   1
   0 -12  -9 1.63245 36.1561   1
   0  12   9 14.2667 36.2965   6
   0 -12 -10-19.5626 46.6259   1
   0  12  10 9.81705 32.4691   6
   0 -13  15 203.573 44.2366   3
   0  13 -15 95.4781 41.5018   5
   0  13 -14 22.5291 33.5660   5
   0 -13  14 118.055 44.9908   3
   0  13 -13 534.503 61.6995   5
   0 -13  13 625.201 68.5921   3
   0  13 -12 139.232 39.8183   5
   0 -13  12 128.347 40.6652   3
   0 -13  11 32.9721 28.8969   3
   0  13 -11 123.257 36.7697   5
   0  13 -10 72.0490 32.8186   5
   0 -13  10-26.7802 38.2275   3
   0  13  -9 14.0235 27.3520   5
   0 -13   9 7.99651 25.3359   3
   0  13  -8 121.880 35.1696   5
   0 -13   8 145.382 34.4149   3
   0 -13   7 570.798 51.0674   1
   0  13  -7 546.212 59.0686   5
   0 -13   7 500.801 54.1712   3
   0 -13   6 30.4600 26.3414   3
   0  13  -6 38.0957 26.8319   5
   0 -13   6 57.6986 24.3627   1
   0 -13   5-26.8104 20.6714   1
   0  13  -5 20.8622 25.7946   5
   0 -13   5-44.4370 33.7639   3
   0  13  -5 31.8998 23.4781   6
   0 -13   4 78.2230 25.6096   1
   0  13  -4 36.8849 25.8020   5
   0  13  -4 61.0792 27.2355   6
   0  13  -3 534.430 58.7568   5
   0  13  -3 526.240 52.2639   6
   0 -13   3 521.810 50.6397   1
   0 -13   2 144.611 30.1665   1
   0  13  -2 146.283 34.1143   6
   0  13  -1 25.0483 26.1452   6
   0 -13   1 53.1057 25.7328   1
   0  13   0 1.40947 25.3939   6
   0 -13   0-64.0211 32.2614   1
   0 -13  -1 73.5874 26.0236   1
   0  13   1 98.3511 34.5471   6
   0 -13  -2 2042.06 105.062   1
   0  13   2 2139.19 110.572   6
   0  13   3 1784.99 104.733   6
   0 -13  -3 1806.72 101.642   1
   0  13   4 121.508 39.0653   6
   0 -13  -4 155.649 41.1995   1
   0  13   5 216.365 48.8400   6
   0 -13  -5 228.948 47.6196   1
   0 -13  -6-17.1760 37.9004   1
   0  13   6 3.49657 30.2429   6
   0  13   7 20.8536 33.8287   6
   0 -13  -7-4.84445 38.5541   1
   0 -13  -8 51.4649 35.7832   1
   0  13   8 58.3881 37.9181   6
   0 -13  -9-5.52425 44.9325   1
   0  13   9 7.12897 33.0085   6
   0  14 -14 105.029 42.5659   5
   0 -14  14 144.360 46.8417   3
   0 -14  13 224.624 50.9345   3
   0  14 -13 197.772 45.8396   5
   0  14 -12 65.4303 37.1030   5
   0 -14  12 61.8414 32.2748   3
   0  14 -11 12.3340 32.3641   5
   0 -14  11-37.1316 39.4894   3
   0 -14  10-75.5218 42.0745   3
   0  14 -10 69.9710 33.7881   5
   0  14  -9-9.18071 30.3164   5
   0 -14   9 36.8755 32.5038   3
   0 -14   8 314.448 48.0163   3
   0  14  -8 351.335 52.4873   5
   0 -14   8 442.034 47.7208   1
   0 -14   7 315.772 46.7869   3
   0 -14   7 412.858 48.7146   1
   0  14  -7 322.446 51.2192   5
   0  14  -6 189.695 40.1111   5
   0 -14   6 187.399 37.1699   3
   0 -14   6 216.919 34.8194   1
   0  14  -6 217.490 37.6409   6
   0  14  -5 149.542 35.8953   6
   0  14  -5 174.335 42.7575   5
   0 -14   5 91.3154 27.0043   3
   0 -14   5 125.005 30.0307   1
   0 -14   4 255.122 41.9192   3
   0  14  -4 262.389 40.4919   6
   0 -14   4 333.547 42.2276   1
   0  14  -4 305.625 49.4254   5
   0  14  -3 16.2005 25.2338   6
   0 -14   3 27.9361 21.7495   1
   0 -14   2-4.23372 25.3148   1
   0  14  -2 2.90510 27.0833   6
   0  14  -1 105.379 35.1473   6
   0 -14   1 82.6338 27.4501   1
   0 -14   0-50.6599 36.2235   1
   0  14   0 59.9728 30.6795   6
   0 -14  -1 20.5265 29.7056   1
   0  14   1 28.2169 30.4645   6
   0 -14  -2 81.5175 32.5925   1
   0  14   2 110.132 39.5468   6
   0 -14  -3 21.4601 32.4675   1
   0  14   3-10.5246 32.1087   6
   0 -14  -4 148.266 40.3631   1
   0  14   4 139.974 46.5616   6
   0 -14  -5 44.5410 34.6931   1
   0  14   5 30.2080 36.9828   6
   0  14   6 9.84322 33.6997   6
   0 -14  -6-26.2637 40.3684   1
   0 -14  -7 130.587 49.8241   1
   0  14   7 123.040 43.5587   6
   0 -15  13 70.5033 42.9056   3
   0  15 -13 22.5291 34.7079   5
   0 -15  12 473.682 61.9908   3
   0  15 -12 575.154 68.3537   5
   0  15 -11 251.965 52.4903   5
   0 -15  11 89.6455 35.7870   3
   0 -15  10 109.103 29.2061   3
   0  15 -10 254.000 49.4635   5
   0 -15   9 859.923 75.5939   3
   0  15  -9 855.643 77.9794   5
   0 -15   8 506.115 59.5226   3
   0  15  -8 475.701 60.2239   5
   0  15  -7 547.591 65.0455   5
   0 -15   7 362.323 55.2119   3
   0 -15   7 530.236 53.3156   1
   0 -15   6 224.221 51.7962   3
   0 -15   6 249.391 45.3917   1
   0  15  -6 259.805 50.4753   5
   0 -15   5 2347.01 108.956   1
   0  15  -5 2490.57 115.111   6
   0  15  -5 2441.73 123.135   5
   0 -15   5 2405.37 121.643   3
   0 -15   4 45.7692 27.7408   3
   0  15  -4 91.5842 34.6363   6
   0 -15   4 95.0620 29.4032   1
   0 -15   3 500.805 53.4988   1
   0  15  -3 454.900 56.8184   6
   0 -15   2 484.350 55.0477   1
   0  15  -2 499.578 59.4989   6
   0  15  -1 1203.25 88.3182   6
   0 -15   1 1134.93 80.2261   1
   0 -15   0 1573.24 95.8408   1
   0  15   0 1629.67 103.715   6
   0  15   1 240.992 52.1793   6
   0 -15  -1 195.057 42.2140   1
   0 -15  -2 488.507 60.7512   1
   0  15   2 538.504 65.5689   6
   0 -15  -3 165.976 44.6722   1
   0  15   3 99.8260 40.8353   6
   0 -15  -4 97.8626 44.1366   1
   0  15   4 147.956 42.6109   6
   0 -15  -5 188.139 51.2014   1
   0  15   5 68.6859 38.3831   6
   0 -15  -6 50.8223 42.6763   1
   0  15   6 18.7537 35.1686   6
   0  16 -12 347.211 59.2115   5
   0 -16  12 250.374 45.3716   3
   0 -16  11-60.8489 54.7287   3
   0  16 -11-18.5266 32.9878   5
   0  16 -10-6.47416 31.2760   5
   0 -16  10-113.881 52.4155   3
   0 -16   9 267.265 55.1878   3
   0  16  -9 152.950 43.5746   5
   0 -16   8 133.227 44.2682   3
   0  16  -8 158.090 44.1581   5
   0  16  -7 428.932 61.0170   5
   0 -16   7 390.962 56.7994   3
   0 -16   6 57.5328 25.0154   1
   0  16  -6 158.866 44.3560   5
   0 -16   6 114.597 36.4106   3
   0 -16   5 184.036 37.5539   1
   0  16  -5 271.280 46.7871   6
   0 -16   5 135.568 38.9825   3
   0  16  -4 201.272 44.5796   6
   0 -16   4 142.128 32.7666   1
   0 -16   4 148.572 34.7791   3
   0 -16   3 127.772 30.1795   1
   0  16  -3 256.329 46.9081   6
   0 -16   2-75.3596 40.3566   1
   0  16  -2 61.7092 36.8542   6
   0 -16   1-38.0678 37.8504   1
   0  16  -1 34.8733 35.3508   6
   0  16   0 205.685 49.6019   6
   0 -16   0 110.033 30.0037   1
   0 -16  -1 230.206 44.2924   1
   0  16   1 300.528 57.6854   6
   0  16   2 49.7006 35.6381   6
   0 -16  -2 16.1986 37.1365   1
   0 -16  -3-1.29832 37.9632   1
   0  16   3 3.79090 32.7595   6
   0 -16  -4 24.9485 34.9476   1
   0  16   4 0.63500 33.6665   6
   0  17 -11 834.869 84.8397   5
   0 -17  11 617.878 71.6795   3
   0 -17  10 216.837 52.4683   3
   0  17 -10 389.970 64.7744   5
   0  17  -9 296.229 58.8398   5
   0 -17   9 469.163 72.4461   3
   0 -17   8 360.870 60.9412   3
   0  17  -8 346.538 62.2337   5
   0 -17   7 77.3007 34.3660   3
   0  17  -7 0.23905 34.8818   5
   0 -17   6 36.8073 31.4428   3
   0 -17   5 76.8275 41.4312   3
   0 -17   4 185.408 50.1321   3
   0  17  -4 217.951 48.8040   6
   0 -17   4 149.822 33.1792   1
   0  17  -3 523.491 63.2069   6
   0 -17   3 450.467 52.4669   1
   0 -17   2 435.311 50.5976   1
   0  17  -2 573.292 67.7174   6
   0  17  -1 157.404 46.4122   6
   0 -17   1 130.895 34.5359   1
   0 -17   0 369.529 55.0109   1
   0  17   0 570.542 72.8517   6
   0  17   1 999.436 91.8628   6
   0 -17  -1 971.375 85.8435   1
   0 -17  -2 81.7999 40.5398   1
   0  17   2 80.9694 41.5913   6
   0 -18   8-59.0426 39.3735   2
   0  18  -2 116.056 49.6531   6
   0 -18   2 1.25598 40.0983   1
   0 -18   1 26.6982 37.0638   1
   0  18  -1 190.086 51.7884   6
   1 -18   1 314.327 52.9786   1
  -1  18  -1 406.440 63.0347   6
   1 -18   2 350.549 54.6425   1
  -1  18  -2 416.082 66.9547   6
   1 -18   3 59.9102 29.8444   1
  -1  18  -3 107.710 44.3023   6
  -1  18  -4 361.575 58.4488   6
   1 -18   4 301.297 49.9156   1
   1 -18   4 124.534 33.9572   3
   1 -18   5-5.10657 36.0257   3
   1 -18   6 563.690 68.7340   3
   1 -18   7 481.803 60.2545   2
   1 -18   7 406.722 59.1279   3
   1 -18   8 252.967 51.5955   3
   1 -18   8 254.662 46.0493   2
   1 -17  -2-39.5818 38.3062   1
  -1  17   2-23.1251 33.4385   6
   1 -17  -1-23.5074 37.6240   1
  -1  17   1 121.238 46.6636   6
   1 -17   0 241.931 50.3512   1
  -1  17   0 353.976 59.2167   6
   1 -17   1 26.3287 32.2586   1
  -1  17  -1 132.137 41.9087   6
   1 -17   2 107.541 37.9032   1
  -1  17  -2 18.5810 35.8209   6
  -1  17  -3 35.4852 36.9037   6
   1 -17   3 35.5783 30.6994   1
   1 -17   4 487.493 58.7120   1
  -1  17  -4 461.283 60.4936   6
   1 -17   4 333.031 45.8605   3
   1 -17   5 219.393 43.3879   3
  -1  17  -5 364.772 55.2864   6
   1 -17   5 348.644 49.9258   1
   1 -17   5 296.972 45.3081   2
   1 -17   6-5.88718 23.4973   1
   1 -17   6 9.47161 25.7144   3
   1 -17   6 49.6293 28.1111   2
   1 -17   7 452.838 55.3513   2
   1 -17   7 481.603 61.8565   3
   1 -17   8 26.7173 28.6654   2
  -1  17  -8 49.3768 34.1340   5
   1 -17   8 106.275 37.2334   3
   1 -17   9-30.0569 38.4415   2
  -1  17  -9 99.2785 46.6476   5
   1 -17   9 84.9392 32.2600   3
   1 -16  -4 718.703 79.5320   1
  -1  16   4 680.048 78.8894   6
  -1  16   3 347.617 59.1917   6
   1 -16  -3 358.621 61.3982   1
   1 -16  -2 365.470 55.1676   1
  -1  16   2 486.723 66.9751   6
  -1  16   1 471.220 64.4775   6
   1 -16  -1 378.679 54.8228   1
  -1  16   0 313.067 55.9237   6
   1 -16   0 229.266 46.1690   1
  -1  16  -1 750.588 74.9610   6
   1 -16   1 799.802 76.8510   1
  -1  16  -2 298.738 52.3346   6
   1 -16   2 356.980 52.4931   1
   1 -16   3 102.694 34.7464   1
  -1  16  -3 131.198 42.5349   6
  -1  16  -4 534.286 62.7076   6
   1 -16   4 417.543 46.8825   3
   1 -16   4 547.377 56.8314   2
   1 -16   4 576.688 60.4679   1
   1 -16   5 1146.14 83.5359   1
   1 -16   5 1134.76 85.7363   3
   1 -16   5 1048.36 75.6184   2
  -1  16  -5 1219.00 87.4346   6
   1 -16   6 1075.49 77.9818   1
   1 -16   6 991.838 82.3849   3
   1 -16   6 948.856 74.2500   2
   1 -16   7 29.3738 29.6808   1
   1 -16   7-34.6311 24.0270   2
   1 -16   7-8.05171 26.5460   3
   1 -16   8 81.4931 33.9493   3
  -1  16  -8 57.5698 37.1122   5
  -1  16  -9 167.942 44.9893   5
   1 -16   9 185.487 43.0083   2
   1 -16   9 131.788 36.7505   3
  -1  16 -10-38.9341 29.6901   5
   1 -16  10-17.1131 37.1902   2
   1 -16  11 36.2514 35.8788   2
   1 -15  -6-47.5184 43.3566   1
  -1  15   6 24.1824 32.9714   6
  -1  15   5 217.214 48.7151   6
   1 -15  -5 145.108 44.2610   1
   1 -15  -4 451.685 63.7322   1
  -1  15   4 490.306 66.1108   6
  -1  15   3 321.810 53.6394   6
   1 -15  -3 348.041 57.3740   1
   1 -15  -2 785.513 73.6623   1
  -1  15   2 827.995 81.4343   6
  -1  15   1 58.9294 37.7875   6
   1 -15  -1 11.2126 32.3120   1
  -1  15   0 190.656 44.5433   6
   1 -15   0 261.205 51.0952   1
   1 -15   1 116.277 36.5782   1
  -1  15  -1 36.0167 29.1182   6
   1 -15   2 173.087 35.2442   2
   1 -15   2 83.1679 30.8186   1
  -1  15  -2 121.779 36.7337   6
   1 -15   3 6.26839 21.0779   1
   1 -15   3 55.4828 29.5433   2
  -1  15  -3 22.2204 31.0606   6
   1 -15   4 9.00739 21.3977   2
   1 -15   4 69.2249 28.1729   1
  -1  15  -4 46.4464 31.1760   6
   1 -15   5 269.623 40.0933   2
  -1  15  -5 313.700 48.4154   6
   1 -15   5 307.325 45.7552   3
   1 -15   5 374.111 47.2226   1
  -1  15  -6 1322.40 89.4232   5
   1 -15   6 1260.67 85.5588   3
   1 -15   6 1257.28 80.7015   1
   1 -15   6 1227.08 81.1085   2
  -1  15  -7 82.4906 35.0426   5
   1 -15   7 1.30740 25.3837   2
   1 -15   7 44.2772 29.4945   1
   1 -15   7 88.7835 36.3320   3
  -1  15  -8 205.695 42.3795   5
   1 -15   8 360.349 49.8903   1
   1 -15   8 208.145 40.2907   3
   1 -15   9 31.6964 26.2989   3
  -1  15  -9 57.6544 35.2401   5
   1 -15  10-105.940 50.2740   3
  -1  15 -10 34.4123 31.5235   5
   1 -15  11-38.6133 35.8353   2
  -1  15 -11 9.29405 34.1379   5
   1 -15  11-64.4649 43.7006   3
   1 -15  12-38.9180 42.2967   2
   1 -14  -8 1247.26 103.439   1
  -1  14   8 1347.05 107.598   6
  -1  14   7 173.976 46.2480   6
   1 -14  -7 243.955 55.6500   1
  -1  14   6 1025.40 90.1248   6
   1 -14  -6 969.065 87.9914   1
   1 -14  -5 1327.67 97.6853   1
  -1  14   5 1297.80 96.5727   6
   1 -14  -4 1453.29 100.196   1
  -1  14   4 1559.93 104.631   6
  -1  14   3 951.270 82.2121   6
   1 -14  -3 846.523 76.1475   1
  -1  14   2 355.162 55.7857   6
   1 -14  -2 265.950 45.8196   1
  -1  14   1 327.704 52.6273   6
   1 -14  -1 460.639 59.0072   1
  -1  14   0 383.964 54.2861   6
   1 -14   0 386.678 52.9058   1
  -1  14  -1 2332.49 113.491   6
   1 -14   1 2243.54 89.4662   2
   1 -14   1 2335.72 111.244   1
   1 -14   2 2307.83 94.6155   2
  -1  14  -2 2250.85 111.143   6
   1 -14   2 2374.12 109.078   1
   1 -14   3 2009.02 91.7731   2
   1 -14   3 2043.40 100.131   1
  -1  14  -3 2028.20 104.930   6
   1 -14   4 2773.18 116.748   1
   1 -14   4 2535.44 105.848   2
  -1  14  -4 2723.90 118.121   6
   1 -14   5 886.723 73.9056   3
  -1  14  -5 855.806 71.4226   5
  -1  14  -5 913.495 71.9566   6
   1 -14   5 916.421 70.2551   1
   1 -14   6 2158.92 105.788   3
   1 -14   6 2284.88 101.885   1
  -1  14  -6 2323.20 110.657   5
   1 -14   7 1508.83 85.3681   1
   1 -14   7 1420.26 87.5445   3
  -1  14  -7 1445.10 88.8331   5
   1 -14   8 2336.53 110.749   3
  -1  14  -8 2267.24 111.003   5
   1 -14   9 3182.30 132.553   3
  -1  14  -9 3289.69 133.873   5
   1 -14  10 434.455 49.6192   3
  -1  14 -10 662.843 64.6627   5
   1 -14  11 690.162 61.7887   3
  -1  14 -11 862.183 73.2149   5
  -1  14 -12 915.098 76.7037   5
   1 -14  12 748.993 66.7533   3
   1 -13  -9 269.923 59.2062   1
  -1  13   9 220.444 51.8761   6
   1 -13  -8 78.5222 43.4069   1
  -1  13   8 76.6332 38.4690   6
   1 -13  -7 106.092 44.7858   1
  -1  13   7 164.095 43.7956   6
   1 -13  -6 69.8550 39.0633   1
  -1  13   6 72.1424 39.0903   6
  -1  13   5 274.110 50.9015   6
   1 -13  -5 190.427 42.7624   1
  -1  13   4 95.0280 35.6938   6
   1 -13  -4 56.6778 31.3640   1
  -1  13   3 310.516 49.5212   6
   1 -13  -3 206.413 41.6463   1
   1 -13  -2 8.87368 29.2247   1
  -1  13   2 43.2515 28.6769   6
   1 -13  -1 159.359 24.0768   2
   1 -13  -1 188.070 39.1028   1
  -1  13   1 155.690 37.1962   6
   1 -13   0 47.0513 34.0557   1
  -1  13   0 12.3974 25.7502   6
   1 -13   0 19.9669 17.8199   2
   1 -13   1 618.632 47.7136   2
  -1  13  -1 549.006 56.0636   6
   1 -13   1 556.929 55.1169   1
   1 -13   2 235.922 38.1150   1
  -1  13  -2 250.366 42.4542   6
   1 -13   2 269.806 38.0886   2
   1 -13   3 229.543 40.1086   1
   1 -13   3 212.353 31.3812   2
  -1  13  -3 208.463 38.4229   6
   1 -13   4 1540.28 82.3749   1
  -1  13  -4 1476.91 84.4260   6
  -1  13  -4 1507.82 87.2951   5
  -1  13  -5 450.733 51.2896   6
   1 -13   5 455.908 50.3372   1
  -1  13  -5 445.488 51.9137   5
   1 -13   5 488.270 51.2861   3
   1 -13   6 656.307 53.9699   1
  -1  13  -6 603.776 56.9499   5
   1 -13   6 628.735 57.4077   3
  -1  13  -7 17.7586 26.6360   5
   1 -13   7 0.22810 20.1294   3
   1 -13   8 9.14905 21.8701   3
  -1  13  -8 7.91522 27.4836   5
  -1  13  -9 3.38294 26.1803   5
   1 -13   9-14.0942 26.1831   3
   1 -13  10-20.2685 32.2311   3
  -1  13 -10-8.59447 25.5176   5
   1 -13  11-67.7529 36.8551   3
  -1  13 -11-25.2846 27.0724   5
   1 -13  12 1215.70 81.7149   3
  -1  13 -12 1133.25 81.6089   5
   1 -13  13 656.736 65.3573   3
  -1  13 -13 492.166 57.5269   5
   1 -12 -11 102.366 45.1145   1
  -1  12  11 193.894 52.1808   6
   1 -12 -10 497.089 74.4215   1
  -1  12  10 417.158 64.4499   6
  -1  12   9 319.195 55.2066   6
   1 -12  -9 254.813 56.3082   1
  -1  12   8 25.7626 32.4469   6
   1 -12  -8 6.11115 33.2115   1
  -1  12   7 694.888 72.1304   6
   1 -12  -7 797.268 76.2734   1
   1 -12  -6 22.0373 33.8242   1
  -1  12   6 34.9520 31.3479   6
   1 -12  -5 82.1248 35.5516   1
  -1  12   5 78.7297 34.6764   6
  -1  12   4 50.0954 30.4229   6
   1 -12  -4 44.5468 30.7053   1
  -1  12   3 263.927 45.7621   6
   1 -12  -3 287.046 44.3265   1
  -1  12   2 927.611 71.8224   6
   1 -12  -2 1033.62 46.8964   2
   1 -12  -2 900.342 70.6864   1
  -1  12   1 377.547 51.0773   6
   1 -12  -1 299.814 31.0592   2
   1 -12  -1 359.153 47.7857   1
   1 -12   0 280.506 34.7174   2
  -1  12   0 237.609 46.5337   6
   1 -12   0 290.399 45.8558   1
  -1  12  -1 2436.28 105.883   6
   1 -12   1 2285.96 84.3136   2
   1 -12   1 2442.23 101.579   1
   1 -12   2 569.166 47.3539   2
  -1  12  -2 567.628 56.9769   6
   1 -12   2 590.521 53.4299   1
  -1  12  -3 235.514 38.1499   5
  -1  12  -3 193.342 38.8683   6
   1 -12   3 231.046 38.8765   1
  -1  12  -4 4263.15 132.208   4
   1 -12   4 4524.92 132.112   1
  -1  12  -4 4384.19 136.787   5
  -1  12  -4 4486.77 136.664   6
  -1  12  -5 2845.78 111.529   5
  -1  12  -5 2617.96 107.624   4
  -1  12  -5 2759.67 106.480   6
   1 -12   5 2695.61 112.173   3
  -1  12  -6 70.6339 33.5363   4
   1 -12   6 59.4454 27.3398   3
  -1  12  -6 89.8321 31.3604   5
   1 -12   7 41.2875 23.8097   3
  -1  12  -7 49.7300 26.3176   5
  -1  12  -7 37.5034 31.1946   4
  -1  12  -8 348.785 45.0640   5
  -1  12  -8 321.419 48.3192   4
   1 -12   8 295.944 39.8344   3
  -1  12  -9 1241.90 84.1021   4
  -1  12  -9 1220.02 77.8543   5
   1 -12   9 1039.47 69.9531   3
  -1  12 -10 1141.44 75.0209   5
   1 -12  10 989.650 67.6936   3
  -1  12 -10 980.402 81.8955   4
  -1  12 -11 66.2584 31.8766   5
  -1  12 -11 71.9175 37.1592   4
   1 -12  11 31.0897 23.1294   3
   1 -12  12 12.3315 26.2802   3
  -1  12 -12 50.5073 27.0520   5
  -1  12 -13 451.621 54.5989   5
   1 -12  13 630.770 63.9045   3
   1 -12  14 563.428 57.6815   3
  -1  11  12 189.280 49.0712   6
   1 -11 -12 181.997 58.4719   1
   1 -11 -11 65.6363 43.7229   1
  -1  11  11 87.9679 41.2735   6
   1 -11 -10 29.9609 37.1553   1
  -1  11  10 33.3536 33.7081   6
   1 -11  -9 205.081 49.7279   1
  -1  11   9 177.754 50.5283   6
  -1  11   8-22.7700 34.4389   6
   1 -11  -8-4.35437 32.9167   1
   1 -11  -7 41.7528 34.7245   1
  -1  11   7 36.9063 35.2256   6
  -1  11   6 27.6794 29.4812   6
   1 -11  -6 50.2905 33.4463   1
   1 -11  -5 31.7407 29.8080   1
  -1  11   5 45.7281 30.8021   6
  -1  11   4-25.2102 26.2637   6
   1 -11  -4-8.67555 33.6845   1
  -1  11   3 168.764 38.2404   6
   1 -11  -3 165.137 36.4195   1
   1 -11  -3 183.988 20.1859   2
   1 -11  -2 593.683 54.3760   1
   1 -11  -2 555.780 34.0542   2
  -1  11   2 587.468 55.8335   6
  -1  11   1 383.824 46.8769   6
   1 -11  -1 350.488 30.4618   2
   1 -11  -1 403.540 48.0171   1
  -1  11   0 68.8312 27.3685   6
   1 -11   0 85.4757 25.3065   1
   1 -11   0 117.303 23.4189   2
  -1  11  -1 40.5063 25.4151   6
   1 -11   1 55.3260 24.0120   1
   1 -11   1 95.3579 24.9750   2
   1 -11   2 90.2752 22.1151   1
  -1  11  -2 82.2097 23.7590   4
  -1  11  -2 97.4257 31.3818   6
  -1  11  -3 1138.34 67.2139   6
  -1  11  -3 1114.08 63.9549   4
  -1  11  -3 1096.03 67.5794   5
   1 -11   3 1066.79 62.7468   1
  -1  11  -4-3.63380 21.1740   6
  -1  11  -4 9.33913 24.1574   4
  -1  11  -4 25.5370 25.7716   5
  -1  11  -5 857.104 59.2864   5
  -1  11  -5 892.690 61.7773   4
  -1  11  -5 884.384 60.0345   6
   1 -11   5 880.423 58.5703   3
  -1  11  -6 72.4489 26.0689   5
   1 -11   6 59.9496 21.2558   3
  -1  11  -6 101.515 32.7261   4
  -1  11  -7 19.5955 25.3986   4
   1 -11   7 13.2922 18.6418   3
  -1  11  -7-11.9561 23.1614   5
   1 -11   8 12.0729 16.8780   3
  -1  11  -8 27.3116 20.6531   5
  -1  11  -8-0.24122 27.0801   4
   1 -11   9 52.6704 19.5452   3
  -1  11  -9 89.8853 28.5915   5
  -1  11  -9 157.463 39.2619   4
  -1  11 -10 219.505 42.9514   4
  -1  11 -10 302.942 41.1076   5
   1 -11  10 216.724 32.4551   3
  -1  11 -11 816.728 74.6902   4
  -1  11 -11 946.991 66.0639   5
   1 -11  11 893.529 62.9685   3
  -1  11 -12 228.950 40.3999   5
   1 -11  12 273.986 43.8074   3
  -1  11 -12 112.223 41.0863   4
  -1  11 -13 157.124 36.3735   5
  -1  11 -13 100.386 40.5846   4
  -1  11 -14 12.2459 26.5532   5
   1 -11  14 3.93854 27.6578   3
   1 -11  15 317.528 49.4358   3
   1 -11  16 245.294 58.9532   2
  -1  10  13 31.5390 37.1092   6
   1 -10 -13 83.4418 46.9216   1
  -1  10  12 7.90675 34.0666   6
   1 -10 -12-59.9381 51.0164   1
  -1  10  11 124.065 37.5960   6
   1 -10 -11 105.503 42.4807   1
   1 -10 -10 794.599 77.0646   1
  -1  10  10 745.271 74.2685   6
  -1  10   9 133.658 38.3923   6
   1 -10  -9 116.892 39.0345   1
  -1  10   8 1105.95 83.8580   6
   1 -10  -8 1228.86 87.1889   1
  -1  10   7 19.0401 28.6154   6
   1 -10  -7 37.5202 38.0437   1
  -1  10   6 183.304 37.5666   6
   1 -10  -6 240.047 45.3132   1
  -1  10   5 1606.24 89.7766   6
   1 -10  -5 1598.40 88.4160   1
   1 -10  -4 35.0019 25.5614   1
  -1  10   4 53.0355 28.2292   6
   1 -10  -4 39.6048 8.56004   2
   1 -10  -3 1469.16 44.3349   2
  -1  10   3 1511.28 84.4959   6
   1 -10  -3 1410.16 43.2222   4
   1 -10  -3 1578.52 82.3073   1
   1 -10  -2 198.936 21.2459   2
   1 -10  -2 191.964 21.5221   4
   1 -10  -2 194.263 35.4197   1
  -1  10   2 212.338 37.4312   6
  -1  10   1 317.722 41.4777   6
   1 -10  -1 245.330 38.7485   1
   1 -10  -1 277.945 27.0818   2
  -1  10   0 333.302 32.0721   4
   1 -10   0 340.250 31.8447   2
   1 -10   0 307.725 37.7666   1
  -1  10   0 283.962 38.7283   6
   1 -10   1 426.809 40.5083   1
  -1  10  -1 393.464 41.2240   6
  -1  10  -1 427.641 36.1598   4
   1 -10   2 508.986 43.3606   1
  -1  10  -2 458.825 40.5383   4
  -1  10  -2 443.716 43.9024   6
  -1  10  -2 484.489 46.4904   5
  -1  10  -3 121.466 28.2319   4
  -1  10  -3 84.4153 26.7570   5
  -1  10  -3 93.3129 27.0716   6
  -1  10  -4 1513.15 73.1050   6
  -1  10  -4 1415.51 72.5336   4
  -1  10  -4 1547.73 73.8080   5
   1 -10   5-20.4968 18.6612   3
  -1  10  -5 1.83870 22.4162   4
  -1  10  -5 8.95640 21.8852   5
  -1  10  -6 142.034 29.1287   5
   1 -10   6 110.677 24.5528   3
  -1  10  -6 141.543 33.1505   4
  -1  10  -7 33.1834 26.1437   4
   1 -10   7 16.5629 14.1640   3
  -1  10  -7 17.9033 22.0935   5
  -1  10  -8 99.6788 30.9526   4
   1 -10   8 92.7034 27.0688   3
  -1  10  -8 124.773 27.4169   5
  -1  10  -9 11.3436 25.8355   4
   1 -10   9-6.71309 20.8009   3
  -1  10  -9-7.72829 20.8332   5
  -1  10 -10 455.587 54.3917   4
   1 -10  10 403.715 41.5203   3
  -1  10 -10 461.371 46.3308   5
   1 -10  11 103.689 28.7402   3
  -1  10 -11 65.2579 27.7545   5
  -1  10 -11 81.6024 37.1959   4
  -1  10 -12 136.291 38.1153   4
  -1  10 -12 152.312 31.7558   5
   1 -10  13 581.147 52.1866   3
  -1  10 -13 680.812 59.5964   5
  -1  10 -13 672.404 69.5233   4
  -1  10 -14 271.992 51.1728   4
  -1  10 -14 344.393 47.2697   5
   1 -10  14 237.845 41.0466   3
   1 -10  15 36.7510 29.9457   3
  -1  10 -15 15.8659 26.6227   5
   1 -10  16 192.729 49.3685   2
  -1   9  14 47.1228 36.1159   6
   1  -9 -14 7.68044 53.9457   1
   1  -9 -13 28.3500 47.5826   1
  -1   9  13 138.636 43.1452   6
   1  -9 -12 7.18701 36.9800   1
  -1   9  12 19.8554 30.1081   6
   1  -9 -11-2.84827 33.5189   1
  -1   9  11 10.6552 33.2198   6
   1  -9 -10 298.430 53.5955   1
  -1   9  10 303.092 49.5254   6
   1  -9  -9 42.2006 33.6651   1
  -1   9   9 73.6211 35.5540   6
   1  -9  -8 1021.52 80.4973   1
  -1   9   8 1054.15 78.2641   6
   1  -9  -7 3008.89 123.759   1
  -1   9   7 3224.34 125.495   6
   1  -9  -6 2402.99 105.526   1
  -1   9   6 2470.25 108.703   6
   1  -9  -5 1777.07 89.7024   1
  -1   9   5 1907.28 93.4557   6
   1  -9  -4 673.711 22.4497   2
  -1   9   4 914.995 63.9405   6
   1  -9  -4 706.490 23.2756   4
   1  -9  -4 872.710 61.8746   1
  -1   9   3 80.5993 27.3412   6
   1  -9  -3 82.3334 14.1604   2
   1  -9  -3 66.5313 26.9639   1
   1  -9  -3 65.1837 12.0035   4
   1  -9  -2 80.1135 15.2895   2
   1  -9  -2 81.5016 25.7604   1
   1  -9  -2 96.7710 16.0296   4
  -1   9   2 82.4819 26.4049   6
   1  -9  -1 147.194 21.7613   2
   1  -9  -1 139.016 29.2029   1
   1  -9  -1 149.751 21.3007   4
  -1   9   1 134.432 28.8245   6
  -1   9   1 113.136 19.0973   4
  -1   9   0 1412.71 74.5506   6
   1  -9   0 1488.18 57.0519   2
   1  -9   0 1369.44 69.0874   1
  -1   9   0 1434.62 57.2183   4
   1  -9   1 143.540 25.6338   1
  -1   9  -1 174.811 31.4155   6
  -1   9  -1 159.399 26.1487   4
  -1   9  -2 823.614 53.8837   5
  -1   9  -2 900.433 50.4719   4
   1  -9   2 935.475 53.3597   1
  -1   9  -2 902.933 56.0968   6
  -1   9  -3 10569.8 176.396   5
  -1   9  -3 11069.0 181.913   6
  -1   9  -3 10597.7 176.603   4
  -1   9  -4 934.434 57.1043   4
  -1   9  -4 955.389 56.2920   6
  -1   9  -4 940.118 56.0953   5
  -1   9  -5 448.465 43.3992   4
  -1   9  -5 426.071 39.2011   5
   1  -9   5 421.063 37.9231   3
  -1   9  -6 616.154 53.1839   4
   1  -9   6 575.839 43.0722   3
  -1   9  -6 565.118 44.8320   5
  -1   9  -7 166.238 33.9779   4
  -1   9  -7 169.680 28.9543   5
   1  -9   7 193.654 27.0489   3
  -1   9  -8 368.315 48.2231   4
  -1   9  -8 327.435 36.5512   5
   1  -9   8 265.737 33.7899   3
  -1   9  -9 170.461 30.5924   5
   1  -9   9 130.828 25.4885   3
  -1   9  -9 137.896 36.7752   4
   1  -9  10 279.391 37.1068   3
  -1   9 -10 288.238 47.0045   4
  -1   9 -10 329.888 38.6046   5
  -1   9 -11 6997.77 162.543   5
   1  -9  11 7178.73 161.533   3
  -1   9 -11 6796.38 188.037   4
  -1   9 -12 668.087 55.4190   5
  -1   9 -12 635.144 65.0204   4
   1  -9  12 567.291 48.1251   3
   1  -9  13-28.4403 30.2835   3
  -1   9 -13 2.18030 24.1740   5
  -1   9 -13 12.5200 32.9133   4
  -1   9 -14 114.284 38.8812   4
  -1   9 -14 87.9604 32.2033   5
   1  -9  14 41.5768 26.2322   3
   1  -9  15-11.2399 26.9805   3
  -1   9 -15 58.1800 30.9716   5
   1  -9  16 116.679 46.3357   2
   1  -9  16 52.0815 30.0060   3
   1  -9  17 196.708 57.4488   2
   1  -8 -15 420.989 79.4122   1
  -1   8  15 351.235 58.9721   6
   1  -8 -14 98.8739 45.1664   1
  -1   8  14 276.244 49.3898   6
  -1   8  13 794.921 75.7856   6
   1  -8 -13 682.858 74.8933   1
   1  -8 -12-12.6722 40.2600   1
  -1   8  12 56.7004 35.1430   6
   1  -8 -11 967.418 77.5793   1
  -1   8  11 1112.36 82.5974   6
  -1   8  10 5168.27 170.150   6
   1  -8 -10 5175.56 167.616   1
  -1   8   9 890.509 70.1424   6
   1  -8  -9 819.449 71.6634   1
   1  -8  -8 1002.71 72.5374   1
  -1   8   8 1099.35 75.4089   6
  -1   8   7 1202.53 76.4728   6
   1  -8  -7 1204.51 76.6747   1
  -1   8   6 208.803 36.3465   6
   1  -8  -6 171.913 35.0257   1
   1  -8  -5 24.1744 22.9518   1
  -1   8   5-14.8667 21.5022   6
   1  -8  -4 64.9350 24.5816   1
   1  -8  -4 50.3740 6.10898   4
  -1   8   4 108.276 28.9398   6
   1  -8  -4 63.1827 7.36568   2
   1  -8  -3-4.18952 8.16799   4
   1  -8  -3 7.58530 22.7331   1
   1  -8  -3 22.5194 11.6977   2
  -1   8   3-1.28890 21.8564   6
  -1   8   2 1530.50 45.1868   4
  -1   8   2 1562.34 72.9965   6
   1  -8  -2 1499.09 44.1794   2
   1  -8  -2 1517.99 72.1505   1
   1  -8  -2 1526.47 44.2199   4
   1  -8  -1 2991.25 67.4291   4
  -1   8   1 2788.57 67.9691   4
  -1   8   1 2903.76 95.1290   6
   1  -8  -1 2951.32 67.6768   2
   1  -8  -1 2909.43 92.6649   1
  -1   8   0 5386.00 101.163   4
   1  -8   0 5302.56 97.1367   2
  -1   8   0 5251.95 125.603   6
   1  -8   0 5327.97 96.8814   4
   1  -8   0 5281.49 120.486   1
  -1   8  -1 4521.06 113.524   6
  -1   8  -1 4551.05 100.060   4
   1  -8   1 4424.85 108.824   1
  -1   8  -2 4467.65 105.112   4
  -1   8  -2 4236.69 108.059   6
  -1   8  -2 4411.24 108.010   5
  -1   8  -3 5956.89 126.917   4
  -1   8  -3 6193.35 126.858   5
  -1   8  -3 6124.48 129.430   6
  -1   8  -4 29.1759 19.1310   5
  -1   8  -4 0.85112 17.3488   6
   1  -8   4 14.2903 15.8477   3
  -1   8  -4 25.7963 22.2620   4
  -1   8  -5 1380.52 62.1766   5
  -1   8  -5 1338.23 67.0496   4
   1  -8   5 1375.68 60.1440   3
  -1   8  -6 972.358 53.2845   5
  -1   8  -6 947.928 60.6215   4
   1  -8   6 914.345 50.6479   3
  -1   8  -7 197.511 29.1236   5
   1  -8   7 200.333 25.7810   3
  -1   8  -7 202.446 36.9233   4
  -1   8  -8 237.604 30.1228   5
  -1   8  -8 253.988 38.9209   4
   1  -8   8 230.678 27.8703   3
  -1   8  -9 755.206 50.6233   5
   1  -8   9 707.652 49.0083   3
  -1   8  -9 672.712 60.5682   4
   1  -8  10 211.609 33.4325   3
  -1   8 -10 148.270 29.3820   5
  -1   8 -10 152.091 35.2514   4
   1  -8  11 97.9495 26.3938   3
  -1   8 -11 139.890 36.7343   4
  -1   8 -11 164.060 30.8348   5
   1  -8  12 92.6520 25.1714   3
  -1   8 -12 104.232 27.6993   5
  -1   8 -12 157.876 40.0559   4
   1  -8  13 3.14977 23.4401   3
  -1   8 -13-5.17500 22.3404   5
  -1   8 -13 4.86886 29.8208   4
  -1   8 -14 224.981 44.9377   4
  -1   8 -14 201.204 35.1704   5
   1  -8  14 263.503 42.1413   3
   1  -8  15 15.5563 27.6402   3
  -1   8 -15 57.5233 38.2374   4
  -1   8 -15 16.3581 25.7660   5
  -1   8 -16 18.0647 27.5987   5
   1  -8  16 36.9844 36.4904   2
   1  -8  16 41.2385 33.5133   3
   1  -8  17 124.745 55.5916   2
   1  -8  18 216.655 69.8502   2
  -1   7  16 210.115 52.4452   6
   1  -7 -16 219.643 77.3892   1
   1  -7 -15 18.6056 48.0761   1
  -1   7  15 121.775 44.7621   6
  -1   7  14 21.1351 33.7473   6
   1  -7 -14-49.8094 44.0611   1
  -1   7  13 106.632 40.1552   6
   1  -7 -13 104.258 38.2272   1
   1  -7 -12 14.3167 46.5905   1
  -1   7  12 125.404 40.1665   6
   1  -7 -11 1622.41 95.2748   1
  -1   7  11 1700.84 99.8992   6
  -1   7  10 3137.85 125.112   6
   1  -7 -10 2946.48 123.740   1
   1  -7  -9 894.269 69.5941   1
  -1   7   9 893.671 68.8100   6
   1  -7  -8 821.168 67.1845   1
  -1   7   8 862.635 67.7504   6
  -1   7   7 161.850 36.8549   6
   1  -7  -7 157.506 33.3069   1
  -1   7   6 175.817 34.7748   6
   1  -7  -6 180.425 34.3215   1
   1  -7  -5 866.360 59.0251   1
  -1   7   5 769.098 59.1302   6
   1  -7  -4 882.816 57.7714   1
  -1   7   4 919.824 61.9150   6
   1  -7  -3 4377.95 59.7059   4
   1  -7  -3 4934.37 120.807   1
   1  -7  -3 4554.08 60.5533   2
  -1   7   3 5003.40 124.863   6
  -1   7   2 4327.03 69.4542   4
  -1   7   2 4140.98 109.123   6
   1  -7  -2 4197.10 67.0951   4
   1  -7  -2 4203.33 66.8502   2
   1  -7  -2 4214.55 108.288   1
   1  -7  -1 9171.74 109.564   4
   1  -7  -1 9028.91 109.230   2
  -1   7   1 9064.52 154.579   6
  -1   7   1 9164.91 112.477   4
   1  -7  -1 8832.51 150.273   1
  -1   7   0 5413.45 94.9801   4
  -1   7   0 4941.12 115.499   6
   1  -7   0 5194.20 111.084   1
   1  -7   0 5215.63 91.4073   2
   1  -7   0 5216.67 92.2751   4
  -1   7  -1 1648.53 64.2472   5
   1  -7   1 1843.65 59.5590   4
  -1   7  -1 1796.51 61.1867   4
  -1   7  -1 1598.13 65.4119   6
  -1   7  -2 20433.3 218.386   6
  -1   7  -2 20328.5 210.117   5
  -1   7  -2 19565.4 205.495   4
  -1   7  -3 1276.60 59.8060   6
  -1   7  -3 1543.65 66.6439   4
  -1   7  -3 1329.64 58.5900   5
   1  -7   4 1343.53 55.3884   3
  -1   7  -4 1480.50 65.5416   4
  -1   7  -4 1328.62 58.3940   5
  -1   7  -5 6894.19 124.712   5
  -1   7  -5 6651.24 141.024   4
   1  -7   5 6802.11 120.968   3
  -1   7  -6 4874.70 107.409   5
  -1   7  -6 4772.41 124.324   4
   1  -7   6 4851.70 104.964   3
  -1   7  -7 8089.54 142.449   5
   1  -7   7 8020.23 137.364   3
  -1   7  -7 7819.26 165.835   4
   1  -7   8 1419.38 60.8321   3
  -1   7  -8 1426.15 63.2236   5
  -1   7  -8 1413.57 76.2183   4
   1  -7   9 2060.33 76.1786   3
  -1   7  -9 2011.74 92.5426   4
  -1   7  -9 1923.47 74.2726   5
   1  -7  10 3723.15 105.485   3
  -1   7 -10 3503.33 103.475   5
  -1   7 -10 3733.21 130.887   4
  -1   7 -11 526.778 45.2096   5
   1  -7  11 461.129 42.9976   3
  -1   7 -11 530.866 56.2716   4
   1  -7  12 870.995 59.7682   3
  -1   7 -12 866.964 71.3708   4
  -1   7 -12 810.219 58.6330   5
   1  -7  13 1120.77 69.6442   3
  -1   7 -13 1185.97 84.5403   4
  -1   7 -13 1249.30 70.7913   5
  -1   7 -14 2104.20 110.965   4
   1  -7  14 2042.03 95.1199   3
  -1   7 -14 2129.56 95.1325   5
  -1   7 -15 1239.40 89.3421   4
   1  -7  15 1307.80 79.3453   3
  -1   7 -15 1218.46 76.5143   5
   1  -7  16 212.354 43.9108   3
   1  -7  16 210.984 47.5293   2
  -1   7 -16 238.489 41.9161   5
   1  -7  17 1085.38 87.5047   2
  -1   7 -17 1191.24 81.5724   5
   1  -7  17 1143.77 82.6556   3
   1  -7  18 1299.14 102.851   2
   1  -7  19 546.557 79.3055   2
   1  -6 -17 839.223 107.700   1
  -1   6  17 762.776 84.6858   6
   1  -6 -16 147.120 57.0061   1
  -1   6  16 195.576 45.4436   6
  -1   6  15 59.7086 37.3191   6
   1  -6 -15 7.73885 42.8555   1
   1  -6 -14-37.0710 42.1471   1
  -1   6  14 20.9593 30.6857   6
  -1   6  13 16.2328 30.1326   6
   1  -6 -13-82.0755 42.7376   1
   1  -6 -12 93.9363 32.6850   1
  -1   6  12 170.963 43.4103   6
   1  -6 -11 48.0516 32.5387   1
  -1   6  11 144.781 37.1171   6
  -1   6  10 2076.99 98.9234   6
   1  -6 -10 2185.29 101.831   1
   1  -6  -9 1641.31 91.1457   1
  -1   6   9 1795.84 89.5798   6
  -1   6   8 1418.98 78.2985   6
   1  -6  -8 1456.03 78.9638   1
   1  -6  -7 20.0427 23.1048   1
  -1   6   7-2.34811 21.0721   6
  -1   6   6 94.4063 28.5410   6
   1  -6  -6 118.989 30.3766   1
   1  -6  -5 3230.62 99.5401   1
  -1   6   5 3302.56 101.030   6
  -1   6   4 1697.18 71.6095   6
   1  -6  -4 1593.99 69.4764   1
  -1   6   3 4673.39 112.920   6
  -1   6   3 4168.10 53.0320   4
   1  -6  -3 4582.74 110.143   1
   1  -6  -3 4241.23 52.2719   2
   1  -6  -3 4343.32 52.7002   4
   1  -6  -2 552.441 41.5361   1
  -1   6   2 520.197 39.9171   6
   1  -6  -2 565.132 23.9593   4
  -1   6   2 552.766 24.7398   4
   1  -6  -2 564.630 23.6337   2
  -1   6   1 892.865 34.6284   4
   1  -6  -1 968.753 35.0016   2
   1  -6  -1 869.829 46.4274   1
  -1   6   1 953.129 50.2917   6
   1  -6  -1 1019.96 36.3024   4
   1  -6   0 2973.02 79.5231   1
   1  -6   0 2936.04 65.9374   4
   1  -6   0 3088.94 67.2480   2
  -1   6   0 3026.24 70.7664   4
  -1   6   0 3041.44 83.1913   6
   1  -6   1 584.275 32.4038   4
   1  -6   1 562.760 35.3243   5
  -1   6  -1 491.038 36.3001   6
  -1   6  -1 488.757 35.6738   5
  -1   6  -1 503.215 33.1992   4
   1  -6   2 11551.5 145.546   4
   1  -6   2 11432.0 148.410   6
  -1   6  -2 11309.4 150.345   6
   1  -6   2 11533.5 145.465   5
  -1   6  -2 11074.5 141.978   5
  -1   6  -2 10670.7 143.050   4
  -1   6  -3 904.630 45.5564   6
   1  -6   3 929.618 44.7292   6
  -1   6  -3 906.658 46.9905   4
   1  -6   3 918.711 42.0983   5
  -1   6  -3 915.014 42.7830   5
   1  -6   4 696.176 37.9032   3
  -1   6  -4 696.561 43.8181   4
  -1   6  -4 663.105 37.6609   5
   1  -6   4 688.019 36.3263   5
   1  -6   4 735.149 39.6892   6
   1  -6   5 1313.61 50.6476   5
  -1   6  -5 1245.24 61.7137   4
  -1   6  -5 1322.28 53.9949   5
   1  -6   5 1203.22 49.2153   3
  -1   6  -6 74.1083 22.0090   5
   1  -6   6 53.5007 14.6786   3
  -1   6  -6 114.024 29.5655   4
  -1   6  -7 91.5563 31.1565   4
  -1   6  -7 32.7704 22.5550   5
   1  -6   7 32.5481 15.9911   3
  -1   6  -8 269.773 28.9492   5
   1  -6   8 194.718 24.3056   3
  -1   6  -8 216.419 35.3367   4
  -1   6  -9 440.308 35.8629   5
  -1   6  -9 441.368 46.1440   4
   1  -6   9 358.884 31.3787   3
  -1   6 -10 1075.15 56.9749   5
   1  -6  10 1028.04 55.6825   3
  -1   6 -10 1151.85 71.9847   4
   1  -6  11 28.8345 22.5468   3
  -1   6 -11 33.3111 21.1622   5
  -1   6 -11 46.2852 29.0570   4
  -1   6 -12 30.9018 30.8264   4
   1  -6  12 32.7860 23.7656   3
  -1   6 -12 66.1864 27.9057   5
  -1   6 -13 35.5882 30.7864   4
   1  -6  13 39.2367 23.8160   3
  -1   6 -13 45.0866 23.2193   5
  -1   6 -14 333.174 50.4272   4
   1  -6  14 408.779 48.5499   3
  -1   6 -14 317.151 41.5098   5
  -1   6 -15 199.972 42.9610   4
   1  -6  15 250.821 45.0074   3
   1  -6  15 213.111 42.3849   2
  -1   6 -15 269.577 40.1001   5
   1  -6  16 290.861 52.9122   2
   1  -6  16 273.202 44.3170   3
  -1   6 -16 293.661 43.0198   5
  -1   6 -17 112.697 36.8252   5
   1  -6  17 131.135 41.8183   2
   1  -6  17 108.223 38.5207   3
   1  -6  17 104.481 35.7744   6
   1  -6  18 664.748 78.2564   2
   1  -6  19 227.828 68.3456   2
   1  -5 -18 1416.93 139.407   1
  -1   5  18 69.1559 39.0811   6
   1  -5 -17 180.564 64.0583   1
  -1   5  17-9.18956 31.5264   6
   1  -5 -16 156.080 62.4178   1
  -1   5  16 15.8961 32.4346   6
  -1   5  15 153.045 41.4766   6
   1  -5 -15 137.847 44.2916   1
  -1   5  14 19.4049 32.1331   6
   1  -5 -14-0.48111 37.2534   1
  -1   5  13 316.340 48.7666   6
   1  -5 -13 249.469 49.5531   1
  -1   5  12-14.0269 31.0840   6
   1  -5 -12-50.5219 37.0036   1
   1  -5 -11 93.9065 31.1218   1
  -1   5  11 224.269 39.3897   6
  -1   5  10 86.2042 8.91958   2
  -1   5  10 69.1201 26.7685   6
   1  -5 -10 111.873 33.8621   1
  -1   5   9-0.18746 22.7957   6
   1  -5  -9 21.8368 28.6721   1
   1  -5  -8 259.293 41.8069   1
  -1   5   8 292.332 38.3160   6
   1  -5  -7 51.7483 24.3453   1
  -1   5   7 54.2942 21.7656   6
  -1   5   6 8.01159 20.7063   6
   1  -5  -6 10.0568 21.1143   1
  -1   5   5 29.6080 20.1979   6
   1  -5  -5 45.5470 22.4214   1
   1  -5  -4 748.780 46.5232   1
  -1   5   4 792.938 49.4053   6
  -1   5   3 38.2725 21.0604   6
   1  -5  -3 83.3422 23.0301   1
   1  -5  -3-3.06647 8.63378   4
  -1   5   3 48.4556 7.36720   4
   1  -5  -3-13.2619 8.61571   2
  -1   5   2 491.014 37.0014   6
   1  -5  -2 519.448 22.1855   2
   1  -5  -2 468.573 34.9249   1
  -1   5   2 465.788 20.4641   4
   1  -5  -2 456.538 19.5319   4
  -1   5   1 57.5404 19.1874   6
   1  -5  -1 123.179 16.0511   4
   1  -5  -1 54.5689 17.6262   6
   1  -5  -1 78.1411 17.2534   5
   1  -5  -1 63.4335 18.8762   1
   1  -5  -1 83.2214 13.8502   2
  -1   5   1 80.5007 14.3622   4
   1  -5   0 1529.66 43.0930   2
   1  -5   0 1460.50 51.4523   6
  -1   5   0 1406.45 52.9258   6
   1  -5   0 1497.08 42.1845   4
   1  -5   0 1462.04 49.6704   5
  -1   5   0 1525.50 44.1162   4
  -1   5  -1 1377.51 47.5083   5
   1  -5   1 1411.52 45.7198   4
  -1   5  -1 1442.93 47.6004   4
   1  -5   1 1400.79 47.6212   5
   1  -5   1 1404.76 49.4884   6
  -1   5  -1 1330.59 50.6072   6
  -1   5  -2 4234.09 86.0840   6
   1  -5   2 4463.99 85.9289   6
  -1   5  -2 4156.65 84.6395   4
   1  -5   2 4255.23 83.2376   4
  -1   5  -2 4183.25 78.3380   5
   1  -5   2 4368.37 80.1974   5
   1  -5   3 4242.08 77.8998   3
  -1   5  -3 4054.45 88.7988   4
   1  -5   3 4167.99 87.7599   4
   1  -5   3 4258.96 84.4734   6
  -1   5  -3 4142.85 77.9976   5
   1  -5   3 4237.61 77.7533   5
  -1   5  -4 1705.68 63.2209   4
   1  -5   4 1723.41 55.2269   6
  -1   5  -4 1778.93 52.8644   5
   1  -5   4 1805.58 51.8767   5
   1  -5   4 1749.14 51.6008   3
  -1   5  -5 4430.85 106.365   4
   1  -5   5 4619.67 92.5534   6
  -1   5  -5 4746.65 88.1958   5
   1  -5   5 4633.32 85.1242   5
   1  -5   5 4695.33 86.1516   3
  -1   5  -6 3326.83 95.6510   4
  -1   5  -6 3418.61 77.5693   3
   1  -5   6 3385.05 76.5964   5
  -1   5  -6 3282.10 75.6564   5
   1  -5   6 3379.92 76.5355   3
   1  -5   7 4.06380 13.6539   3
  -1   5  -7-29.4582 25.3127   4
   1  -5   7 17.5405 11.8745   5
  -1   5  -7-5.66891 14.5743   5
   1  -5   8 76.2030 19.8237   3
  -1   5  -8 183.204 24.6231   5
  -1   5  -8 202.640 30.3580   4
  -1   5  -9 7230.60 158.602   4
   1  -5   9 7072.36 130.844   3
  -1   5  -9 7089.97 131.681   5
  -1   5 -10 4566.47 112.118   5
   1  -5  10 4733.91 112.988   3
  -1   5 -10 4753.72 135.330   4
  -1   5 -11 1089.65 71.2714   4
  -1   5 -11 997.707 56.5325   5
   1  -5  11 1002.69 57.6844   3
  -1   5 -12 2.87518 20.1424   5
  -1   5 -12-11.2923 26.8934   4
   1  -5  12 21.2432 21.7721   3
  -1   5 -13 752.684 63.4635   4
   1  -5  13 730.787 57.4061   3
  -1   5 -13 778.645 55.7052   5
  -1   5 -14 248.025 42.2609   4
   1  -5  14 292.056 41.2059   3
  -1   5 -14 316.831 40.4896   5
  -1   5 -15 760.134 70.3265   4
   1  -5  15 725.585 63.4453   2
  -1   5 -15 748.441 60.9281   5
   1  -5  15 769.186 62.2030   3
   1  -5  16 89.6276 35.5785   6
  -1   5 -16 40.1391 25.6304   5
   1  -5  16 64.1530 31.5983   3
   1  -5  16 65.4706 37.0997   2
   1  -5  17-8.09684 31.9646   2
  -1   5 -17 23.1680 26.9413   5
   1  -5  17-2.05407 30.7887   3
   1  -5  17-52.1622 34.1981   6
   1  -5  18 67.6073 28.5501   6
   1  -5  18 125.396 53.5443   2
  -1   5 -18 77.2768 31.9335   5
   1  -5  18 14.8714 29.6965   3
   1  -5  19 293.730 67.6423   2
  -1   4  18 791.417 80.8835   6
   1  -4 -18 1202.82 105.524   1
  -1   4  17 317.995 55.3625   6
   1  -4 -17 464.564 74.9338   1
   1  -4 -16 1604.74 105.710   1
  -1   4  16 1348.66 93.9371   6
  -1   4  15 469.000 57.2601   6
   1  -4 -15 552.438 69.7540   1
  -1   4  14 3466.54 137.056   6
   1  -4 -14 3324.69 136.664   1
   1  -4 -13 3114.16 127.159   1
  -1   4  13 3257.57 128.543   6
  -1   4  12 20.9146 24.9952   6
   1  -4 -12-19.0592 30.3271   1
  -1   4  11 1158.18 72.9669   6
  -1   4  11 1100.18 38.8430   2
   1  -4 -11 1099.18 71.6059   1
  -1   4  10 681.514 29.5852   4
   1  -4 -10 795.010 57.7921   1
  -1   4  10 778.815 58.7211   6
  -1   4  10 756.569 31.1987   2
   1  -4  -9 77.9176 29.2074   1
  -1   4   9 75.0390 11.1847   4
  -1   4   9 77.8063 11.5027   2
  -1   4   9 102.221 27.6791   6
   1  -4  -8 1459.47 72.3952   1
  -1   4   8 1566.66 74.0731   6
  -1   4   8 1356.41 32.9506   4
  -1   4   8 1462.73 35.0600   2
   1  -4  -7 5601.11 127.382   1
  -1   4   7 5826.06 130.016   6
  -1   4   7 4976.90 54.1973   2
   1  -4  -6 2749.95 87.2900   1
  -1   4   6 2284.05 31.1173   4
  -1   4   6 2876.37 87.2623   6
  -1   4   5 2919.21 84.3400   6
   1  -4  -5 2751.42 82.3831   1
   1  -4  -4 10852.6 150.472   1
  -1   4   4 11234.1 154.993   6
  -1   4   3 15951.7 174.747   6
   1  -4  -3 15807.5 171.534   6
   1  -4  -3 15764.1 170.129   1
  -1   4   3 16148.2 173.086   1
   1  -4  -2 8468.02 70.4543   4
  -1   4   2 8504.41 122.384   6
   1  -4  -2 8498.52 120.453   6
   1  -4  -2 8645.38 121.283   1
   1  -4  -2 8575.47 70.0412   2
  -1   4   2 8304.20 68.3466   4
  -1   4   1 4321.73 56.9797   4
  -1   4   1 4066.54 82.4590   6
   1  -4  -1 4199.31 81.4554   1
   1  -4  -1 4291.16 56.5141   2
   1  -4  -1 4457.86 83.9544   6
   1  -4  -1 4253.57 56.7613   4
   1  -4   0 6749.39 80.4078   2
   1  -4   0 6662.40 79.9422   4
   1  -4   0 6644.30 91.5239   5
   1  -4   0 6487.38 97.3537   6
  -1   4   0 6648.95 81.2031   4
  -1   4   0 6378.07 98.2139   6
  -1   4  -1 2117.47 52.9732   4
   1  -4   1 2116.99 50.7480   5
  -1   4  -1 1931.96 48.2856   5
   1  -4   1 1978.29 54.2077   6
  -1   4  -1 1824.69 52.9371   6
   1  -4   1 2216.11 53.5927   4
   1  -4   2 419.794 27.9865   4
   1  -4   2 318.227 22.6933   5
  -1   4  -2 391.007 28.7211   4
  -1   4  -2 348.475 23.5722   5
  -1   4  -2 333.696 26.9998   6
   1  -4   2 372.781 26.4305   6
  -1   4  -3 5020.25 76.1293   5
  -1   4  -3 5163.96 94.7247   4
   1  -4   3 5353.05 93.8066   4
   1  -4   3 5339.48 76.4289   5
   1  -4   3 5268.93 87.2912   6
   1  -4   3 5364.05 76.6797   3
  -1   4  -4 3855.11 70.3846   5
  -1   4  -4 4034.55 90.1018   4
   1  -4   4 3932.69 86.2050   4
  -1   4  -4 3920.38 69.4952   3
   1  -4   4 3697.65 69.1033   3
   1  -4   4 3976.55 69.7424   5
   1  -4   5 4293.65 76.3776   5
  -1   4  -5 4145.11 98.3888   4
   1  -4   5 4410.22 76.9046   3
  -1   4  -5 4336.66 77.3172   5
  -1   4  -5 4471.85 78.6733   3
   1  -4   6 3333.08 72.4226   5
   1  -4   6 3293.18 72.0244   3
  -1   4  -6 3304.43 90.9774   4
  -1   4  -6 3448.15 73.7822   3
  -1   4  -6 3299.12 72.6871   5
   1  -4   6 3372.61 77.5175   1
   1  -4   7 3433.18 78.8670   5
  -1   4  -7 3210.25 94.0592   4
   1  -4   7 3162.55 74.3487   3
  -1   4  -7 3202.80 77.1563   5
  -1   4  -7 3343.07 78.2481   3
  -1   4  -8 5536.29 107.665   5
   1  -4   8 5457.66 105.778   3
  -1   4  -8 5515.34 128.390   4
  -1   4  -9 3670.67 111.641   4
   1  -4   9 3692.53 93.6020   3
  -1   4  -9 3528.73 92.5540   5
  -1   4 -10 612.192 42.8648   5
  -1   4 -10 570.526 48.8905   4
   1  -4  10 653.149 44.8774   3
   1  -4  11 858.303 53.9364   3
  -1   4 -11 906.726 53.9445   5
  -1   4 -11 915.225 62.8160   4
   1  -4  12 114.336 29.1504   3
  -1   4 -12 109.925 32.1136   4
  -1   4 -12 100.485 24.2176   5
  -1   4 -13 3.41275 25.2390   4
  -1   4 -13 3.01372 20.0710   5
   1  -4  13 42.0704 23.7548   3
  -1   4 -14 1386.55 76.4063   5
   1  -4  14 1399.91 81.3170   2
   1  -4  14 1445.49 79.8616   3
  -1   4 -14 1438.75 86.1830   4
   1  -4  15 315.063 50.5612   6
   1  -4  15 224.176 39.4877   3
  -1   4 -15 233.667 44.3195   4
  -1   4 -15 223.290 37.0237   5
   1  -4  15 255.252 43.1582   2
   1  -4  16 212.683 43.6857   6
   1  -4  16 176.621 42.4697   2
   1  -4  16 197.914 39.2609   3
  -1   4 -16 121.468 35.6623   5
  -1   4 -17 784.020 67.3648   5
   1  -4  17 796.563 68.4072   6
   1  -4  17 814.557 74.6185   2
   1  -4  17 824.556 70.2901   3
   1  -4  18 435.257 56.9569   3
  -1   4 -18 439.444 55.9278   5
   1  -4  18 505.263 60.5803   6
   1  -4  18 381.001 62.4190   2
   1  -4  19 739.190 78.9575   2
   1  -4  19 612.274 68.2042   6
   1  -3 -19 500.385 97.4850   1
  -1   3  19 46.6212 33.4995   6
   1  -3 -18 51.9382 55.8312   1
  -1   3  18 27.5604 33.7447   6
   1  -3 -17 317.767 67.8570   1
  -1   3  17-28.6314 33.7501   6
  -1   3  16 28.0706 30.0203   6
   1  -3 -16 156.695 53.2510   1
   1  -3 -15 244.991 54.5215   1
  -1   3  15 100.912 36.8163   6
   1  -3 -14 750.129 85.0881   1
  -1   3  14 352.687 46.7378   6
   1  -3 -13 39.2242 33.0405   1
  -1   3  13-0.07367 23.5219   6
   1  -3 -12 811.058 67.3357   1
  -1   3  12 847.196 63.9165   6
  -1   3  11 106.461 30.3705   6
   1  -3 -11 91.7537 28.2008   1
  -1   3  10 199.978 20.4084   4
  -1   3  10 164.195 31.2527   6
   1  -3 -10 137.589 29.0155   1
  -1   3   9 18.9784 12.9651   4
  -1   3   9-0.76988 20.1889   6
   1  -3  -9-2.86744 25.1242   1
   1  -3  -8 30.5825 19.6233   1
  -1   3   8 15.7121 11.1746   4
  -1   3   8 13.3869 20.9673   6
  -1   3   7 2008.50 44.1588   4
  -1   3   7 2069.89 74.3813   6
   1  -3  -7 1896.72 74.9173   1
  -1   3   6 3645.12 52.1347   2
  -1   3   6 3503.46 51.6814   4
  -1   3   6 3608.52 92.2860   6
   1  -3  -6 3533.45 92.0851   1
   1  -3  -5 9351.97 135.393   1
  -1   3   5 9175.55 71.3975   2
  -1   3   5 8608.97 70.6327   4
  -1   3   5 9654.16 139.711   6
   1  -3  -4 4203.83 87.3282   6
   1  -3  -4 4165.24 89.3889   3
  -1   3   4 4293.19 86.8470   1
  -1   3   4 3777.10 40.5499   2
   1  -3  -4 4060.42 85.8242   1
  -1   3   4 4138.88 87.3265   6
  -1   3   3 16410.6 158.690   1
   1  -3  -3 16327.0 158.241   3
   1  -3  -3 15827.8 154.243   1
  -1   3   3 16103.1 158.994   6
   1  -3  -3 15803.4 156.255   6
   1  -3  -2 377.173 27.2026   1
   1  -3  -2 358.734 26.2976   6
  -1   3   2 355.032 14.1832   2
  -1   3   2 344.314 13.9988   4
   1  -3  -2 262.632 11.5525   4
  -1   3   2 324.053 27.7334   6
  -1   3   2 342.009 26.4002   1
   1  -3  -2 347.027 14.1977   2
  -1   3   1 11984.0 121.505   6
   1  -3  -1 11743.4 85.0539   4
  -1   3   1 11973.8 84.7025   4
   1  -3  -1 12095.4 85.3749   2
  -1   3   1 12252.2 85.0851   2
   1  -3  -1 12302.3 122.256   6
   1  -3   0 17027.3 114.457   4
   1  -3   0 17193.9 114.747   2
   1  -3   0 16603.3 135.257   6
   1  -3   0 16967.0 122.795   5
  -1   3   0 16902.0 115.912   4
  -1   3   0 16439.1 135.955   6
   1  -3   1 10759.9 104.520   4
   1  -3   1 10256.9 89.5871   5
   1  -3   1 10226.6 105.301   6
   1  -3   1 10987.5 104.445   2
  -1   3  -1 9801.04 105.059   6
  -1   3  -1 10674.2 103.794   4
  -1   3  -1 10167.8 87.4657   5
  -1   3  -2 33367.5 200.027   4
   1  -3   2 34184.5 199.903   4
   1  -3   2 33654.9 157.191   5
  -1   3  -2 33730.5 157.783   5
   1  -3   2 33900.1 194.571   6
   1  -3   2 34191.8 155.890   3
   1  -3   3 1241.19 45.3844   4
   1  -3   3 1258.19 32.4109   5
  -1   3  -3 1280.93 45.7047   4
  -1   3  -3 1305.29 34.0130   5
  -1   3  -3 1289.89 34.2898   3
   1  -3   3 1116.42 32.2684   3
   1  -3   4 858.108 29.9142   5
  -1   3  -4 842.547 30.2728   5
   1  -3   4 893.512 41.8125   4
  -1   3  -4 806.410 41.6919   4
   1  -3   4 849.472 29.4419   3
  -1   3  -4 839.663 30.5786   3
  -1   3  -5 0.52043 11.7091   5
  -1   3  -5 6.92096 18.6622   4
   1  -3   5 13.7765 17.6957   4
   1  -3   5-20.9613 18.1446   1
  -1   3  -5 3.31589 13.3356   3
   1  -3   5 5.90764 10.3020   5
  -1   3  -6 2042.16 70.4387   4
  -1   3  -6 2122.55 56.5975   5
  -1   3  -6 2216.19 58.0055   3
   1  -3   6 2055.36 62.5297   1
   1  -3   6 1989.15 54.5629   3
  -1   3  -7 5184.57 94.7554   3
  -1   3  -7 5085.88 113.435   4
  -1   3  -7 4945.30 94.0979   5
   1  -3   7 5082.76 95.6044   3
  -1   3  -8 647.943 38.4226   5
  -1   3  -8 657.311 46.1768   4
   1  -3   8 649.140 39.4294   3
  -1   3  -9 1416.85 67.2370   4
  -1   3  -9 1288.85 56.6970   5
   1  -3   9 1404.37 60.1760   3
  -1   3  -9 1393.77 60.7700   1
  -1   3 -10 1315.83 67.5754   4
   1  -3  10 1191.96 59.5692   3
  -1   3 -10 1221.59 58.5065   5
  -1   3 -10 1210.20 60.2550   1
  -1   3 -11 2177.45 82.0472   5
   1  -3  11 2135.32 82.5752   3
  -1   3 -11 2080.55 83.1200   1
  -1   3 -11 2157.30 92.1415   4
  -1   3 -12 1476.00 78.4391   4
   1  -3  12 1535.56 74.0529   3
  -1   3 -12 1455.75 73.1334   1
  -1   3 -12 1463.58 72.3346   5
   1  -3  13 233.931 35.5708   2
  -1   3 -13 153.456 31.1948   1
   1  -3  13 259.826 37.8664   3
  -1   3 -13 227.209 33.7617   5
  -1   3 -13 254.269 37.6224   4
  -1   3 -14 403.033 45.1448   5
  -1   3 -14 289.968 39.8915   1
   1  -3  14 400.997 46.6986   3
   1  -3  14 405.061 47.6906   6
  -1   3 -14 384.145 47.5789   4
   1  -3  14 361.398 46.1052   2
  -1   3 -15 1220.67 79.8805   4
   1  -3  15 1162.16 78.8421   6
   1  -3  15 1195.92 76.3301   2
  -1   3 -15 1109.46 74.2598   5
  -1   3 -15 924.223 61.7380   1
   1  -3  15 1293.63 78.3938   3
  -1   3 -16 607.076 59.3749   1
   1  -3  16 644.739 63.0634   6
   1  -3  16 597.315 61.8003   2
   1  -3  16 596.054 58.3983   3
  -1   3 -16 684.357 62.2401   5
   1  -3  17 1047.43 78.8315   3
   1  -3  17 980.254 79.1880   2
  -1   3 -17 1067.56 77.8066   5
   1  -3  17 1010.34 80.5176   6
   1  -3  18 805.733 74.2243   2
   1  -3  18 900.062 74.7308   3
   1  -3  18 808.051 75.9325   6
  -1   3 -18 780.181 71.6485   5
   1  -3  19 119.258 40.2228   3
   1  -3  19 102.169 39.4987   6
  -1   2  20 56.2020 39.6855   6
   1  -2 -19 117.815 49.6832   5
  -1   2  19 17.9856 33.3141   6
   1  -2 -18 82.4622 42.3931   5
  -1   2  18 36.9618 32.8602   6
   1  -2 -17 17.3020 44.7121   1
  -1   2  17 11.8806 32.3978   6
   1  -2 -16 132.380 50.3010   1
  -1   2  16 42.0666 28.0984   6
   1  -2 -15 204.970 52.5222   1
  -1   2  15-19.7886 24.9651   6
   1  -2 -14 601.718 62.4267   1
  -1   2  14 541.410 59.9809   3
  -1   2  14 624.336 58.1281   6
  -1   2  13 208.163 35.6445   6
   1  -2 -13 224.140 41.2591   1
  -1   2  13 175.060 38.5859   3
  -1   2  12 211.131 34.3829   6
   1  -2 -12 211.990 43.2733   1
  -1   2  12 245.156 38.6248   3
   1  -2 -11 3.26746 23.4970   1
  -1   2  11 0.34371 19.9043   6
  -1   2  11-6.97565 24.0473   3
  -1   2  10 1560.56 78.3755   3
   1  -2 -10 1557.80 74.4919   1
  -1   2  10 1611.10 74.6285   6
   1  -2  -9 1111.45 61.2499   1
  -1   2   9 1157.66 45.4429   4
  -1   2   9 1173.83 63.7740   3
  -1   2   9 1205.68 62.1449   6
  -1   2   8-5.52066 20.9817   3
  -1   2   8 23.0769 20.8694   6
  -1   2   8 3.00845 12.1377   4
   1  -2  -8-22.4615 22.4948   1
   1  -2  -7 155.820 25.6205   1
  -1   2   7 159.641 28.0561   3
  -1   2   7 174.704 26.8395   6
  -1   2   7 152.777 17.8793   4
  -1   2   6 1884.40 62.6762   6
   1  -2  -6 1832.29 61.9334   1
  -1   2   6 1847.51 44.3925   4
  -1   2   6 1841.80 66.8448   3
   1  -2  -5 6834.24 108.457   6
  -1   2   5 6779.28 107.803   6
  -1   2   5 6824.94 106.694   1
   1  -2  -5 6671.06 105.263   1
   1  -2  -5 6829.49 115.291   3
  -1   2   5 6655.06 73.3230   4
  -1   2   5 6592.86 111.605   3
  -1   2   4 2908.99 69.5030   3
   1  -2  -4 2898.26 65.0516   1
   1  -2  -4 2957.02 66.6726   6
  -1   2   4 2946.99 66.3264   6
  -1   2   4 2998.88 43.9932   2
  -1   2   4 2973.21 66.2269   1
   1  -2  -4 2929.64 73.6006   3
   1  -2  -3 5.02146 13.7711   6
  -1   2   3 2.92654 15.0913   6
   1  -2  -3 15.7379 18.2955   3
  -1   2   3 10.5469 19.0634   3
   1  -2  -3 10.0542 15.0477   1
  -1   2   3 14.5117 15.4695   1
  -1   2   3 8.65759 8.30154   2
   1  -2  -2 7735.67 89.2989   1
  -1   2   2 7658.90 90.2072   1
   1  -2  -2 7452.09 87.7532   6
  -1   2   2 7616.24 90.0912   6
   1  -2  -2 7472.02 57.1428   2
   1  -2  -2 7947.55 90.9669   3
  -1   2   2 7301.87 56.6757   2
   1  -2  -1 1502.00 27.5903   2
   1  -2  -1 1507.76 28.1508   4
  -1   2   1 1657.12 39.9948   6
  -1   2   1 1578.28 28.8881   2
  -1   2   1 1519.94 28.8529   4
   1  -2  -1 1641.45 39.5927   6
   1  -2   0 4523.62 60.6265   6
   1  -2   0 5171.91 56.8596   4
   1  -2   0 5209.26 59.3729   2
  -1   2   0 5297.50 67.1591   6
  -1   2   0 5268.63 57.5425   2
  -1   2   0 5184.51 56.7962   4
   1  -2   1 3791.05 56.2679   4
  -1   2  -1 3745.76 55.2981   4
   1  -2   1 3902.42 58.5521   2
  -1   2  -1 4020.77 40.1128   5
   1  -2   1 3803.08 57.1300   6
   1  -2   1 3922.98 40.6582   5
  -1   2  -1 3821.57 57.4480   2
   1  -2   2 115.580 7.35341   5
   1  -2   2 244.955 20.8225   2
  -1   2  -2 248.921 21.1599   4
   1  -2   2 207.412 19.7961   4
  -1   2  -2 170.895 11.2120   3
   1  -2   2 270.079 13.5584   3
  -1   2  -2 187.859 11.1772   5
   1  -2   3 2273.34 49.6219   1
   1  -2   3 2392.99 55.1730   4
   1  -2   3 2423.28 39.1385   3
   1  -2   3 2435.76 39.3526   5
   1  -2   3 2323.31 53.7362   2
  -1   2  -3 2449.84 40.1392   3
  -1   2  -3 2343.55 55.7840   4
  -1   2  -3 2340.23 39.2681   5
  -1   2  -4 45.8304 13.4885   5
   1  -2   4 48.7833 19.3456   4
   1  -2   4-30.9485 18.1814   1
  -1   2  -4 49.5227 14.2100   3
   1  -2   4 31.6105 10.6299   3
  -1   2  -4 69.1944 21.3406   4
  -1   2  -5 425.705 32.9331   1
  -1   2  -5 485.575 35.6952   4
  -1   2  -5 430.389 27.5862   3
   1  -2   5 452.503 29.0099   3
  -1   2  -5 411.077 26.6917   5
   1  -2   5 378.261 32.1943   4
   1  -2   5 509.656 34.8857   1
  -1   2  -6 150.963 20.7955   5
   1  -2   6 154.588 23.1912   3
  -1   2  -6 140.918 19.5780   3
   1  -2   6 236.565 29.6862   1
   1  -2   6 121.870 23.5750   4
  -1   2  -6 118.963 24.4125   1
  -1   2  -6 132.307 26.6924   4
  -1   2  -7 525.449 43.8372   1
  -1   2  -7 395.640 29.4638   5
  -1   2  -7 424.237 35.4552   4
   1  -2   7 389.181 30.8811   3
  -1   2  -7 488.209 32.0093   3
  -1   2  -8 908.198 45.2251   5
   1  -2   8 859.501 45.4630   3
  -1   2  -8 821.725 48.0159   1
  -1   2  -8 854.691 49.3284   4
  -1   2  -9 1478.11 66.5647   4
   1  -2   9 1553.97 63.6953   3
  -1   2  -9 1455.17 63.7118   1
  -1   2  -9 1496.92 61.2606   5
   1  -2  10 348.943 36.2202   3
  -1   2 -10 378.564 39.3591   4
  -1   2 -10 347.750 35.9420   5
  -1   2 -10 302.427 36.8121   1
  -1   2 -11 409.260 42.6878   4
  -1   2 -11 377.239 40.9254   1
   1  -2  11 403.528 39.1327   3
  -1   2 -11 411.435 38.2239   5
   1  -2  11 440.028 40.1468   2
   1  -2  12 172.007 30.5981   3
   1  -2  12 140.404 30.7069   6
  -1   2 -12 155.427 31.4653   4
  -1   2 -12 190.986 33.7709   1
   1  -2  12 181.859 31.5028   2
  -1   2 -12 130.379 27.4237   5
   1  -2  13 66.1118 26.4185   6
   1  -2  13 40.0082 26.6252   3
  -1   2 -13 71.4035 28.4081   4
  -1   2 -13 66.7486 26.9059   5
  -1   2 -13 49.4250 27.8204   1
   1  -2  13 54.6930 24.2482   2
  -1   2 -14 134.056 33.5416   4
   1  -2  14 208.766 35.2386   2
   1  -2  14 180.659 39.3216   6
  -1   2 -14 191.714 35.3716   5
  -1   2 -14 189.642 37.9656   1
   1  -2  14 232.636 39.9469   3
   1  -2  15 116.096 30.6284   6
  -1   2 -15 115.156 32.6263   4
  -1   2 -15 162.483 40.0379   1
   1  -2  15 168.332 37.4995   2
  -1   2 -15 128.457 33.2476   5
   1  -2  15 208.669 38.7962   3
  -1   2 -16 123.813 37.9372   1
   1  -2  16 133.012 35.4389   3
  -1   2 -16 116.244 32.3166   5
   1  -2  16 86.0434 30.8771   6
   1  -2  16 174.002 38.3035   2
  -1   2 -17 54.7475 31.8525   5
   1  -2  17 37.8740 31.7697   6
   1  -2  17 19.7843 28.4808   3
  -1   2 -17-16.7938 45.0855   1
   1  -2  17 26.6655 32.1756   2
   1  -2  18 53.6038 32.5072   3
  -1   2 -18 125.466 37.2098   5
   1  -2  18 132.140 39.8648   6
  -1   2 -19-25.3736 34.1944   5
   1  -2  19-8.91936 33.0073   6
   1  -2  20-38.9715 40.6829   6
  -1   1  19 187.776 44.8232   6
   1  -1 -19 214.712 55.2859   5
  -1   1  18 313.757 50.2620   6
   1  -1 -18 490.725 67.9890   1
   1  -1 -18 338.862 56.8718   5
  -1   1  17 118.977 38.8335   6
   1  -1 -17 173.643 47.5484   5
  -1   1  17 193.510 46.8176   3
   1  -1 -17 199.389 49.9962   1
  -1   1  16 168.764 41.7540   3
   1  -1 -16 197.023 47.3200   1
  -1   1  16 121.111 34.8072   6
   1  -1 -16 138.526 41.7037   5
  -1   1  15 170.361 38.3482   6
   1  -1 -15 136.429 38.8495   5
  -1   1  15 97.1464 34.8646   3
  -1   1  14 319.754 46.3510   3
   1  -1 -14 506.515 55.6759   1
  -1   1  14 324.844 42.9562   6
   1  -1 -13 696.111 59.3650   1
  -1   1  13 621.773 52.9858   6
  -1   1  13 612.953 57.3573   3
  -1   1  12 872.487 65.3903   3
  -1   1  12 886.801 59.5033   6
   1  -1 -12 924.275 61.4681   1
   1  -1 -11 691.807 55.0096   1
  -1   1  11 777.876 58.7380   3
  -1   1  11 759.557 51.6196   6
  -1   1  10 3253.45 106.889   3
   1  -1 -10 3098.19 97.9031   1
  -1   1  10 3270.39 98.3021   6
  -1   1   9 1677.91 67.0202   6
   1  -1  -9 1668.71 69.5468   1
  -1   1   9 1751.68 74.6813   3
   1  -1  -8 9.98188 26.6115   1
  -1   1   8 46.1296 23.2558   3
  -1   1   8 29.4550 17.8098   6
  -1   1   8 28.8219 16.6852   4
  -1   1   7 54.0350 24.2714   3
  -1   1   7 43.1182 18.4096   6
   1  -1  -7 31.7584 18.1784   1
  -1   1   7 55.7692 16.2568   4
  -1   1   6 6.61731 12.8493   4
  -1   1   6-15.8169 19.4647   3
   1  -1  -6-0.71287 15.6171   6
   1  -1  -6 14.2720 17.9500   1
  -1   1   6 0.93773 15.5500   1
  -1   1   6 8.96352 16.3016   6
  -1   1   5 636.936 32.4685   1
   1  -1  -5 652.091 32.9104   6
  -1   1   5 676.129 34.0993   6
   1  -1  -5 635.906 37.6814   3
  -1   1   5 671.046 28.8155   4
   1  -1  -5 607.077 32.8387   1
  -1   1   5 691.478 37.9057   3
  -1   1   4 377.585 25.5062   6
   1  -1  -4 331.417 29.0451   3
   1  -1  -4 382.782 26.3466   1
  -1   1   4 406.084 25.5019   1
   1  -1  -4 351.449 24.2225   6
  -1   1   4 417.588 29.4662   3
  -1   1   3 2165.88 45.1382   6
   1  -1  -3 2159.67 51.5449   3
   1  -1  -3 2178.41 44.7310   1
  -1   1   3 2212.63 39.6397   2
  -1   1   3 2115.29 51.1808   3
  -1   1   3 2238.84 45.3868   1
   1  -1  -3 2129.41 44.9764   6
  -1   1   2 1448.31 29.2015   2
  -1   1   2 1519.74 36.5790   3
   1  -1  -2 1439.02 37.6372   3
  -1   1   2 1411.15 32.9045   1
   1  -1  -2 1429.31 32.9011   1
  -1   1   2 1424.96 32.7767   6
   1  -1  -2 1520.83 29.8907   2
   1  -1  -2 1451.84 32.8699   6
  -1   1  -2 33.0783 12.6189   2
   1  -1   2 20.2799 12.5350   1
   1  -1   2 33.3792 11.7613   4
  -1   1  -2 33.0347 12.8707   4
  -1   1  -2 46.5469 13.1323   1
   1  -1   2 16.9266 10.7154   2
   1  -1   3 59.2245 19.8717   1
  -1   1  -3 14.5952 14.6056   4
   1  -1   3 67.1154 13.3655   3
   1  -1   3 41.9413 15.7715   4
  -1   1  -3 50.8133 13.0791   3
   1  -1   3 49.1105 17.7943   2
  -1   1  -3 42.1670 17.9732   1
   1  -1   4 1228.71 41.8377   4
   1  -1   4 1491.59 50.3276   1
  -1   1  -4 1353.27 43.7044   4
   1  -1   4 1290.34 37.6997   3
   1  -1   4 1279.11 41.5976   2
  -1   1  -4 1128.61 43.5294   1
  -1   1  -4 1258.92 36.8135   3
   1  -1   5 673.186 32.0527   3
   1  -1   5 666.794 34.2615   4
  -1   1  -5 732.654 32.2854   3
   1  -1   5 620.838 33.2652   2
  -1   1  -5 647.107 35.3246   4
   1  -1   5 667.429 36.6132   1
  -1   1  -5 651.640 36.0300   1
   1  -1   6 12.2900 15.7922   3
  -1   1  -6-5.63871 14.1969   3
   1  -1   6 16.4063 15.1986   2
   1  -1   6-3.84381 17.0663   1
  -1   1  -6 5.47728 17.0824   4
   1  -1   6 8.75845 14.8750   4
  -1   1  -6 12.5711 16.4815   1
  -1   1  -7 757.081 43.6149   1
  -1   1  -7 781.694 40.2312   3
  -1   1  -7 731.844 42.5343   4
   1  -1   7 786.120 40.6794   3
   1  -1   7 708.714 38.9047   2
  -1   1  -8 1205.90 56.9692   1
   1  -1   8 1157.85 53.0861   3
  -1   1  -8 1142.58 53.3047   4
   1  -1   8 1085.97 49.8993   2
  -1   1  -9 57.9013 28.3494   1
   1  -1   9 54.2430 23.0758   3
   1  -1   9 56.4966 21.2660   2
  -1   1  -9 70.2517 23.5974   4
  -1   1 -10 187.494 35.0730   1
   1  -1  10 147.534 29.8655   3
   1  -1  10 166.777 28.9146   2
  -1   1 -10 119.549 28.3379   4
   1  -1  10 105.489 28.5148   6
   1  -1  11 279.138 36.2645   3
  -1   1 -11 251.675 34.0693   4
   1  -1  11 217.690 35.6948   6
  -1   1 -11 291.679 40.0091   1
   1  -1  11 266.275 32.7182   2
  -1   1 -12 283.422 41.6332   1
   1  -1  12 244.052 38.5882   6
   1  -1  12 330.958 40.5880   3
   1  -1  12 324.699 35.7284   2
  -1   1 -12 313.401 38.4607   4
   1  -1  13 519.402 51.9159   6
  -1   1 -13 541.856 52.5575   1
  -1   1 -13 536.284 47.6991   4
  -1   1 -13 593.612 52.2073   5
   1  -1  13 479.831 44.9970   2
   1  -1  13 579.963 51.9120   3
   1  -1  14 37.2396 25.7744   2
   1  -1  14 65.2209 29.1637   6
  -1   1 -14 56.0455 26.6484   5
   1  -1  14 52.8120 27.1466   3
  -1   1 -14 52.1738 25.8271   4
  -1   1 -14 55.0320 33.2905   1
   1  -1  15 13.1257 31.0469   3
  -1   1 -15 19.8676 27.8290   5
   1  -1  15-5.84923 31.1119   6
  -1   1 -15 60.8963 45.4082   1
   1  -1  15 66.6605 30.4354   2
  -1   1 -16 66.0050 41.4386   1
  -1   1 -16-22.6524 27.5854   5
   1  -1  16-12.4172 26.9142   2
   1  -1  16-9.27848 27.4927   6
   1  -1  17 35.8346 32.5771   6
  -1   1 -17 1.68384 44.1539   1
  -1   1 -17 9.76304 28.2124   5
   1  -1  18-22.3138 35.0299   6
  -1   1 -18 9.28230 32.1432   5
  -1   1 -19-11.9659 32.3096   5
   1  -1  19 22.8806 34.2210   6
   1  -1  20 64.1373 37.3379   6
  -1   0  19 72.0036 47.0837   3
   1   0 -19 67.6365 39.8843   5
  -1   0  19 95.1214 38.0159   6
   1   0 -18-14.2961 34.5556   5
  -1   0  18 44.9455 36.0696   3
   1   0 -18 110.147 50.2131   1
  -1   0  18 33.0550 27.9426   6
   1   0 -17-15.1252 30.0538   5
  -1   0  17 33.3054 29.2595   6
   1   0 -17 90.3023 43.8829   1
  -1   0  17 47.4114 31.8508   3
   1   0 -16 121.256 40.4005   1
  -1   0  16 38.3614 34.3012   3
   1   0 -16 39.9337 30.8845   5
  -1   0  16 44.5401 29.4371   6
   1   0 -15 570.395 61.7669   5
  -1   0  15 519.460 51.8353   6
  -1   0  15 565.646 62.9374   3
   1   0 -14 670.070 59.7091   1
   1   0 -14 618.511 59.3425   5
  -1   0  14 597.238 52.5725   6
  -1   0  14 586.958 57.6457   3
  -1   0  13 899.723 65.3606   3
   1   0 -13 1146.30 73.3659   1
  -1   0  13 836.862 58.0995   6
   1   0 -13 900.907 65.4857   5
   1   0 -12 436.715 42.8839   1
  -1   0  12 379.208 44.7588   3
   1   0 -12 390.088 43.9002   5
  -1   0  12 406.316 40.3693   6
  -1   0  11 494.454 41.7358   6
  -1   0  11 479.757 46.4557   3
   1   0 -11 509.399 43.2667   1
  -1   0  10 1532.48 65.4170   6
  -1   0  10 1457.94 71.5503   3
   1   0 -10 1442.47 63.8643   1
   1   0  -9 272.585 35.7367   1
  -1   0   9 212.455 30.2414   3
  -1   0   9 186.110 25.5619   6
  -1   0   8 1866.67 71.4267   3
  -1   0   8 1843.52 62.4478   6
   1   0  -8 2092.63 70.9306   1
  -1   0   7 29.0921 16.1033   6
  -1   0   7 23.4655 21.7896   3
   1   0  -7 22.6911 16.7279   1
  -1   0   7 21.8435 15.8560   1
  -1   0   7 42.5944 16.1774   4
  -1   0   6 525.726 36.5177   3
  -1   0   6 507.283 31.4625   4
   1   0  -6 453.753 35.5310   3
  -1   0   6 515.120 30.3534   6
   1   0  -6 533.157 31.0022   1
  -1   0   6 515.522 30.8995   1
  -1   0   5 173.652 23.8580   3
  -1   0   5 160.338 19.9133   4
   1   0  -5 161.133 18.5624   1
  -1   0   5 170.684 18.5418   1
  -1   0   5 169.690 18.7711   6
   1   0  -5 190.032 23.8295   3
  -1   0   4 1232.29 34.0879   1
  -1   0   4 1233.83 43.8393   3
   1   0  -4 1195.03 33.3699   6
   1   0  -4 1211.79 34.1734   1
  -1   0   4 1245.83 34.1220   6
   1   0  -4 1343.21 44.5319   3
   1   0  -3 895.885 34.0160   3
  -1   0   3 899.674 24.3219   6
   1   0  -3 890.573 23.9447   6
  -1   0   3 836.165 32.6316   3
   1   0  -3 905.254 24.3919   1
  -1   0   3 862.583 24.0839   1
   1   0  -2 1.63232 9.51933   5
  -1   0   2 5.69434 10.2652   3
   1   0  -2 3.86481 10.4053   3
  -1   0  -2 78.9469 12.4690   4
  -1   0  -2 76.5507 13.2635   1
   1   0   2 89.6357 12.5126   4
  -1   0  -2 88.2835 12.2718   2
   1   0   2 67.5801 14.2666   1
   1   0   2 80.6690 11.9760   2
   1   0   3 19.9436 17.0291   1
   1   0   3 22.1618 12.3501   2
  -1   0  -3 44.7838 13.2049   2
  -1   0  -3 28.9191 12.7699   4
  -1   0  -3-20.8885 18.7323   1
   1   0   3 34.4677 12.4407   4
  -1   0  -3 24.9508 13.2882   3
   1   0   4 1475.96 40.3157   4
   1   0   4 1524.97 41.7409   2
  -1   0  -4 1541.64 44.1821   3
   1   0   4 1631.58 52.0830   1
  -1   0  -4 1340.85 48.4486   1
   1   0   4 1485.94 42.4053   3
  -1   0  -4 1508.16 42.1210   4
  -1   0  -5 3639.14 80.3393   1
   1   0   5 3657.27 68.3497   4
  -1   0  -5 3838.42 75.5862   3
   1   0   5 3741.18 74.0621   3
   1   0   5 3604.98 68.5502   2
   1   0   5 3973.16 87.5140   1
  -1   0  -5 3689.47 71.2479   4
   1   0   6 8114.69 109.080   4
  -1   0  -6 8652.21 113.916   4
  -1   0  -6 8424.21 122.544   3
   1   0   6 8207.24 119.600   3
   1   0   6 8058.40 108.663   2
  -1   0  -6 8148.23 127.465   1
  -1   0  -7-9.15198 16.4287   4
   1   0   7 7.20719 14.6084   4
   1   0   7 16.6076 15.5116   2
   1   0   7 14.9182 17.0888   3
   1   0   8 411.190 35.2496   3
  -1   0  -8 368.706 31.1847   4
  -1   0  -8 374.181 35.5053   1
   1   0   8 370.649 29.0003   2
   1   0   8 416.165 38.6258   6
   1   0   9 222.826 31.0416   3
   1   0   9 213.253 32.7365   6
  -1   0  -9 236.683 34.4518   1
  -1   0  -9 194.855 25.2330   4
   1   0   9 200.348 24.2151   2
  -1   0 -10 2576.55 92.1558   1
  -1   0 -10 2527.68 83.0750   4
   1   0  10 2389.95 76.5717   2
   1   0  10 2559.17 88.8962   3
   1   0  10 2497.79 94.7660   6
   1   0  11 233.215 33.7643   3
   1   0  11 204.078 28.0974   2
  -1   0 -11 192.758 29.5823   4
  -1   0 -11 214.574 37.0792   1
   1   0  11 168.856 33.5964   6
  -1   0 -12 508.037 43.2476   4
   1   0  12 557.043 51.5313   6
   1   0  12 526.733 47.5145   3
   1   0  12 488.554 39.7897   2
  -1   0 -12 581.761 61.2690   1
  -1   0 -13 154.245 29.8539   4
   1   0  13 156.364 28.1933   2
   1   0  13 179.285 34.8836   6
  -1   0 -13 167.077 39.6974   1
  -1   0 -14 474.347 57.4450   1
   1   0  14 428.597 41.7815   2
  -1   0 -14 362.500 40.6836   4
   1   0  14 391.015 49.4148   6
   1   0  15-9.80728 30.6244   6
   1   0  15 19.1162 21.5875   2
  -1   0 -15 82.3781 46.4798   1
  -1   0 -16 95.2540 44.7822   1
  -1   0 -16 14.8506 27.0957   5
   1   0  16 8.26790 30.5850   6
  -1   0 -17 262.155 58.2924   1
   1   0  17 193.329 42.1911   6
  -1   0 -17 358.115 55.8175   5
  -1   0 -18 31.0315 36.1489   5
  -1   0 -18 92.6744 54.7689   1
   1   0  18-12.9245 38.5161   6
   1   0  19-28.2107 43.6548   6
  -1   0 -19 31.1899 38.0995   5
   1   1 -20 196.568 48.6905   5
  -1  -1  20 232.504 53.2506   3
   1   1 -19 133.501 44.3702   5
  -1  -1  19 225.411 51.8174   3
  -1  -1  18 182.778 37.8973   6
   1   1 -18 192.858 44.0725   5
  -1  -1  18 212.261 49.1526   3
   1   1 -17 81.8022 40.2387   1
  -1  -1  17 97.7286 39.5779   3
  -1  -1  17 75.8082 31.8531   6
   1   1 -17 35.3937 29.8436   5
  -1  -1  16 889.970 67.2037   6
   1   1 -16 865.027 72.7938   5
   1   1 -16 979.986 70.4817   1
  -1  -1  16 816.082 71.6420   3
  -1  -1  15 149.885 30.5269   6
  -1  -1  15 129.259 36.4812   3
   1   1 -15 132.135 38.0428   5
  -1  -1  14 1853.00 85.7718   6
  -1  -1  14 1833.10 94.3500   3
   1   1 -14 1950.08 85.7847   1
   1   1 -14 1801.40 94.0151   5
   1   1 -13 516.545 51.0258   5
  -1  -1  13 487.788 44.8155   6
  -1  -1  13 581.736 56.0797   3
   1   1 -13 738.020 59.9171   1
  -1  -1  12 303.719 42.5691   3
  -1  -1  12 281.980 33.4616   6
   1   1 -12 324.096 43.7600   5
   1   1 -12 302.983 36.2253   1
   1   1 -11 4.25737 18.7641   1
  -1  -1  11 8.50733 21.3892   3
  -1  -1  11 0.22159 16.7383   6
   1   1 -11 21.8363 21.2342   5
   1   1 -10 25.7625 20.3200   5
  -1  -1  10 14.9049 18.1497   6
   1   1 -10 16.6723 16.9571   1
  -1  -1  10 20.6223 21.8328   3
  -1  -1   9 909.590 46.9702   6
   1   1  -9 1027.63 57.5787   5
  -1  -1   9 1034.57 57.0160   3
   1   1  -9 1023.56 49.6949   1
  -1  -1   8 1310.60 50.1417   6
  -1  -1   8 1146.96 56.3067   3
   1   1  -8 1182.82 58.7118   5
  -1  -1   8 1267.52 50.1493   1
  -1  -1   7 1963.01 66.7552   3
   1   1  -7 1888.45 65.7418   5
  -1  -1   7 1914.08 54.5020   6
  -1  -1   7 1813.74 55.2233   1
   1   1  -7 1802.07 52.3843   1
   1   1  -6 1544.65 54.6860   3
  -1  -1   6 1488.88 43.8420   6
  -1  -1   6 1507.68 44.2722   1
  -1  -1   6 1556.52 55.4622   3
  -1  -1   6 1570.08 54.9088   4
   1   1  -6 1459.55 55.3852   5
   1   1  -6 1394.38 41.7485   1
  -1  -1   5 2382.50 64.6312   3
   1   1  -5 2506.69 64.1310   3
  -1  -1   5 2469.05 47.7761   1
   1   1  -5 2329.51 45.5448   1
  -1  -1   5 2405.48 62.6856   4
   1   1  -5 2317.36 63.3182   5
  -1  -1   5 2385.55 47.2434   6
  -1  -1   4 876.800 37.4558   3
  -1  -1   4 858.666 24.7019   1
   1   1  -4 812.729 37.1171   3
  -1  -1   4 857.187 37.0274   5
  -1  -1   4 862.045 36.1630   4
   1   1  -4 856.408 37.0962   5
   1   1  -4 840.005 23.7439   1
  -1  -1   4 858.064 24.6170   6
  -1  -1   3 42.8508 15.3118   5
   1   1  -3 49.3083 16.3522   5
   1   1  -3 49.7774 15.1227   3
  -1  -1   3 43.9297 15.9899   3
  -1  -1   2 21.3622 12.2019   5
   1   1  -2 35.0303 12.4030   5
   1   1  -2 12.6503 13.1564   3
  -1  -1   2 35.9197 12.1938   3
   1   1   1 958.926 27.4409   5
  -1  -1  -1 960.333 24.2541   2
  -1  -1  -1 957.703 29.8721   1
  -1  -1  -1 875.604 26.8489   5
   1   1   1 920.916 23.7055   2
   1   1   1 898.197 28.3634   6
   1   1   1 980.110 30.5881   1
  -1  -1  -2 215.138 14.5503   2
   1   1   2 223.023 20.7345   6
  -1  -1  -2 234.959 14.8484   4
  -1  -1  -2 185.949 21.1229   1
   1   1   2 220.739 14.4370   2
   1   1   2 232.998 14.9402   4
   1   1   2 230.216 22.0599   1
   1   1   3 719.418 35.9298   6
  -1  -1  -3 708.379 24.2155   2
  -1  -1  -3 728.895 24.1269   4
   1   1   3 720.547 35.3556   1
   1   1   3 693.459 25.0095   4
   1   1   3 725.866 24.7815   2
  -1  -1  -3 725.723 36.2891   1
   1   1   4 629.515 36.7477   6
  -1  -1  -4 607.128 32.1024   3
  -1  -1  -4 636.977 26.0064   4
   1   1   4 635.186 38.5565   1
   1   1   4 592.174 25.3338   2
   1   1   4 573.590 25.6130   4
  -1  -1  -4 598.007 37.2501   1
  -1  -1  -5 564.718 37.2452   1
   1   1   5 561.527 38.3074   1
  -1  -1  -5 586.438 27.5656   4
   1   1   5 531.755 26.0272   2
   1   1   5 498.460 25.9011   4
  -1  -1  -5 541.914 34.7596   3
   1   1   5 545.400 36.4609   6
   1   1   6 100.619 17.5496   4
   1   1   6 91.6746 25.2614   6
  -1  -1  -6 120.979 28.5672   1
   1   1   6 100.267 17.0032   2
  -1  -1  -6 144.612 19.1223   4
  -1  -1  -6 128.125 25.6691   3
   1   1   7 196.341 20.5774   2
  -1  -1  -7 359.920 42.9194   1
   1   1   7 307.362 41.0024   6
  -1  -1  -7 228.159 22.7334   4
   1   1   7 195.659 21.3427   4
   1   1   8 628.242 34.2511   2
  -1  -1  -8 749.807 56.7618   1
   1   1   8 665.974 48.0670   6
   1   1   8 619.186 34.9171   4
  -1  -1  -8 678.197 37.0940   4
   1   1   9 115.271 26.8197   6
  -1  -1  -9 114.224 20.4497   4
  -1  -1  -9 127.228 29.5335   1
   1   1   9 97.7784 17.8371   2
   1   1  10 283.745 38.5392   6
  -1  -1 -10 253.591 28.5346   4
   1   1  10 276.126 27.1250   2
  -1  -1 -10 232.789 36.9791   1
   1   1  11 42.4619 25.8831   6
  -1  -1 -11 41.2910 18.3117   4
  -1  -1 -11 28.5363 25.5923   1
   1   1  11 28.8839 15.0322   2
  -1  -1 -12 1613.76 67.4955   4
   1   1  12 1479.53 63.0437   2
   1   1  12 1549.87 85.9717   6
  -1  -1 -13 121.117 40.3805   1
   1   1  13 104.944 24.8791   2
  -1  -1 -13 129.183 27.0177   4
   1   1  13 83.4639 30.4336   6
   1   1  14 18.7409 31.3512   6
   1   1  14 69.6910 23.4860   2
   1   1  15 315.459 47.6375   6
  -1  -1 -15 517.866 65.0968   1
  -1  -1 -16 23.0356 39.4688   1
   1   1  16-3.67214 31.2880   6
  -1  -1 -17 665.313 81.6394   1
   1   1  17 464.464 62.1729   6
  -1  -1 -18 269.995 51.9367   5
   1   1  18 271.630 50.7405   6
  -1  -1 -19 204.136 52.5161   5
   1   1  19 136.262 48.0980   6
  -1  -1 -19 274.749 84.4243   1
   1   2 -20 285.100 61.5835   5
  -1  -2  20 295.033 61.0435   3
   1   2 -19 26.0575 33.5788   5
  -1  -2  19 31.4109 39.2929   3
   1   2 -18 90.6212 35.4588   5
  -1  -2  18 96.0853 31.8446   6
  -1  -2  18 114.820 43.2200   3
   1   2 -17 763.868 73.2884   5
  -1  -2  17 803.134 64.0518   6
  -1  -2  17 739.882 71.4337   3
   1   2 -16 119.103 36.7268   5
   1   2 -16 4.24765 33.8035   1
  -1  -2  16 109.632 36.2074   3
  -1  -2  16 96.9973 28.2360   6
  -1  -2  15 849.200 71.6040   3
   1   2 -15 897.013 70.7713   5
   1   2 -15 516.334 49.9517   1
  -1  -2  15 937.230 62.7919   6
   1   2 -14 395.857 48.3274   5
  -1  -2  14 434.530 51.7163   3
  -1  -2  14 460.167 44.3331   6
   1   2 -14 457.328 44.8211   1
   1   2 -13 35.9377 28.2117   5
  -1  -2  13 18.0143 28.0610   3
   1   2 -13 95.5882 25.9684   1
  -1  -2  13 34.6833 19.7327   6
   1   2 -12 11.3521 20.4571   1
  -1  -2  12 3.02206 22.1929   3
  -1  -2  12 5.32192 18.9424   6
   1   2 -12 25.2860 22.4290   5
  -1  -2  11 1136.87 68.5364   3
   1   2 -11 1238.37 55.9711   1
  -1  -2  11 1250.54 57.3405   6
   1   2 -11 1152.93 66.6340   5
   1   2 -10 799.029 42.8462   1
  -1  -2  10 772.069 52.7866   3
  -1  -2  10 851.930 45.5171   6
   1   2 -10 769.211 53.1078   5
  -1  -2   9 1500.30 55.4335   6
  -1  -2   9 1579.65 68.3919   3
   1   2  -9 1439.58 54.1138   1
   1   2  -9 1424.83 66.4747   5
  -1  -2   9 1536.68 55.6241   1
  -1  -2   8 4358.64 84.9373   6
  -1  -2   8 4016.27 79.3787   1
   1   2  -8 3994.27 101.438   5
   1   2  -8 3965.00 77.2916   1
  -1  -2   8 4369.72 104.799   3
  -1  -2   7 7.91898 13.7814   1
   1   2  -7-9.88642 18.8390   5
  -1  -2   7-4.78242 18.7917   3
   1   2  -7 2.08073 12.7896   1
  -1  -2   6 336.134 30.6486   4
   1   2  -6 331.050 29.4878   3
  -1  -2   6 287.216 27.7796   3
  -1  -2   6 301.277 28.3265   5
  -1  -2   6 349.674 22.8154   1
   1   2  -6 332.269 30.5446   5
   1   2  -6 320.789 20.0136   1
   1   2  -5 9.46942 16.8128   5
  -1  -2   5-1.46488 16.1163   4
  -1  -2   5-56.4216 15.4327   1
  -1  -2   5-3.50466 16.8189   3
   1   2  -5 2.38280 9.76677   1
  -1  -2   5-10.9500 15.8139   5
   1   2  -5-10.0023 17.0901   3
  -1  -2   4 821.964 37.4845   5
  -1  -2   4 795.354 37.1771   3
  -1  -2   4 894.770 39.8884   4
  -1  -2   4 817.188 19.7765   1
   1   2  -4 760.820 38.1801   3
   1   2  -4 836.090 37.4087   5
  -1  -2   3 1618.15 47.8480   5
   1   2  -3 1621.27 47.3403   5
  -1  -2   3 1610.52 47.1020   3
   1   2  -3 1698.49 48.1811   3
   1   2  -2 1658.31 44.3409   3
   1   2  -2 1677.27 43.9257   5
  -1  -2   2 1581.57 42.5760   5
  -1  -2   2 1591.19 43.7048   3
   1   2  -1 495.571 17.6893   1
  -1  -2   1 689.279 21.0168   1
  -1  -2   1 738.566 21.6721   6
   1   2  -1 544.730 26.4116   5
   1   2  -1 537.288 17.7604   6
  -1  -2   1 497.803 25.3369   5
   1   2   0 1150.04 30.5418   1
  -1  -2   0 1175.62 29.9228   6
  -1  -2   0 1122.49 35.5046   5
  -1  -2   0 1080.80 28.5151   2
  -1  -2   0 1133.01 29.7399   1
   1   2   0 1161.38 36.1497   5
   1   2   0 1108.34 30.6541   6
   1   2   1 2890.07 57.9423   5
   1   2   1 2902.39 42.5003   2
  -1  -2  -1 2914.58 55.0787   6
  -1  -2  -1 2891.78 55.8533   1
   1   2   1 3001.65 56.1574   1
  -1  -2  -1 2988.82 58.1971   5
  -1  -2  -1 2977.24 43.7313   2
   1   2   1 2933.56 55.5003   6
  -1  -2  -2 879.906 37.1773   6
  -1  -2  -2 811.184 35.1390   1
   1   2   2 813.979 22.9016   2
   1   2   2 799.735 35.5502   1
  -1  -2  -2 845.454 23.2369   4
  -1  -2  -2 828.241 22.8605   2
   1   2   2 855.472 35.3653   6
  -1  -2  -3-5.15520 16.8959   1
  -1  -2  -3 12.3502 16.0914   6
  -1  -2  -3 8.66928 9.04166   4
   1   2   3-7.32842 8.63479   2
   1   2   3-0.65185 17.5973   6
   1   2   3-0.64284 17.1456   1
  -1  -2  -3 6.94359 8.53837   2
  -1  -2  -4 38.9376 20.5490   1
  -1  -2  -4 36.9967 9.87070   4
   1   2   4 36.9587 17.5040   6
   1   2   4 24.8734 18.1324   1
   1   2   4 35.3313 9.95455   4
   1   2   4 38.4994 10.1085   2
  -1  -2  -4 34.9606 9.82681   2
  -1  -2  -5 138.177 22.4516   3
  -1  -2  -5 120.979 13.2830   4
   1   2   5 119.047 22.6194   6
   1   2   5 112.288 13.4869   2
   1   2   5 124.177 14.0701   4
  -1  -2  -5 103.752 23.3749   1
  -1  -2  -6 361.566 22.0810   4
   1   2   6 295.472 34.1348   6
  -1  -2  -6 312.149 36.8282   1
   1   2   6 323.494 20.7642   2
   1   2   6 315.879 21.1278   4
  -1  -2  -7 1020.25 62.1219   1
   1   2   7 1023.41 37.9338   4
   1   2   7 1083.21 58.3134   6
  -1  -2  -7 1062.35 38.6041   4
   1   2   7 1029.77 37.3262   2
  -1  -2  -8 463.942 29.1343   4
  -1  -2  -8 583.545 57.4519   1
   1   2   8 479.297 43.7442   6
   1   2   8 503.800 29.5051   4
   1   2   8 444.351 27.5417   2
  -1  -2  -9 84.7269 27.8649   1
  -1  -2  -9 89.4074 17.8387   4
   1   2   9 56.2013 15.1558   4
   1   2   9 55.4812 14.6902   2
   1   2   9 87.4681 26.9711   6
  -1  -2 -10 49.3447 30.0002   1
   1   2  10 15.1559 13.1510   2
   1   2  10-5.37657 20.7135   6
  -1  -2 -10-2.71487 14.1163   4
   1   2  11 268.252 27.1245   2
   1   2  11 250.522 37.8218   6
  -1  -2 -11 309.471 44.1056   1
  -1  -2 -11 250.371 26.8949   4
  -1  -2 -12 210.096 28.2464   4
   1   2  12 165.987 34.2776   6
   1   2  12 177.555 24.0864   2
   1   2  13 513.024 38.7604   2
   1   2  13 540.208 57.6023   6
  -1  -2 -13 565.628 63.6443   1
   1   2  14 792.518 68.7753   6
  -1  -2 -14 1316.63 97.1439   1
   1   2  15 206.838 42.9527   6
  -1  -2 -15 319.219 54.3743   1
   1   2  16 27.0421 30.8322   6
  -1  -2 -16 62.1893 43.9656   1
   1   2  17 191.431 47.0012   6
  -1  -2 -17 324.744 68.5609   1
   1   2  18 267.038 54.3012   6
  -1  -2 -18 543.228 86.3895   1
  -1  -2 -19 154.577 53.3117   5
  -1  -3  20 349.977 61.5495   3
   1   3 -20 225.369 49.1932   5
   1   3 -19 140.731 42.2614   5
  -1  -3  19 179.753 48.0343   3
   1   3 -18 193.695 46.5530   5
  -1  -3  18 231.242 47.8537   3
  -1  -3  17 39.8351 24.4372   6
   1   3 -17 84.8398 34.0692   5
  -1  -3  17 53.0887 34.4733   3
  -1  -3  16 1167.58 82.6298   3
   1   3 -16 1177.80 82.3371   5
   1   3 -16 900.505 58.9713   1
  -1  -3  16 1191.95 72.0362   6
  -1  -3  15 1347.28 86.0327   3
  -1  -3  15 1378.90 73.7987   6
   1   3 -15 1295.54 83.9991   5
  -1  -3  14 805.928 65.7245   3
   1   3 -14 608.102 45.1075   1
   1   3 -14 742.679 62.3709   5
  -1  -3  14 787.534 54.1660   6
   1   3 -13 2845.09 110.309   5
  -1  -3  13 3080.42 115.084   3
  -1  -3  13 2929.06 93.7074   6
   1   3 -13 2796.07 88.8008   1
  -1  -3  12 2072.07 75.9025   6
   1   3 -12 1974.56 72.2770   1
   1   3 -12 2003.95 90.3061   5
  -1  -3  12 2108.46 92.6518   3
  -1  -3  11 1090.41 64.5007   3
  -1  -3  11 1175.07 53.9189   6
   1   3 -11 1137.77 66.1467   5
   1   3 -11 1164.60 53.2912   1
  -1  -3  10 6492.77 113.841   6
  -1  -3  10 6474.62 142.537   3
   1   3 -10 6326.86 113.053   1
   1   3 -10 6507.80 144.444   5
  -1  -3   9 1843.43 59.0399   1
   1   3  -9 1791.01 55.0992   1
   1   3  -9 1910.22 75.1444   5
  -1  -3   9 2016.15 78.7412   3
  -1  -3   8 1774.33 54.2700   1
   1   3  -8 1607.60 66.3389   5
  -1  -3   8 1686.86 67.9549   3
   1   3  -7 12593.0 171.481   5
  -1  -3   7 12685.3 122.436   1
  -1  -3   7 12435.7 167.143   3
   1   3  -6 1940.13 65.1629   5
  -1  -3   6 1936.31 65.3676   3
  -1  -3   6 1898.45 41.4907   1
  -1  -3   5 3038.64 46.3825   1
   1   3  -5 3142.57 75.6094   3
   1   3  -5 3037.26 76.3176   5
  -1  -3   5 3120.53 80.5204   4
  -1  -3   5 3000.94 75.9178   5
  -1  -3   5 3021.65 76.2166   3
  -1  -3   4 625.011 36.1442   5
   1   3  -4 661.075 36.3894   3
  -1  -3   4 672.978 37.7181   4
  -1  -3   4 645.110 20.4974   6
  -1  -3   4 605.649 36.0230   3
   1   3  -4 596.217 34.0953   5
   1   3  -3 12757.8 83.5306   6
  -1  -3   3 12687.5 135.461   5
  -1  -3   3 12752.4 137.634   3
  -1  -3   3 12836.4 141.722   4
  -1  -3   3 12711.6 83.1645   6
   1   3  -3 12649.3 136.169   5
   1   3  -3 12932.8 139.249   3
  -1  -3   2 25573.0 126.450   1
  -1  -3   2 25172.8 186.337   3
   1   3  -2 25041.7 188.828   5
  -1  -3   2 25665.4 185.466   5
  -1  -3   2 25372.7 126.254   6
   1   3  -2 25088.1 127.111   6
  -1  -3   1 25746.0 142.096   1
   1   3  -1 25459.8 142.747   1
  -1  -3   1 25780.0 144.127   6
   1   3  -1 25243.4 143.809   6
   1   3  -1 24904.5 186.393   5
  -1  -3   1 25334.5 186.538   5
   1   3   0 5101.29 74.9105   6
  -1  -3   0 5367.87 75.1005   1
  -1  -3   0 5445.37 75.9351   6
   1   3   0 4915.97 86.1238   5
  -1  -3   0 4943.17 83.2948   5
   1   3   0 5310.85 75.7420   1
   1   3   1 11077.4 120.753   6
  -1  -3  -1 11021.1 119.279   6
  -1  -3  -1 11416.0 128.862   5
   1   3   1 11270.7 120.026   1
  -1  -3  -1 11146.3 120.381   1
  -1  -3  -1 10870.2 89.0882   2
   1   3   1 10880.8 126.514   5
  -1  -3  -2 3402.74 45.9016   2
  -1  -3  -2 3525.65 75.3599   6
   1   3   2 3476.30 46.3354   2
  -1  -3  -2 3563.89 76.7239   1
   1   3   2 3446.10 74.9158   6
   1   3   2 3380.47 73.9651   1
  -1  -3  -2 3542.11 77.0467   5
   1   3   3 6818.17 62.1056   2
  -1  -3  -3 6927.08 113.174   6
   1   3   3 6992.30 112.223   1
  -1  -3  -3 6906.07 114.209   1
  -1  -3  -3 6742.76 62.4077   4
  -1  -3  -3 6903.51 63.0013   2
   1   3   3 6843.85 113.268   6
  -1  -3  -4 2623.93 39.3828   4
  -1  -3  -4 2594.63 39.4886   2
   1   3   4 2698.93 77.4278   6
  -1  -3  -4 2696.60 77.9851   1
   1   3   4 2601.35 39.7518   2
   1   3   5 13052.1 179.217   6
  -1  -3  -5 13141.7 178.345   1
   1   3   5 12720.2 93.4547   2
   1   3   5 12520.4 94.1548   4
  -1  -3  -5 12782.2 95.0989   4
   1   3   6 950.524 55.5869   6
   1   3   6 981.935 29.0082   2
  -1  -3  -6 678.816 42.5823   1
  -1  -3  -6 973.067 29.9251   4
   1   3   6 969.265 29.0877   4
  -1  -3  -7 1118.99 62.4205   1
   1   3   7 1170.77 35.1067   2
   1   3   7 1104.99 61.9316   6
  -1  -3  -7 1199.93 36.2371   4
   1   3   7 1126.03 34.6133   4
   1   3   8 4183.14 121.480   6
  -1  -3  -8 4062.92 72.2119   4
  -1  -3  -8 3848.46 122.897   1
   1   3   8 3881.36 68.3935   2
   1   3   8 3891.22 68.7105   4
   1   3   9 2581.90 60.8321   2
   1   3   9 2780.15 104.117   6
  -1  -3  -9 2804.71 64.5242   4
  -1  -3  -9 2560.77 101.581   1
   1   3   9 2580.70 60.8397   4
  -1  -3 -10 1144.65 44.5476   4
  -1  -3 -10 1096.97 71.4692   1
   1   3  10 1040.19 41.7956   2
   1   3  10 1033.75 42.8372   4
   1   3  10 1109.89 71.7348   6
   1   3  11 39.0989 16.3465   2
  -1  -3 -11 28.2637 15.9941   4
   1   3  11 25.8942 25.5758   6
  -1  -3 -12 2136.33 105.133   1
   1   3  12 1972.44 100.777   6
   1   3  13 1031.56 78.8025   6
  -1  -3 -13 1120.09 87.2946   1
   1   3  14 235.796 46.6973   6
  -1  -3 -14 468.091 68.0595   1
   1   3  15 440.866 60.6544   6
  -1  -3 -15 432.666 64.7752   1
  -1  -3 -16 450.577 68.7992   1
   1   3  16 313.105 53.2919   6
  -1  -3 -17 123.355 59.3059   1
   1   3  17 64.5829 35.4371   6
  -1  -3 -18 428.663 99.4154   1
   1   3  18 34.7834 37.4493   6
  -1  -4  20 95.0504 44.5229   3
   1   4 -20 100.027 41.8883   5
   1   4 -19 224.276 50.6828   5
  -1  -4  19 80.1338 42.0938   3
   1   4 -18 263.449 50.8352   5
  -1  -4  18 270.118 50.1831   3
   1   4 -17 46.5680 32.2793   5
  -1  -4  17 48.9569 30.5985   3
  -1  -4  16 1619.94 96.9250   3
  -1  -4  16 1681.60 83.1628   6
   1   4 -16 1666.28 95.8946   5
  -1  -4  15 747.291 52.9598   6
  -1  -4  15 735.207 66.7639   3
   1   4 -15 737.676 63.4368   5
  -1  -4  14 42.1075 27.3697   3
   1   4 -14 0.59763 23.9843   5
  -1  -4  14 26.9479 20.1664   6
  -1  -4  13 97.0856 26.8626   6
  -1  -4  13 77.0143 30.2990   3
   1   4 -13 24.6577 22.8361   5
  -1  -4  12 96.0157 28.8462   3
   1   4 -12 96.1998 28.1972   5
  -1  -4  12 103.797 23.2137   6
  -1  -4  11 343.026 41.0653   3
   1   4 -11 338.439 39.7071   5
  -1  -4  10 109.201 27.4637   3
  -1  -4  10 156.922 24.2946   1
   1   4 -10 138.705 28.2491   5
  -1  -4   9 191.133 23.2443   1
   1   4  -9 141.843 27.1157   5
  -1  -4   9 152.925 30.5354   3
   1   4  -8 515.365 42.2333   5
  -1  -4   8 621.447 44.6507   3
  -1  -4   8 499.383 25.8932   1
  -1  -4   7 538.389 27.4679   1
   1   4  -7 510.267 38.1556   5
  -1  -4   7 494.421 40.1922   3
   1   4  -6 2535.39 75.5673   5
  -1  -4   6 2618.65 76.8269   3
  -1  -4   6 2539.25 50.4493   1
  -1  -4   5 1597.39 37.8013   6
   1   4  -5 1478.95 57.6073   5
  -1  -4   5 1343.85 57.1407   3
   1   4  -4 71.2380 19.2168   3
  -1  -4   4 73.9831 12.3324   6
  -1  -4   4 77.6542 22.0975   4
  -1  -4   4 69.4201 21.0393   5
   1   4  -4 53.6997 19.4204   5
  -1  -4   4 80.5171 23.8225   3
  -1  -4   3 110.950 14.8856   6
  -1  -4   3 77.4134 21.4902   5
   1   4  -3 63.8754 13.8447   6
  -1  -4   3 172.801 24.8518   4
   1   4  -3 61.5422 22.6041   5
  -1  -4   3 90.2538 22.8029   3
   1   4  -2 4937.33 72.0745   6
  -1  -4   2 5425.00 91.7350   4
  -1  -4   2 5415.19 72.9894   6
   1   4  -2 5020.12 95.2763   5
  -1  -4   2 5211.93 72.5497   1
  -1  -4   2 5121.19 97.3781   5
  -1  -4   1 646.391 36.7562   5
  -1  -4   1 619.739 27.5282   6
   1   4  -1 657.975 29.9699   1
   1   4  -1 623.311 30.8728   6
  -1  -4   1 583.444 27.2332   1
   1   4  -1 647.234 38.4303   5
   1   4   0 9041.45 110.448   1
  -1  -4   0 8797.58 109.350   6
  -1  -4   0 8965.21 109.310   1
   1   4   0 8692.28 109.247   6
   1   4   0 8405.89 121.950   5
  -1  -4   0 8585.79 124.616   5
  -1  -4  -1 1627.02 57.4816   5
  -1  -4  -1 1569.66 50.2983   6
   1   4   1 1591.39 57.3934   5
  -1  -4  -1 1549.59 37.9505   2
   1   4   1 1473.77 51.3996   6
   1   4   1 1551.59 52.2326   1
  -1  -4  -1 1595.48 51.0721   1
   1   4   2 12.1398 17.4448   6
  -1  -4  -2 19.4290 8.69680   2
  -1  -4  -2-14.7460 17.2965   6
   1   4   2 3.94346 17.3646   1
  -1  -4  -2-4.70258 16.0715   5
  -1  -4  -2 27.1989 20.6876   1
  -1  -4  -3 127.434 12.9776   2
  -1  -4  -3 43.0213 9.72650   4
  -1  -4  -3 96.6306 25.2083   1
   1   4   3 70.2696 21.8384   6
  -1  -4  -4 614.156 19.5622   4
  -1  -4  -4 822.237 49.6555   1
   1   4   4 701.751 20.4408   2
   1   4   4 779.158 47.8880   6
  -1  -4  -4 580.200 18.6141   2
   1   4   5 25.9007 20.9147   6
   1   4   5 48.5781 7.84415   2
  -1  -4  -5 33.2007 7.51769   4
   1   4   6 14.4503 20.4406   6
  -1  -4  -6 31.6283 7.98646   4
   1   4   6 34.8690 7.42385   2
  -1  -4  -6 2.73991 23.2014   1
  -1  -4  -7 60.2053 23.5417   1
   1   4   7 64.8576 9.75711   2
   1   4   7 65.7909 25.6377   6
  -1  -4  -7 63.4498 9.79597   4
  -1  -4  -8 4.94277 22.8020   1
   1   4   8 22.7753 8.35501   2
  -1  -4  -8 23.8307 9.31115   4
   1   4   8-5.30644 23.5121   6
   1   4   8 14.6758 7.79651   4
  -1  -4  -9 459.770 24.0152   4
   1   4   9 435.128 22.4042   2
   1   4   9 457.558 48.2351   6
   1   4   9 447.724 22.9213   4
  -1  -4  -9 474.895 54.0577   1
   1   4  10 1016.46 70.5064   6
  -1  -4 -10 1174.52 75.3096   1
   1   4  10 1015.86 35.5201   2
   1   4  11 1013.64 73.7254   6
  -1  -4 -11 992.035 73.7747   1
   1   4  12-4.22399 29.7457   6
  -1  -4 -12 74.1003 38.9956   1
   1   4  13 1060.18 82.5804   6
  -1  -4 -13 2058.28 116.371   1
   1   4  14 322.960 56.1718   6
  -1  -4 -14 452.374 63.0816   1
  -1  -4 -15 202.423 54.5330   1
   1   4  15 82.9746 42.3744   6
   1   4  16 43.5568 36.5439   6
  -1  -4 -16 190.913 66.4385   1
   1   4  17 33.5052 34.0925   6
  -1  -4 -17 62.1483 65.8413   1
   1   5 -20 51.5991 42.0044   5
  -1  -5  20-7.58442 41.4290   3
   1   5 -19 74.1189 33.9790   5
  -1  -5  19 72.9098 37.9481   3
  -1  -5  18 31.4574 35.1477   3
   1   5 -18 120.411 40.4942   5
   1   5 -17 561.370 63.4050   5
  -1  -5  17 488.006 62.0246   3
  -1  -5  16-17.6540 27.4509   3
   1   5 -16-0.44565 25.7169   5
  -1  -5  15 61.1598 31.2290   3
  -1  -5  15 78.1249 25.5724   6
   1   5 -15 84.1975 33.4615   5
   1   5 -14 1323.60 80.8357   5
  -1  -5  14 1212.66 63.1031   6
  -1  -5  14 1207.03 78.1621   3
  -1  -5  13 495.308 39.5704   6
   1   5 -13 505.459 50.5403   5
  -1  -5  13 450.599 49.3386   3
   1   5 -12-10.8048 20.3121   5
  -1  -5  12 5.27919 22.9248   3
  -1  -5  11 418.819 45.9313   3
   1   5 -11 425.095 43.7528   5
  -1  -5  10 4302.07 89.6357   1
   1   5 -10 4282.15 120.164   5
  -1  -5  10 4352.13 119.910   3
  -1  -5   9 250.877 36.6565   3
  -1  -5   9 217.273 21.3093   1
   1   5  -9 185.616 30.4612   5
  -1  -5   8 2971.66 65.2361   1
  -1  -5   8 2888.43 92.5288   3
   1   5  -8 2968.00 93.4956   5
  -1  -5   7 1427.53 42.2328   1
  -1  -5   7 1447.54 43.7880   6
   1   5  -7 1317.88 61.6585   5
  -1  -5   7 1415.58 62.1583   3
  -1  -5   6 6622.02 130.216   3
  -1  -5   6 6969.31 88.5405   6
   1   5  -6 6977.66 129.778   5
  -1  -5   5 1717.75 44.4370   6
   1   5  -5 1707.41 66.4624   5
  -1  -5   5 1907.14 67.6117   3
   1   5  -4 540.412 27.4057   6
   1   5  -4 616.794 40.8178   5
  -1  -5   4 514.198 39.1797   3
  -1  -5   4 550.443 26.3569   6
  -1  -5   3 2376.47 69.6652   4
  -1  -5   3 2216.84 53.0740   1
   1   5  -3 2245.67 53.2542   6
  -1  -5   3 2440.48 54.5471   6
  -1  -5   3 2281.85 70.8878   3
   1   5  -3 2193.90 69.7462   5
  -1  -5   2 3589.83 68.8330   6
  -1  -5   2 3403.28 67.5846   1
   1   5  -2 3393.86 68.6814   6
  -1  -5   2 3704.17 79.9090   4
   1   5  -2 3519.05 86.1826   5
   1   5  -1 1918.24 65.3318   5
  -1  -5   1 1881.63 53.3434   1
   1   5  -1 1918.78 55.2492   6
  -1  -5   1 1919.79 53.5605   6
  -1  -5   1 1979.18 55.2218   4
   1   5   0 1898.68 58.9278   6
  -1  -5   0 1862.06 48.9251   4
   1   5   0 1852.33 58.5001   1
   1   5   0 1853.69 66.3532   5
  -1  -5   0 1861.65 56.8311   6
  -1  -5   0 1974.23 57.8083   1
  -1  -5  -1 4945.70 96.5124   1
   1   5   1 4941.32 107.336   5
   1   5   1 5041.65 99.4458   1
  -1  -5  -1 4953.79 97.2414   6
   1   5   1 4899.39 98.0598   6
   1   5   2 7848.34 132.151   6
  -1  -5  -2 7791.81 82.7214   2
  -1  -5  -2 7957.33 131.230   1
  -1  -5  -3 10870.9 87.1396   2
  -1  -5  -3 11489.1 166.784   1
   1   5   3 11206.1 166.525   6
  -1  -5  -4 6309.10 57.9780   2
  -1  -5  -4 7418.16 141.484   1
   1   5   4 7181.89 140.863   6
  -1  -5  -5 1954.62 78.4586   1
   1   5   5 1876.39 76.6224   6
  -1  -5  -6-14.0905 26.8506   1
   1   5   6-5.46473 21.6641   6
   1   5   7 893.924 59.6925   6
  -1  -5  -7 888.811 60.4277   1
   1   5   8 3.70681 3.61324   2
   1   5   8-5.11367 22.6384   6
  -1  -5  -8-23.5236 28.2231   1
   1   5   9 290.073 41.2219   6
  -1  -5  -9 318.945 44.2102   1
   1   5   9 174.957 11.4624   2
   1   5  10 58.1931 29.0104   6
  -1  -5 -10 49.0727 38.0037   1
  -1  -5 -11-0.34520 33.5024   1
   1   5  11-14.9869 26.5002   6
   1   5  12 2304.66 114.620   6
  -1  -5 -12 2194.70 113.117   1
   1   5  13 1228.95 88.4807   6
  -1  -5 -13 1352.77 95.2273   1
   1   5  14 1197.68 92.8954   6
  -1  -5 -14 1173.73 91.4994   1
   1   5  15 1101.77 92.0411   6
  -1  -5 -15 1273.36 100.746   1
   1   5  16 61.0365 38.5163   6
  -1  -5 -16 174.587 65.1881   1
   1   6 -20 55.9261 40.1116   5
  -1  -6  20 60.4497 41.4381   3
  -1  -6  19 65.3258 41.6915   3
   1   6 -19 24.2320 34.3899   5
   1   6 -18 52.7535 38.7209   5
  -1  -6  18 61.3672 40.7178   3
   1   6 -17 9.55637 30.1608   5
  -1  -6  17-1.95926 34.4879   3
  -1  -6  16 23.7593 31.3879   3
   1   6 -16 65.3869 30.5216   5
   1   6 -15 1353.93 86.5907   5
  -1  -6  15 1338.83 85.3554   3
  -1  -6  14 2275.18 81.4716   6
   1   6 -14 2201.79 103.091   5
  -1  -6  14 2218.59 102.646   3
   1   6 -13 614.432 55.0827   5
  -1  -6  13 573.425 55.3206   3
  -1  -6  12 98.1216 31.7795   3
   1   6 -12 76.1788 28.2325   5
  -1  -6  11 156.820 31.3094   3
   1   6 -11 152.374 31.3300   5
  -1  -6  10 353.341 40.9919   3
   1   6 -10 307.359 36.4894   5
  -1  -6  10 384.095 29.8185   1
  -1  -6   9 582.441 31.7862   1
  -1  -6   9 575.293 49.4158   3
   1   6  -9 653.010 49.4340   5
  -1  -6   9 627.040 35.0879   6
  -1  -6   8 162.252 18.9821   1
   1   6  -8 176.949 32.1270   5
  -1  -6   8 181.200 21.0559   6
  -1  -6   8 172.030 31.3164   3
  -1  -6   7 39.6108 28.1740   3
   1   6  -7 134.729 34.2234   5
  -1  -6   7 117.759 21.2562   6
   1   6  -6 34.3920 18.5380   5
  -1  -6   6 77.9217 24.7751   3
  -1  -6   6 28.1811 13.5479   6
  -1  -6   5 1016.31 38.4865   6
   1   6  -5 971.246 54.0684   5
  -1  -6   5 1020.39 53.7756   3
   1   6  -4 390.704 26.4001   6
  -1  -6   4 355.647 34.0234   3
   1   6  -4 390.798 37.5128   5
  -1  -6   4 377.018 26.2691   6
  -1  -6   3 881.109 39.5702   6
  -1  -6   3 723.576 45.1389   3
   1   6  -3 749.254 36.1633   6
   1   6  -3 742.164 45.9987   5
  -1  -6   3 805.403 38.7170   1
   1   6  -2 5011.34 93.3960   6
  -1  -6   2 5403.45 103.334   4
  -1  -6   2 5156.17 91.5052   1
   1   6  -2 5058.53 113.220   5
  -1  -6   2 5174.38 92.0619   6
   1   6  -1 176.547 32.7505   5
  -1  -6   1 224.590 23.9469   1
  -1  -6   1 312.881 29.9344   4
  -1  -6   1 229.203 25.6909   6
   1   6  -1 173.843 28.8856   6
  -1  -6   0 515.385 29.0823   4
  -1  -6   0 474.592 34.5850   1
   1   6   0 480.695 35.7354   6
   1   6   0 405.160 36.7617   5
  -1  -6  -1 122.624 16.8674   4
   1   6   1 103.839 23.3755   6
  -1  -6  -1 53.8684 15.2663   1
  -1  -6  -2 143.567 24.0883   1
  -1  -6  -2 149.876 16.5874   4
   1   6   2 115.859 26.8548   6
  -1  -6  -2 132.050 13.9192   2
   1   6   3 699.464 47.1438   6
  -1  -6  -3 719.153 47.4818   1
  -1  -6  -3 692.665 24.7243   4
  -1  -6  -3 532.329 20.2705   2
  -1  -6  -4 3678.60 45.9867   2
  -1  -6  -4 4407.38 115.228   1
  -1  -6  -4 3697.21 46.0583   4
  -1  -6  -4 3543.21 47.7204   4
   1   6   4 4352.25 116.264   6
   1   6   5 1315.30 68.5802   6
  -1  -6  -5 1342.10 69.3001   1
   1   6   6 689.433 53.0504   6
  -1  -6  -6 629.511 51.5931   1
   1   6   7 2.28234 24.2858   6
  -1  -6  -7 3.94417 23.1736   1
  -1  -6  -8 80.4351 32.8100   1
   1   6   8 67.3368 27.6732   6
  -1  -6  -9 329.343 47.9363   1
   1   6   9 359.854 47.1990   6
   1   6  10 63.2310 34.2602   6
  -1  -6 -10 29.1754 33.3751   1
  -1  -6 -11 578.121 64.8705   1
   1   6  11 553.502 60.4790   6
   1   6  12 139.623 42.2589   6
  -1  -6 -12 173.294 49.7249   1
   1   6  13 51.6389 34.9731   6
  -1  -6 -13 70.7663 38.2962   1
   1   6  14 158.589 44.7332   6
  -1  -6 -14 197.584 56.8429   1
  -1  -6 -15 555.390 95.0674   1
   1   6  15 303.271 54.5890   6
   1   6  16 727.294 82.1290   6
  -1  -7  20 203.240 51.6706   3
   1   7 -20 160.556 50.5675   5
   1   7 -19 285.575 54.4389   5
  -1  -7  19 353.846 62.5310   3
  -1  -7  18 350.447 59.7097   3
   1   7 -18 356.090 56.7213   5
  -1  -7  17 141.609 40.1987   3
   1   7 -17 181.239 42.9058   5
  -1  -7  16-44.5420 32.3277   3
   1   7 -16-13.2910 28.4701   5
   1   7 -15 248.178 44.5252   5
  -1  -7  15 176.541 40.1548   3
  -1  -7  14 279.326 44.4576   3
   1   7 -14 311.706 46.8950   5
  -1  -7  13 2431.90 106.536   3
   1   7 -13 2346.78 104.961   5
   1   7 -12 208.226 40.7247   5
  -1  -7  12 134.199 33.9416   3
  -1  -7  11 331.181 46.7563   3
   1   7 -11 297.870 39.5517   5
   1   7 -10 2885.73 105.039   5
  -1  -7  10 2943.40 103.849   3
  -1  -7  10 2830.99 76.2336   6
  -1  -7   9 439.562 29.2764   1
  -1  -7   9 434.288 30.2506   6
   1   7  -9 469.997 44.8234   5
  -1  -7   9 464.658 45.2082   3
   1   7  -8 32.0091 22.4403   5
  -1  -7   8 28.6923 12.9061   6
  -1  -7   8 35.5119 21.7236   3
  -1  -7   7 288.459 36.3953   3
   1   7  -7 427.795 42.5393   5
  -1  -7   7 390.109 27.0884   6
  -1  -7   6 1246.58 46.0999   6
  -1  -7   6 1394.39 66.1476   3
   1   7  -6 1294.69 65.1901   5
  -1  -7   5 4553.21 116.024   3
  -1  -7   5 4709.78 88.4964   6
   1   7  -5 4541.20 89.2329   6
   1   7  -5 4772.21 120.521   5
   1   7  -4 1588.05 69.6205   5
  -1  -7   4 1637.00 56.6711   1
  -1  -7   4 1778.14 56.6715   6
   1   7  -4 1508.03 54.1061   6
  -1  -7   4 1496.03 69.1925   3
  -1  -7   3 8025.83 122.618   1
   1   7  -3 7841.68 123.579   6
   1   7  -3 7853.47 151.294   5
  -1  -7   3 8365.48 123.450   6
   1   7  -2 10333.1 172.008   5
   1   7  -2 10277.3 146.324   6
  -1  -7   2 10556.1 145.174   1
  -1  -7   1 1157.33 54.2543   4
   1   7  -1 772.579 47.1905   6
   1   7  -1 802.188 52.5319   5
  -1  -7   1 915.593 52.5064   1
  -1  -7   0 2009.78 61.1730   4
  -1  -7   0 1891.95 69.6151   1
   1   7   0 1719.59 67.2557   6
   1   7   0 1689.00 72.7173   5
  -1  -7  -1 551.750 39.4532   1
   1   7   1 493.875 41.3505   6
  -1  -7  -1 582.753 31.7133   4
  -1  -7  -2 1554.24 68.2386   1
   1   7   2 1302.75 65.1752   6
  -1  -7  -2 1494.44 44.0087   4
  -1  -7  -2 1328.03 41.3160   2
  -1  -7  -3 84.8075 10.8878   2
  -1  -7  -3 109.819 14.2444   4
  -1  -7  -3 144.836 31.2271   1
   1   7   3 66.4511 23.7008   6
  -1  -7  -4 60.0129 9.75211   2
  -1  -7  -4 16.6747 6.50240   4
  -1  -7  -4 32.5503 7.26922   4
   1   7   4 20.9501 18.7080   6
  -1  -7  -4 56.0715 25.8764   1
  -1  -7  -5 505.788 49.5825   1
   1   7   5 517.282 47.7695   6
  -1  -7  -6-1.38093 26.9985   1
   1   7   6-2.24449 23.2430   6
  -1  -7  -7 288.133 47.6912   1
   1   7   7 255.858 42.8761   6
   1   7   8 924.314 70.5958   6
  -1  -7  -8 847.662 67.8093   1
   1   7   9 3546.89 135.304   6
  -1  -7  -9 3520.05 136.363   1
  -1  -7 -10 1277.63 88.0689   1
   1   7  10 1296.03 89.2083   6
  -1  -7 -11 65.8576 41.5950   1
   1   7  11 11.4834 28.6720   6
  -1  -7 -12 136.827 46.2163   1
   1   7  12 187.667 44.5233   6
  -1  -7 -13 39.3836 40.5158   1
   1   7  13 8.42813 32.0532   6
   1   7  14-9.80900 34.0357   6
  -1  -7 -14 66.6168 53.6392   1
  -1  -7 -15 139.813 57.4110   1
   1   7  15 28.5197 38.0514   6
  -1  -8  20 125.721 48.4323   3
   1   8 -20 79.4875 39.4445   5
   1   8 -19 109.650 42.6837   5
  -1  -8  19 3.11517 42.2960   3
   1   8 -18 464.483 58.8782   5
  -1  -8  18 214.732 49.3891   3
   1   8 -17-24.0714 28.2354   5
  -1  -8  17 12.8321 35.9063   3
  -1  -8  16 70.7573 33.5088   3
   1   8 -16 96.4916 38.1743   5
  -1  -8  15 306.990 47.3993   3
   1   8 -15 265.478 45.2772   5
   1   8 -14 80.4521 31.2993   5
  -1  -8  14 78.7698 32.3040   3
  -1  -8  13 257.722 42.2532   3
   1   8 -13 213.127 37.3383   5
   1   8 -12 669.806 58.2324   5
  -1  -8  12 649.938 60.9125   3
  -1  -8  11 12.2274 23.6260   3
   1   8 -11 0.55861 24.4273   5
  -1  -8  10 361.710 44.0255   3
   1   8 -10 360.935 44.2755   5
  -1  -8   9 47.0759 16.9689   6
   1   8  -9 17.1059 21.3505   5
  -1  -8   9 32.1908 20.5680   3
   1   8  -8 534.524 50.5683   5
  -1  -8   8 493.768 33.0120   6
  -1  -8   8 389.459 42.0951   3
  -1  -8   7 787.195 55.8778   3
  -1  -8   7 717.917 39.1060   6
   1   8  -7 739.980 56.0630   5
  -1  -8   6 2272.54 66.8797   6
  -1  -8   6 2260.71 88.0314   3
   1   8  -6 2231.12 88.9615   5
  -1  -8   5 2348.64 68.5097   1
   1   8  -5 2273.42 69.2648   6
  -1  -8   5 2269.05 87.9546   3
   1   8  -5 2383.92 90.3428   5
  -1  -8   4 357.149 32.5211   1
   1   8  -4 290.410 29.1002   6
   1   8  -4 316.193 40.8552   5
  -1  -8   4 275.165 37.6665   3
   1   8  -3 2334.00 88.7299   5
  -1  -8   3 2401.81 72.8431   1
   1   8  -3 2321.96 74.9256   6
   1   8  -2 429.293 42.0922   5
  -1  -8   2 392.036 32.6435   1
   1   8  -2 403.799 34.9689   6
  -1  -8   1 185.020 26.0189   1
   1   8  -1 239.380 35.6372   5
   1   8  -1 202.564 28.6416   6
  -1  -8   0 77.2984 18.4326   4
   1   8   0 57.0252 21.4879   6
   1   8   0 18.5151 18.7014   5
  -1  -8   0 46.0477 15.6355   1
  -1  -8  -1 11.3122 18.6660   1
  -1  -8  -1 32.4523 15.5723   4
   1   8   1 46.4110 24.1091   6
  -1  -8  -2 58.2842 13.9818   4
  -1  -8  -2 42.6578 20.9844   1
  -1  -8  -2 42.5808 11.7215   2
   1   8   2 42.6241 22.8466   6
  -1  -8  -3 1713.89 44.3242   2
   1   8   3 1748.56 79.9978   6
  -1  -8  -3 1820.88 45.8042   4
  -1  -8  -3 1866.79 82.1821   1
   1   8   4 571.339 51.2986   6
  -1  -8  -4 499.904 20.2188   4
  -1  -8  -4 525.223 21.1160   2
  -1  -8  -4 565.886 50.5626   1
  -1  -8  -5 11.5485 23.6196   1
   1   8   5-19.0027 21.4760   6
  -1  -8  -6 83.0417 32.5613   1
   1   8   6 75.3556 30.8575   6
  -1  -8  -7 2319.46 107.045   1
   1   8   7 2398.07 108.824   6
   1   8   8 1417.58 88.5335   6
  -1  -8  -8 1379.99 87.7613   1
  -1  -8  -9-15.6321 38.1214   1
   1   8   9-24.8179 31.1670   6
   1   8  10 6.78389 28.0979   6
  -1  -8 -10-59.8134 47.2880   1
   1   8  11 705.089 72.8002   6
  -1  -8 -11 576.305 68.5359   1
   1   8  12 602.799 72.3956   6
  -1  -8 -12 519.775 71.5657   1
   1   8  13 259.381 54.3058   6
  -1  -8 -13 199.904 56.7975   1
  -1  -8 -14 108.911 51.9113   1
   1   8  14 64.1509 42.7351   6
  -1  -9  19 777.719 78.5917   3
   1   9 -19 772.355 82.0902   5
  -1  -9  18 1293.81 97.5666   3
   1   9 -18 1284.69 97.3732   5
  -1  -9  17 65.4964 37.4829   3
   1   9 -17 193.680 46.6046   5
  -1  -9  16 181.756 45.4974   3
   1   9 -16 230.273 46.0858   5
  -1  -9  15 431.817 56.9201   3
   1   9 -15 351.741 50.6543   5
   1   9 -14 217.860 42.4020   5
  -1  -9  14 231.973 43.8905   3
   1   9 -13 1115.30 79.8801   5
  -1  -9  13 1209.91 82.0350   3
  -1  -9  12 575.852 59.2202   3
   1   9 -12 494.017 54.3116   5
   1   9 -11 133.180 32.5230   5
  -1  -9  11 129.976 35.9505   3
   1   9 -10 5112.15 149.466   5
  -1  -9  10 4994.57 147.822   3
  -1  -9   9 72.4964 26.3848   3
   1   9  -9 109.520 29.9995   5
  -1  -9   8 331.950 42.3272   3
   1   9  -8 417.945 46.8487   5
   1   9  -7 284.300 39.1044   5
  -1  -9   7 294.911 40.1850   3
  -1  -9   6 618.826 39.8787   1
  -1  -9   6 639.203 54.7809   3
   1   9  -6 654.047 52.9921   5
   1   9  -5 775.175 46.0492   6
   1   9  -5 789.796 58.0998   5
  -1  -9   5 733.776 55.0407   3
  -1  -9   5 820.200 46.7619   1
  -1  -9   4 123.951 22.0835   1
   1   9  -4 70.4784 20.0675   6
  -1  -9   4 96.2240 26.2787   3
   1   9  -4 131.991 29.4699   5
  -1  -9   3 116.149 22.6773   1
   1   9  -3 86.6926 24.7372   6
   1   9  -3 93.6019 32.0108   5
   1   9  -2 1530.36 67.3451   6
  -1  -9   2 1549.49 65.4228   1
   1   9  -2 1568.02 77.6963   5
   1   9  -1 174.446 30.3002   6
   1   9  -1 163.261 31.9547   5
  -1  -9   1 173.038 26.2110   1
   1   9   0 1459.25 71.3736   6
   1   9   0 1410.44 75.7874   5
  -1  -9   0 1338.89 65.4880   1
  -1  -9  -1 1871.51 79.2402   1
  -1  -9  -1 1967.04 62.3689   4
   1   9   1 2071.14 86.2819   6
  -1  -9  -2 1348.50 70.7909   1
  -1  -9  -2 1302.40 46.1468   2
   1   9   2 1358.71 73.7418   6
  -1  -9  -2 1435.44 48.5820   4
   1   9   3 577.248 53.0485   6
  -1  -9  -3 578.056 27.9487   4
  -1  -9  -3 540.110 27.1332   2
  -1  -9  -3 563.385 50.2840   1
  -1  -9  -4 311.357 41.4849   1
  -1  -9  -4 255.307 16.3184   4
   1   9   4 285.552 40.3293   6
  -1  -9  -4 250.023 16.3930   2
   1   9   5 625.110 58.5485   6
  -1  -9  -5 648.135 59.1664   1
  -1  -9  -6 785.921 65.6488   1
   1   9   6 739.378 64.0744   6
   1   9   7 103.929 33.4231   6
  -1  -9  -7 77.2162 37.2697   1
   1   9   8 96.7402 34.0653   6
  -1  -9  -8 9.45988 35.3147   1
  -1  -9  -9 101.385 37.2925   1
   1   9   9 198.201 44.3837   6
   1   9  10 11.5482 33.7772   6
  -1  -9 -10-63.8050 42.1216   1
   1   9  11 126.784 46.7295   6
  -1  -9 -11 110.099 44.4708   1
   1   9  12 29.3558 35.8578   6
  -1  -9 -12-40.0549 47.5853   1
   1   9  13 43.9060 39.8048   6
  -1  -9 -13 30.9543 45.0475   1
  -1 -10  19 77.1019 42.3434   3
   1  10 -18 6.29560 35.4029   5
  -1 -10  18-43.8362 42.4236   3
  -1 -10  17 57.2288 37.6022   3
   1  10 -17 76.1440 36.1888   5
  -1 -10  16 1182.49 92.9050   3
   1  10 -16 1132.34 89.8636   5
   1  10 -15 1108.08 85.4151   5
  -1 -10  15 1174.12 86.4815   3
  -1 -10  14 315.095 49.1259   3
   1  10 -14 333.621 48.3946   5
   1  10 -13 31.9762 28.3088   5
  -1 -10  13 54.7828 37.5104   3
   1  10 -12 135.046 37.5851   5
  -1 -10  12 133.647 36.3413   3
  -1 -10  11-21.1874 27.4362   3
   1  10 -11-19.0583 26.8522   5
  -1 -10  10-12.3631 28.3385   3
   1  10 -10 17.1705 24.9798   5
   1  10  -9 1847.62 94.2999   5
  -1 -10   9 1750.10 90.8240   3
   1  10  -8 1667.24 88.8266   5
  -1 -10   8 1651.57 89.3459   3
  -1 -10   7 1578.68 66.2669   1
  -1 -10   7 1628.31 84.8041   3
   1  10  -7 1567.93 84.9851   5
  -1 -10   6 1378.28 61.4544   1
   1  10  -6 1396.13 81.1594   5
   1  10  -6 1297.96 61.6839   6
  -1 -10   6 1295.25 76.1574   3
  -1 -10   5 2040.53 94.1932   3
   1  10  -5 1990.34 93.1626   5
  -1 -10   5 2066.44 76.0019   1
   1  10  -5 1921.18 75.3751   6
   1  10  -4 2340.17 100.549   5
   1  10  -4 2363.56 82.9018   6
  -1 -10   4 2397.35 81.1458   1
  -1 -10   4 2203.92 97.1424   3
   1  10  -3 24.1356 22.1257   5
   1  10  -3-11.1807 18.5723   6
  -1 -10   3-3.82374 16.0770   1
  -1 -10   2 46.5920 18.8117   1
   1  10  -2 84.0225 28.7223   5
   1  10  -2 54.7225 22.8588   6
  -1 -10   1 311.307 34.2103   1
   1  10  -1 365.298 41.3988   6
   1  10  -1 335.501 46.1523   5
  -1 -10   0 1396.99 69.6501   1
   1  10   0 1411.09 73.5852   6
  -1 -10  -1 3.00557 20.5310   1
   1  10   1 43.1043 27.3243   6
  -1 -10  -2 1904.94 88.2755   1
  -1 -10  -2 1737.75 56.6369   2
   1  10   2 1893.65 91.4015   6
   1  10   3 8139.02 188.917   6
  -1 -10  -3 8245.99 186.919   1
   1  10   4 302.302 45.6833   6
  -1 -10  -4 344.631 45.7176   1
  -1 -10  -5 158.109 43.8717   1
   1  10   5 124.585 32.9725   6
  -1 -10  -6 368.712 51.7159   1
   1  10   6 433.550 53.5172   6
   1  10   7 672.262 65.7342   6
  -1 -10  -7 710.284 68.2500   1
  -1 -10  -8 614.850 64.6496   1
   1  10   8 681.804 69.9092   6
   1  10   9 32.5636 30.6980   6
  -1 -10  -9 12.5035 35.4510   1
  -1 -10 -10 257.167 55.2182   1
   1  10  10 236.116 51.7705   6
  -1 -10 -11 146.153 43.2227   1
   1  10  11 243.657 52.9855   6
  -1 -10 -12 233.619 62.8336   1
   1  10  12 231.580 53.8408   6
   1  11 -18 504.810 69.7791   5
  -1 -11  18 548.803 70.3706   3
  -1 -11  17 464.393 64.4432   3
   1  11 -17 564.627 68.1488   5
   1  11 -16 934.098 82.9460   5
  -1 -11  16 805.387 76.7002   3
   1  11 -15 234.803 47.4280   5
  -1 -11  15 189.902 43.5881   3
  -1 -11  14 203.748 47.4031   3
   1  11 -14 173.567 43.0775   5
  -1 -11  13 185.028 42.6819   3
   1  11 -13 191.969 43.3624   5
  -1 -11  12 363.906 51.8415   3
   1  11 -12 327.242 50.2280   5
  -1 -11  11 305.535 55.1648   3
   1  11 -11 245.160 43.1466   5
  -1 -11  10 580.826 58.6494   3
   1  11 -10 659.497 63.6512   5
   1  11  -9 380.127 47.6855   5
  -1 -11   9 269.216 40.5908   3
  -1 -11   8 922.847 52.1465   1
  -1 -11   8 904.844 71.0689   3
   1  11  -8 824.319 65.8490   5
   1  11  -7 514.876 53.3677   5
  -1 -11   7 461.340 53.3824   3
  -1 -11   7 516.482 42.0435   1
  -1 -11   6 1022.26 57.0533   1
  -1 -11   6 968.230 70.7958   3
   1  11  -6 1002.62 57.3096   6
   1  11  -6 943.796 70.5946   5
   1  11  -5 2592.77 91.1887   6
  -1 -11   5 2564.70 107.162   3
   1  11  -5 2516.51 107.462   5
  -1 -11   5 2653.40 90.6762   1
   1  11  -4 663.217 51.5418   6
  -1 -11   4 803.429 52.9516   1
   1  11  -4 694.034 62.2082   5
  -1 -11   4 752.587 62.2725   3
   1  11  -3 3464.12 111.614   6
   1  11  -3 3461.00 126.669   5
  -1 -11   3 3558.77 107.785   1
   1  11  -2 1797.60 84.5200   6
   1  11  -2 1716.84 93.3055   5
  -1 -11   2 1776.08 80.1922   1
   1  11  -1 451.246 47.3891   6
  -1 -11   1 435.917 43.9406   1
   1  11  -1 493.676 54.3542   5
  -1 -11   0 488.860 45.8352   1
   1  11   0 551.729 52.8392   6
   1  11   1 33.7361 27.4301   6
  -1 -11  -1 24.7935 21.4673   1
   1  11   2 763.974 63.3318   6
  -1 -11  -2 688.058 59.3598   1
   1  11   3 326.129 48.1497   6
  -1 -11  -3 296.602 46.4044   1
   1  11   4 78.1254 31.2297   6
  -1 -11  -4 33.6155 28.3735   1
   1  11   5 167.316 39.5971   6
  -1 -11  -5 178.188 45.0021   1
  -1 -11  -6 176.515 41.9755   1
   1  11   6 180.506 44.8662   6
  -1 -11  -7 473.480 61.5591   1
   1  11   7 421.246 58.7764   6
  -1 -11  -8-3.91926 35.1070   1
   1  11   8 17.8203 32.3683   6
  -1 -11  -9 464.313 65.2304   1
   1  11   9 425.693 62.7316   6
   1  11  10 623.861 74.5350   6
  -1 -11 -10 521.617 69.1058   1
   1  11  11 89.6481 43.4934   6
  -1 -11 -11 26.9817 44.9321   1
   1  12 -17-33.5638 39.6164   5
  -1 -12  17 52.0140 40.5895   3
   1  12 -16 30.2662 36.1619   5
  -1 -12  16 67.6804 35.2065   3
  -1 -12  15 137.764 48.9305   3
   1  12 -15 20.6831 35.4464   5
   1  12 -14 249.642 49.7390   5
  -1 -12  14 418.489 60.7276   3
  -1 -12  13 99.4354 40.2360   3
   1  12 -13 91.1708 39.3601   5
  -1 -12  12 198.211 43.7190   3
   1  12 -12 188.658 42.4360   5
  -1 -12  11 215.577 44.2423   3
   1  12 -11 299.885 48.2654   5
   1  12 -10 1338.23 90.0665   5
  -1 -12  10 1352.61 87.1070   3
  -1 -12   9 884.316 76.1124   3
  -1 -12   9 808.405 53.0243   1
   1  12  -9 853.279 73.0109   5
  -1 -12   8 237.426 32.1646   1
  -1 -12   8 196.817 41.1333   3
   1  12  -8 232.760 42.4270   5
  -1 -12   7 1016.33 60.1590   1
   1  12  -7 1020.82 74.8490   5
  -1 -12   7 959.359 73.3230   3
   1  12  -6 583.798 59.3328   5
  -1 -12   6 431.846 54.1190   3
   1  12  -6 505.865 46.3355   6
  -1 -12   6 497.723 46.1532   1
   1  12  -5 1651.29 78.3696   6
   1  12  -5 1617.88 93.6689   5
  -1 -12   5 1577.32 74.3972   1
  -1 -12   5 1673.53 93.6875   3
  -1 -12   4 1008.00 62.0266   1
   1  12  -4 1007.07 74.0299   5
   1  12  -4 940.615 63.3898   6
  -1 -12   4 957.086 72.5765   3
  -1 -12   3 3451.66 111.455   1
   1  12  -3 3277.02 131.858   5
   1  12  -3 3245.13 114.012   6
   1  12  -2 1858.38 100.239   5
   1  12  -2 1710.04 87.8944   6
  -1 -12   2 1853.85 84.9850   1
  -1 -12   1 953.693 64.2675   1
   1  12  -1 1038.05 70.5498   6
  -1 -12   0 164.858 28.9497   1
   1  12   0 177.307 39.2015   6
  -1 -12  -1 866.272 65.2412   1
   1  12   1 934.500 70.0914   6
  -1 -12  -2 901.301 68.8783   1
   1  12   2 935.862 72.8436   6
  -1 -12  -3 74.1094 30.1587   1
   1  12   3 95.9046 35.0504   6
  -1 -12  -4 458.765 56.3170   1
   1  12   4 410.104 56.1979   6
   1  12   5 324.577 55.1876   6
  -1 -12  -5 344.076 54.5817   1
   1  12   6 419.683 58.7751   6
  -1 -12  -6 457.755 58.6040   1
   1  12   7 699.780 73.4891   6
  -1 -12  -7 665.863 74.3980   1
   1  12   8 851.140 82.8741   6
  -1 -12  -8 848.048 83.2130   1
   1  12   9 723.286 79.5277   6
  -1 -12  -9 665.431 78.2675   1
   1  12  10 431.835 66.5662   6
  -1 -13  17 211.251 54.2984   3
  -1 -13  16 560.489 68.2188   3
   1  13 -16 571.844 74.1526   5
  -1 -13  15 317.016 59.4095   3
   1  13 -15 217.947 49.8350   5
  -1 -13  14 485.344 64.2151   3
   1  13 -14 550.469 65.5729   5
   1  13 -13 1456.91 101.996   5
  -1 -13  13 1301.67 93.5966   3
   1  13 -12 557.868 65.5566   5
  -1 -13  12 483.330 61.9729   3
  -1 -13  11 545.477 63.2103   3
   1  13 -11 627.697 69.2407   5
  -1 -13  10 752.124 71.7061   3
   1  13 -10 818.447 74.5701   5
  -1 -13   9 177.998 47.9074   3
   1  13  -9 160.727 39.7812   5
  -1 -13   8 126.436 38.5974   3
   1  13  -8 71.4706 35.1610   5
  -1 -13   8 99.7247 29.3226   1
   1  13  -7 53.9329 35.6913   5
  -1 -13   7 40.0965 23.3560   1
  -1 -13   7 73.5519 33.2903   3
   1  13  -6 28.9844 24.7525   6
  -1 -13   6 48.2403 30.1309   3
  -1 -13   6 3.29039 21.6090   1
   1  13  -6 76.3503 35.5744   5
  -1 -13   5 388.947 42.0346   1
   1  13  -5 413.246 48.4555   6
   1  13  -5 400.576 57.4240   5
  -1 -13   5 430.543 56.8418   3
  -1 -13   4 3314.62 114.648   1
   1  13  -4 3305.69 136.898   5
  -1 -13   4 3390.23 137.184   3
   1  13  -4 3380.18 118.322   6
  -1 -13   3 2034.03 92.1715   1
   1  13  -3 1949.02 93.2602   6
   1  13  -3 2064.81 109.027   5
   1  13  -2 829.112 66.3947   6
  -1 -13   2 803.115 60.8829   1
   1  13  -1 579.614 57.8919   6
  -1 -13   1 519.443 49.7601   1
   1  13   0 7.97300 25.6316   6
  -1 -13   0-57.9951 32.4966   1
   1  13   1 37.7449 32.1249   6
  -1 -13  -1-6.15927 27.1026   1
  -1 -13  -2 15.6121 27.0684   1
   1  13   2 17.7592 30.0180   6
   1  13   3 572.636 62.5504   6
  -1 -13  -3 597.621 63.3969   1
   1  13   4 320.794 52.2261   6
  -1 -13  -4 271.113 48.6052   1
   1  13   5 65.0564 36.5797   6
  -1 -13  -5 74.5224 41.6079   1
   1  13   6 301.378 49.8884   6
  -1 -13  -6 331.094 59.9959   1
  -1 -13  -7 397.135 61.9904   1
   1  13   7 435.709 61.7350   6
   1  13   8 78.5712 38.5195   6
  -1 -13  -8 53.3872 42.3845   1
  -1 -14  16 45.0337 35.6689   3
   1  14 -15 60.0284 45.9443   5
  -1 -14  15 142.984 52.3323   3
   1  14 -14 86.9633 42.2880   5
  -1 -14  14 83.7661 43.2076   3
   1  14 -13 22.2164 35.6742   5
  -1 -14  13 70.6450 38.2454   3
  -1 -14  12 173.236 41.9392   3
   1  14 -12 242.017 49.2342   5
  -1 -14  11-31.9727 40.6190   3
   1  14 -11 22.6238 31.0344   5
  -1 -14  10-24.7322 44.5611   3
   1  14 -10-4.43403 32.0648   5
   1  14  -9 231.733 48.2999   5
  -1 -14   9 242.091 55.6048   3
  -1 -14   8 40.5557 31.2638   3
   1  14  -8 16.9728 32.9810   5
  -1 -14   7 66.7009 33.0579   3
   1  14  -7 55.7902 31.7138   5
  -1 -14   6 67.0083 34.7539   3
  -1 -14   6 33.3052 26.2030   1
   1  14  -6 20.2633 23.1165   6
   1  14  -6 42.6792 34.3461   5
   1  14  -5 161.349 36.7120   6
  -1 -14   5 92.7168 35.7978   3
   1  14  -5 116.642 43.3509   5
  -1 -14   5 28.3410 25.7352   1
   1  14  -4 556.618 56.3312   6
  -1 -14   4 463.581 61.2398   3
   1  14  -4 554.410 66.8262   5
  -1 -14   4 543.178 50.5340   1
  -1 -14   3 480.790 49.5637   1
   1  14  -3 441.490 63.5747   5
   1  14  -3 396.683 49.6845   6
  -1 -14   2 1664.14 89.9313   1
   1  14  -2 1632.37 92.4785   6
   1  14  -1 1640.75 95.3223   6
  -1 -14   1 1484.00 86.4359   1
   1  14   0 647.612 64.4458   6
  -1 -14   0 616.871 58.4031   1
   1  14   1 11.1028 28.0192   6
  -1 -14  -1 12.5424 28.5640   1
   1  14   2 55.5009 34.5205   6
  -1 -14  -2 77.1396 35.7927   1
   1  14   3 30.5691 32.9529   6
  -1 -14  -3 49.3360 31.7767   1
   1  14   4 40.0653 33.7987   6
  -1 -14  -4 65.4435 36.0470   1
   1  14   5-23.2716 32.1968   6
  -1 -14  -5-6.42970 32.5410   1
   1  14   6 475.667 67.0991   6
  -1 -14  -6 451.154 64.1029   1
   1  14   7 560.214 74.3243   6
  -1 -14  -7 658.626 80.1689   1
   1  15 -14 1104.33 95.2184   5
  -1 -15  14 1017.90 93.6650   3
   1  15 -13 1041.99 93.9634   5
  -1 -15  13 987.541 89.8498   3
   1  15 -12 706.228 78.6706   5
  -1 -15  12 562.455 72.1962   3
  -1 -15  11 450.140 66.9552   3
   1  15 -11 547.130 69.7423   5
  -1 -15  10 446.460 63.3261   3
   1  15 -10 450.355 62.8309   5
  -1 -15   9 754.835 78.3165   3
   1  15  -9 679.408 73.5434   5
   1  15  -8 2066.30 121.439   5
  -1 -15   8 2100.89 120.626   3
   1  15  -7 1407.27 99.5605   5
  -1 -15   7 1284.71 95.9383   3
   1  15  -6 786.970 77.0484   5
  -1 -15   6 733.586 73.8901   3
  -1 -15   5 220.330 52.9721   3
   1  15  -5 194.544 47.2823   5
  -1 -15   5 247.977 40.5991   1
  -1 -15   4 959.859 70.7543   1
   1  15  -4 865.813 70.3821   6
   1  15  -4 924.237 82.7693   5
  -1 -15   4 811.537 79.4776   3
  -1 -15   3 2118.12 103.482   1
   1  15  -3 2078.94 105.905   6
   1  15  -2 518.830 60.6351   6
  -1 -15   2 485.272 52.6974   1
  -1 -15   1 841.756 70.8626   1
   1  15  -1 855.781 75.7116   6
  -1 -15   0 816.520 73.3821   1
   1  15   0 1009.09 82.7604   6
   1  15   1 361.113 56.1032   6
  -1 -15  -1 275.828 49.9270   1
   1  15   2 558.846 66.7152   6
  -1 -15  -2 581.093 68.6727   1
   1  15   3 977.159 87.6048   6
  -1 -15  -3 1014.44 86.6982   1
  -1 -15  -4 1166.69 94.8356   1
   1  15   4 1118.35 93.6031   6
   1  15   5 597.918 71.5881   6
  -1 -15  -5 714.585 79.5061   1
   1  16 -12 133.501 49.8995   5
  -1 -16  12 78.9652 42.4099   3
   1  16 -11 49.4761 47.2932   5
  -1 -16  11-53.5431 43.1061   3
  -1 -16  10-38.9994 38.2154   3
   1  16 -10-10.5959 33.9220   5
   1  16  -9-11.3203 34.2766   5
  -1 -16   9 40.7024 42.3585   3
   1  16  -8 62.2639 35.4306   5
  -1 -16   8 71.6640 39.9812   3
   1  16  -7 340.901 57.5875   5
  -1 -16   7 281.095 54.0946   3
   1  16  -6 175.313 45.6057   5
  -1 -16   6 164.832 47.9907   3
  -1 -16   5 2.20182 36.7762   3
   1  16  -5-4.71147 33.1094   5
  -1 -16   4 294.503 55.0899   3
  -1 -16   4 214.598 35.0692   1
  -1 -16   3 13.6440 35.5069   3
  -1 -16   3 0.82480 32.9363   1
   1  16  -3 17.2640 28.2753   6
   1  16  -2 20.7914 34.0184   6
  -1 -16   2-35.9245 36.1483   1
  -1 -16   1-10.8375 32.2900   1
   1  16  -1 53.9769 38.9354   6
   1  16   0 78.0136 37.0224   6
  -1 -16   0 70.2717 32.4124   1
  -1 -16  -1 90.0303 37.2699   1
   1  16   1 131.462 46.8456   6
  -1 -16  -2-8.44525 37.7817   1
   1  16   2 43.6360 40.4778   6
   1  16   3 276.848 56.3381   6
  -1 -16  -3 275.581 53.4646   1
  -1 -17   8 295.195 60.5634   3
  -1 -17   7 477.543 69.0914   3
   1  17  -7 476.452 66.9379   5
  -1 -17   6 15.8418 37.5164   3
   1  17  -6 45.7490 38.5474   5
  -1 -17   5 237.424 56.1198   3
  -1 -17   4 149.587 50.3311   3
  -1 -17   2 549.251 58.3925   1
   1  17  -2 533.574 66.5820   6
   1  17  -1 107.716 41.2297   6
  -1 -17   1 107.435 37.1149   1
   1  17   0 4.71031 36.3525   6
  -1 -17   0 103.685 44.6947   1
  -1 -17  -1 74.2579 39.1919   1
   1  17   1 55.9202 43.1454   6
  -1 -17  -2 27.8070 39.1181   1
   2 -18   1 184.126 47.9680   1
  -2  18  -1 148.905 48.9602   6
   2 -18   2 114.288 44.4292   1
  -2  18  -2 8.08880 37.9298   6
  -2  18  -3 76.8581 46.0837   6
   2 -18   3 66.3861 36.2157   1
   2 -18   4 81.0440 34.1278   3
   2 -18   4 36.1494 31.3848   1
   2 -18   5 783.181 75.3494   3
   2 -18   5 731.298 73.1578   1
   2 -18   6 1203.00 91.6856   1
   2 -18   6 1220.34 92.3705   3
   2 -18   7 349.727 51.5999   2
   2 -18   8 153.875 39.7940   2
   2 -17  -2 18.0940 39.7531   1
  -2  17   2 210.313 53.7490   6
  -2  17   1 273.834 53.8149   6
   2 -17  -1 158.818 47.2002   1
   2 -17   0 39.2721 35.7300   1
  -2  17   0-0.24058 31.9558   6
  -2  17  -1 54.9193 36.7849   6
   2 -17   1 95.7954 43.7182   1
  -2  17  -2 46.7718 37.2713   6
   2 -17   2 60.9517 34.3907   1
  -2  17  -3 44.9967 33.1348   6
   2 -17   3 38.0542 28.2554   1
   2 -17   4-36.1019 31.9592   1
  -2  17  -4 26.8250 34.2305   6
   2 -17   4-11.7721 27.2321   3
   2 -17   5 24.5612 25.2827   1
   2 -17   5-17.4019 26.0107   2
   2 -17   5-21.2768 30.3889   3
   2 -17   6-16.9887 26.2527   3
   2 -17   6 25.9879 26.0094   1
   2 -17   6-33.4697 27.3916   2
   2 -17   7 314.571 47.2311   1
   2 -17   7 323.438 50.7848   3
   2 -17   7 263.150 44.0982   2
   2 -17   8 495.545 61.3112   2
   2 -17   9 121.635 42.9277   2
   2 -16  -4 36.9888 44.7473   1
  -2  16   4-8.36596 37.2005   6
   2 -16  -3 61.4290 38.9634   1
  -2  16   3 91.1087 45.0964   6
  -2  16   2 44.0402 37.0304   6
   2 -16  -2 26.7078 36.7181   1
  -2  16   1 33.4213 30.9030   6
   2 -16  -1 77.8369 39.0685   1
   2 -16   0 153.799 39.6561   1
  -2  16   0 148.893 44.9378   6
  -2  16  -1 1.95867 36.5021   6
   2 -16   1 13.4455 27.1560   1
  -2  16  -2 11.7807 31.6087   6
   2 -16   2 53.3394 34.4834   1
   2 -16   3 69.9208 25.7411   2
  -2  16  -3 50.0022 32.7498   6
   2 -16   3 18.9895 23.7585   1
   2 -16   4 12.2129 22.4686   1
  -2  16  -4 20.6744 33.0587   6
   2 -16   4-9.60365 21.2076   2
   2 -16   5 637.181 64.2924   3
   2 -16   5 557.697 56.1554   2
   2 -16   5 580.524 62.3623   1
   2 -16   6 118.583 34.0129   1
   2 -16   6 81.3606 30.0743   2
   2 -16   6 125.434 36.6619   3
   2 -16   7 101.817 31.6388   2
   2 -16   7 132.456 35.9649   1
   2 -16   7 145.555 37.2727   3
  -2  16  -8 410.569 52.6865   5
   2 -16   8 441.642 54.9351   1
   2 -16   8 397.922 48.9520   3
   2 -16   8 336.081 52.3354   2
   2 -16   9 487.660 62.9653   2
   2 -16  10 271.619 52.4447   2
  -2  15   6 131.679 46.1193   6
   2 -15  -6 127.586 43.3494   1
   2 -15  -5 131.230 47.8850   1
  -2  15   5 123.351 44.6029   6
   2 -15  -4 475.411 64.7943   1
  -2  15   4 464.459 63.4970   6
  -2  15   3 723.671 74.6290   6
   2 -15  -3 762.549 76.7974   1
   2 -15  -2 573.711 68.8726   1
  -2  15   2 586.008 69.0795   6
  -2  15   1 121.133 40.1778   6
   2 -15  -1 118.753 39.2942   1
   2 -15   0 276.775 51.1902   1
  -2  15   0 254.659 49.5516   6
   2 -15   1 223.293 46.9267   1
  -2  15  -1 181.835 46.5191   6
  -2  15  -2 50.0866 35.2277   6
   2 -15   2 49.9413 22.8083   2
   2 -15   2 3.54127 22.5536   1
  -2  15  -3 77.8761 34.0677   6
   2 -15   3 38.5832 24.9035   1
   2 -15   3 34.0438 20.0995   2
   2 -15   4 1527.49 85.1759   2
   2 -15   4 1502.81 90.9501   1
  -2  15  -4 1568.21 96.6502   6
   2 -15   5 954.133 73.6927   3
   2 -15   5 976.082 71.0295   2
  -2  15  -5 923.567 71.9307   4
   2 -15   5 964.094 74.2962   1
  -2  15  -6 4.94661 31.4242   4
   2 -15   6 5.04924 22.7500   3
   2 -15   6 31.3458 29.3260   1
   2 -15   6-17.5540 22.8277   2
  -2  15  -7 307.044 50.1197   4
  -2  15  -7 283.099 45.2322   5
   2 -15   7 264.280 41.9895   3
   2 -15   7 238.574 37.4102   2
   2 -15   8 309.173 44.5308   3
  -2  15  -8 316.427 54.8252   4
  -2  15  -8 315.365 45.5926   5
   2 -15   8 254.506 44.9175   2
  -2  15  -9 227.661 43.1893   5
  -2  15  -9 256.485 52.2676   4
   2 -15   9 199.640 43.0608   2
   2 -15   9 179.876 34.8577   3
   2 -15  10 80.9955 39.5784   2
  -2  15 -10 114.576 38.8848   4
   2 -15  11-0.23401 35.2976   2
  -2  14   8 343.012 62.5308   6
   2 -14  -8 293.122 61.6995   1
  -2  14   7-29.2020 35.5492   6
   2 -14  -7 6.33729 38.4818   1
   2 -14  -6 195.178 50.5185   1
  -2  14   6 160.465 41.3136   6
   2 -14  -5-31.7577 37.6685   1
  -2  14   5 58.8689 37.7073   6
  -2  14   4 126.029 42.0317   6
   2 -14  -4 95.1965 39.4164   1
  -2  14   3 42.6843 31.3981   6
   2 -14  -3 34.4162 35.1530   1
  -2  14   2 36.4763 33.6524   6
   2 -14  -2 50.1090 34.5936   1
   2 -14  -1 112.003 35.2388   1
  -2  14   1 110.592 41.2536   6
  -2  14   0 22.5933 30.3290   6
   2 -14   0 7.26184 19.9202   2
  -2  14  -1 35.8178 31.2629   6
   2 -14   1 11.2002 24.2711   1
   2 -14   1 28.7116 22.6066   2
  -2  14  -2 143.242 34.1068   4
  -2  14  -2 108.620 34.7882   6
   2 -14   2 93.1698 28.2753   1
   2 -14   2 129.327 27.5165   2
   2 -14   3 424.028 44.3590   2
  -2  14  -3 473.453 55.9226   6
   2 -14   3 489.751 52.1833   1
  -2  14  -3 472.744 51.1383   4
  -2  14  -4 1454.09 84.8894   4
  -2  14  -4 1508.25 90.8529   6
   2 -14   4 1514.66 87.8114   1
   2 -14   4 1490.23 82.9339   2
   2 -14   5 1295.70 81.7354   3
   2 -14   5 1202.99 80.2769   1
   2 -14   5 1269.42 79.2625   2
  -2  14  -5 1200.98 79.3025   4
   2 -14   6 231.018 37.9257   2
  -2  14  -6 287.981 44.5483   5
   2 -14   6 223.017 39.0256   3
  -2  14  -6 294.133 47.8880   4
  -2  14  -7-4.80597 24.7347   5
   2 -14   7-27.6384 27.5232   2
   2 -14   7 25.8721 19.2953   3
  -2  14  -7 31.1439 29.4093   4
  -2  14  -8 19.7505 30.6894   4
   2 -14   8 4.98469 22.1423   3
   2 -14   8-40.7434 33.8226   2
  -2  14  -8 40.6914 28.5807   5
  -2  14  -9 6.89560 24.8855   5
  -2  14  -9-4.37885 30.0015   4
   2 -14   9-27.9161 26.9927   3
   2 -14   9-47.6274 39.2597   2
  -2  14 -10 68.7198 37.3231   4
  -2  14 -10 61.5654 30.2288   5
   2 -14  10 44.7281 35.8623   2
   2 -14  10 11.6365 21.7362   3
   2 -14  11-3.75649 34.5151   2
  -2  14 -11 19.2696 33.7759   4
  -2  14 -12 543.686 72.0135   4
   2 -14  12 526.316 68.4801   2
  -2  14 -13 813.364 83.5792   4
   2 -14  13 781.432 84.3041   2
  -2  13  10 985.669 94.1576   6
   2 -13 -10 944.721 93.5926   1
  -2  13   9 28.8330 38.6157   6
   2 -13  -9-36.6741 41.3554   1
  -2  13   8 71.1246 40.8950   6
   2 -13  -8 80.9456 46.9383   1
   2 -13  -7 192.668 49.6681   1
  -2  13   7 149.906 44.5676   6
   2 -13  -6 121.059 43.0909   1
  -2  13   6 152.482 45.8760   6
   2 -13  -5 102.081 39.0205   1
  -2  13   5 64.0745 31.4497   6
  -2  13   4 17.6139 31.3885   6
   2 -13  -4 36.8223 31.9485   1
   2 -13  -3 1806.56 103.132   1
  -2  13   3 1803.32 104.376   6
   2 -13  -2 686.128 69.5565   1
  -2  13   2 568.360 63.6927   6
   2 -13  -1 154.429 24.3705   2
   2 -13  -1 182.665 40.0430   1
  -2  13   1 169.135 41.4700   6
  -2  13   0 1789.04 97.6853   6
  -2  13   0 1721.45 74.8008   4
   2 -13   0 1742.24 72.7366   2
   2 -13   0 1662.55 93.4775   1
   2 -13   1 805.786 66.8842   1
  -2  13  -1 840.530 57.6504   4
  -2  13  -1 852.697 69.8623   6
   2 -13   1 800.314 53.7455   2
  -2  13  -2 45.4122 32.5986   6
  -2  13  -2 56.0723 27.2569   4
   2 -13   2 8.97824 22.7953   1
   2 -13   2 50.8459 21.6011   2
  -2  13  -3 659.100 54.0128   4
  -2  13  -3 552.595 55.8593   6
   2 -13   3 598.115 49.5078   2
   2 -13   3 607.015 54.5115   1
  -2  13  -4 122.637 33.1110   4
  -2  13  -4 134.011 36.1478   6
   2 -13   4 170.350 32.5163   2
   2 -13   5 305.879 40.5682   2
   2 -13   5 316.860 41.2542   3
  -2  13  -5 298.462 43.3778   4
  -2  13  -5 304.578 42.1313   5
  -2  13  -6 725.203 63.6031   4
  -2  13  -6 700.606 58.0250   5
   2 -13   6 655.373 57.7190   2
   2 -13   6 709.843 57.3840   3
  -2  13  -7 502.317 50.5416   5
  -2  13  -7 559.075 59.5250   4
   2 -13   7 478.738 52.7253   2
   2 -13   7 579.888 51.8286   3
  -2  13  -8 378.377 56.2845   4
  -2  13  -8 443.199 47.8350   5
   2 -13   8 419.309 45.3787   3
   2 -13   8 424.621 54.0871   2
  -2  13  -9 147.980 39.5676   4
  -2  13  -9 184.841 35.7393   5
   2 -13   9 142.576 29.8671   3
   2 -13   9 110.441 38.3549   2
   2 -13  10 74.3313 33.1847   2
  -2  13 -10 61.2111 32.2886   4
   2 -13  10 101.421 27.4970   3
  -2  13 -10 99.7998 30.7490   5
   2 -13  11 72.9863 38.1198   2
   2 -13  11 36.5703 22.4537   3
  -2  13 -11 11.9995 34.1605   4
  -2  13 -12 140.447 44.3141   4
   2 -13  12 159.979 46.3710   2
  -2  13 -13-1.34597 36.0799   4
   2 -13  13 36.0585 33.7660   2
   2 -13  14 108.604 48.4769   2
  -2  13 -14 16.0048 36.0217   4
   2 -12 -11 70.6787 51.6356   1
  -2  12  11 4.63605 37.2925   6
   2 -12 -10 418.271 67.3713   1
  -2  12  10 320.464 57.8223   6
  -2  12   9 457.631 65.0887   6
   2 -12  -9 388.481 61.7466   1
   2 -12  -8 13.2590 34.5979   1
  -2  12   8 8.30660 31.6865   6
   2 -12  -7 12.4294 33.3724   1
  -2  12   7 44.6169 31.7304   6
   2 -12  -6 142.415 43.8341   1
  -2  12   6 115.220 38.7032   6
  -2  12   5 2.90424 30.0074   6
   2 -12  -5-9.38475 30.9427   1
  -2  12   4 175.082 40.1715   6
   2 -12  -4 178.593 45.2814   1
   2 -12  -3 103.114 36.7850   1
  -2  12   3 112.908 35.6070   6
   2 -12  -2 790.121 44.4632   2
   2 -12  -2 763.060 66.1924   1
  -2  12   2 689.379 64.4072   6
  -2  12   1 728.295 46.3646   4
   2 -12  -1 762.740 66.1373   1
   2 -12  -1 714.281 44.7985   2
  -2  12   1 772.372 65.1066   6
  -2  12   0 85.9337 24.0442   4
  -2  12   0 95.1315 36.0581   6
   2 -12   0 101.193 31.2903   1
   2 -12   0 101.084 23.0217   2
  -2  12  -1 271.441 42.4571   6
   2 -12   1 259.379 30.5765   2
  -2  12  -1 290.208 35.9988   4
   2 -12   1 213.896 33.2218   1
   2 -12   2-7.28839 22.9739   1
   2 -12   2 77.8848 23.3334   2
  -2  12  -2 56.7776 29.6108   6
  -2  12  -2 68.7588 24.1899   4
  -2  12  -3 338.628 41.5447   4
  -2  12  -3 309.901 42.1003   6
   2 -12   3 358.655 38.6004   2
   2 -12   4 360.061 40.7716   2
  -2  12  -4 367.797 45.0314   6
  -2  12  -4 425.872 45.6620   4
  -2  12  -5 1908.87 86.9830   5
  -2  12  -5 1861.40 92.1165   4
   2 -12   5 1919.88 86.1635   3
   2 -12   5 1727.27 85.6185   2
   2 -12   6 96.7214 24.6604   3
  -2  12  -6 83.4630 30.3806   4
  -2  12  -6 71.7883 25.0707   5
   2 -12   6 33.2732 21.8952   2
  -2  12  -7 520.876 57.5890   4
   2 -12   7 541.344 47.7530   3
  -2  12  -7 498.381 48.2806   5
   2 -12   7 474.688 50.3608   2
  -2  12  -8 69.0928 33.6611   4
   2 -12   8 62.2123 28.5623   2
   2 -12   8 41.7078 19.1658   3
  -2  12  -8 77.7458 27.1673   5
   2 -12   9 89.4013 22.1794   3
  -2  12  -9 182.481 40.6592   4
  -2  12  -9 138.124 31.3069   5
   2 -12   9 176.568 39.2960   2
   2 -12  10-19.0441 31.9192   2
  -2  12 -10 22.4681 24.9535   5
  -2  12 -10 4.25475 30.9829   4
   2 -12  10-32.7599 23.7658   3
  -2  12 -11 0.92528 22.1814   5
   2 -12  11-13.3109 20.2344   3
  -2  12 -11-28.1559 32.7599   4
   2 -12  11-24.9916 32.6231   2
   2 -12  12 70.4722 25.2668   3
  -2  12 -12 1.54047 31.3914   4
   2 -12  12 87.9664 36.7721   2
   2 -12  13 13.2322 33.1545   2
  -2  12 -13 2.67662 34.9656   4
  -2  12 -14 187.039 50.4497   4
   2 -12  14 182.946 54.1107   2
  -2  12 -15 30.4090 38.4763   4
  -2  11  12 842.664 84.1778   6
   2 -11 -12 768.384 85.2293   1
  -2  11  11 727.719 77.7979   6
   2 -11 -11 662.784 76.6830   1
  -2  11  10 275.738 54.9526   6
   2 -11 -10 282.017 52.8657   1
   2 -11  -9 31.3517 36.5007   1
  -2  11   9 59.3321 31.5551   6
  -2  11   8 1604.44 104.077   6
   2 -11  -8 1688.32 103.223   1
   2 -11  -7 1688.15 101.322   1
  -2  11   7 1673.75 102.440   6
   2 -11  -6 911.195 76.0612   1
  -2  11   6 948.810 77.8856   6
   2 -11  -5 689.342 65.0092   1
  -2  11   5 748.831 67.3275   6
   2 -11  -4 943.924 35.2097   2
   2 -11  -4 1150.98 78.2124   1
  -2  11   4 1126.22 78.7944   6
   2 -11  -3 821.474 67.9291   1
   2 -11  -3 809.171 39.0319   2
  -2  11   3 711.907 63.9085   6
  -2  11   2 4538.97 96.7102   4
   2 -11  -2 4772.33 145.369   1
  -2  11   2 4638.62 147.236   6
   2 -11  -2 4654.35 97.1054   2
   2 -11  -1 6342.52 164.027   1
  -2  11   1 6161.73 167.635   6
  -2  11   1 6268.02 122.816   4
   2 -11  -1 6120.27 118.743   2
  -2  11   0 1672.69 87.3561   6
  -2  11   0 1727.58 71.7854   4
   2 -11   0 1702.44 67.0432   2
   2 -11   0 1693.82 87.2294   1
  -2  11  -1 2445.55 86.0426   4
   2 -11   1 2407.74 82.8696   2
   2 -11   1 2368.34 98.1324   1
  -2  11  -1 2510.33 103.194   6
   2 -11   2 876.532 54.3021   2
  -2  11  -2 937.239 59.6838   4
  -2  11  -2 918.989 68.2016   6
  -2  11  -3 184.142 39.4485   6
  -2  11  -3 216.602 36.3143   4
   2 -11   3 211.478 33.7731   2
  -2  11  -4 2222.62 94.9866   4
   2 -11   4 2216.37 90.4651   2
  -2  11  -4 2161.30 96.8004   6
  -2  11  -4 2302.41 91.2628   5
   2 -11   5 1144.05 66.1223   3
  -2  11  -5 1124.60 70.9609   4
   2 -11   5 1164.62 71.2399   2
  -2  11  -5 1242.78 69.6517   5
   2 -11   6 1258.30 73.9737   2
  -2  11  -6 1327.92 79.2766   4
  -2  11  -6 1449.39 72.0708   5
   2 -11   6 1380.04 69.1447   3
  -2  11  -7 965.023 70.4924   4
   2 -11   7 836.390 63.6075   2
  -2  11  -7 1007.49 61.2689   5
   2 -11   7 931.757 58.2504   3
  -2  11  -8 243.281 44.4653   4
  -2  11  -8 305.582 37.7535   5
   2 -11   8 245.920 31.5713   3
   2 -11   8 270.323 43.0998   2
   2 -11   9 869.936 71.0484   2
   2 -11   9 908.450 59.9874   3
  -2  11  -9 983.610 78.0248   4
  -2  11  -9 1057.24 65.2406   5
  -2  11 -10 3080.80 109.109   5
   2 -11  10 2816.22 127.044   2
  -2  11 -10 2860.29 130.305   4
   2 -11  10 2823.32 102.493   3
   2 -11  11 4027.77 152.220   2
  -2  11 -11 4135.53 159.849   4
   2 -11  11 4265.81 127.258   3
  -2  11 -11 4322.22 130.160   5
   2 -11  12 581.085 53.3161   3
  -2  11 -12 530.958 50.5289   5
   2 -11  12 532.859 63.0644   2
  -2  11 -12 479.593 59.9257   4
   2 -11  13 1114.15 70.2893   3
  -2  11 -13 1350.48 98.8243   4
   2 -11  13 1193.21 91.7496   2
   2 -11  14 1198.93 95.3877   2
  -2  11 -14 1271.46 99.7306   4
   2 -11  15-11.9419 40.8952   2
  -2  11 -15 28.8379 37.9978   4
   2 -10 -13 60.0233 47.1292   1
  -2  10  13 114.287 46.1311   6
   2 -10 -12 54.3127 44.9016   1
  -2  10  12 41.3832 40.4882   6
  -2  10  11 6.01635 29.9994   6
   2 -10 -11-8.53338 39.7968   1
  -2  10  10 260.154 48.3498   6
   2 -10 -10 340.765 57.4231   1
  -2  10   9 131.199 43.4203   6
   2 -10  -9 144.406 37.7017   1
   2 -10  -8 156.702 46.3185   1
  -2  10   8 119.116 37.6944   6
  -2  10   7 264.403 45.3782   6
   2 -10  -7 199.992 40.9640   1
  -2  10   6 348.606 50.5677   6
   2 -10  -6 340.713 51.9136   1
   2 -10  -5 491.715 53.8710   1
  -2  10   5 555.765 57.1071   6
   2 -10  -5 289.845 14.9889   2
  -2  10   4 58.3189 25.7589   6
   2 -10  -4 38.7183 9.41846   2
   2 -10  -4 94.7054 31.7481   1
  -2  10   3 577.267 54.2297   6
  -2  10   3 543.313 30.8055   4
   2 -10  -3 489.855 51.9842   1
   2 -10  -3 587.539 32.3004   4
   2 -10  -3 573.025 31.3277   2
   2 -10  -2 176.683 20.0340   4
   2 -10  -2 198.746 35.4382   1
  -2  10   2 188.785 37.4041   6
   2 -10  -2 278.840 28.2646   2
  -2  10   2 182.626 22.0026   4
  -2  10   1 218.099 37.5804   6
   2 -10  -1 225.717 35.2917   1
   2 -10  -1 169.531 20.9515   2
  -2  10   1 216.819 25.0353   4
  -2  10   0 79.1699 22.0979   4
  -2  10   0 63.2446 29.5438   6
   2 -10   0 55.2520 24.5187   1
   2 -10   0 60.7382 17.6388   2
  -2  10  -1 2.30879 19.8818   6
   2 -10   1-22.5784 23.3526   1
  -2  10  -1 8.75111 17.0499   4
   2 -10   1 9.48585 13.0267   2
  -2  10  -2 130.434 28.7824   6
   2 -10   2 128.394 22.8620   2
  -2  10  -2 133.977 26.1004   4
  -2  10  -3 827.097 54.7839   4
   2 -10   3 842.376 52.5891   2
  -2  10  -3 868.384 57.8066   6
   2 -10   4 24.5727 17.2359   2
  -2  10  -4 77.0902 27.0284   4
  -2  10  -4 33.9219 20.8916   5
  -2  10  -4 43.9967 26.3250   6
  -2  10  -5 30.6644 25.9412   4
   2 -10   5 44.4979 19.3083   3
   2 -10   5-39.8871 25.5710   2
  -2  10  -5 39.3014 19.8729   5
  -2  10  -6 79.8008 30.0801   4
   2 -10   6 31.8506 25.5205   2
  -2  10  -6 79.0359 24.9386   5
   2 -10   6 69.5092 19.0836   3
   2 -10   7 219.235 27.2060   3
  -2  10  -7 193.387 38.3184   4
  -2  10  -7 214.737 30.4484   5
   2 -10   7 227.518 37.2956   2
   2 -10   8 568.497 44.5573   3
  -2  10  -8 567.432 56.7250   4
  -2  10  -8 607.880 47.0397   5
   2 -10   8 544.716 54.7726   2
   2 -10   9 2774.97 94.5873   3
  -2  10  -9 2666.15 119.493   4
   2 -10   9 2723.99 115.485   2
  -2  10  -9 2904.68 97.6256   5
   2 -10  10 73.5870 31.9205   2
  -2  10 -10 116.663 34.4631   4
   2 -10  10 66.4418 19.9982   3
  -2  10 -10 71.6434 25.4041   5
   2 -10  11 89.0303 20.7251   3
  -2  10 -11 85.6421 37.2794   4
  -2  10 -11 102.966 28.0201   5
   2 -10  11 77.2978 36.8192   2
  -2  10 -12 103.242 36.6166   4
   2 -10  12 91.9833 35.3848   2
   2 -10  12 3.10763 25.7105   3
  -2  10 -12 25.1112 20.8889   5
   2 -10  13 459.876 49.0191   3
   2 -10  13 554.806 65.2364   2
  -2  10 -13 534.703 66.8369   4
  -2  10 -13 540.724 51.4462   5
  -2  10 -14 430.655 62.1337   4
   2 -10  14 401.028 60.7210   2
  -2  10 -15-7.74888 34.4357   4
   2 -10  15 16.6965 44.5636   2
  -2  10 -16 812.364 86.2129   4
   2 -10  16 706.358 84.6493   2
  -2   9  15 708.340 78.4536   6
   2  -9 -15 669.874 88.5870   1
   2  -9 -14 264.990 64.1854   1
  -2   9  14 235.166 52.2200   6
   2  -9 -13 103.423 38.8433   1
  -2   9  13 176.613 44.2506   6
   2  -9 -12 12.6736 34.7747   1
  -2   9  12 26.3775 32.7600   6
  -2   9  11 109.300 38.5968   6
   2  -9 -11 68.2608 37.1214   1
   2  -9 -10 154.546 38.0702   1
  -2   9  10 135.269 43.2477   6
  -2   9   9 88.9168 33.1793   6
   2  -9  -9 93.9641 36.4640   1
  -2   9   8 25.9398 29.3790   6
   2  -9  -8-1.38032 28.5608   1
  -2   9   7 77.7906 30.9409   6
   2  -9  -7 24.9722 29.1684   1
  -2   9   6 354.968 45.5302   6
   2  -9  -6 238.201 41.5518   1
   2  -9  -5-6.41927 6.13155   2
  -2   9   5 29.5036 23.4599   6
   2  -9  -5 13.7737 23.7263   1
   2  -9  -4 75.6930 10.5323   2
  -2   9   4 75.6168 26.1467   6
   2  -9  -4 79.2041 27.5669   1
  -2   9   4 76.9821 12.5759   4
   2  -9  -4 19.1068 10.4607   4
   2  -9  -3 47.3910 12.6575   2
  -2   9   3 49.1352 13.2058   4
  -2   9   3 39.9024 22.8639   6
   2  -9  -3 21.6598 24.2551   1
   2  -9  -3 84.2540 15.2210   4
   2  -9  -2 21.2738 13.7609   4
  -2   9   2 49.5697 15.2716   4
   2  -9  -2 47.4817 24.5922   1
  -2   9   2 57.3628 27.1300   6
   2  -9  -1 590.784 34.7123   4
  -2   9   1 564.007 36.0051   4
  -2   9   1 651.362 50.8554   6
   2  -9  -1 613.729 48.9816   1
   2  -9  -1 597.424 34.8199   2
   2  -9   0 51.7040 21.2092   1
  -2   9   0 57.0475 19.9799   4
  -2   9   0 72.7586 24.7572   6
   2  -9   0 84.6332 17.9500   2
  -2   9  -1 649.429 50.8193   6
  -2   9  -1 611.745 41.1793   4
   2  -9   1 619.668 39.8871   2
  -2   9  -2 395.284 41.5951   6
  -2   9  -2 412.763 37.5940   4
   2  -9   2 429.666 34.8640   2
   2  -9   3 10.3034 14.1950   2
  -2   9  -3 18.3653 18.1987   5
  -2   9  -3 19.5575 20.2336   4
  -2   9  -3 19.1477 23.4521   6
   2  -9   4-11.7282 19.9062   2
  -2   9  -4 5.97960 19.5502   4
  -2   9  -4 36.4724 19.6414   5
  -2   9  -5 322.061 38.1105   4
   2  -9   5 339.221 31.6544   3
  -2   9  -5 327.641 32.9097   5
   2  -9   5 276.312 32.6134   2
  -2   9  -6 25.3247 23.0457   4
  -2   9  -6 24.4977 17.8208   5
   2  -9   6 21.0124 13.4548   3
   2  -9   6 19.2836 20.8372   2
  -2   9  -7 131.346 25.1026   5
   2  -9   7 86.0297 19.1513   3
  -2   9  -7 124.818 30.9392   4
   2  -9   7 98.8438 26.5749   2
   2  -9   8 9.98240 13.3437   3
  -2   9  -8 1.26684 17.1978   5
  -2   9  -8-12.9285 24.9257   4
   2  -9   8 37.6223 24.6965   2
  -2   9  -9 441.110 39.6091   5
  -2   9  -9 445.270 50.8289   4
   2  -9   9 428.966 37.6556   3
   2  -9   9 461.740 51.8278   2
  -2   9 -10 189.609 28.9951   5
  -2   9 -10 189.399 40.4772   4
   2  -9  10 150.740 33.5415   2
   2  -9  10 156.650 26.1061   3
  -2   9 -11-5.26017 28.2355   4
  -2   9 -11-15.9654 19.5559   5
   2  -9  11-0.41520 29.5864   2
  -2   9 -12 145.973 39.0293   4
   2  -9  12 101.190 22.1621   3
  -2   9 -12 134.311 28.0970   5
   2  -9  12 136.604 37.4973   2
   2  -9  13 58.6772 35.6450   2
  -2   9 -13-1.20817 30.4395   4
   2  -9  13-11.0524 23.1880   3
  -2   9 -13-7.03148 22.8545   5
   2  -9  14 108.146 31.0646   3
  -2   9 -14 138.295 42.0076   4
   2  -9  14 116.190 40.2090   2
   2  -9  15-3.49151 37.2454   2
  -2   9 -15-12.9431 33.8949   4
   2  -9  16 507.898 73.4785   2
  -2   9 -16 523.584 69.1373   4
  -2   9 -17 26.2206 35.0714   4
   2  -9  17 43.2096 49.1041   2
  -2   8  16 19.0896 38.1607   6
   2  -8 -16 40.1030 60.5718   1
   2  -8 -15-69.0155 60.6868   1
  -2   8  15-22.6104 35.7839   6
   2  -8 -14 46.4637 48.7445   1
  -2   8  14 94.6243 40.9436   6
   2  -8 -13 37.8680 38.7047   1
  -2   8  13 60.7045 34.5894   6
   2  -8 -12 83.3142 41.0311   1
  -2   8  12 37.4314 29.4905   6
  -2   8  11 128.022 37.6416   6
   2  -8 -11 130.004 38.7855   1
  -2   8  10 89.0842 40.2285   6
   2  -8 -10 112.991 37.5749   1
  -2   8   9 1606.81 93.3302   6
   2  -8  -9 1651.99 91.4095   1
  -2   8   8 855.181 66.4613   6
   2  -8  -8 901.663 68.5900   1
   2  -8  -7 1125.44 72.8284   1
  -2   8   7 1168.51 75.6785   6
  -2   8   6 11.0767 24.6873   6
   2  -8  -6 28.7232 28.3515   1
   2  -8  -5 533.047 50.7578   1
  -2   8   5 611.996 51.9397   6
  -2   8   5 403.821 16.8866   4
   2  -8  -5 386.634 16.4800   2
   2  -8  -4 131.423 29.0149   1
  -2   8   4 111.852 13.2255   4
   2  -8  -4 112.790 12.2677   2
  -2   8   4 115.528 27.8288   6
  -2   8   3 1989.51 51.4929   4
  -2   8   3 2080.86 86.5437   6
   2  -8  -3 2022.25 50.2262   2
   2  -8  -3 2035.76 85.1715   1
   2  -8  -3 2069.75 51.2614   4
   2  -8  -2 434.486 27.3143   4
  -2   8   2 381.864 28.0155   4
   2  -8  -2 429.074 42.5369   1
   2  -8  -2 477.859 30.2714   2
  -2   8   2 406.756 41.3887   6
  -2   8   1 106.457 28.4082   6
   2  -8  -1 47.1057 12.4977   2
   2  -8  -1 79.3226 13.5716   4
   2  -8  -1 71.5145 24.0383   1
  -2   8   1 88.9654 18.3815   4
  -2   8   0 505.649 35.2143   4
  -2   8   0 469.541 44.2825   6
   2  -8   0 506.270 33.6071   2
  -2   8  -1 27.7628 20.4031   6
  -2   8  -1 56.5903 18.8941   4
   2  -8   1 27.3419 14.6435   2
  -2   8  -2 4550.00 116.731   6
   2  -8   2 4532.30 104.222   2
  -2   8  -2 4421.19 106.474   4
  -2   8  -3 173.315 28.2922   4
  -2   8  -3 213.602 26.4895   5
  -2   8  -3 199.593 30.4982   6
   2  -8   3 207.969 27.6848   2
  -2   8  -4 1612.61 60.7562   5
  -2   8  -4 1589.45 72.4991   4
   2  -8   4 1631.11 61.0373   3
   2  -8   4 1519.83 66.3829   2
  -2   8  -5 583.215 47.6298   4
   2  -8   5 595.653 37.8405   3
  -2   8  -5 583.130 39.3083   5
   2  -8   5 580.045 45.8026   2
   2  -8   6 1110.13 49.9131   3
  -2   8  -6 1124.42 66.9986   4
   2  -8   6 1140.01 64.4097   2
  -2   8  -6 1164.62 53.8320   5
   2  -8   7 299.483 28.6553   3
  -2   8  -7 302.874 40.9052   4
  -2   8  -7 262.742 29.2604   5
   2  -8   7 283.138 38.5883   2
  -2   8  -8 100.276 28.9069   4
   2  -8   8 121.777 21.5548   3
   2  -8   8 114.308 28.8885   2
  -2   8  -8 136.071 23.9205   5
   2  -8   9 1437.94 62.7375   3
  -2   8  -9 1516.02 85.5130   4
   2  -8   9 1382.66 78.7829   2
  -2   8  -9 1578.75 67.4653   5
   2  -8  10 77.0741 28.8961   2
  -2   8 -10 50.8801 28.5323   4
  -2   8 -10 110.593 24.3919   5
   2  -8  10-27.7062 26.9157   3
  -2   8 -11 186.764 29.2180   5
  -2   8 -11 220.633 44.9366   4
   2  -8  11 215.432 42.2533   2
   2  -8  11 152.139 24.1782   3
  -2   8 -12 1657.79 97.3671   4
   2  -8  12 1683.55 76.4046   3
   2  -8  12 1555.47 91.9102   2
  -2   8 -12 1608.73 75.0412   5
   2  -8  13 93.4000 29.7963   3
  -2   8 -13 31.7301 22.7891   5
   2  -8  13 50.8482 32.9741   2
  -2   8 -13 30.8540 29.8243   4
   2  -8  14 13.6954 30.4570   2
  -2   8 -14-9.13044 30.6680   4
   2  -8  14 60.0547 30.7341   3
  -2   8 -14 24.1096 21.3513   5
   2  -8  15 38.1333 26.8652   3
   2  -8  15 38.6081 35.3208   2
  -2   8 -15-7.01851 33.3659   4
  -2   8 -16 193.810 48.2704   4
   2  -8  16 222.122 52.0128   2
  -2   8 -17 3.57089 33.3730   4
   2  -8  17-9.62736 53.4763   2
  -2   8 -18-16.1295 35.9751   4
   2  -8  18 45.8291 57.4906   2
  -2   7  17 125.527 48.2534   6
   2  -7 -16 14.7111 58.2659   1
  -2   7  16-51.9817 38.4645   6
   2  -7 -15-26.1761 56.7078   1
  -2   7  15 116.490 38.8271   6
   2  -7 -14-5.75063 45.1803   1
  -2   7  14 84.7530 38.9289   6
   2  -7 -13-65.1445 47.1791   1
  -2   7  13 2.39177 29.5529   6
  -2   7  12 415.435 54.5977   6
   2  -7 -12 419.062 52.9155   1
   2  -7 -11 2011.49 104.047   1
  -2   7  11 1996.91 107.616   6
   2  -7 -10 76.9585 32.8403   1
  -2   7  10 154.318 36.4306   6
   2  -7  -9 929.113 69.5694   1
  -2   7   9 988.601 70.3037   6
  -2   7   8 347.368 45.7097   6
   2  -7  -8 377.749 45.4558   1
  -2   7   7 28.2948 22.7177   6
   2  -7  -7 23.0201 23.9771   1
   2  -7  -6 795.088 57.5407   1
  -2   7   6 765.280 58.8386   6
  -2   7   5 2084.59 37.3451   4
   2  -7  -5 2071.60 37.8314   2
  -2   7   5 2553.87 95.3217   6
   2  -7  -5 2298.15 90.2205   1
   2  -7  -4 379.706 19.6253   2
  -2   7   4 376.776 20.0679   4
   2  -7  -4 421.046 42.7073   1
  -2   7   4 355.438 39.3523   6
   2  -7  -3 24.4176 8.69290   2
  -2   7   3 38.4786 12.5468   4
   2  -7  -3 42.1341 22.7934   1
   2  -7  -3 37.3797 8.56836   4
  -2   7   3 47.2407 23.8872   6
   2  -7  -2 280.862 35.4054   1
   2  -7  -2 301.680 22.5561   2
  -2   7   2 303.966 24.2615   4
  -2   7   2 315.495 35.6615   6
   2  -7  -2 335.466 24.2334   4
   2  -7  -1 259.614 20.9620   4
   2  -7  -1 263.152 33.5599   1
   2  -7  -1 233.532 19.8201   2
  -2   7   1 237.747 22.5802   4
  -2   7   1 274.750 34.1214   6
   2  -7   0 882.632 41.2170   4
  -2   7   0 790.376 42.8776   4
  -2   7   0 782.233 50.1609   6
   2  -7   0 894.889 41.0715   2
  -2   7  -1 2026.40 74.7778   6
   2  -7   1 2054.14 64.2033   2
  -2   7  -1 2033.69 66.1017   4
  -2   7  -2 4572.37 102.877   4
  -2   7  -2 4525.40 109.184   6
   2  -7   2 4633.59 101.222   2
   2  -7   2 4673.96 96.1832   5
  -2   7  -3 542.148 41.1272   4
   2  -7   3 588.607 35.1682   5
   2  -7   3 588.037 39.8184   2
  -2   7  -3 554.919 34.9567   5
  -2   7  -4 3324.98 96.5551   4
   2  -7   4 3408.33 78.9615   5
   2  -7   4 3404.28 78.9666   3
   2  -7   4 3154.14 92.2307   2
  -2   7  -4 3273.08 78.3327   5
  -2   7  -5 1947.31 79.4535   4
  -2   7  -5 1995.57 62.2589   5
   2  -7   5 1906.09 59.5439   3
   2  -7   5 1828.53 74.9448   2
   2  -7   5 1988.65 60.6643   5
   2  -7   6 1808.57 78.2750   2
   2  -7   6 1904.94 60.4407   5
   2  -7   6 1851.80 61.0982   3
  -2   7  -6 1973.22 82.2992   4
  -2   7  -6 1989.01 63.8315   5
   2  -7   7 96.1564 16.1564   3
   2  -7   7 63.1354 24.0952   2
  -2   7  -7 77.7228 27.6187   4
  -2   7  -7 66.2225 17.5299   5
   2  -7   8 228.440 24.9119   3
  -2   7  -8 233.931 35.6367   4
  -2   7  -8 251.326 28.5696   5
   2  -7   8 226.305 34.8176   2
  -2   7  -9 265.669 39.6869   4
  -2   7  -9 228.878 27.5902   5
   2  -7   9 116.872 15.1517   3
   2  -7   9 259.877 39.6597   2
   2  -7  10-38.7628 21.7711   3
  -2   7 -10-12.4209 16.7483   5
   2  -7  10 20.8689 24.6011   2
  -2   7 -10 15.7150 25.0234   4
  -2   7 -11 671.766 61.1323   4
   2  -7  11 644.540 47.5865   3
  -2   7 -11 623.871 44.4392   5
   2  -7  11 614.636 57.0676   2
  -2   7 -12 20.4146 18.7942   5
  -2   7 -12 46.2207 29.9234   4
   2  -7  12 22.4838 22.6684   3
   2  -7  12 2.67959 27.3584   2
  -2   7 -13 2852.70 128.333   4
  -2   7 -13 2666.76 96.4783   5
   2  -7  13 2633.03 119.378   2
   2  -7  13 2945.15 101.268   3
  -2   7 -14 1578.51 98.2005   4
   2  -7  14 1461.81 78.0361   3
   2  -7  14 1375.39 91.4542   2
  -2   7 -14 1403.03 75.1996   5
  -2   7 -15 92.8807 39.1176   4
   2  -7  15 44.4192 26.3849   3
   2  -7  15 73.6871 37.0552   2
  -2   7 -16 155.707 46.6844   4
   2  -7  16 75.9712 36.8681   2
  -2   7 -17 64.8235 37.2635   4
   2  -7  17 103.125 45.0227   2
  -2   7 -18 58.7769 38.7982   4
   2  -7  18 97.1538 60.2594   2
  -2   6  17 35.4029 34.2150   6
   2  -6 -17 87.2105 69.1650   1
  -2   6  16 5.08407 33.5738   6
   2  -6 -16-30.1660 51.6936   1
  -2   6  15-1.62047 30.2486   6
   2  -6 -15 26.6147 39.3502   1
   2  -6 -14-56.2244 41.4645   1
  -2   6  14-9.08918 29.9695   6
  -2   6  13 37.6541 30.2154   6
   2  -6 -13-107.756 53.4438   1
   2  -6 -12-43.7506 39.9267   1
  -2   6  12 3.29674 28.6950   6
  -2   6  11 559.918 56.0065   6
   2  -6 -11 462.353 52.1765   1
  -2   6  10 2326.84 103.946   6
   2  -6 -10 2187.90 102.758   1
  -2   6   9 4.18714 22.8680   6
   2  -6  -9-28.5684 25.4740   1
  -2   6   8 225.961 36.2630   6
   2  -6  -8 217.158 35.0996   1
  -2   6   7 41.9480 5.69191   2
  -2   6   7 92.3097 25.8789   6
   2  -6  -7 58.1386 24.2200   1
  -2   6   6 156.684 10.1424   4
   2  -6  -6 191.149 32.0317   1
  -2   6   6 220.242 35.2036   6
  -2   6   6 141.943 10.2646   2
   2  -6  -5 694.507 50.1636   1
  -2   6   5 618.135 21.3548   4
  -2   6   5 697.172 50.7046   6
  -2   6   5 595.438 21.0339   2
   2  -6  -5 621.114 22.1092   2
   2  -6  -4 31.9306 22.2349   1
  -2   6   4 11.2920 9.43782   4
  -2   6   4-12.0551 21.0014   6
   2  -6  -4 1.84750 6.70860   2
  -2   6   4 17.4802 9.17393   2
   2  -6  -3 67.1599 25.4770   1
  -2   6   3 66.6797 25.5583   6
   2  -6  -3 27.4038 8.64545   2
   2  -6  -3 31.5515 7.73176   4
  -2   6   3 58.3981 14.0104   4
  -2   6   2 198.940 28.2391   6
   2  -6  -2 255.196 19.8780   4
  -2   6   2 214.816 19.4891   4
   2  -6  -2 213.408 29.8932   1
   2  -6  -2 229.287 18.8188   2
  -2   6   1-5.24144 19.4042   6
  -2   6   1 19.1717 13.4172   4
   2  -6  -1 39.0110 13.4564   2
   2  -6  -1-2.05056 11.5447   4
   2  -6  -1 12.2677 10.9179   5
   2  -6   0 2263.37 64.1160   5
  -2   6   0 2298.08 74.2729   6
   2  -6   0 2312.87 61.0418   2
  -2   6   0 2330.89 62.7903   4
   2  -6   0 2312.04 60.7974   4
   2  -6   1 3449.06 78.8354   4
  -2   6  -1 3491.68 81.2096   4
   2  -6   1 3451.38 79.0067   2
  -2   6  -1 3240.85 87.9507   6
   2  -6   1 3446.36 76.0420   5
  -2   6  -2 29.9151 20.4603   6
   2  -6   2 42.1357 15.3892   2
  -2   6  -2 44.9711 17.3998   4
   2  -6   2 90.3885 18.2300   5
  -2   6  -2 41.0016 15.8818   5
  -2   6  -3 227.087 21.6809   5
   2  -6   3 209.012 25.4725   2
  -2   6  -3 223.619 28.1760   4
   2  -6   3 191.115 19.5258   5
  -2   6  -4 1156.87 56.8810   4
   2  -6   4 1180.85 55.5039   2
  -2   6  -4 1179.78 43.4976   5
   2  -6   4 1183.27 42.5060   3
   2  -6   4 1275.13 44.0253   5
   2  -6   5 570.603 29.2549   5
   2  -6   5 522.445 28.5264   3
  -2   6  -5 655.103 47.2452   4
   2  -6   5 660.911 45.7132   2
  -2   6  -5 637.933 33.5756   5
   2  -6   6 631.786 45.8561   2
  -2   6  -6 692.316 51.7826   4
   2  -6   6 647.426 33.2490   3
   2  -6   6 654.933 33.2689   5
  -2   6  -6 655.140 36.2108   5
   2  -6   7 370.175 27.3048   3
  -2   6  -7 339.146 40.0819   4
  -2   6  -7 377.374 29.0202   3
  -2   6  -7 319.927 26.4786   5
   2  -6   7 363.686 26.9339   5
   2  -6   7 324.098 38.1991   2
  -2   6  -8 212.192 35.2880   4
  -2   6  -8 189.151 23.0382   5
   2  -6   8 76.7525 18.9225   3
   2  -6   8 220.991 33.0390   2
   2  -6   9 146.877 20.1961   3
  -2   6  -9 221.998 34.1278   4
  -2   6  -9 202.247 24.9385   5
   2  -6   9 193.287 33.2242   2
  -2   6 -10 864.745 62.8702   4
   2  -6  10 803.791 60.9007   2
  -2   6 -10 855.950 48.4383   5
   2  -6  10 837.098 47.7847   3
   2  -6  11 209.872 32.3130   3
  -2   6 -11 125.950 36.7261   4
   2  -6  11 159.761 36.6016   2
  -2   6 -11 171.997 29.1498   5
   2  -6  12 525.973 45.4964   3
  -2   6 -12 491.538 41.6304   5
  -2   6 -12 501.661 56.4065   4
   2  -6  12 502.333 54.7441   2
  -2   6 -13 266.252 44.9693   4
   2  -6  13 234.952 42.6823   2
   2  -6  13 255.480 35.8693   3
  -2   6 -13 231.741 32.6415   5
  -2   6 -14 514.065 58.5271   4
   2  -6  14 519.116 48.5061   3
   2  -6  14 506.460 59.0500   2
  -2   6 -14 534.744 47.9965   5
   2  -6  15 14.9163 32.0966   2
  -2   6 -15-39.3182 36.0267   4
   2  -6  15-13.0620 26.2382   3
  -2   6 -15-4.25773 21.9341   5
   2  -6  16 47.6628 28.0713   3
  -2   6 -16 45.8127 36.9416   4
   2  -6  16 65.6233 35.1151   2
   2  -6  17 164.578 48.4027   2
  -2   6 -17 138.425 45.7371   4
  -2   6 -18-34.9324 35.6430   4
   2  -6  18 9.92002 50.9127   2
   2  -6  18 60.7679 34.8785   6
   2  -6  19 136.786 61.1837   2
   2  -5 -18 1772.19 136.835   1
  -2   5  18 857.403 84.1588   6
  -2   5  17 219.907 47.0708   6
   2  -5 -17 280.077 66.5346   1
   2  -5 -16-30.0615 47.1069   1
  -2   5  16 38.1993 28.4363   6
  -2   5  15 923.041 78.2021   6
   2  -5 -15 934.279 84.6810   1
   2  -5 -14 3.82969 42.9309   1
  -2   5  14 98.5823 34.1001   6
  -2   5  13 2412.42 110.497   6
   2  -5 -13 2098.90 106.460   1
  -2   5  12 4958.69 151.501   6
   2  -5 -12 4455.07 146.176   1
  -2   5  11 128.705 32.9374   6
   2  -5 -11 125.391 32.3739   1
  -2   5  10 1502.28 81.2955   6
   2  -5 -10 1454.00 78.8450   1
  -2   5   9 3589.19 58.8347   2
  -2   5   9 4005.71 123.896   6
  -2   5   9 3492.43 58.6737   4
   2  -5  -9 3835.04 120.005   1
  -2   5   8 642.293 24.6202   4
   2  -5  -8 736.510 54.2806   1
  -2   5   8 668.692 25.1900   2
  -2   5   8 862.310 57.9174   6
  -2   5   7 1221.47 31.8577   4
  -2   5   7 1211.54 31.3410   2
   2  -5  -7 1283.16 67.1376   1
  -2   5   7 1405.32 68.6393   6
  -2   5   7 1233.87 32.0042   4
  -2   5   6 1299.58 32.6099   2
   2  -5  -6 1393.14 66.9172   1
  -2   5   6 1367.14 33.2881   4
  -2   5   6 1544.41 70.4456   6
  -2   5   5 3663.34 53.7810   2
  -2   5   5 3955.45 105.679   6
  -2   5   5 3604.93 53.7776   4
   2  -5  -5 3621.13 53.5851   2
   2  -5  -5 3776.50 100.773   1
  -2   5   4 12413.8 101.521   4
   2  -5  -4 12208.3 174.540   1
  -2   5   4 13074.0 181.004   6
  -2   5   4 12726.2 102.062   2
   2  -5  -4 12574.7 102.722   2
  -2   5   3 5200.10 69.7599   4
   2  -5  -3 5132.92 69.9383   2
  -2   5   3 5558.05 113.863   6
   2  -5  -3 5329.39 110.997   1
  -2   5   3 5365.59 70.3256   2
   2  -5  -2 4584.59 71.3732   2
   2  -5  -2 4603.93 71.5400   4
  -2   5   2 4587.88 70.6649   4
  -2   5   2 4712.17 71.2014   2
   2  -5  -2 4728.11 101.090   1
  -2   5   2 4743.94 101.402   6
  -2   5   1 1044.08 49.3363   6
  -2   5   1 1060.52 38.3304   4
   2  -5  -1 1050.46 37.8807   4
   2  -5  -1 1028.31 37.8025   2
  -2   5   1 1130.08 39.2276   2
   2  -5   0 5260.72 87.0075   5
  -2   5   0 5087.22 87.1475   4
  -2   5   0 5260.45 85.9306   2
  -2   5   0 5144.62 101.750   6
   2  -5   0 5090.71 84.1299   4
   2  -5   0 5267.45 103.415   6
   2  -5   0 5033.47 86.2941   2
   2  -5   1 351.417 29.6807   4
   2  -5   1 190.296 23.8402   6
  -2   5  -1 354.456 31.1182   4
   2  -5   1 392.446 30.4980   2
  -2   5  -1 204.310 29.5538   6
   2  -5   1 200.945 21.4777   5
  -2   5  -2 1055.17 48.3396   4
   2  -5   2 1115.47 38.2438   5
   2  -5   2 1111.56 48.1123   6
  -2   5  -2 1097.24 37.5007   5
   2  -5   2 1093.74 47.9367   4
   2  -5   2 1174.24 48.6951   2
  -2   5  -3 953.476 35.5165   5
  -2   5  -3 955.350 51.0649   4
   2  -5   3 1025.33 35.8863   5
   2  -5   3 1132.29 53.4398   2
   2  -5   3 1135.22 38.9925   3
  -2   5  -4 2237.03 75.2660   4
   2  -5   4 2151.27 74.3928   2
   2  -5   4 1914.25 46.3726   3
  -2   5  -4 2104.74 51.6464   5
   2  -5   4 1987.92 48.1407   5
  -2   5  -5 5646.36 85.6111   5
   2  -5   5 5276.48 80.8813   3
   2  -5   5 5265.60 80.3771   5
   2  -5   5 5395.28 116.337   2
  -2   5  -5 5523.60 120.860   4
   2  -5   6 4555.96 80.4704   5
  -2   5  -6 4498.35 79.7421   5
  -2   5  -6 4415.46 114.146   4
  -2   5  -6 4554.03 80.9171   3
   2  -5   6 4298.68 108.905   2
   2  -5   6 4464.69 78.8017   3
   2  -5   7 2419.86 62.5276   5
   2  -5   7 2134.15 57.9010   3
  -2   5  -7 2298.23 61.6192   5
   2  -5   7 2241.69 83.0490   2
  -2   5  -7 2371.48 62.4697   3
  -2   5  -7 2343.06 87.3379   4
  -2   5  -8 1901.68 60.0266   5
   2  -5   8 1817.27 77.8999   2
  -2   5  -8 1803.48 83.4498   4
  -2   5  -8 1940.64 60.6691   3
   2  -5   8 1858.65 59.6730   3
   2  -5   9 1194.67 53.1004   3
   2  -5   9 1032.17 62.5096   2
  -2   5  -9 1080.10 49.4143   5
  -2   5  -9 1020.83 65.2398   4
   2  -5  10 229.649 33.2920   3
  -2   5 -10 210.649 40.7071   4
   2  -5  10 206.370 38.1935   2
  -2   5 -10 187.163 29.4604   5
  -2   5 -11 111.221 24.8426   5
  -2   5 -11 132.087 35.5086   4
   2  -5  11 122.742 27.1222   3
   2  -5  11 94.6623 28.7367   2
   2  -5  12 20.8408 23.7277   2
  -2   5 -12 8.40728 23.7044   4
  -2   5 -12 22.2235 17.8507   5
   2  -5  12 29.0211 20.2912   3
  -2   5 -13 255.500 46.7396   4
   2  -5  13 238.149 38.6788   3
   2  -5  13 236.707 44.5010   2
  -2   5 -13 250.942 38.1992   5
  -2   5 -14 161.031 33.5680   5
   2  -5  14 156.442 39.5998   2
  -2   5 -14 170.886 42.5553   4
   2  -5  14 150.780 35.4071   3
  -2   5 -15 206.127 44.1303   4
   2  -5  15 154.600 34.2218   3
  -2   5 -15 204.806 36.3050   5
   2  -5  15 194.506 43.1920   2
  -2   5 -16 51.5655 35.7051   4
  -2   5 -16 53.5257 29.0997   5
   2  -5  16 49.3574 29.5332   3
   2  -5  16 45.9324 35.5769   2
   2  -5  17 27.2475 33.3785   6
  -2   5 -17 17.6679 32.5719   4
   2  -5  17-14.5582 37.6600   2
   2  -5  18 50.8651 37.8280   6
  -2   5 -18-1.63457 35.1726   4
   2  -5  18 64.0988 44.9949   2
   2  -5  19 148.054 43.1760   6
   2  -5  19 262.841 67.7542   2
  -2   4  19 1.49495 31.8523   6
  -2   4  18 313.354 55.3525   6
   2  -4 -18 610.439 83.8871   1
  -2   4  17 154.109 41.1293   6
   2  -4 -17 263.855 68.7225   1
  -2   4  16 138.293 38.0237   6
   2  -4 -16 119.800 50.8736   1
  -2   4  15-12.5131 26.3179   6
   2  -4 -15 7.51305 37.7431   1
   2  -4 -14 229.827 44.3311   1
  -2   4  14 299.961 44.7991   6
  -2   4  13 396.435 48.3718   6
   2  -4 -13 366.819 48.6074   1
   2  -4 -12 46.6757 34.2809   1
  -2   4  12 60.7250 24.8970   6
  -2   4  11 237.282 37.2143   6
   2  -4 -11 167.737 32.0869   1
  -2   4  10 1118.32 41.5253   2
   2  -4 -10 1145.90 67.3852   1
  -2   4  10 1146.44 42.3335   4
  -2   4  10 1172.48 66.9038   6
  -2   4   9 3040.11 63.7121   4
   2  -4  -9 2941.99 99.6649   1
  -2   4   9 3101.41 101.966   6
  -2   4   9 3083.26 63.3923   2
  -2   4   8 3871.03 109.846   6
  -2   4   8 3916.57 66.9995   2
  -2   4   8 3991.27 68.6918   4
   2  -4  -8 3778.54 107.703   1
   2  -4  -7 860.924 50.9924   1
  -2   4   7 939.007 31.4331   2
  -2   4   7 890.273 53.6557   6
  -2   4   6 1744.41 40.7418   2
  -2   4   6 1705.14 67.2051   6
   2  -4  -6 1643.65 66.3298   1
  -2   4   5 329.187 33.7435   6
   2  -4  -5 277.501 31.7947   1
  -2   4   5 318.678 18.7110   2
   2  -4  -4 75.2039 21.1741   1
   2  -4  -4 74.0480 12.1593   2
  -2   4   4 102.465 22.5108   6
  -2   4   4 80.8615 12.6281   4
  -2   4   4 72.3255 11.6554   2
   2  -4  -3 2044.40 44.3515   2
   2  -4  -3 2260.18 65.5527   3
   2  -4  -3 2073.05 64.4821   1
   2  -4  -3 2048.48 63.5356   6
  -2   4   3 2230.73 68.0185   6
  -2   4   3 2168.15 45.1684   2
  -2   4   3 2121.22 45.2542   4
   2  -4  -2 1787.64 52.0337   3
   2  -4  -2 1899.87 60.2697   6
  -2   4   2 1876.08 61.5067   6
   2  -4  -2 1798.68 43.6632   4
  -2   4   2 1832.77 44.5486   4
  -2   4   2 1980.13 45.4153   2
   2  -4  -2 1809.94 43.1779   2
   2  -4  -1 7249.71 111.336   6
  -2   4   1 6845.20 110.545   6
  -2   4   1 6707.08 87.4107   4
  -2   4   1 6833.79 87.0591   2
   2  -4  -1 6859.79 88.6719   4
   2  -4  -1 6765.40 87.5412   2
   2  -4   0 894.231 35.5647   2
  -2   4   0 952.340 36.8401   2
   2  -4   0 979.549 42.6802   6
   2  -4   0 911.928 35.2162   4
  -2   4   0 839.920 42.2757   6
  -2   4   0 934.593 36.8226   4
   2  -4   1 4105.81 61.7149   5
  -2   4  -1 4024.03 78.8330   4
  -2   4  -1 3807.15 82.9790   6
   2  -4   1 3993.05 82.5655   6
   2  -4   1 4214.12 78.9883   2
  -2   4  -1 4122.00 78.2613   2
   2  -4   1 4213.83 78.2322   4
   2  -4   2 7153.76 108.560   4
  -2   4  -2 6840.47 107.687   4
   2  -4   2 7211.23 111.182   6
   2  -4   2 7171.08 75.6836   5
   2  -4   2 7296.30 109.986   2
  -2   4  -2 7073.57 106.676   2
  -2   4  -2 7223.88 74.9056   5
   2  -4   3 8113.16 121.988   4
  -2   4  -3 8330.25 125.037   4
   2  -4   3 8284.95 78.7425   5
   2  -4   3 8394.98 78.9205   3
   2  -4   3 8141.76 123.311   2
  -2   4  -3 8330.40 80.7932   5
   2  -4   4 5792.72 69.2903   3
  -2   4  -4 5663.25 108.421   4
   2  -4   4 5851.49 69.9746   5
   2  -4   4 5722.34 107.486   2
  -2   4  -4 5714.07 70.7131   5
   2  -4   5 8981.70 95.2824   5
  -2   4  -5 8868.71 145.830   4
   2  -4   5 8889.78 93.9477   3
   2  -4   5 8571.85 140.165   2
  -2   4  -5 8891.93 95.6220   3
  -2   4  -5 8886.34 94.6922   5
  -2   4  -6 2242.42 77.0621   4
   2  -4   6 2137.27 51.5523   3
   2  -4   6 2219.10 74.6751   2
  -2   4  -6 2320.33 54.8670   3
  -2   4  -6 2264.62 53.7364   5
   2  -4   7 2017.31 57.3769   3
  -2   4  -7 2052.93 77.3987   4
  -2   4  -7 1887.48 54.2783   5
   2  -4   7 1761.67 71.2331   2
  -2   4  -7 1938.02 55.3072   3
   2  -4   8 2907.31 74.1469   3
  -2   4  -8 2921.61 98.5990   4
  -2   4  -8 2920.52 72.7404   5
   2  -4   8 2675.58 91.1296   2
  -2   4  -8 3003.00 73.5365   3
  -2   4  -9 2223.33 68.3691   5
   2  -4   9 2143.47 84.9843   2
  -2   4  -9 2263.68 90.7157   4
   2  -4   9 2212.87 70.2658   3
  -2   4 -10 217.709 36.0421   4
   2  -4  10 261.295 30.2988   3
  -2   4 -10 243.553 28.6296   5
   2  -4  10 232.382 33.3096   2
  -2   4 -11 1049.08 55.2320   5
   2  -4  11 1029.14 65.2764   2
  -2   4 -11 985.713 65.6535   4
   2  -4  11 1080.80 56.7239   3
  -2   4 -12 748.874 58.8377   4
   2  -4  12 706.920 49.6311   3
  -2   4 -12 687.488 47.5341   5
   2  -4  12 644.956 56.2460   2
   2  -4  13 74.8288 25.0009   3
  -2   4 -13 60.7230 22.9387   5
  -2   4 -13 67.3742 30.1641   4
   2  -4  13 66.9102 31.3413   2
   2  -4  14 1996.89 87.6021   3
  -2   4 -14 2043.76 102.576   4
   2  -4  14 1885.04 97.6367   2
  -2   4 -14 1880.80 84.5630   5
  -2   4 -15 3208.93 116.363   5
  -2   4 -15 3200.98 134.261   4
   2  -4  15 3124.25 114.826   3
   2  -4  15 3311.56 129.526   2
   2  -4  16 610.318 62.8188   2
  -2   4 -16 621.829 56.4362   5
   2  -4  16 817.486 71.0440   6
   2  -4  16 641.745 59.1408   3
  -2   4 -16 691.506 67.1286   4
   2  -4  17 1339.38 94.6929   2
  -2   4 -17 1364.96 94.5970   4
   2  -4  17 1455.09 95.8649   6
   2  -4  17 1433.38 87.1668   3
   2  -4  18 1104.78 88.3487   6
  -2   4 -18 953.985 82.8061   4
   2  -4  18 1030.17 85.6771   2
   2  -4  19 382.359 60.6415   6
   2  -4  20 33.8554 35.7273   6
  -2   3  19 25.9477 34.4850   6
   2  -3 -18-0.48250 31.2564   5
  -2   3  18 1.11345 29.3902   6
   2  -3 -17 349.487 63.7795   1
  -2   3  17 181.258 41.9272   6
   2  -3 -16 1139.35 89.4789   1
  -2   3  16 1084.75 81.8809   6
   2  -3 -15 627.140 72.0489   1
  -2   3  15 678.711 61.9134   6
   2  -3 -14 3525.60 135.068   1
  -2   3  14 3577.64 129.382   6
  -2   3  14 3496.45 141.601   3
   2  -3 -13 409.560 49.5418   1
  -2   3  13 438.134 47.3498   6
  -2   3  13 384.424 51.8883   3
  -2   3  12 2993.37 108.287   6
  -2   3  12 2821.45 117.508   3
  -2   3  11 10.4327 20.7346   6
   2  -3 -11-11.1861 23.2921   1
  -2   3  11 2.68793 25.1544   3
  -2   3  10 286.750 40.9475   3
  -2   3  10 251.064 25.3999   4
   2  -3 -10 245.101 33.3913   1
  -2   3  10 283.288 36.2587   6
  -2   3  10 273.811 24.9445   2
  -2   3   9 48.1757 14.4547   2
  -2   3   9 85.5503 27.6935   3
  -2   3   9 43.0165 14.6322   4
   2  -3  -9 43.2532 20.8897   1
  -2   3   9 69.7738 22.6509   6
  -2   3   8 32.2944 13.7106   2
  -2   3   8 59.1288 23.4725   3
  -2   3   8 34.1992 21.7245   6
   2  -3  -8 41.0831 21.8905   1
  -2   3   8 35.5333 13.7101   4
   2  -3  -7 28.0512 20.3681   1
  -2   3   7 33.5447 19.5361   6
  -2   3   7 26.7558 12.6264   2
  -2   3   7 28.7167 22.5058   3
  -2   3   6 4837.76 74.3438   2
  -2   3   6 4986.29 105.445   6
   2  -3  -6 4717.54 102.683   1
  -2   3   6 4583.99 108.838   3
  -2   3   5 3180.82 80.1617   6
   2  -3  -5 3169.16 79.9141   6
  -2   3   5 3138.20 56.7032   2
   2  -3  -5 3011.62 76.7727   1
  -2   3   5 3059.13 82.9140   3
  -2   3   5 3211.56 79.7865   1
  -2   3   4 1455.58 54.7874   3
  -2   3   4 1506.60 39.0693   2
   2  -3  -4 1546.82 54.8815   6
  -2   3   4 1554.65 54.9736   6
   2  -3  -4 1487.73 57.8586   3
   2  -3  -4 1507.00 52.5526   1
   2  -3  -4 1486.94 39.4736   2
  -2   3   3 1085.03 34.6642   4
   2  -3  -3 1064.00 45.6963   1
   2  -3  -3 1171.69 47.6537   3
  -2   3   3 1151.44 45.7612   3
  -2   3   3 1152.58 34.5187   2
   2  -3  -3 1202.76 46.0858   6
  -2   3   3 1155.58 46.0687   6
   2  -3  -3 1140.41 35.3679   2
   2  -3  -2 344.214 24.6191   3
  -2   3   2 397.295 30.1132   6
   2  -3  -2 368.965 27.9148   6
   2  -3  -2 290.375 19.0931   2
  -2   3   2 329.333 21.7532   4
  -2   3   2 374.163 22.4121   2
   2  -3  -1 931.691 32.3323   3
  -2   3   1 930.699 34.1869   2
   2  -3  -1 921.629 33.4821   2
  -2   3   1 965.606 40.0812   6
   2  -3  -1 1016.34 40.5124   6
   2  -3  -1 917.479 32.3437   4
  -2   3   1 840.102 33.9248   4
  -2   3   0 1173.48 44.3598   6
   2  -3   0 1262.03 43.2025   6
   2  -3   0 1222.32 38.4629   4
   2  -3   0 1235.76 39.5674   2
  -2   3   0 1247.71 40.7447   2
  -2   3   0 1209.88 41.5118   4
  -2   3  -1 1701.31 49.2592   4
   2  -3   1 1664.12 51.0056   4
   2  -3   1 1737.20 51.0351   2
  -2   3  -1 1781.96 50.2225   2
   2  -3   1 1635.64 30.9484   5
   2  -3   1 1633.10 51.7726   6
   2  -3   2 635.633 17.4361   5
  -2   3  -2 644.746 36.2178   4
  -2   3  -2 674.849 35.0705   2
   2  -3   2 618.214 17.4895   3
   2  -3   2 692.836 36.4974   2
  -2   3  -2 596.605 17.0694   5
   2  -3   2 649.015 35.2102   4
  -2   3  -3 3166.15 73.7998   4
   2  -3   3 3050.94 37.8073   5
   2  -3   3 2987.96 36.8983   3
   2  -3   3 3178.74 73.0046   2
  -2   3  -3 3001.25 39.2281   5
   2  -3   3 3107.08 72.4992   4
  -2   3  -3 3196.83 73.4192   2
  -2   3  -4 3477.32 49.0613   3
  -2   3  -4 3529.65 48.8815   5
   2  -3   4 3452.67 80.7051   2
   2  -3   4 3413.56 47.9532   3
   2  -3   4 3554.57 80.7803   1
  -2   3  -4 3438.97 83.1204   4
   2  -3   4 3451.13 80.5312   4
   2  -3   5 4568.66 66.0076   3
  -2   3  -5 4641.11 65.4737   3
  -2   3  -5 4618.51 98.8068   4
  -2   3  -5 4469.38 64.5729   5
   2  -3   5 4376.98 95.7595   2
  -2   3  -6 3035.00 60.9198   3
  -2   3  -6 3129.51 86.3642   4
  -2   3  -6 3011.73 60.9556   5
   2  -3   6 2917.68 83.0393   2
   2  -3   6 3237.49 64.8590   3
  -2   3  -7 283.957 31.6827   4
   2  -3   7 277.776 24.1294   3
   2  -3   7 248.288 30.7048   2
  -2   3  -7 330.029 24.0783   5
  -2   3  -7 303.451 23.8022   3
  -2   3  -8 417.800 29.7512   5
  -2   3  -8 492.133 41.3338   4
   2  -3   8 435.822 31.2514   3
  -2   3  -8 451.862 31.4235   3
   2  -3   8 403.191 36.8685   2
   2  -3   9 1.09703 15.6026   3
  -2   3  -9-4.09152 18.8105   4
   2  -3   9-3.77179 18.6886   2
  -2   3  -9 4.60995 14.5012   5
  -2   3 -10 15.0936 15.3468   5
  -2   3 -10 22.2230 21.7174   4
   2  -3  10 20.8916 20.2572   2
   2  -3  10 29.0628 16.7266   3
  -2   3 -10-2.13506 23.6274   1
  -2   3 -11-16.7300 27.4115   1
  -2   3 -11-9.98147 20.5589   4
   2  -3  11-1.84277 20.0904   2
  -2   3 -11-10.7961 19.2872   5
   2  -3  11-20.1770 18.5451   3
   2  -3  12 1327.43 73.9949   2
   2  -3  12 1349.31 67.1667   3
  -2   3 -12 1380.29 67.4461   5
  -2   3 -12 931.024 57.6284   1
  -2   3 -12 1252.66 77.4459   4
   2  -3  13 73.0506 26.6726   3
  -2   3 -13 54.1815 26.2893   4
   2  -3  13 87.9388 32.8900   2
  -2   3 -13 30.4372 21.0777   5
  -2   3 -14 882.499 68.6138   4
   2  -3  14 858.696 61.0859   3
   2  -3  14 849.288 66.2982   2
  -2   3 -14 783.880 59.6456   5
   2  -3  15 353.077 54.9970   6
  -2   3 -15 274.173 46.6697   4
   2  -3  15 224.628 37.6247   3
  -2   3 -15 189.060 35.5287   5
   2  -3  15 291.460 46.7441   2
  -2   3 -16 266.843 47.0580   4
   2  -3  16 278.637 48.0174   6
   2  -3  16 342.569 46.4527   3
  -2   3 -16 197.528 38.1283   5
   2  -3  16 227.848 45.5500   2
   2  -3  17 332.101 54.7523   6
  -2   3 -17 337.636 49.7279   4
   2  -3  17 350.500 53.9569   2
   2  -3  18 39.5006 33.6549   6
   2  -3  19 420.504 61.9440   6
   2  -3  20 315.079 57.6158   6
  -2   2  19 359.005 54.3119   6
   2  -2 -19 327.503 61.9351   5
   2  -2 -18 237.843 51.6829   5
  -2   2  18 306.005 50.2597   6
   2  -2 -18 431.549 67.1255   1
  -2   2  17 95.3460 36.7350   6
  -2   2  17 4.01105 38.7736   3
   2  -2 -17 54.8007 35.4658   5
   2  -2 -17 145.583 48.4370   1
   2  -2 -16 143.699 38.9482   5
  -2   2  16 158.171 38.9705   6
  -2   2  16 156.493 42.3174   3
   2  -2 -16 258.904 58.6659   1
  -2   2  15 739.778 72.5449   3
  -2   2  15 909.686 68.6624   6
   2  -2 -15 1043.81 78.4398   1
  -2   2  14 145.214 42.0092   3
   2  -2 -14 180.682 40.7576   1
  -2   2  14 182.829 38.1005   6
  -2   2  13 117.331 28.5464   6
  -2   2  13 129.817 37.3448   3
   2  -2 -13 64.0712 29.8624   1
  -2   2  12 1479.78 75.2909   6
   2  -2 -12 1315.95 73.1652   1
  -2   2  12 1521.90 84.3754   3
  -2   2  11 76.5186 22.6334   6
  -2   2  11 94.6507 31.9495   3
   2  -2 -11 75.9535 24.3234   1
  -2   2  10 1459.98 76.1169   3
   2  -2 -10 1469.83 67.1757   1
  -2   2  10 1478.71 68.2419   6
  -2   2   9 1543.97 73.6211   3
   2  -2  -9 1425.50 62.6683   1
  -2   2   9 1514.85 54.7957   4
  -2   2   9 1526.26 65.0197   6
  -2   2   8 953.008 56.3939   3
  -2   2   8 927.009 41.6180   4
  -2   2   8 964.835 49.6728   6
   2  -2  -8 860.887 47.4529   1
  -2   2   8 940.614 41.2828   2
  -2   2   7 611.997 46.8166   3
  -2   2   7 603.930 40.5965   6
   2  -2  -7 600.110 39.1264   1
  -2   2   7 561.642 31.9003   2
  -2   2   6 5059.70 96.3930   1
   2  -2  -6 4894.46 94.5572   6
  -2   2   6 5081.73 82.2450   2
  -2   2   6 4873.98 106.601   3
   2  -2  -6 4733.94 93.4209   1
  -2   2   6 4854.12 95.0890   6
   2  -2  -5 1029.04 42.6438   1
  -2   2   5 1081.59 37.1080   2
  -2   2   5 1104.82 43.9982   6
  -2   2   5 1105.13 43.9450   1
  -2   2   5 1070.71 48.2369   3
   2  -2  -5 1091.55 43.8232   6
  -2   2   4 519.144 25.6686   2
   2  -2  -4 533.227 30.2942   6
  -2   2   4 538.618 33.8378   3
   2  -2  -4 526.078 30.1150   1
  -2   2   4 517.252 31.4286   6
   2  -2  -4 490.530 25.8491   2
   2  -2  -4 549.577 35.1910   3
  -2   2   3 1439.23 44.5583   6
  -2   2   3 1460.82 39.4864   2
   2  -2  -3 1369.79 43.3863   1
   2  -2  -3 1417.87 47.4695   3
   2  -2  -3 1377.93 43.6041   6
   2  -2  -3 1431.98 40.0786   2
  -2   2   3 1461.09 47.0943   3
  -2   2   2 197.099 20.8382   6
  -2   2   2 206.430 20.3274   3
   2  -2  -2 270.865 25.1080   3
   2  -2  -2 163.098 19.2662   6
   2  -2  -2 280.139 21.7188   2
  -2   2   2 198.385 19.2717   2
  -2   2   1 10806.2 91.1932   3
   2  -2  -1 10784.7 106.388   2
   2  -2  -1 10391.4 90.8341   3
  -2   2   1 11155.6 104.579   2
  -2   2   1 10561.9 108.039   6
   2  -2  -1 10399.4 106.547   6
  -2   2   1 11142.9 105.331   4
   2  -2   0 2179.80 50.3621   2
   2  -2   0 2234.74 33.8672   3
  -2   2   0 2054.82 51.1406   2
   2  -2   0 2202.02 51.5115   6
  -2   2   0 2055.54 51.4194   4
   2  -2   0 2133.14 50.3679   4
  -2   2   0 2276.46 33.7901   3
   2  -2   1 2574.69 56.4846   2
  -2   2  -1 2562.89 58.1308   2
  -2   2  -1 2478.99 58.3573   4
   2  -2   1 2639.05 57.2585   4
   2  -2   2 2678.32 62.6720   4
  -2   2  -2 2722.85 62.1696   4
  -2   2  -2 2777.95 61.7781   2
   2  -2   2 2723.68 62.3133   2
   2  -2   3 230.014 11.1536   3
  -2   2  -3 268.060 25.1750   4
   2  -2   3 254.553 25.7232   2
  -2   2  -3 223.601 10.5745   3
   2  -2   3 222.525 24.0404   4
  -2   2  -3 228.426 10.6442   5
   2  -2   3 235.687 24.1200   1
  -2   2  -3 224.527 24.2332   2
   2  -2   4 278.727 26.7089   4
  -2   2  -4 296.734 27.3862   4
   2  -2   4 258.294 26.5908   1
  -2   2  -4 285.959 15.8312   5
  -2   2  -4 293.057 16.3449   3
   2  -2   4 270.183 26.7330   2
  -2   2  -4 301.741 27.0293   2
   2  -2   4 301.061 16.4909   3
  -2   2  -5 9.11542 18.5250   4
   2  -2   5 12.3905 16.5398   2
  -2   2  -5-1.74651 10.2278   5
  -2   2  -5-5.55360 11.0090   3
   2  -2   5 0.95223 15.9198   4
   2  -2   5 18.4371 11.5363   3
  -2   2  -5 11.1921 20.2423   1
   2  -2   6 345.410 24.7795   3
  -2   2  -6 344.540 31.8530   4
  -2   2  -6 321.133 33.1759   1
   2  -2   6 333.339 32.6268   2
  -2   2  -6 328.309 24.0723   3
   2  -2   7 9461.42 121.543   3
  -2   2  -7 9712.36 151.126   4
  -2   2  -7 9245.07 119.701   3
  -2   2  -7 8935.41 148.297   1
   2  -2   7 8911.11 143.944   2
  -2   2  -8 622.734 36.8197   3
  -2   2  -8 561.509 43.3020   4
   2  -2   8 552.738 40.8856   2
  -2   2  -8 425.673 36.2206   1
   2  -2   8 588.069 36.6420   3
   2  -2   9 163.532 24.3311   3
  -2   2  -9 144.007 28.8870   1
  -2   2  -9 174.808 24.9041   5
  -2   2  -9 174.281 30.4350   4
   2  -2   9 149.726 25.8076   2
  -2   2 -10 664.044 44.3418   5
  -2   2 -10 649.962 51.1559   1
   2  -2  10 635.125 46.8216   2
   2  -2  10 660.815 43.8279   3
  -2   2 -10 678.491 49.5412   4
  -2   2 -11 26.5331 21.1334   4
  -2   2 -11-20.8569 28.0886   1
  -2   2 -11 29.2590 18.7050   5
   2  -2  11-2.18693 17.8968   3
   2  -2  11 4.74012 19.7449   2
   2  -2  12 67.0356 24.1882   3
  -2   2 -12 47.2036 25.0784   4
   2  -2  12 59.9748 25.2681   2
  -2   2 -12 39.2409 22.4110   5
  -2   2 -13-6.64698 31.3986   1
  -2   2 -13 26.3906 24.9322   4
   2  -2  13 82.8901 34.0360   6
  -2   2 -13 27.8185 22.7881   5
   2  -2  13 15.5679 22.6176   2
   2  -2  13 70.6364 25.6934   3
  -2   2 -14 2807.62 106.293   5
   2  -2  14 2662.24 104.862   2
  -2   2 -14 2738.17 110.965   4
   2  -2  14 2729.41 119.776   6
   2  -2  14 2729.50 104.906   3
  -2   2 -14 2206.02 99.0172   1
   2  -2  15 684.759 68.7248   6
  -2   2 -15 459.315 48.7538   1
   2  -2  15 582.422 57.3552   2
  -2   2 -15 650.077 59.6229   4
  -2   2 -15 613.790 56.5742   5
   2  -2  16 468.150 58.4220   6
  -2   2 -16 442.228 51.7745   5
  -2   2 -16 437.365 52.3391   4
  -2   2 -16 449.529 58.4004   1
   2  -2  16 436.720 54.4934   2
   2  -2  17 677.044 70.5849   6
  -2   2 -17 563.991 63.7084   1
  -2   2 -17 778.125 69.1027   4
  -2   2 -17 707.765 66.3795   5
  -2   2 -18 108.444 59.2646   1
   2  -2  18 198.493 45.6505   6
   2  -2  19 746.472 79.0640   6
  -2   2 -19-246.854 121.210   1
  -2   1  19 558.719 72.5473   3
   2  -1 -19 493.911 70.8062   5
  -2   1  18 2724.97 141.961   3
  -2   1  18 2628.46 121.997   6
   2  -1 -18 2586.82 135.627   5
  -2   1  17 564.830 59.6832   6
   2  -1 -17 543.952 65.4317   1
  -2   1  17 457.813 62.7940   3
   2  -1 -17 463.297 62.9175   5
  -2   1  16 972.619 71.1710   6
   2  -1 -16 957.738 82.5238   5
   2  -1 -16 1203.79 79.9382   1
  -2   1  16 1017.35 81.9437   3
  -2   1  15 500.011 51.2843   6
  -2   1  15 521.257 58.7130   3
   2  -1 -15 440.501 53.9117   5
  -2   1  14 174.769 32.3378   6
   2  -1 -14 173.336 40.5661   5
  -2   1  14 121.970 36.1020   3
   2  -1 -14 206.644 43.7624   1
   2  -1 -13 2456.23 99.3037   1
   2  -1 -13 2461.52 110.463   5
  -2   1  13 2381.09 106.328   3
  -2   1  13 2622.79 97.8897   6
  -2   1  12 1251.26 65.6934   6
   2  -1 -12 1248.08 68.7223   1
  -2   1  12 1237.88 76.5129   3
  -2   1  11 254.010 39.7316   3
  -2   1  11 313.975 33.9479   6
   2  -1 -11 220.768 34.7903   1
   2  -1 -10 352.301 34.5924   1
  -2   1  10 432.550 45.1721   3
  -2   1  10 389.142 35.3137   6
   2  -1  -9 3546.38 91.3195   1
  -2   1   9 3710.63 111.117   3
  -2   1   9 3669.19 92.1442   6
  -2   1   8 1561.81 56.1592   4
  -2   1   8 1522.52 68.9592   3
   2  -1  -8 1505.50 56.8027   1
  -2   1   8 1570.98 58.0158   6
  -2   1   7 2349.35 82.0251   3
   2  -1  -7 2386.59 66.4629   1
  -2   1   7 2486.15 66.9934   1
  -2   1   7 2519.81 67.0397   6
   2  -1  -7 2474.88 66.4360   6
   2  -1  -6 7975.32 108.874   6
  -2   1   6 7802.01 133.144   3
   2  -1  -6 7902.80 107.953   1
  -2   1   6 8093.65 109.611   1
  -2   1   6 8249.46 110.861   6
   2  -1  -5 3439.44 80.6099   3
   2  -1  -5 3184.09 63.6079   1
  -2   1   5 3385.84 65.1643   1
  -2   1   5 3359.69 82.7640   3
  -2   1   5 3399.66 65.9970   6
   2  -1  -5 3306.97 65.2429   6
  -2   1   5 3400.37 69.4732   2
   2  -1  -4 2965.10 70.0364   3
   2  -1  -4 2834.53 55.1316   6
  -2   1   4 2848.46 56.6111   6
   2  -1  -4 2709.10 54.8022   1
  -2   1   4 2873.17 69.3331   3
  -2   1   4 2905.53 61.2467   2
  -2   1   3 310.647 22.8203   2
  -2   1   3 309.989 23.8666   3
  -2   1   3 327.134 20.7074   6
   2  -1  -3 363.631 27.5170   3
   2  -1  -3 331.528 20.1353   1
   2  -1  -3 349.234 23.9737   2
   2  -1  -3 322.382 19.9583   6
   2  -1  -2 9863.38 100.961   2
   2  -1  -2 9522.81 95.1638   3
  -2   1   2 9857.05 100.259   2
  -2   1   2 9682.57 96.3600   3
  -2   1   2 9513.26 88.1390   6
   2  -1  -2 9175.33 88.0645   6
   2  -1  -1 2925.66 56.7864   2
  -2   1   1 3112.90 56.1678   2
  -2   1   1 3030.65 45.7011   3
   2  -1  -1 2986.48 46.1548   5
   2  -1  -1 2860.11 49.1681   6
   2  -1  -1 2975.03 45.5146   3
  -2   1   0 13.1971 13.8376   4
  -2   1   0 22.0271 13.5778   2
   2  -1   0 19.2843 13.1412   2
   2  -1   0 37.6647 13.9546   4
  -2   1   0 31.0203 7.57307   5
   2  -1   0 33.1548 8.21732   5
   2  -1   0 32.4568 8.64318   3
  -2   1   0 21.9666 7.48361   3
  -2   1  -1 488.420 28.7814   2
   2  -1   1 521.203 28.5333   2
   2  -1   1 504.372 29.1896   4
  -2   1  -1 505.648 30.0340   4
  -2   1  -2 501.963 29.6806   4
   2  -1   2 527.179 30.1381   1
  -2   1  -2 505.463 30.0384   2
   2  -1   2 499.760 28.2571   2
   2  -1   2 514.832 28.9540   4
   2  -1   3 5882.80 94.3252   1
   2  -1   3 5878.47 90.2700   2
  -2   1  -3 5822.27 58.4114   3
  -2   1  -3 6030.12 95.7335   1
  -2   1  -3 5998.15 91.2558   2
  -2   1  -3 5830.30 90.2743   4
   2  -1   3 5673.12 90.9622   4
  -2   1  -4 5796.75 71.4040   3
   2  -1   4 5708.89 94.4838   2
   2  -1   4 5970.31 102.271   1
  -2   1  -4 5838.12 103.096   1
  -2   1  -4 5921.08 95.2325   4
  -2   1  -4 5822.78 95.9141   2
   2  -1   4 5823.75 94.8091   4
   2  -1   5 6832.39 109.022   4
  -2   1  -5 6965.45 90.4697   3
   2  -1   5 6897.87 109.332   2
  -2   1  -5 7065.20 119.058   1
  -2   1  -5 6997.08 112.322   4
  -2   1  -6 2109.75 71.4757   1
  -2   1  -6 2105.51 55.4472   3
   2  -1   6 1903.38 62.4820   2
  -2   1  -6 2032.85 63.5330   4
  -2   1  -7 38.4079 16.3128   3
  -2   1  -7 6.05424 31.1315   1
  -2   1  -7 69.7221 20.3068   4
   2  -1   7 54.1583 19.1199   2
   2  -1   7 27.3773 16.3790   3
  -2   1  -8 62.3460 33.5054   1
   2  -1   8 35.6863 19.8387   2
  -2   1  -8 37.4028 22.1037   4
   2  -1   8 40.7995 20.3118   3
   2  -1   9 371.173 32.9474   3
  -2   1  -9 350.633 40.0449   1
   2  -1   9 358.918 33.9976   2
  -2   1  -9 376.502 37.1034   4
   2  -1  10 295.772 31.5923   3
  -2   1 -10 293.245 40.6181   1
  -2   1 -10 299.437 35.4220   4
   2  -1  10 260.644 32.3675   2
  -2   1 -11 616.260 53.7806   1
  -2   1 -11 624.568 48.6170   4
   2  -1  11 546.607 43.6631   2
   2  -1  12 1679.46 92.0963   6
  -2   1 -12 1415.72 74.0681   4
  -2   1 -12 1668.24 86.1911   1
   2  -1  12 1437.38 70.8657   2
   2  -1  13 18.6524 30.0528   6
  -2   1 -13-2.39726 33.3326   1
  -2   1 -13 16.7436 22.3568   4
   2  -1  13-9.45539 22.0039   2
   2  -1  14 92.7256 36.6264   6
  -2   1 -14-12.6073 58.7453   1
  -2   1 -14 75.7750 28.0351   4
   2  -1  14 43.5616 26.1693   2
  -2   1 -14 78.6503 30.1654   5
   2  -1  15 22.5831 27.7847   6
  -2   1 -15-13.7992 40.1022   1
  -2   1 -15 70.8632 25.5414   4
   2  -1  15 65.5626 28.6592   2
  -2   1 -15 82.4287 32.0153   5
  -2   1 -16 75.6629 30.5552   5
  -2   1 -16 83.2656 42.0936   1
   2  -1  16 86.6181 36.0080   6
  -2   1 -16 96.6419 31.2132   4
   2  -1  17 584.579 66.8579   6
  -2   1 -17 591.156 62.8362   5
  -2   1 -17 501.005 68.8051   1
   2  -1  18-21.1556 34.4539   6
  -2   1 -18-133.801 62.2778   1
  -2   1 -19-450.559 115.881   1
   2  -1  19 50.2574 33.8337   6
  -2   0  19 180.317 49.9179   3
   2   0 -19 257.568 56.0763   5
   2   0 -18 297.999 53.7863   5
  -2   0  18 345.528 47.7157   6
  -2   0  18 347.636 58.5450   3
   2   0 -17 53.8013 33.1875   5
  -2   0  17 122.901 34.5743   6
  -2   0  17 122.743 40.1732   3
  -2   0  16 111.958 30.9052   6
   2   0 -16 174.772 44.5923   1
   2   0 -16 93.8802 37.6024   5
  -2   0  16 94.1159 38.6828   3
   2   0 -15 295.516 46.3644   5
  -2   0  15 317.763 40.9419   6
  -2   0  15 348.108 53.1449   3
   2   0 -14 300.962 44.7132   1
  -2   0  14 257.957 46.5310   3
  -2   0  14 216.483 34.5670   6
   2   0 -14 200.806 41.2158   5
   2   0 -13 1630.83 76.2836   1
   2   0 -13 1645.77 89.1433   5
  -2   0  13 1593.94 87.0047   3
  -2   0  13 1632.36 74.4650   6
   2   0 -12 481.987 50.6570   5
   2   0 -12 446.623 42.0955   1
  -2   0  12 489.988 41.1761   6
  -2   0  12 494.766 50.8064   3
  -2   0  11 292.559 31.5948   6
  -2   0  11 282.403 39.5030   3
   2   0 -11 258.691 31.0084   1
   2   0 -11 269.724 37.9959   5
  -2   0  10 158.227 34.6945   3
  -2   0  10 186.809 27.0573   6
   2   0 -10 197.427 28.7368   1
   2   0 -10 182.514 32.7526   5
  -2   0   9 425.150 34.6293   6
  -2   0   9 477.525 47.5444   3
   2   0  -9 487.540 46.9994   5
   2   0  -9 438.823 36.7782   1
  -2   0   8 1537.08 67.1202   3
  -2   0   8 1659.34 54.7685   6
  -2   0   8 1614.32 53.7600   1
   2   0  -8 1634.27 70.5515   5
   2   0  -8 1466.34 52.5857   1
   2   0  -7 1921.69 53.5143   6
  -2   0   7 2079.32 54.9964   1
  -2   0   7 2094.70 72.4090   3
   2   0  -7 1949.56 54.5774   1
  -2   0   7 2084.02 55.0479   6
   2   0  -7 1923.30 70.2906   5
   2   0  -6 670.636 29.8517   6
  -2   0   6 678.205 30.2837   6
  -2   0   6 661.617 41.8965   3
   2   0  -6 662.386 40.0835   5
  -2   0   6 701.064 31.1649   1
   2   0  -6 643.880 29.9328   1
  -2   0   5 14.4467 10.8367   1
   2   0  -5 20.1914 11.0072   6
   2   0  -5 9.88810 10.8809   1
   2   0  -5 28.5165 18.5100   3
   2   0  -5 22.3990 18.2573   5
  -2   0   5 15.7755 17.1124   3
  -2   0   5 20.0301 11.7348   6
   2   0  -4 3198.98 70.8478   5
  -2   0   4 3044.80 47.4158   6
   2   0  -4 2919.25 45.7868   6
   2   0  -4 2983.53 45.6697   1
   2   0  -4 3212.57 69.9678   3
  -2   0   4 3078.24 70.5594   3
  -2   0   4 3197.42 67.5890   2
   2   0  -3 287.660 14.8362   1
  -2   0   3 352.860 26.7632   3
   2   0  -3 304.144 15.4114   6
  -2   0   3 329.777 16.3767   6
   2   0  -3 376.931 26.6488   5
  -2   0   3 344.211 25.1678   5
   2   0  -3 357.029 26.0808   3
  -2   0   3 360.633 26.3762   2
   2   0  -2 11273.2 106.366   5
  -2   0   2 11070.1 111.118   2
   2   0  -2 10008.2 73.4775   6
  -2   0   2 10878.7 104.118   5
   2   0  -2 11111.6 106.502   3
  -2   0   2 10668.3 103.873   3
   2   0  -2 10715.2 110.758   2
   2   0  -1 39340.5 206.643   2
  -2   0   1 40837.0 209.037   2
  -2   0   1 39363.0 174.911   5
   2   0  -1 40568.2 178.045   5
   2   0  -1 41006.8 178.484   3
  -2   0   1 39626.1 175.741   3
   2   0   0 47361.8 197.655   1
   2   0   0 47943.7 219.846   2
  -2   0   0 48686.4 222.123   2
   2   0   0 46673.0 172.432   5
  -2   0  -1 6323.14 81.7938   1
   2   0   1 6011.84 80.6578   2
  -2   0  -1 5551.06 58.7333   5
  -2   0  -1 6041.31 82.4188   2
   2   0   1 6059.42 80.8122   4
   2   0   1 6118.55 81.0192   1
   2   0   1 5704.74 58.9727   5
  -2   0  -1 5916.58 82.2201   4
  -2   0  -2 782.535 36.3837   1
   2   0   2 759.378 35.0963   1
  -2   0  -2 817.578 32.7433   2
   2   0   2 754.118 31.5888   2
  -2   0  -2 767.536 25.0188   5
   2   0   2 770.895 32.1328   4
  -2   0  -2 789.949 32.9441   4
  -2   0  -3 2306.15 55.5254   4
   2   0   3 2276.02 63.1297   1
   2   0   3 2281.05 55.1250   4
   2   0   3 2239.14 55.3570   2
  -2   0  -3 2341.54 61.9676   1
  -2   0  -3 2370.64 56.5294   2
   2   0   4 160.775 19.9132   4
   2   0   4 157.169 24.1164   1
  -2   0  -4 172.269 20.6845   4
   2   0   4 177.653 20.5146   2
  -2   0  -4 174.186 24.0830   1
  -2   0  -4 183.246 20.8164   2
  -2   0  -4 186.941 18.5506   3
  -2   0  -5 91.3077 22.5993   1
  -2   0  -5 108.060 20.4850   4
   2   0   5 86.4857 18.9076   2
   2   0   5 111.312 19.6565   4
  -2   0  -5 108.681 19.6196   2
  -2   0  -5 106.552 18.4345   3
   2   0   6 109.831 22.4082   4
   2   0   6 115.908 21.3019   2
  -2   0  -6 109.579 22.2674   4
  -2   0  -6 71.1673 25.4178   1
  -2   0  -6 87.1517 21.5255   3
  -2   0  -7 3778.75 105.781   1
   2   0   7 3823.00 86.6572   2
  -2   0  -7 4113.41 90.2110   4
  -2   0  -8 6527.30 139.348   1
   2   0   8 5960.03 113.145   2
  -2   0  -8 6220.77 117.685   4
  -2   0  -9 2838.72 99.0077   1
   2   0   9 2699.43 80.4019   2
   2   0   9 2731.88 99.9104   6
  -2   0  -9 2970.03 86.4175   4
   2   0  10 108.170 22.8149   2
  -2   0 -10 73.4908 20.6657   4
   2   0  10 98.8610 31.9771   6
  -2   0 -10 70.3716 30.8850   1
   2   0  11 1146.15 71.7014   6
  -2   0 -11 1138.28 60.2873   4
   2   0  11 1060.22 56.5406   2
  -2   0 -11 1104.38 70.6335   1
   2   0  12 136.208 38.7469   6
  -2   0 -12 165.647 29.0413   4
   2   0  12 134.608 26.8507   2
  -2   0 -12 259.282 47.1013   1
  -2   0 -13 1832.33 95.5643   1
  -2   0 -13 1747.35 81.6603   4
   2   0  13 1691.14 75.7874   2
   2   0  13 1799.86 99.3058   6
  -2   0 -14 355.048 64.8793   1
  -2   0 -14 252.545 37.8196   4
   2   0  14 180.514 32.6477   2
   2   0  14 218.842 40.2882   6
  -2   0 -15 502.580 62.8175   1
  -2   0 -15 469.234 48.5195   4
   2   0  15 556.519 63.9481   6
   2   0  16 332.407 54.4689   6
  -2   0 -16 367.920 58.8412   1
  -2   0 -17 484.942 69.8068   1
   2   0  17 496.381 64.0968   6
  -2   0 -17 569.779 62.6565   5
  -2   0 -18 1553.42 111.960   1
   2   0  18 1486.31 107.680   6
  -2   0 -18 1551.24 99.9240   5
  -2  -1  19 180.735 50.7407   3
   2   1 -19 123.086 45.4074   5
   2   1 -18 50.3808 35.5706   5
  -2  -1  18 30.1165 35.1735   3
  -2  -1  17 38.4701 32.8806   3
  -2  -1  17 37.8384 29.1229   6
   2   1 -17 22.1372 32.0563   5
   2   1 -16 24.3171 29.5088   5
  -2  -1  16 17.5371 21.9258   6
  -2  -1  16 26.3751 32.8125   3
   2   1 -16 114.076 36.7762   1
  -2  -1  15 28.6777 31.7588   3
  -2  -1  15-0.17909 21.5793   6
   2   1 -15 8.19543 28.6425   5
  -2  -1  14 186.785 30.3738   6
   2   1 -14 194.148 40.0494   5
  -2  -1  14 218.023 42.2195   3
   2   1 -14 303.001 39.8813   1
   2   1 -13 2351.52 86.8602   1
  -2  -1  13 2193.40 81.8765   6
  -2  -1  13 2156.35 101.219   3
   2   1 -13 2122.84 99.6458   5
   2   1 -12 835.438 49.3966   1
  -2  -1  12 872.792 64.3095   3
   2   1 -12 845.471 62.4674   5
  -2  -1  12 831.357 48.6915   6
   2   1 -11 3.72399 21.7750   5
  -2  -1  11 35.8741 24.5441   3
  -2  -1  11 27.4428 15.6922   6
   2   1 -11-2.24443 17.4149   1
  -2  -1  10-7.64283 23.2409   3
  -2  -1  10-12.9799 16.5845   6
   2   1 -10 28.8616 16.0378   1
   2   1 -10 5.03224 20.0164   5
  -2  -1   9 2.73436 12.6880   6
  -2  -1   9-12.3394 15.4022   1
  -2  -1   9-15.7140 25.0870   3
   2   1  -9 38.4515 23.6644   1
   2   1  -9 5.77688 19.7892   5
  -2  -1   8 801.774 35.0948   1
   2   1  -8 805.179 50.7775   5
   2   1  -8 826.800 38.4537   1
  -2  -1   8 845.553 36.2844   6
  -2  -1   8 777.250 50.0925   3
   2   1  -7 5810.77 120.264   5
  -2  -1   7 5892.73 82.3660   6
   2   1  -7 5676.44 81.7113   1
  -2  -1   7 5756.76 120.326   3
  -2  -1   7 6029.42 82.0816   1
   2   1  -6 8397.08 87.4893   1
  -2  -1   6 8991.43 87.3487   6
  -2  -1   6 8998.10 137.093   3
  -2  -1   6 9059.09 86.8363   1
   2   1  -6 8886.40 137.603   5
   2   1  -5 7081.60 117.373   3
  -2  -1   5 6953.49 64.6263   1
   2   1  -5 6794.74 64.4104   1
  -2  -1   5 7029.75 64.0226   6
  -2  -1   5 6928.89 112.978   3
  -2  -1   5 7024.60 114.110   5
   2   1  -5 7044.83 114.481   5
  -2  -1   4 4426.68 84.0494   5
   2   1  -4 4479.96 85.7783   5
  -2  -1   4 4295.50 84.5023   3
   2   1  -4 4525.44 85.1570   3
  -2  -1   3 66.5840 19.6595   2
   2   1  -3 76.0903 19.2449   5
  -2  -1   3 95.8043 17.3992   5
   2   1  -3 79.8289 20.5025   3
  -2  -1   3 69.6388 18.6995   3
  -2  -1   2 17.3234 13.5328   5
   2   1  -2 24.2722 15.8425   5
   2   1  -2 37.2938 16.7644   2
  -2  -1   2 21.0084 16.0640   2
  -2  -1   2 28.1462 15.6801   3
   2   1  -2 42.5686 16.7456   3
   2   1  -1 152.076 18.6851   2
  -2  -1   1 175.392 20.6924   2
   2   1  -1 176.932 14.3293   1
   2   1  -1 169.611 18.4473   5
  -2  -1   1 198.595 14.2306   1
  -2  -1   1 168.310 18.4874   5
  -2  -1   1 171.524 19.4471   3
   2   1  -1 160.492 18.3176   3
   2   1   0 360.230 23.7733   2
  -2  -1   0 381.144 24.4980   2
   2   1   0 338.928 21.6823   1
  -2  -1   0 341.779 21.2632   5
  -2  -1   0 362.996 20.2331   1
   2   1   0 343.254 21.8626   5
   2   1   1 7135.05 87.7472   2
  -2  -1  -1 6960.78 89.2307   1
  -2  -1  -1 7308.11 88.9454   2
   2   1   1 7160.86 93.1910   1
  -2  -1  -1 6967.18 83.4855   5
   2   1   1 7108.28 83.2651   5
  -2  -1  -2 1545.55 49.5335   1
  -2  -1  -2 1578.92 42.5061   5
   2   1   2 1512.57 42.6579   2
  -2  -1  -2 1557.87 43.2298   2
   2   1   2 1652.46 50.9878   1
  -2  -1  -2 1612.28 43.8202   4
  -2  -1  -3 957.843 36.1056   4
  -2  -1  -3 983.036 36.1579   2
  -2  -1  -3 978.889 43.4702   1
   2   1   3 939.500 34.9495   2
   2   1   3 875.449 34.3214   4
  -2  -1  -3 1018.87 37.2488   5
   2   1   3 985.658 46.1478   1
  -2  -1  -4 196.216 19.9400   4
   2   1   4 188.275 19.4697   4
  -2  -1  -4 190.142 20.3433   2
   2   1   4 193.915 19.5384   2
  -2  -1  -4 210.560 27.5000   1
  -2  -1  -5 3250.88 67.8621   4
   2   1   5 3220.30 68.8572   2
  -2  -1  -5 3186.67 74.3625   3
  -2  -1  -5 3191.82 68.2266   2
  -2  -1  -5 3189.11 87.0946   1
   2   1   5 3155.36 68.6993   4
  -2  -1  -6 8327.31 128.080   3
  -2  -1  -6 8401.96 114.878   4
  -2  -1  -6 7919.61 142.029   1
   2   1   6 7880.99 112.660   2
   2   1   6 8501.25 150.030   6
   2   1   6 7977.18 113.197   4
  -2  -1  -7 257.134 25.0533   4
   2   1   7 291.003 36.6046   6
   2   1   7 226.380 24.2189   2
   2   1   7 252.048 25.1667   4
  -2  -1  -7 208.753 30.5921   1
   2   1   8 64.9238 24.1202   6
  -2  -1  -8 103.145 29.7865   1
   2   1   8 86.1711 18.6567   2
  -2  -1  -8 118.392 20.8608   4
   2   1   9 249.494 36.9258   6
   2   1   9 204.839 24.9356   2
  -2  -1  -9 229.133 26.5529   4
  -2  -1  -9 218.137 36.6176   1
   2   1  10 717.108 56.7978   6
  -2  -1 -10 688.546 57.5247   1
  -2  -1 -10 738.193 45.2750   4
   2   1  10 652.022 41.5278   2
   2   1  11 2582.00 109.198   6
  -2  -1 -11 2633.70 85.4399   4
   2   1  11 2367.17 79.2190   2
  -2  -1 -11 2316.55 103.897   1
   2   1  12 118.085 32.5993   6
  -2  -1 -12 128.940 26.0856   4
   2   1  12 133.967 24.9292   2
  -2  -1 -12 186.875 43.4545   1
  -2  -1 -13 117.047 40.1965   1
   2   1  13 32.7350 28.0779   6
   2   1  13 72.9015 21.6728   2
  -2  -1 -13 23.0802 21.4715   4
  -2  -1 -14 374.579 39.8423   4
  -2  -1 -14 333.490 59.1046   1
   2   1  14 255.265 47.8744   6
   2   1  15 24.3150 29.4907   6
  -2  -1 -15 74.7157 43.2720   1
  -2  -1 -16 76.5462 51.5218   1
   2   1  16-11.5941 30.1800   6
   2   1  17-14.2701 35.2307   6
  -2  -1 -17 72.4788 57.3650   1
  -2  -1 -18 275.610 53.6552   5
   2   1  18 157.507 46.9555   6
  -2  -1 -18 269.607 86.2203   1
  -2  -2  20 554.467 72.8595   3
   2   2 -20 444.373 64.5573   5
  -2  -2  19 107.341 43.8442   3
   2   2 -19 37.5796 34.7685   5
  -2  -2  18-16.6296 33.9705   3
   2   2 -18 13.4266 27.7921   5
   2   2 -17 112.213 39.5188   5
  -2  -2  17 127.455 44.3119   3
  -2  -2  16 254.134 37.4670   6
   2   2 -16 263.149 51.0022   5
  -2  -2  16 236.709 47.4102   3
   2   2 -15 699.807 51.1997   1
   2   2 -15 1097.51 78.9922   5
  -2  -2  15 1135.00 85.1098   3
  -2  -2  15 1171.97 64.6461   6
  -2  -2  14 2726.14 92.2484   6
   2   2 -14 2687.48 88.0877   1
   2   2 -14 2679.05 115.743   5
  -2  -2  14 2675.28 118.011   3
   2   2 -13 2742.90 84.2782   1
  -2  -2  13 2810.81 88.0251   6
   2   2 -13 2599.82 111.213   5
  -2  -2  13 2805.77 115.469   3
   2   2 -12 106.673 30.3744   5
   2   2 -12 161.306 25.0995   1
  -2  -2  12 144.518 23.0301   6
  -2  -2  12 144.544 32.3762   3
   2   2 -11 10.4966 16.8098   1
  -2  -2  11 16.1547 26.9691   3
  -2  -2  11 10.9595 14.3034   6
   2   2 -11-2.32091 20.9846   5
   2   2 -10 835.736 41.5361   1
  -2  -2  10 905.935 42.2981   1
   2   2 -10 908.390 60.7997   5
  -2  -2  10 893.642 41.7310   6
  -2  -2  10 930.190 60.3609   3
   2   2  -9 44.7390 17.3646   1
  -2  -2   9 38.5704 26.5945   3
  -2  -2   9 28.5857 13.8091   6
  -2  -2   9 34.0451 15.6901   1
   2   2  -9 46.7441 23.6202   5
  -2  -2   8 10292.4 109.452   6
   2   2  -8 9879.83 106.046   1
   2   2  -8 10571.5 170.439   5
  -2  -2   8 10483.3 167.467   3
  -2  -2   8 10340.2 109.408   1
   2   2  -7 1309.51 35.5670   1
   2   2  -7 1279.80 57.5801   5
  -2  -2   7 1241.72 56.9405   3
  -2  -2   7 1300.55 34.5557   1
  -2  -2   7 1276.13 34.2086   6
  -2  -2   6 959.243 25.6083   6
  -2  -2   6 974.780 50.2285   3
   2   2  -6 998.420 51.0438   5
  -2  -2   6 939.771 25.0886   1
   2   2  -6 896.401 23.9978   1
  -2  -2   5 3007.31 78.3754   3
   2   2  -5 3118.52 81.3613   3
   2   2  -5 3150.25 80.1328   5
  -2  -2   4 1746.32 57.4764   3
  -2  -2   4 1735.89 56.8901   5
   2   2  -4 1796.25 59.0190   5
   2   2  -4 1938.86 59.1568   3
  -2  -2   3 1726.16 53.6250   5
   2   2  -3 1755.02 54.2043   5
  -2  -2   3 1653.37 55.3781   3
   2   2  -3 1736.94 54.8154   3
   2   2  -2 2344.68 62.0042   3
  -2  -2   2 2546.35 33.6258   1
   2   2  -2 2421.10 61.1899   5
  -2  -2   2 2237.90 57.4120   5
   2   2  -2 2512.83 33.9174   6
  -2  -2   2 2261.80 58.4187   3
   2   2  -2 2360.96 32.9000   1
  -2  -2   2 2461.61 60.7240   2
  -2  -2   1 4332.53 75.9037   2
  -2  -2   1 4459.74 57.4105   1
   2   2  -1 4250.41 56.0343   6
   2   2  -1 4448.07 57.3997   1
  -2  -2   1 3863.14 72.1903   5
   2   2  -1 4160.41 76.3329   5
  -2  -2   1 3821.73 72.0437   3
  -2  -2   0 6388.39 86.9045   2
   2   2   0 6553.59 81.0669   1
  -2  -2   0 6590.35 84.1067   1
  -2  -2   0 5996.86 89.9601   5
   2   2   0 6252.38 86.3466   2
   2   2   0 6155.79 79.1822   6
   2   2   0 6184.94 90.9528   5
   2   2   1 1166.69 41.8995   6
  -2  -2  -1 1167.09 38.2482   2
   2   2   1 1227.89 43.5653   1
  -2  -2  -1 1276.67 43.6877   1
   2   2   1 1192.07 38.1319   2
  -2  -2  -1 1131.64 41.8320   5
   2   2   1 1121.21 41.0702   5
   2   2   2 932.986 43.6825   1
   2   2   2 950.582 34.2782   2
  -2  -2  -2 994.550 43.9980   1
  -2  -2  -2 862.559 37.8214   5
  -2  -2  -2 975.322 35.0459   2
  -2  -2  -2 848.203 33.4473   4
   2   2   2 866.746 41.0382   6
  -2  -2  -3 525.553 26.9660   2
   2   2   3 558.244 28.6980   2
  -2  -2  -3 647.528 42.3931   1
   2   2   3 604.462 40.1131   1
   2   2   3 604.210 39.3002   6
  -2  -2  -3 515.703 27.2900   4
  -2  -2  -3 595.905 35.6334   5
  -2  -2  -4 2231.14 52.3853   4
   2   2   4 2136.86 70.5863   6
  -2  -2  -4 2139.61 72.6344   1
  -2  -2  -4 2239.51 52.7787   2
   2   2   4 2250.87 52.3961   2
   2   2   4 2152.19 51.7522   4
   2   2   5 67.6394 16.0685   4
   2   2   5 88.2499 27.8945   6
  -2  -2  -5 66.6729 16.0676   4
  -2  -2  -5 80.5174 27.7154   1
  -2  -2  -5 48.8404 15.7828   2
   2   2   5 56.1229 14.5193   2
  -2  -2  -6 1056.61 42.9159   2
  -2  -2  -6 1070.28 66.8043   1
  -2  -2  -6 1185.04 45.4536   4
   2   2   6 1102.91 44.7143   2
   2   2   6 1150.77 66.8743   6
   2   2   6 1039.07 44.3723   4
  -2  -2  -7 1253.96 69.6533   1
   2   2   7 891.197 38.9241   2
   2   2   7 860.698 57.3389   6
  -2  -2  -7 916.331 39.5800   4
   2   2   7 926.858 39.9850   4
   2   2   8 2463.18 66.9648   2
   2   2   8 2553.41 96.7915   6
  -2  -2  -8 2659.31 69.5762   4
  -2  -2  -8 2628.10 96.4742   1
   2   2   8 2533.12 67.5267   4
  -2  -2  -9 283.097 39.4801   1
  -2  -2  -9 312.303 27.7048   4
   2   2   9 276.357 39.5667   6
   2   2   9 257.626 26.0969   2
  -2  -2 -10 15.9158 15.1411   4
   2   2  10-6.60818 22.0609   6
   2   2  10 22.0810 15.1577   2
  -2  -2 -10 11.5422 26.3944   1
   2   2  11 747.518 66.1683   6
  -2  -2 -11 699.591 44.7773   4
   2   2  11 692.441 43.8646   2
   2   2  12 882.853 71.2888   6
  -2  -2 -12 902.416 51.9517   4
   2   2  12 806.660 48.4559   2
  -2  -2 -12 748.790 69.8016   1
   2   2  13 52.5828 33.1757   6
  -2  -2 -13 71.7056 23.2106   4
   2   2  14 416.756 55.0625   6
  -2  -2 -14 377.586 63.5664   1
   2   2  15 19.4423 30.4299   6
  -2  -2 -15 98.9874 47.3900   1
  -2  -2 -16 68.7713 55.6682   1
   2   2  16 61.5641 33.6729   6
   2   2  17 9.86969 34.4018   6
  -2  -2 -17 44.9469 64.5878   1
  -2  -3  20-0.24669 38.0710   3
   2   3 -20 49.1356 38.7321   5
  -2  -3  19 39.1818 39.8849   3
   2   3 -19 68.2560 37.7329   5
   2   3 -18 67.5223 33.6030   5
  -2  -3  18 142.593 44.0771   3
   2   3 -17 43.0421 33.3749   5
  -2  -3  17 3.04517 32.7843   3
  -2  -3  16 87.2047 39.0688   3
   2   3 -16 40.1112 30.8031   5
   2   3 -15-8.98615 25.9473   5
  -2  -3  15 25.0148 19.0413   6
  -2  -3  15 29.4913 32.1155   3
  -2  -3  14 372.086 35.6632   6
  -2  -3  14 368.930 49.8912   3
   2   3 -14 303.692 31.2222   1
   2   3 -14 327.445 44.6534   5
   2   3 -13-24.8428 22.0665   1
  -2  -3  13 35.7607 32.2180   3
   2   3 -13-3.34945 26.3714   5
  -2  -3  13-3.18108 15.6005   6
  -2  -3  12 267.799 28.5331   6
   2   3 -12 248.486 27.2873   1
   2   3 -12 236.026 37.6886   5
  -2  -3  12 274.842 40.6752   3
   2   3 -11-28.6182 18.7658   1
  -2  -3  11 4.84748 14.4792   6
  -2  -3  11-8.25894 23.3178   3
   2   3 -11 17.1615 21.3259   5
  -2  -3  11 6.36851 15.0740   1
  -2  -3  10 147.064 19.1516   1
  -2  -3  10 127.260 30.6841   3
  -2  -3  10 140.841 18.9692   6
   2   3 -10 148.852 29.6052   5
   2   3 -10 127.130 17.7199   1
  -2  -3   9 591.044 47.2495   3
   2   3  -9 605.402 47.4612   5
  -2  -3   9 542.594 28.4823   1
  -2  -3   9 543.221 27.6308   6
  -2  -3   8 446.289 22.6705   6
   2   3  -8 445.334 40.5728   5
  -2  -3   8 448.064 22.9938   1
  -2  -3   8 455.404 39.6682   3
  -2  -3   7 106.639 13.5075   6
  -2  -3   7 125.975 34.3397   3
  -2  -3   7 95.1796 13.6464   1
   2   3  -7 155.360 34.1683   5
   2   3  -6 33.3427 22.0467   5
  -2  -3   6 4.06051 23.8015   3
  -2  -3   6 16.6220 6.21047   6
  -2  -3   5 334.130 33.4072   3
   2   3  -5 337.182 32.6037   5
   2   3  -4 49.9054 21.2078   5
  -2  -3   4 22.4676 17.8240   5
  -2  -3   4 18.3129 22.2046   3
   2   3  -4 62.3827 23.7781   3
  -2  -3   3 155.582 23.2782   5
  -2  -3   3 109.389 5.57570   6
   2   3  -3 179.546 24.9540   3
  -2  -3   3 94.2538 7.87558   1
   2   3  -3 208.928 26.8747   5
  -2  -3   3 184.497 26.4826   3
   2   3  -3 178.608 10.4547   6
   2   3  -2 144.483 23.2615   5
  -2  -3   2 125.940 9.77587   6
  -2  -3   2 170.281 12.2306   1
   2   3  -2 142.415 13.1207   1
  -2  -3   2 122.639 20.7062   5
  -2  -3   2 118.894 22.6359   3
   2   3  -2 136.756 12.7118   6
   2   3  -1-4.14836 17.6338   5
   2   3  -1 3.03795 11.7476   6
  -2  -3   1-18.2775 10.9061   6
  -2  -3   1 9.79585 9.18766   1
   2   3  -1 1.22904 11.5206   1
  -2  -3   1-17.2278 15.4991   2
  -2  -3   1 4.98907 15.5178   5
  -2  -3   0-11.2731 10.8775   6
  -2  -3   0-4.73167 15.4142   5
  -2  -3   0 31.4132 15.5407   2
   2   3   0-1.81285 13.3750   6
  -2  -3   0-11.0661 14.7034   1
   2   3   0-1.81247 16.4239   5
   2   3   0 10.3990 14.7508   1
  -2  -3  -1 537.833 28.7377   2
  -2  -3  -1 448.518 25.0079   1
   2   3   1 522.050 27.0211   2
   2   3   1 516.690 31.8863   1
  -2  -3  -1 503.940 32.8365   5
   2   3   1 525.353 31.7835   6
   2   3   1 550.609 34.1621   5
   2   3   2 5310.76 78.1999   2
   2   3   2 5279.02 99.0749   6
   2   3   2 5354.77 99.3613   1
  -2  -3  -2 5438.26 78.9871   2
  -2  -3  -2 5296.94 100.579   1
  -2  -3  -2 5469.78 100.436   5
   2   3   3 2032.83 48.2383   2
  -2  -3  -3 2111.74 48.7361   2
  -2  -3  -3 2113.51 69.0816   1
  -2  -3  -3 2127.31 49.3819   4
   2   3   3 2100.36 68.7370   6
  -2  -3  -4 1501.29 42.5841   2
   2   3   4 1447.73 62.1634   6
   2   3   4 1499.03 42.0087   2
  -2  -3  -4 1505.78 64.1895   1
  -2  -3  -4 1536.13 42.5738   4
  -2  -3  -5 4720.79 74.8463   2
   2   3   5 4568.66 112.918   6
   2   3   5 4679.90 74.6623   2
  -2  -3  -5 4258.74 118.863   1
  -2  -3  -5 4777.33 74.5912   4
  -2  -3  -6 89.0571 14.7059   4
   2   3   6 94.8802 25.4324   6
   2   3   6 109.540 16.8745   2
  -2  -3  -6 106.942 29.2520   1
  -2  -3  -6 84.1282 13.8735   2
  -2  -3  -7-1.56796 25.6466   1
  -2  -3  -7 33.5978 13.2944   4
   2   3   7 27.8758 13.3359   2
   2   3   7 5.97534 11.1151   4
   2   3   7 23.3510 23.8375   6
  -2  -3  -8 397.812 44.6999   1
  -2  -3  -8 448.533 28.7463   4
   2   3   8 408.135 44.9844   6
   2   3   8 379.342 26.5810   2
   2   3   8 408.557 27.0128   4
  -2  -3  -9 677.672 57.7840   1
   2   3   9 639.900 34.1452   2
  -2  -3  -9 683.997 36.4503   4
   2   3   9 611.838 56.3081   6
   2   3   9 672.636 34.8950   4
   2   3  10 1672.41 91.6644   6
  -2  -3 -10 1687.91 90.5288   1
   2   3  10 1704.45 56.7907   2
  -2  -3 -10 1707.37 59.3220   4
   2   3  11 64.6983 31.2731   6
  -2  -3 -11 79.2348 18.4659   4
   2   3  11 51.7408 16.1339   2
  -2  -3 -12 327.063 54.8719   1
  -2  -3 -12 267.977 29.3391   4
   2   3  12 242.591 44.9212   6
  -2  -3 -13 812.108 85.4950   1
   2   3  13 412.502 53.9376   6
  -2  -3 -14 108.480 45.2089   1
   2   3  14-1.19207 33.1981   6
   2   3  15 243.403 50.2956   6
  -2  -3 -15 300.138 58.9445   1
  -2  -3 -16 251.317 72.1550   1
   2   3  16 17.0424 38.9565   6
  -2  -3 -17 241.197 78.0184   1
   2   3  17 118.927 42.1470   6
  -2  -4  20 232.966 56.0782   3
   2   4 -20 304.253 59.0471   5
  -2  -4  19 221.216 52.9788   3
   2   4 -19 206.646 49.9933   5
  -2  -4  18-4.91184 37.5097   3
   2   4 -18-37.1021 34.7953   5
  -2  -4  17 211.721 50.0076   3
   2   4 -17 166.741 38.1522   5
   2   4 -16 353.442 51.5872   5
  -2  -4  16 291.086 50.8712   3
  -2  -4  15 1099.58 58.0089   6
   2   4 -15 1046.21 78.4457   5
  -2  -4  15 986.004 77.0219   3
  -2  -4  14 972.181 51.0499   6
  -2  -4  14 816.367 67.8823   3
   2   4 -14 825.108 68.2907   5
  -2  -4  13 8.99113 15.9936   6
  -2  -4  13 21.0342 25.2140   3
   2   4 -13 12.6476 24.5449   5
   2   4 -12 76.4713 26.2164   5
  -2  -4  12 87.0878 29.9573   3
  -2  -4  12 86.9755 18.2599   6
  -2  -4  11 2001.14 88.2872   3
  -2  -4  11 1829.39 57.5116   1
   2   4 -11 1987.55 88.8583   5
  -2  -4  11 2028.00 58.7054   6
  -2  -4  10 1432.87 74.6043   3
  -2  -4  10 1493.25 46.4839   1
  -2  -4  10 1466.38 46.1505   6
   2   4 -10 1463.23 73.9239   5
  -2  -4   9 726.507 51.4803   3
   2   4  -9 700.312 50.7195   5
  -2  -4   9 650.703 28.1243   6
  -2  -4   9 756.784 31.3350   1
  -2  -4   8 2523.77 48.6891   1
  -2  -4   8 2435.12 87.6835   3
   2   4  -8 2349.98 85.9969   5
  -2  -4   7 80.6555 9.57372   6
  -2  -4   7 64.4729 8.08738   1
   2   4  -7 126.022 27.2630   5
  -2  -4   7 118.482 27.1652   3
  -2  -4   6 111.864 9.31715   6
  -2  -4   6 100.567 7.73036   1
  -2  -4   6 138.738 27.7572   3
   2   4  -6 144.112 26.4060   5
  -2  -4   5 3.70747 5.08878   6
  -2  -4   5 2.70173 5.40037   1
  -2  -4   5 24.5407 19.6730   3
   2   4  -5 21.8612 20.0394   5
   2   4  -4 247.323 13.7258   6
  -2  -4   4 246.082 13.7029   1
   2   4  -4 267.859 30.2771   5
  -2  -4   4 235.182 13.0624   6
  -2  -4   4 252.699 31.5833   3
   2   4  -3 1326.70 56.1497   5
   2   4  -3 1368.63 33.4242   6
  -2  -4   3 1573.17 36.1431   6
  -2  -4   3 1311.86 55.3689   3
  -2  -4   3 1466.97 34.6536   1
   2   4  -2 469.935 24.0607   1
  -2  -4   2 509.832 24.5926   6
   2   4  -2 429.382 35.7732   5
   2   4  -2 452.132 23.9646   6
  -2  -4   2 402.492 33.8699   3
  -2  -4   2 510.737 24.2461   1
  -2  -4   1 3123.81 62.1455   6
   2   4  -1 3003.48 61.9090   6
  -2  -4   1 3048.96 69.1418   2
   2   4  -1 3065.21 62.2366   1
  -2  -4   1 2980.05 61.0990   1
   2   4  -1 3112.88 80.8140   5
   2   4   0 871.596 44.6333   5
  -2  -4   0 904.118 37.4626   6
   2   4   0 829.789 38.7196   1
   2   4   0 879.189 38.4801   6
  -2  -4   0 910.161 37.4508   1
  -2  -4   0 847.877 35.4762   2
  -2  -4  -1 621.228 32.6665   2
  -2  -4  -1 557.896 35.3786   6
  -2  -4  -1 389.990 25.2813   1
   2   4   1 465.428 32.4648   1
   2   4   1 511.960 33.8225   6
   2   4   1 465.121 35.5043   5
  -2  -4  -2 1801.72 47.7104   2
  -2  -4  -2 1680.75 60.5147   1
   2   4   2 1717.22 61.4451   6
  -2  -4  -3 1209.96 38.9760   2
  -2  -4  -3 1176.33 55.1427   1
   2   4   3 1098.22 53.5729   6
  -2  -4  -3 1144.56 37.6115   4
   2   4   3 1155.48 37.4689   2
   2   4   4 2085.23 48.3022   2
   2   4   4 2058.37 76.3124   6
  -2  -4  -4 2198.89 49.6708   2
  -2  -4  -4 1639.71 63.1203   1
  -2  -4  -4 2108.66 48.6868   4
   2   4   5 2526.29 52.9767   2
   2   4   5 2423.86 87.1040   6
  -2  -4  -5 2528.21 53.1235   2
  -2  -4  -5 2468.24 92.1526   1
  -2  -4  -5 2554.40 53.2143   4
   2   4   6 413.212 23.3008   2
  -2  -4  -6 421.050 43.8556   1
   2   4   6 382.229 40.5012   6
  -2  -4  -6 402.414 22.8377   4
  -2  -4  -6 405.615 23.0131   2
  -2  -4  -7 83.8771 13.4707   4
  -2  -4  -7 94.4573 32.2533   1
   2   4   7 97.2009 14.9170   2
   2   4   7 92.0652 27.6794   6
  -2  -4  -8 126.937 16.7019   4
   2   4   8 126.969 15.9130   2
  -2  -4  -8 125.981 32.7898   1
   2   4   8 119.536 29.7112   6
  -2  -4  -9 15.4085 12.3141   4
  -2  -4  -9 19.3733 28.3411   1
   2   4   9 4.48556 24.4931   6
   2   4   9 6.34216 10.6176   2
  -2  -4 -10 10.2492 12.0352   4
   2   4  10 30.0455 14.8832   2
   2   4  10 1.39169 26.5073   6
  -2  -4 -11 1826.03 57.6517   4
  -2  -4 -11 1860.47 104.919   1
   2   4  11 1906.68 102.699   6
   2   4  12 1263.52 87.5947   6
  -2  -4 -12 1405.35 95.9757   1
  -2  -4 -13 387.401 61.8999   1
   2   4  13 112.008 38.5605   6
   2   4  14 436.121 61.4286   6
  -2  -4 -14 436.561 63.7142   1
  -2  -4 -15 782.232 84.9439   1
   2   4  15 734.762 75.6162   6
   2   4  16 124.764 40.9236   6
  -2  -4 -16 254.490 69.5102   1
  -2  -5  20 171.612 51.6852   3
   2   5 -20 187.446 50.8888   5
   2   5 -19 11.9635 32.9234   5
  -2  -5  19-27.8168 38.6943   3
   2   5 -18-0.43436 34.2342   5
  -2  -5  18 33.3580 38.7271   3
   2   5 -17 166.339 42.6522   5
  -2  -5  17 175.929 44.8348   3
  -2  -5  16 390.170 56.9747   3
   2   5 -16 405.189 56.0207   5
   2   5 -15 78.7803 33.7531   5
  -2  -5  15 42.3571 29.4187   3
  -2  -5  14 4186.29 98.8862   6
  -2  -5  14 3892.52 140.138   3
   2   5 -14 4145.47 145.016   5
  -2  -5  13 2529.81 109.691   3
   2   5 -13 2401.17 105.762   5
  -2  -5  13 2508.62 71.7910   6
  -2  -5  12 1036.85 68.8565   3
  -2  -5  12 986.783 44.1040   6
   2   5 -12 987.862 66.9511   5
  -2  -5  12 987.553 44.8714   1
  -2  -5  11 216.925 21.0208   6
  -2  -5  11 251.910 24.1725   1
  -2  -5  11 243.047 38.4737   3
   2   5 -11 216.440 35.7957   5
  -2  -5  10 369.286 25.5141   1
   2   5 -10 329.941 40.1174   5
  -2  -5  10 386.040 45.0018   3
   2   5  -9 102.882 27.7443   5
  -2  -5   9 111.504 13.9927   6
  -2  -5   9 90.5295 26.3299   3
  -2  -5   9 103.460 13.9144   1
  -2  -5   8 116.556 29.5848   3
  -2  -5   8 161.237 14.5594   6
  -2  -5   8 74.2644 9.45447   1
   2   5  -8 156.992 28.5507   5
  -2  -5   7 393.181 17.6650   1
  -2  -5   7 424.730 41.2560   3
   2   5  -7 459.989 40.0057   5
  -2  -5   7 410.626 19.4011   6
   2   5  -6 307.215 34.3435   5
  -2  -5   6 308.435 16.2991   6
  -2  -5   6 268.735 34.5642   3
   2   5  -5 139.445 26.7564   5
  -2  -5   5 146.387 12.8892   1
  -2  -5   5 145.493 12.8254   6
  -2  -5   5 139.031 27.5296   3
  -2  -5   4 121.301 13.8878   6
   2   5  -4 126.429 25.4596   5
   2   5  -4 117.938 14.0049   6
  -2  -5   4 135.363 14.6308   1
  -2  -5   4 115.342 27.1596   3
  -2  -5   3 737.953 45.8222   3
   2   5  -3 700.741 45.6621   5
   2   5  -3 683.073 29.5534   6
  -2  -5   3 920.619 34.8815   1
  -2  -5   3 895.645 33.8075   6
   2   5  -2 3224.76 65.9299   6
  -2  -5   2 3373.36 66.5489   6
   2   5  -2 3188.69 65.4401   1
   2   5  -2 3306.08 90.5845   5
  -2  -5   2 3351.32 66.6541   1
   2   5  -1 5370.18 92.0879   6
  -2  -5   1 5378.67 91.3521   1
   2   5  -1 5417.58 91.5411   1
  -2  -5   1 5578.53 92.2194   6
   2   5  -1 5476.64 116.827   5
   2   5   0 724.108 39.7288   1
  -2  -5   0 722.857 37.1967   1
   2   5   0 697.945 38.4245   6
  -2  -5   0 728.259 37.4231   6
   2   5   0 741.540 45.6066   5
  -2  -5   0 636.188 32.8070   2
  -2  -5  -1 196.816 19.9332   2
  -2  -5  -1 171.415 25.2817   1
   2   5   1 174.915 24.4550   6
   2   5   1 157.791 27.8101   5
  -2  -5  -2 52.0651 13.1153   2
   2   5   2 87.8470 22.2395   6
   2   5   3 734.725 47.6972   6
  -2  -5  -3 811.440 32.5008   2
  -2  -5  -3 480.573 40.6197   1
  -2  -5  -4 4611.26 70.9110   2
   2   5   4 4408.70 115.752   6
  -2  -5  -4 4550.84 116.101   1
  -2  -5  -4 4637.36 71.3103   4
   2   5   5 134.845 14.5941   2
  -2  -5  -5 92.1137 27.3130   1
  -2  -5  -5 130.274 14.4577   4
   2   5   5 96.5836 24.9526   6
  -2  -5  -5 136.987 14.2262   2
   2   5   6 12.7705 8.59320   2
  -2  -5  -6 15.3813 8.73207   4
   2   5   6 22.0528 22.8381   6
  -2  -5  -6 11.5800 8.85375   2
  -2  -5  -6 30.5896 24.9596   1
  -2  -5  -7 44.9788 28.7403   1
   2   5   7-9.61564 23.7987   6
   2   5   7 21.0491 9.14331   2
  -2  -5  -7 30.2492 9.68032   4
   2   5   8 34.1628 26.6545   6
   2   5   8 38.1749 10.3320   2
  -2  -5  -8 42.6493 10.7969   4
  -2  -5  -8 43.8357 30.9534   1
  -2  -5  -9 89.8377 13.7419   4
   2   5   9 67.9912 26.1238   6
  -2  -5  -9 91.7435 37.7549   1
   2   5  10 129.037 36.4657   6
  -2  -5 -10 188.163 44.0822   1
  -2  -5 -11 1076.92 84.0004   1
   2   5  11 1281.04 88.0561   6
  -2  -5 -12 967.275 87.7686   1
   2   5  12 643.679 66.8696   6
  -2  -5 -13 598.328 71.8292   1
   2   5  13 425.475 61.8943   6
  -2  -5 -14 910.541 88.9646   1
   2   5  14 876.518 82.4061   6
   2   5  15 20.7263 36.8469   6
  -2  -5 -15 153.093 69.4236   1
   2   5  16 102.542 47.7798   6
  -2  -6  20 990.897 95.5915   3
  -2  -6  19 817.358 84.8659   3
   2   6 -19 961.459 86.0599   5
  -2  -6  18 671.932 75.1374   3
   2   6 -18 708.736 73.7351   5
  -2  -6  17 631.416 69.4312   3
   2   6 -17 555.663 64.0861   5
  -2  -6  16 1100.18 85.0335   3
   2   6 -16 1080.92 84.4608   5
   2   6 -15 1337.53 89.1697   5
  -2  -6  15 1377.44 89.5982   3
   2   6 -14 2169.30 106.943   5
  -2  -6  14 2177.88 106.476   3
  -2  -6  13 2146.11 64.9637   6
  -2  -6  13 2040.86 101.308   3
   2   6 -13 2109.58 102.112   5
  -2  -6  12 2647.51 66.7078   6
  -2  -6  12 2776.95 110.774   3
   2   6 -12 2725.89 112.048   5
  -2  -6  11 4910.42 86.5957   1
   2   6 -11 4735.64 139.950   5
  -2  -6  11 4597.13 138.329   3
  -2  -6  10 183.620 35.0680   3
   2   6 -10 176.361 34.1286   5
  -2  -6  10 148.057 16.6688   6
  -2  -6  10 149.315 16.1579   1
  -2  -6   9 162.629 12.7205   1
  -2  -6   9 187.233 32.2050   3
  -2  -6   9 193.055 16.6389   6
   2   6  -9 201.893 32.6352   5
  -2  -6   8 1288.07 35.9669   1
   2   6  -8 1378.34 69.9442   5
  -2  -6   8 1369.12 38.0134   6
  -2  -6   8 1382.93 71.1967   3
   2   6  -7 1189.66 66.2251   5
  -2  -6   7 1177.62 34.2283   6
  -2  -6   7 1151.66 66.1714   3
  -2  -6   6 2283.75 47.7038   6
  -2  -6   6 2167.69 47.0295   1
  -2  -6   6 2168.28 85.1947   3
   2   6  -6 2360.98 87.1248   5
  -2  -6   5 2801.44 55.2805   6
   2   6  -5 2747.36 55.9252   6
  -2  -6   5 2686.15 91.0946   3
   2   6  -5 2777.92 96.2550   5
  -2  -6   5 2812.44 55.7854   1
   2   6  -4 15771.0 141.437   6
  -2  -6   4 16003.3 139.763   6
   2   6  -4 16115.2 215.099   5
  -2  -6   4 15968.0 139.067   1
  -2  -6   4 15974.7 210.704   3
  -2  -6   3 10636.2 122.753   1
  -2  -6   3 10333.3 121.293   6
   2   6  -3 10030.1 120.989   6
   2   6  -3 10144.2 171.395   5
  -2  -6   3 9943.22 164.377   3
  -2  -6   2 10702.5 130.716   1
  -2  -6   2 10474.8 130.909   6
   2   6  -2 9749.30 128.029   6
   2   6  -2 10136.7 168.234   5
   2   6  -1 7050.67 114.767   1
   2   6  -1 6906.23 115.925   6
   2   6  -1 6890.29 141.275   5
  -2  -6   1 7167.29 116.496   6
  -2  -6   1 7426.58 117.052   1
  -2  -6   0 1483.51 59.7784   1
   2   6   0 1343.45 58.1755   6
   2   6   0 1325.09 65.7494   5
  -2  -6   0 1342.34 49.8690   2
  -2  -6  -1 841.157 37.3808   2
   2   6   1 827.405 48.3005   6
  -2  -6  -1 900.030 50.3859   1
   2   6   1 874.238 55.3916   5
  -2  -6  -2 4110.55 77.7772   2
   2   6   2 3793.82 102.079   6
  -2  -6  -2 4174.79 106.870   1
  -2  -6  -3 4614.94 77.3600   2
  -2  -6  -3 4666.33 117.525   1
   2   6   3 4417.84 115.134   6
  -2  -6  -4 13.7551 10.6163   4
  -2  -6  -4 5.30214 23.9989   1
  -2  -6  -4 19.6016 11.0529   2
   2   6   4 8.99189 19.4714   6
  -2  -6  -5 717.088 27.9075   2
   2   6   5 779.164 56.0825   6
  -2  -6  -5 718.728 27.9016   4
  -2  -6  -5 755.877 56.1589   1
  -2  -6  -6 310.598 17.4507   4
  -2  -6  -6 290.568 39.9872   1
   2   6   6 307.497 40.0663   6
  -2  -6  -6 304.344 17.5667   2
  -2  -6  -7 455.257 19.6688   4
  -2  -6  -7 506.345 53.2796   1
   2   6   7 533.664 52.0200   6
   2   6   8 1050.72 73.3197   6
  -2  -6  -8 785.917 24.8705   4
  -2  -6  -8 1025.11 76.2039   1
   2   6   9 631.280 62.2342   6
  -2  -6  -9 560.775 62.2513   1
  -2  -6 -10 1862.16 107.571   1
   2   6  10 1854.17 103.413   6
  -2  -6 -11 452.541 72.6201   1
   2   6  11 320.561 51.5462   6
   2   6  12 347.194 56.6625   6
  -2  -6 -12 394.214 64.0568   1
   2   6  13 314.918 54.4570   6
  -2  -6 -13 378.693 63.4526   1
   2   6  14 535.859 68.3095   6
  -2  -6 -14 716.655 86.0589   1
  -2  -6 -15 493.705 77.8342   1
   2   6  15 327.433 59.3062   6
   2   7 -19 58.9140 39.1813   5
  -2  -7  19 9.12889 36.5710   3
  -2  -7  18 237.402 53.5711   3
   2   7 -18 207.639 49.0367   5
  -2  -7  17-5.89311 34.6904   3
   2   7 -17 41.2409 31.3938   5
  -2  -7  16 228.138 46.9749   3
   2   7 -16 231.626 47.5646   5
  -2  -7  15 811.478 70.7473   3
   2   7 -15 749.102 68.5226   5
  -2  -7  14 212.775 42.2042   3
   2   7 -14 270.781 44.9844   5
   2   7 -13 130.604 34.5697   5
  -2  -7  13 89.6334 27.8594   3
  -2  -7  12 67.8643 31.2426   3
   2   7 -12 22.6778 23.8629   5
  -2  -7  11 108.777 35.8309   3
   2   7 -11 135.808 31.2722   5
  -2  -7  10 120.949 31.8070   3
  -2  -7  10 112.574 16.1768   6
  -2  -7  10 91.5559 12.6940   1
   2   7 -10 156.818 34.7949   5
  -2  -7   9 393.120 23.1480   1
  -2  -7   9 461.419 25.9708   6
  -2  -7   9 458.753 46.5750   3
   2   7  -9 486.297 50.6265   5
  -2  -7   8 541.425 48.3997   3
  -2  -7   8 519.219 26.1107   6
   2   7  -8 537.614 47.7504   5
  -2  -7   7 29.5267 11.8662   1
  -2  -7   7 48.5359 12.6377   6
  -2  -7   7 35.0936 25.3902   3
   2   7  -7 21.0408 21.6955   5
  -2  -7   6 22.3035 12.1135   1
  -2  -7   6 21.5688 23.0303   3
   2   7  -6 11.1798 22.1557   5
  -2  -7   6 26.5123 12.0660   6
   2   7  -5 143.202 19.1343   6
  -2  -7   5 170.110 20.0750   1
  -2  -7   5 147.796 30.1533   3
  -2  -7   5 198.596 21.1794   6
   2   7  -5 183.204 32.1344   5
   2   7  -4 5.18856 14.8989   6
  -2  -7   4 48.8090 17.1560   6
  -2  -7   4 43.2596 17.9781   1
   2   7  -4 59.3495 27.9460   5
  -2  -7   4 55.9556 26.0760   3
  -2  -7   3 2309.36 64.6576   1
  -2  -7   3 2183.64 62.6402   6
   2   7  -3 2144.11 64.3322   6
   2   7  -3 2256.04 88.8480   5
  -2  -7   3 2177.76 83.9647   3
  -2  -7   2 2885.56 75.0319   1
   2   7  -2 2690.94 75.8906   6
   2   7  -2 2794.60 95.8487   5
  -2  -7   1 95.4998 22.2976   1
   2   7  -1 77.2230 23.3554   6
   2   7  -1 55.1726 29.5792   5
   2   7   0 834.050 48.9298   6
   2   7   0 833.104 56.1504   5
  -2  -7   0 786.167 44.6953   1
   2   7   1 1759.80 71.4681   6
  -2  -7  -1 1772.52 56.9155   2
  -2  -7  -1 1798.71 71.5855   1
   2   7   1 1794.90 79.0625   5
   2   7   2 653.118 46.7269   6
  -2  -7  -2 740.200 52.1698   1
  -2  -7  -2 675.184 34.0216   2
  -2  -7  -3 103.141 30.7892   1
  -2  -7  -3 37.4191 13.0076   2
   2   7   3 55.6476 23.5187   6
  -2  -7  -4 210.848 18.8708   2
   2   7   4 170.046 33.7364   6
  -2  -7  -4 150.491 16.5573   4
  -2  -7  -4 154.628 33.2037   1
   2   7   5 2014.54 90.7634   6
  -2  -7  -5 2016.98 91.1248   1
  -2  -7  -5 1795.00 42.2101   2
  -2  -7  -5 1794.01 42.2562   4
  -2  -7  -6 1147.99 29.1469   4
   2   7   6 1327.08 78.6376   6
  -2  -7  -6 1032.29 29.4512   2
  -2  -7  -6 1394.31 81.2321   1
  -2  -7  -7 62.9501 27.9876   1
   2   7   7 95.3181 30.3928   6
  -2  -7  -8 231.088 42.6475   1
   2   7   8 228.167 41.6513   6
  -2  -7  -9 63.2791 35.3510   1
   2   7   9 76.9827 33.9512   6
   2   7  10 218.846 43.5258   6
  -2  -7 -10 245.610 51.8837   1
   2   7  11 45.7649 33.0492   6
  -2  -7 -11 46.7638 40.0261   1
   2   7  12 431.914 60.9910   6
  -2  -7 -12 369.236 58.8147   1
  -2  -7 -13 170.048 54.3832   1
   2   7  13 192.664 47.6487   6
   2   7  14 130.355 46.9492   6
  -2  -7 -14 177.272 59.4350   1
  -2  -8  19 25.1031 41.7617   3
   2   8 -19-7.66842 35.6976   5
   2   8 -18 39.6543 34.9845   5
  -2  -8  18-3.04276 33.8498   3
  -2  -8  17 628.400 73.3620   3
   2   8 -17 572.199 66.8249   5
   2   8 -16 1118.19 87.5388   5
  -2  -8  16 1125.12 88.2284   3
   2   8 -15 778.835 71.6646   5
  -2  -8  15 948.132 78.1137   3
  -2  -8  14 795.628 71.6317   3
   2   8 -14 692.910 65.8170   5
   2   8 -13 2099.36 106.619   5
  -2  -8  13 1936.60 101.372   3
  -2  -8  12 398.629 54.2582   3
   2   8 -12 401.307 52.7962   5
   2   8 -11 479.481 56.0445   5
  -2  -8  11 373.868 48.5155   3
  -2  -8  10 1604.33 88.2733   3
   2   8 -10 1767.16 90.8824   5
  -2  -8   9 782.456 66.4079   3
   2   8  -9 858.532 68.8129   5
  -2  -8   9 870.468 38.4996   1
  -2  -8   8 2720.83 64.0970   1
  -2  -8   8 2638.29 62.4907   6
  -2  -8   8 2889.15 108.736   3
   2   8  -8 2770.64 109.718   5
  -2  -8   7 1819.26 53.8741   1
   2   8  -7 1851.66 86.7196   5
  -2  -8   7 1780.32 52.4968   6
  -2  -8   7 1772.16 85.6192   3
  -2  -8   6 3602.21 76.7234   6
  -2  -8   6 3581.11 115.930   3
   2   8  -6 3680.48 120.043   5
  -2  -8   6 3735.50 78.3043   1
   2   8  -5 5231.00 99.1413   6
  -2  -8   5 5402.63 98.1413   6
   2   8  -5 5449.10 141.100   5
  -2  -8   5 5424.12 98.8260   1
  -2  -8   5 5463.42 141.395   3
   2   8  -4 3072.04 79.8928   6
  -2  -8   4 3185.11 79.5707   1
  -2  -8   4 3182.31 78.5166   6
  -2  -8   4 3005.06 109.666   3
   2   8  -4 3133.79 111.382   5
  -2  -8   3 2835.77 79.3145   1
   2   8  -3 2363.20 75.2001   6
   2   8  -3 2752.61 103.742   5
  -2  -8   3 2570.71 97.5194   3
   2   8  -2 4638.61 107.337   6
  -2  -8   2 4768.27 106.119   1
   2   8  -2 4887.91 133.431   5
   2   8  -1 8661.98 176.919   5
   2   8  -1 8505.13 150.461   6
  -2  -8   1 8868.72 148.336   1
   2   8   0 2527.50 87.3558   6
  -2  -8   0 2735.34 88.3175   1
   2   8   0 2488.98 99.9986   5
  -2  -8  -1 2256.56 85.0359   1
   2   8   1 2130.82 84.8129   6
  -2  -8  -2 1000.87 62.6093   1
   2   8   2 913.752 59.6944   6
  -2  -8  -2 928.779 42.3911   4
  -2  -8  -2 887.394 41.3601   2
  -2  -8  -3 127.526 17.2190   2
  -2  -8  -3 193.872 21.4205   4
   2   8   3 162.243 32.3030   6
  -2  -8  -3 228.389 39.5945   1
  -2  -8  -4 1148.15 75.2433   1
  -2  -8  -4 1107.34 39.3120   2
  -2  -8  -4 1108.51 38.6047   4
   2   8   4 1054.55 67.9025   6
   2   8   5 3680.44 126.317   6
  -2  -8  -5 3326.66 56.4036   2
  -2  -8  -5 3767.86 128.596   1
  -2  -8  -5 3330.48 56.4718   4
  -2  -8  -6 3632.14 132.286   1
   2   8   6 3753.53 132.830   6
  -2  -8  -7 2219.12 109.148   1
   2   8   7 2249.90 108.539   6
  -2  -8  -8 3315.81 139.548   1
   2   8   8 3240.00 134.092   6
  -2  -8  -9 1941.23 109.633   1
   2   8   9 2090.25 112.568   6
  -2  -8 -10 1089.78 88.3892   1
   2   8  10 1165.41 88.7941   6
   2   8  11 1016.11 87.6787   6
  -2  -8 -11 924.146 83.4739   1
  -2  -8 -12 1236.07 101.535   1
   2   8  12 1336.79 102.135   6
   2   8  13 445.518 69.6110   6
  -2  -8 -13 377.335 68.5747   1
  -2  -9  19 334.688 60.8677   3
   2   9 -19 247.785 54.8138   5
  -2  -9  18 168.322 50.2990   3
   2   9 -18 105.546 41.3208   5
  -2  -9  17 955.202 85.4217   3
   2   9 -17 1141.28 90.9817   5
  -2  -9  16 20.4073 31.4919   3
   2   9 -16-22.6168 31.3501   5
  -2  -9  15 159.703 40.0508   3
   2   9 -15 174.901 42.1866   5
   2   9 -14 71.2614 33.0211   5
  -2  -9  14 9.70413 29.4936   3
   2   9 -13 160.661 39.1864   5
  -2  -9  13 168.828 41.8470   3
  -2  -9  12 770.352 69.5767   3
   2   9 -12 780.515 69.5826   5
  -2  -9  11 15.5873 29.0441   3
   2   9 -11-1.06738 26.3205   5
  -2  -9  10 1170.44 76.8400   3
   2   9 -10 1189.27 78.4811   5
  -2  -9   9 20.9784 14.7045   1
  -2  -9   9 6.85657 27.8404   3
   2   9  -9 5.67214 25.8682   5
  -2  -9   8 134.398 20.1415   1
   2   9  -8 138.389 35.0856   5
  -2  -9   8 77.6768 31.8669   3
  -2  -9   7 1183.51 47.6313   6
  -2  -9   7 1166.55 74.1682   3
   2   9  -7 1234.39 75.7106   5
  -2  -9   7 1200.64 48.1456   1
  -2  -9   6 1133.98 71.6630   3
   2   9  -6 1121.89 49.5290   6
  -2  -9   6 1214.97 50.9152   1
   2   9  -6 1171.63 73.9313   5
  -2  -9   5 2979.56 80.2414   1
   2   9  -5 2945.85 81.5560   6
   2   9  -5 3000.08 112.212   5
  -2  -9   5 3024.65 110.472   3
  -2  -9   4 1953.60 66.9761   1
   2   9  -4 1842.71 89.9330   5
   2   9  -4 1755.04 66.7805   6
  -2  -9   4 1835.60 86.5117   3
   2   9  -3 1680.66 66.5013   6
   2   9  -3 1674.47 84.1984   5
  -2  -9   3 1819.28 67.7319   1
  -2  -9   2 404.651 34.9908   1
   2   9  -2 375.122 45.3198   5
   2   9  -2 426.722 38.8055   6
  -2  -9   1 211.880 28.4637   1
   2   9  -1 237.483 32.5525   6
   2   9  -1 216.344 36.7647   5
   2   9   0 155.439 30.0902   6
  -2  -9   0 116.012 23.0121   1
   2   9   0 140.232 33.4463   5
   2   9   1 571.014 48.7287   6
  -2  -9  -1 547.866 47.1661   1
  -2  -9  -2 417.594 31.2068   4
   2   9   2 431.498 44.5312   6
  -2  -9  -2 481.441 46.0761   1
   2   9   3 148.579 33.0731   6
  -2  -9  -3 112.523 14.8103   2
  -2  -9  -3 176.854 38.5853   1
   2   9   4 508.062 50.7383   6
  -2  -9  -4 457.652 50.5304   1
   2   9   5 559.581 57.5332   6
  -2  -9  -5 610.619 57.7151   1
  -2  -9  -6 250.690 42.2702   1
   2   9   6 306.335 46.2589   6
  -2  -9  -7 586.945 61.7087   1
   2   9   7 631.822 63.4129   6
  -2  -9  -8 558.304 62.3289   1
   2   9   8 610.353 65.1361   6
   2   9   9 483.702 61.3144   6
  -2  -9  -9 393.995 56.2679   1
  -2  -9 -10 258.190 49.7542   1
   2   9  10 223.223 46.0087   6
   2   9  11 69.8409 37.0409   6
  -2  -9 -11 4.17671 38.7428   1
   2   9  12 36.8582 35.1207   6
  -2  -9 -12-42.4108 45.8566   1
  -2 -10  18 800.960 83.7171   3
   2  10 -18 774.535 82.1214   5
  -2 -10  17 567.279 73.1347   3
   2  10 -17 624.617 73.7045   5
  -2 -10  16 201.261 53.1781   3
   2  10 -16 279.877 54.2968   5
   2  10 -15 366.475 56.7391   5
  -2 -10  15 356.443 55.4359   3
   2  10 -14 113.913 35.6828   5
  -2 -10  14 160.168 46.1559   3
  -2 -10  13 533.004 63.3073   3
   2  10 -13 609.401 65.4561   5
  -2 -10  12 3.13337 30.3644   3
   2  10 -12-51.1406 32.4148   5
  -2 -10  11 605.532 61.5918   3
   2  10 -11 655.968 65.7734   5
   2  10 -10 249.110 44.3426   5
  -2 -10  10 201.029 41.0949   3
  -2 -10   9 602.483 37.7151   1
   2  10  -9 581.345 58.2181   5
  -2 -10   9 562.859 59.5578   3
  -2 -10   8 909.523 45.5143   1
  -2 -10   8 877.973 70.1841   3
   2  10  -8 926.822 69.4639   5
  -2 -10   7 1438.23 57.1326   1
  -2 -10   7 1413.83 83.9991   3
   2  10  -7 1443.95 84.5209   5
   2  10  -6 336.690 45.6557   5
  -2 -10   6 358.700 50.1456   3
   2  10  -6 367.455 32.9189   6
  -2 -10   6 298.269 31.1353   1
   2  10  -5 1050.60 53.4460   6
  -2 -10   5 938.285 49.1682   1
  -2 -10   5 983.758 68.5867   3
   2  10  -5 983.253 69.7560   5
  -2 -10   4 66.0478 31.3399   3
   2  10  -4 45.1838 20.2100   6
   2  10  -4 55.3415 29.0336   5
  -2 -10   4 103.087 22.6834   1
  -2 -10   3 218.641 29.2144   1
   2  10  -3 162.095 29.0887   6
   2  10  -3 207.921 37.5603   5
   2  10  -2 491.675 42.2746   6
  -2 -10   2 517.477 42.3090   1
   2  10  -2 473.754 52.1586   5
  -2 -10   1 188.488 28.0980   1
   2  10  -1 192.028 31.8565   6
   2  10  -1 164.352 34.4501   5
   2  10   0 52.8637 29.8269   5
   2  10   0 51.1750 23.8159   6
  -2 -10   0 44.5927 20.4310   1
   2  10   1 254.072 39.5377   6
  -2 -10  -1 279.018 37.6359   1
   2  10   2 256.735 38.8422   6
  -2 -10  -2 258.901 40.7110   1
  -2 -10  -3 170.292 38.2170   1
   2  10   3 98.0567 30.5510   6
  -2 -10  -4 127.755 37.4334   1
   2  10   4 124.708 35.1622   6
   2  10   5 945.113 72.1583   6
  -2 -10  -5 961.112 75.7392   1
  -2 -10  -6-7.04830 37.0217   1
   2  10   6 132.999 37.1742   6
  -2 -10  -7-39.5557 38.3986   1
   2  10   7 22.7719 28.4122   6
  -2 -10  -8 190.388 43.8090   1
   2  10   8 195.361 46.4833   6
  -2 -10  -9-11.5328 40.2116   1
   2  10   9-1.41842 33.5460   6
  -2 -10 -10 52.9478 37.9123   1
   2  10  10 46.6383 37.6919   6
   2  10  11 31.0593 45.6143   6
  -2 -10 -11-43.6808 46.5532   1
   2  11 -17 26.1524 36.7189   5
  -2 -11  17-11.9605 37.1260   3
  -2 -11  16-6.71262 37.1213   3
   2  11 -16 37.5521 34.3481   5
   2  11 -15 15.9499 29.3509   5
  -2 -11  15-9.74693 34.8312   3
  -2 -11  14 167.050 46.1345   3
   2  11 -14 222.368 51.3361   5
  -2 -11  13 258.126 51.9858   3
   2  11 -13 366.671 52.3881   5
  -2 -11  12 285.171 51.9635   3
   2  11 -12 301.233 50.6558   5
  -2 -11  11 846.905 73.3098   3
   2  11 -11 912.397 77.9853   5
  -2 -11  10 596.806 63.6409   3
   2  11 -10 590.675 61.2152   5
  -2 -11   9 225.060 44.1154   3
   2  11  -9 269.207 48.4454   5
  -2 -11   8 2.60686 17.7403   1
  -2 -11   8 32.2238 33.1910   3
   2  11  -8 35.4070 30.5348   5
  -2 -11   7 901.005 49.9080   1
  -2 -11   7 898.326 71.3089   3
   2  11  -7 912.474 72.1216   5
   2  11  -6 805.405 67.4132   5
  -2 -11   6 738.090 67.2663   3
  -2 -11   6 845.797 49.5049   1
   2  11  -6 884.277 51.5810   6
  -2 -11   5 632.429 45.9262   1
   2  11  -5 523.778 42.9397   6
  -2 -11   5 524.659 55.8188   3
   2  11  -5 460.299 52.7528   5
   2  11  -4 64.2744 22.5207   6
   2  11  -4 115.451 39.6978   5
  -2 -11   4 72.1046 33.5906   3
  -2 -11   4 128.351 30.2456   1
  -2 -11   3 242.828 32.6708   1
   2  11  -3 163.907 30.8792   6
   2  11  -3 209.246 40.6158   5
  -2 -11   2 665.536 51.6775   1
   2  11  -2 577.065 51.0427   6
   2  11  -2 689.323 62.6706   5
   2  11  -1 2186.19 106.844   5
   2  11  -1 2155.89 92.4982   6
  -2 -11   1 2221.90 90.6034   1
   2  11   0 159.837 34.7760   6
  -2 -11   0 140.252 30.1727   1
   2  11   1 89.1679 28.3613   6
  -2 -11  -1 138.292 34.7826   1
   2  11   2 4.38678 24.3866   6
  -2 -11  -2-8.63724 22.5010   1
  -2 -11  -3 475.282 56.0330   1
   2  11   3 365.737 47.0080   6
   2  11   4 30.6014 28.6024   6
  -2 -11  -4 80.0686 34.8506   1
  -2 -11  -5 338.497 52.2261   1
   2  11   5 339.737 51.2688   6
  -2 -11  -6-37.3896 39.7525   1
   2  11   6 30.0674 34.7561   6
  -2 -11  -7 862.910 77.1675   1
   2  11   7 993.737 82.9590   6
  -2 -11  -8 8.72714 36.3330   1
   2  11   8 3.97756 34.4479   6
   2  11   9 588.087 69.3678   6
  -2 -11  -9 571.592 71.6325   1
  -2 -11 -10-35.4421 46.2690   1
   2  11  10 26.8836 36.8370   6
  -2 -12  17-53.2839 43.4620   3
  -2 -12  16-10.0172 37.1780   3
   2  12 -16 52.2497 35.8923   5
  -2 -12  15-36.5573 37.8376   3
   2  12 -15 31.8025 35.9970   5
   2  12 -14 1.58258 32.5329   5
  -2 -12  14 51.6741 43.0170   3
  -2 -12  13 113.364 44.8680   3
   2  12 -13 78.8157 33.0149   5
   2  12 -12 20.5442 33.5163   5
  -2 -12  12-15.5137 33.0171   3
   2  12 -11 435.641 58.5083   5
  -2 -12  11 408.500 57.8537   3
   2  12 -10 61.2562 31.1488   5
  -2 -12  10-24.2536 37.9201   3
   2  12  -9 36.9633 36.2498   5
  -2 -12   9 26.6946 37.8469   3
  -2 -12   8 54.8108 35.3842   3
   2  12  -8-4.72192 27.9381   5
  -2 -12   7 20.5358 19.5476   1
   2  12  -7 33.7665 29.6088   5
  -2 -12   7 31.6157 33.5218   3
   2  12  -6 34.9939 31.7658   5
   2  12  -6 18.3920 19.5934   6
  -2 -12   6 9.43226 29.3722   3
  -2 -12   5 709.896 52.1691   1
   2  12  -5 573.323 47.0160   6
  -2 -12   5 619.782 66.9000   3
   2  12  -5 623.653 62.5793   5
  -2 -12   4 692.869 67.5494   3
  -2 -12   4 757.235 52.6465   1
   2  12  -4 676.775 51.9568   6
   2  12  -4 682.860 69.5514   5
   2  12  -3 588.481 50.7423   6
   2  12  -3 594.318 61.6016   5
  -2 -12   3 600.790 49.0387   1
   2  12  -2 25.8693 25.1311   6
  -2 -12   2 21.0976 21.2982   1
   2  12  -2 17.8336 34.8259   5
   2  12  -1 633.805 63.8441   5
  -2 -12   1 602.569 51.5122   1
   2  12  -1 659.565 58.0855   6
   2  12   0 825.746 64.9252   6
  -2 -12   0 918.827 66.2890   1
   2  12   1 865.629 68.1609   6
  -2 -12  -1 870.825 68.4803   1
   2  12   2 927.889 71.4552   6
  -2 -12  -2 937.021 73.3467   1
  -2 -12  -3 967.289 78.1562   1
   2  12   3 947.535 74.9816   6
  -2 -12  -4-0.83937 30.0724   1
   2  12   4 13.4738 27.7520   6
  -2 -12  -5 48.4471 38.1117   1
   2  12   5-3.01213 29.3542   6
   2  12   6 23.7964 28.9864   6
  -2 -12  -6-6.24541 34.6827   1
  -2 -12  -7 2.36372 38.1396   1
   2  12   7 46.0462 38.9869   6
  -2 -12  -8-23.3315 46.7115   1
   2  12   8 35.7724 39.6583   6
  -2 -12  -9 6.43687 42.7377   1
   2  12   9 47.2146 37.8632   6
  -2 -13  16 26.2025 42.0203   3
  -2 -13  15 25.6762 37.0614   3
   2  13 -15 47.9844 39.4577   5
  -2 -13  14 539.065 70.2495   3
   2  13 -14 574.055 70.2912   5
  -2 -13  13 820.681 81.9947   3
   2  13 -13 964.400 85.6732   5
  -2 -13  12 65.8976 37.7668   3
   2  13 -12 44.6897 32.1993   5
  -2 -13  11 501.632 63.6089   3
   2  13 -11 678.229 70.4443   5
  -2 -13  10 707.190 74.5327   3
   2  13 -10 864.535 79.0179   5
  -2 -13   9 171.433 49.0752   3
   2  13  -9 143.099 42.7001   5
  -2 -13   8 398.306 56.8557   3
   2  13  -8 374.418 55.7049   5
  -2 -13   7 345.047 58.2079   3
   2  13  -7 421.223 59.0861   5
  -2 -13   6 622.773 51.2552   1
   2  13  -6 483.362 60.5383   5
  -2 -13   6 413.094 61.6766   3
   2  13  -5 37.4781 24.8654   6
   2  13  -5 6.56965 28.4659   5
  -2 -13   5 28.0825 35.0370   3
  -2 -13   5 33.0831 22.8876   1
  -2 -13   4 722.111 56.7248   1
   2  13  -4 529.444 50.7095   6
   2  13  -4 611.574 70.1867   5
  -2 -13   4 594.982 66.7843   3
  -2 -13   3 2421.25 98.5913   1
   2  13  -3 2419.82 122.784   5
   2  13  -3 2484.96 104.236   6
  -2 -13   2 146.589 28.9957   1
   2  13  -2 174.507 37.3847   6
   2  13  -2 160.327 41.3861   5
   2  13  -1 10.9262 26.3459   6
  -2 -13   1 2.35862 19.4071   1
   2  13   0 2401.64 111.673   6
  -2 -13   0 2378.91 108.881   1
   2  13   1 446.747 53.4063   6
  -2 -13  -1 512.039 57.0420   1
  -2 -13  -2 360.879 50.2584   1
   2  13   2 339.174 52.2199   6
   2  13   3 42.7618 30.1808   6
  -2 -13  -3 155.577 40.9763   1
  -2 -13  -4 133.243 40.8498   1
   2  13   4 123.221 40.1129   6
  -2 -13  -5 447.223 61.4899   1
   2  13   5 331.442 55.7405   6
  -2 -13  -6 152.472 44.1186   1
   2  13   6 305.741 55.1817   6
   2  13   7 248.342 54.8241   6
  -2 -13  -7 243.176 53.4109   1
  -2 -13  -8 311.674 61.4766   1
   2  14 -14 5.58345 37.1147   5
  -2 -14  14 3.58851 36.3161   3
  -2 -14  13 605.043 76.1868   3
   2  14 -13 663.126 77.3924   5
   2  14 -12 532.024 67.5789   5
  -2 -14  12 522.579 68.8041   3
  -2 -14  11 52.3717 37.7625   3
   2  14 -11 72.0364 35.3117   5
  -2 -14  10 140.306 44.7921   3
   2  14 -10 264.204 52.4821   5
   2  14  -9 199.260 45.8610   5
  -2 -14   9 255.390 54.0288   3
  -2 -14   8 173.670 43.1848   3
   2  14  -8 249.282 50.9623   5
   2  14  -7 409.511 59.8975   5
  -2 -14   7 403.140 58.0065   3
  -2 -14   6 263.766 49.3478   3
   2  14  -6 279.857 51.7975   5
  -2 -14   5 865.972 60.5333   1
  -2 -14   5 817.374 77.0356   3
   2  14  -5 768.224 74.4810   5
  -2 -14   4 1.77839 33.2398   3
  -2 -14   4 35.1361 25.0439   1
   2  14  -4 18.3014 23.3646   6
   2  14  -4 2.67144 30.8812   5
  -2 -14   3 39.1801 21.1447   1
   2  14  -3 62.1807 28.3789   6
   2  14  -3 77.4927 39.4989   5
  -2 -14   3 92.0938 40.8675   3
   2  14  -2 45.7582 31.7835   6
  -2 -14   2-19.3869 26.5573   1
  -2 -14   1 66.2019 29.0698   1
   2  14  -1 67.5080 34.8458   6
   2  14   0 252.852 44.4585   6
  -2 -14   0 291.312 45.4307   1
   2  14   1 35.6156 29.8541   6
  -2 -14  -1 87.0040 35.3540   1
   2  14   2 339.351 53.1962   6
  -2 -14  -2 338.295 52.1260   1
  -2 -14  -3 42.4235 38.8078   1
   2  14   3 34.0224 33.8547   6
   2  14   4 314.440 53.1154   6
  -2 -14  -4 306.147 57.5331   1
  -2 -14  -5 464.701 68.6240   1
   2  14   5 543.782 70.2298   6
  -2 -14  -6-43.8123 45.4804   1
   2  14   6 9.96378 34.7916   6
   2  15 -12 820.034 85.6726   5
  -2 -15  12 786.455 80.3189   3
  -2 -15  11 313.245 59.7227   3
   2  15 -11 326.563 58.3936   5
  -2 -15  10 171.019 46.2434   3
   2  15 -10 277.114 55.2030   5
  -2 -15   9 85.8294 46.1959   3
   2  15  -9 132.939 44.3557   5
  -2 -15   8 15.8429 38.5241   3
   2  15  -8 40.7223 37.7844   5
  -2 -15   7-1.13688 37.2904   3
   2  15  -7 36.9090 33.7362   5
   2  15  -6 1421.87 105.510   5
  -2 -15   6 1410.01 107.358   3
  -2 -15   5 745.066 78.0406   3
   2  15  -5 708.924 76.0854   5
  -2 -15   4 489.070 65.5016   3
   2  15  -4 433.705 65.1106   5
   2  15  -3 1196.51 81.7364   6
  -2 -15   3 1292.35 100.909   3
  -2 -15   3 1319.08 81.8920   1
  -2 -15   2 1138.07 77.6425   1
   2  15  -2 1151.57 82.2696   6
   2  15  -1 1548.35 97.5126   6
  -2 -15   1 1645.71 97.4791   1
   2  15   0 266.704 47.8896   6
  -2 -15   0 228.528 45.0328   1
   2  15   1 37.9723 34.1333   6
  -2 -15  -1 114.473 37.5737   1
  -2 -15  -2 308.140 56.9628   1
   2  15   2 305.750 54.9683   6
   2  15   3 572.483 70.3556   6
  -2 -15  -3 598.510 74.8983   1
   2  15   4 596.089 72.8467   6
  -2 -15  -4 646.832 77.4466   1
   2  15   5 1712.46 117.082   6
  -2 -15  -5 1862.85 121.148   1
  -2 -16   9 240.791 60.9449   3
   2  16  -9 180.751 52.9997   5
  -2 -16   8 32.5090 40.9404   3
   2  16  -8 18.3492 38.4605   5
   2  16  -7 86.5472 40.4377   5
  -2 -16   7 109.303 49.1890   3
  -2 -16   6 125.973 45.8260   3
   2  16  -6 171.914 50.3297   5
  -2 -16   5 525.685 71.8542   3
   2  16  -5 508.528 71.1467   5
  -2 -16   4 293.192 58.0507   3
  -2 -16   3 41.6920 41.6885   3
  -2 -16   2 128.625 35.6436   1
  -2 -16   1 403.124 56.1868   1
   2  16  -1 242.670 47.3279   6
  -2 -16   0 133.733 44.3989   1
   2  16   0 166.463 49.3663   6
   2  16   1 195.676 48.2015   6
  -2 -16  -1 342.499 55.0904   1
   2  16   2 16.0000 41.4206   6
  -2 -16  -2 76.0868 42.2595   1
  -2 -16  -3 78.1339 48.4121   1
   2  16   3 4.14143 36.4411   6
  -2 -17   0 244.779 51.7688   1
  -2 -17  -1 245.077 58.2021   1
   2  17   1 138.961 45.8845   6
  -3  18  -2 182.077 52.8641   6
   3 -18   2 197.134 53.1653   1
  -3  18  -3 847.037 84.7753   6
   3 -18   3 896.067 83.6279   1
   3 -18   4 242.917 51.0510   1
   3 -18   5 72.0646 30.5204   1
   3 -18   6 1094.90 85.0814   2
   3 -18   6 1217.69 92.6989   1
   3 -18   7 985.979 84.5487   1
   3 -18   7 902.953 80.2255   2
   3 -18   8 1986.38 121.778   2
   3 -17  -2 317.219 60.9648   1
   3 -17  -1 87.4304 44.0230   1
  -3  17   1 45.1044 39.6745   6
  -3  17   0-37.0990 39.1719   6
   3 -17   0 29.8114 42.8637   1
  -3  17  -1 385.997 60.7972   6
   3 -17   1 356.937 58.3141   1
   3 -17   2 163.204 50.1174   1
  -3  17  -2 127.763 44.5041   6
   3 -17   3 18.9965 30.0958   1
  -3  17  -3 124.150 40.4405   6
   3 -17   4 33.6160 28.1171   1
   3 -17   4 195.398 42.0471   3
   3 -17   5 24.3563 26.5056   1
  -3  17  -5 178.419 43.5646   4
   3 -17   5 136.133 34.1760   2
   3 -17   5 154.960 39.0159   3
  -3  17  -6 185.000 48.4505   4
   3 -17   6 120.800 36.0317   1
   3 -17   6 121.431 33.1220   2
   3 -17   7 57.0271 26.3065   1
   3 -17   7 36.9463 24.6022   2
  -3  17  -8 9.68237 35.6188   4
   3 -17   8 29.3939 32.0121   2
  -3  17  -9-19.7464 38.8572   4
   3 -17   9 17.0749 39.6424   2
  -3  16   4 92.9081 42.9812   6
   3 -16  -4 43.3072 40.5389   1
  -3  16   3-23.8624 36.1211   6
   3 -16  -3 29.9540 36.2410   1
   3 -16  -2 30.7873 37.4396   1
  -3  16   2 79.8395 40.4091   6
   3 -16  -1 48.2436 34.6652   1
  -3  16   1 41.5815 37.0354   6
  -3  16   0 114.812 38.7113   6
   3 -16   0 133.231 40.3653   1
  -3  16  -1 97.2852 40.6563   6
   3 -16   1 113.100 39.9182   1
   3 -16   2 44.3710 33.2225   1
  -3  16  -2 14.8277 29.7002   6
  -3  16  -3 159.824 37.6355   4
  -3  16  -3 156.191 43.3570   6
   3 -16   3 119.392 36.7633   1
   3 -16   3 119.374 26.7051   2
  -3  16  -4 416.546 51.3557   4
   3 -16   4 359.525 47.1583   1
   3 -16   4 366.387 45.6596   2
   3 -16   5 7.39536 27.2078   1
  -3  16  -5 71.4410 38.1331   4
   3 -16   5 56.1719 29.3874   2
   3 -16   5 76.3770 32.5341   3
  -3  16  -6 230.075 46.5142   4
   3 -16   6 235.410 41.5107   2
   3 -16   6 284.831 45.3183   3
   3 -16   6 185.417 39.2077   1
   3 -16   7 36.4676 27.2644   2
  -3  16  -7 47.5635 36.1740   4
  -3  16  -8 15.4335 37.3020   4
   3 -16   8 40.2235 33.7824   2
  -3  16  -9 85.2232 36.1754   4
   3 -16   9 24.6937 32.5855   2
  -3  16 -10 60.5146 37.9787   4
   3 -16  10 51.2518 37.7181   2
   3 -15  -6 67.8213 40.8396   1
  -3  15   6 101.526 45.0952   6
   3 -15  -5 117.185 47.2507   1
  -3  15   5 107.499 41.1834   6
   3 -15  -4 406.045 60.2005   1
  -3  15   4 423.637 62.5393   6
   3 -15  -3 227.312 50.7069   1
  -3  15   3 250.871 48.3503   6
   3 -15  -2 356.307 58.4255   1
  -3  15   2 371.779 57.6833   6
   3 -15  -1-1.14029 31.8950   1
  -3  15   1-2.55993 31.8830   6
  -3  15   0 152.514 44.5430   6
   3 -15   0 129.494 39.7690   1
   3 -15   1-3.18609 28.4841   2
   3 -15   1 115.606 34.6348   1
  -3  15  -1 81.5391 39.8933   6
   3 -15   2-17.5959 27.9422   1
  -3  15  -2-17.8671 23.6899   4
  -3  15  -2 41.8385 37.0405   6
   3 -15   2-16.8451 27.1616   2
   3 -15   3 404.607 45.9114   2
   3 -15   3 349.328 48.0415   1
  -3  15  -3 352.402 47.3856   4
  -3  15  -3 427.624 56.2224   6
  -3  15  -4 169.197 39.2537   4
   3 -15   4 176.470 38.4890   1
   3 -15   4 166.726 33.0819   2
  -3  15  -5 139.155 37.0767   4
   3 -15   5 159.064 29.1493   2
   3 -15   5 188.569 38.4718   3
  -3  15  -6 518.231 62.9090   4
   3 -15   6 663.842 60.2217   3
   3 -15   6 505.380 55.7532   2
  -3  15  -7 26.4103 31.4657   4
   3 -15   7-16.2726 25.8623   2
   3 -15   7 58.2748 27.8876   3
  -3  15  -8 107.652 37.7386   4
   3 -15   8 31.4680 30.4924   2
  -3  15  -9 156.080 45.0652   4
   3 -15   9 150.728 41.1224   2
  -3  15 -10-34.6525 37.5785   4
   3 -15  10 40.7241 34.8186   2
  -3  15 -11 28.9751 40.5527   4
   3 -15  11 15.9157 40.3065   2
   3 -14  -8 64.5950 49.2480   1
  -3  14   8-4.27884 36.5776   6
   3 -14  -7 141.887 44.8184   1
  -3  14   7 217.415 54.3290   6
   3 -14  -6 343.408 57.3635   1
  -3  14   6 290.579 55.6623   6
  -3  14   5 2019.01 121.062   6
   3 -14  -5 1856.52 113.531   1
   3 -14  -4 1274.47 95.4417   1
  -3  14   4 1281.19 97.4969   6
   3 -14  -3 126.919 42.6603   1
  -3  14   3 81.9195 35.9911   6
  -3  14   2 97.3481 39.6780   6
   3 -14  -2 78.4271 36.1984   1
  -3  14   1 816.073 75.8568   6
   3 -14  -1 724.747 69.7141   1
   3 -14   0 69.3322 34.3044   1
  -3  14   0 14.1385 34.2906   6
   3 -14   0 87.8098 24.4658   2
  -3  14  -1 85.0291 31.2122   4
  -3  14  -1 117.344 40.9495   6
   3 -14   1-2.24754 20.8557   2
   3 -14   1 71.2716 31.6432   1
  -3  14  -2 80.3465 28.6096   4
   3 -14   2 53.0965 21.2252   2
   3 -14   2 32.0450 24.6999   1
  -3  14  -2 51.1875 31.0200   6
   3 -14   3 1810.77 87.9856   2
  -3  14  -3 1905.14 96.0960   4
  -3  14  -3 1902.92 104.482   6
   3 -14   3 1858.99 98.8491   1
  -3  14  -4 835.281 67.9723   4
   3 -14   4 906.314 67.2566   2
  -3  14  -5 925.496 74.1396   4
   3 -14   5 970.075 71.2955   2
   3 -14   5 1121.15 73.5873   3
  -3  14  -6 635.779 65.5459   4
   3 -14   6 635.824 60.6117   2
   3 -14   6 721.926 59.8509   3
  -3  14  -7 4.59979 29.7270   4
   3 -14   7 5.95332 24.8672   2
   3 -14   7-11.3589 23.5587   3
   3 -14   8 516.203 46.2798   3
  -3  14  -8 648.164 72.1213   4
   3 -14   8 637.054 68.3058   2
  -3  14  -9 458.514 62.0123   4
   3 -14   9 405.539 59.5466   2
  -3  14 -10 293.898 50.1684   4
   3 -14  10 368.048 56.7482   2
  -3  14 -11 524.288 71.6641   4
   3 -14  11 629.148 71.5287   2
   3 -14  12 310.143 54.6303   2
  -3  14 -12 452.590 71.4250   4
  -3  13  10 45.1491 38.4678   6
   3 -13 -10 84.8844 47.0616   1
   3 -13  -9 165.314 51.2007   1
  -3  13   9 190.274 51.5834   6
   3 -13  -8 53.4971 40.2385   1
  -3  13   8 27.0872 35.1570   6
   3 -13  -7-26.1732 32.8865   1
  -3  13   7-17.1531 32.5278   6
   3 -13  -6 10.3108 33.7441   1
  -3  13   6 87.7079 41.8589   6
   3 -13  -5 86.4281 39.2111   1
  -3  13   5 33.6883 33.4179   6
   3 -13  -4 1.53349 30.2969   1
  -3  13   4 3.37605 30.3437   6
  -3  13   3 83.2576 34.4069   6
   3 -13  -3 89.2698 37.5825   1
   3 -13  -2 1469.62 92.6687   1
   3 -13  -2 1422.85 62.4997   2
  -3  13   2 1448.95 92.6174   6
   3 -13  -1 299.859 48.0638   1
  -3  13   1 277.319 33.1591   4
   3 -13  -1 344.663 35.5362   2
  -3  13   1 291.464 48.0511   6
  -3  13   0 796.246 53.9874   4
   3 -13   0 823.081 70.7835   1
  -3  13   0 806.079 70.2415   6
   3 -13   0 767.372 50.3862   2
  -3  13  -1 1785.07 83.4515   4
   3 -13   1 1860.36 98.2001   1
   3 -13   1 1818.24 80.1297   2
  -3  13  -1 1970.61 104.297   6
   3 -13   2 2312.07 94.1137   2
  -3  13  -2 2310.65 96.8232   4
   3 -13   2 2235.14 105.579   1
  -3  13  -2 2226.71 109.642   6
   3 -13   3 481.989 48.9018   2
  -3  13  -3 521.684 53.9326   4
  -3  13  -3 511.797 58.0034   6
  -3  13  -4 364.222 48.1821   4
   3 -13   4 382.960 44.9638   2
  -3  13  -5 115.329 34.2423   4
   3 -13   5 100.037 27.6160   2
   3 -13   5 193.643 36.4359   3
   3 -13   6 57.6018 24.6551   3
  -3  13  -6 9.86477 28.4639   4
   3 -13   6-1.46532 26.4956   2
   3 -13   7 249.591 33.9718   3
  -3  13  -7 270.264 46.7873   4
  -3  13  -7 192.548 32.1524   5
   3 -13   7 215.244 41.0113   2
   3 -13   8 367.888 49.3135   2
  -3  13  -8 370.627 43.1096   5
   3 -13   8 312.414 33.5995   3
  -3  13  -8 371.044 55.0945   4
  -3  13  -9 794.853 76.2068   4
   3 -13   9 838.893 75.5366   2
   3 -13   9 876.501 59.4079   3
  -3  13 -10 1174.65 91.6881   4
   3 -13  10 1147.85 88.3227   2
  -3  13 -11 104.087 42.8115   4
   3 -13  11 75.4475 38.4155   2
  -3  13 -12 6.04595 34.5210   4
   3 -13  12 86.6980 46.0876   2
  -3  13 -13 76.1968 47.2219   4
   3 -13  13 91.2465 40.3522   2
  -3  12  11 1541.24 110.904   6
   3 -12 -11 1402.55 110.902   1
  -3  12  10 304.271 56.8003   6
   3 -12 -10 260.992 60.2262   1
   3 -12  -9 3.06146 35.0359   1
  -3  12   9 30.0791 37.9976   6
   3 -12  -8 662.030 71.3324   1
  -3  12   8 766.522 77.7895   6
   3 -12  -7 1005.85 82.6110   1
  -3  12   7 1065.57 85.2360   6
  -3  12   6 681.312 70.1651   6
   3 -12  -6 662.425 68.0821   1
  -3  12   5 1551.71 98.8120   6
   3 -12  -5 1407.70 93.3414   1
  -3  12   4 861.100 73.3992   6
   3 -12  -4 832.883 72.8687   1
   3 -12  -3 1488.30 56.6477   2
  -3  12   3 1590.25 96.1498   6
   3 -12  -3 1571.15 92.3083   1
   3 -12  -2 2871.63 124.373   1
  -3  12   2 2944.86 124.852   6
   3 -12  -2 2857.23 85.0269   2
  -3  12   2 2860.79 86.6904   4
   3 -12  -1 107.175 22.5564   2
  -3  12   1 62.1254 22.3300   4
   3 -12  -1 92.4942 31.9789   1
  -3  12   1 91.3002 33.8211   6
  -3  12   0 267.836 34.4859   4
   3 -12   0 216.171 40.4016   1
  -3  12   0 258.416 44.1377   6
   3 -12   0 213.780 26.8170   2
  -3  12  -1 1723.61 78.5598   4
   3 -12   1 1845.59 78.1792   2
  -3  12  -1 1930.36 98.5117   6
   3 -12   1 1834.93 92.1603   1
  -3  12  -2 404.731 44.0461   4
  -3  12  -2 399.732 51.3352   6
   3 -12   2 381.953 40.0376   2
  -3  12  -3 233.221 36.5574   4
  -3  12  -3 228.868 41.4020   6
   3 -12   3 239.888 33.6206   2
   3 -12   4 994.085 65.5098   2
  -3  12  -4 889.482 65.4818   4
   3 -12   5 1041.87 69.1869   2
  -3  12  -5 928.730 70.6043   4
   3 -12   5 1082.96 66.1850   3
  -3  12  -6 357.204 48.5533   4
   3 -12   6 353.531 39.8107   3
   3 -12   6 293.359 43.9272   2
  -3  12  -6 337.429 38.9425   5
  -3  12  -7 963.665 74.4360   4
   3 -12   7 961.177 70.9547   2
   3 -12   7 937.474 56.7240   3
  -3  12  -7 961.979 58.8325   5
   3 -12   8 935.017 75.5996   2
  -3  12  -8 985.166 78.8496   4
   3 -12   8 921.474 59.1945   3
  -3  12  -8 1036.49 61.6282   5
  -3  12  -9 942.171 78.6166   4
   3 -12   9 915.530 57.4243   3
   3 -12   9 906.004 74.8619   2
  -3  12  -9 953.451 60.3287   5
  -3  12 -10 320.995 52.0805   4
   3 -12  10 369.560 39.6531   3
   3 -12  10 366.402 52.9897   2
  -3  12 -11 41.9056 34.3879   4
   3 -12  11 102.303 40.1759   2
  -3  12 -12 19.1427 34.5229   4
   3 -12  12-25.1541 33.8356   2
  -3  12 -13 169.159 49.2921   4
   3 -12  13 179.734 48.2788   2
  -3  12 -14 197.456 51.9212   4
   3 -12  14 230.392 55.7771   2
  -3  11  13-28.7774 37.5386   6
   3 -11 -12 64.9282 52.2809   1
  -3  11  12-2.88887 37.1988   6
   3 -11 -11 306.306 60.8429   1
  -3  11  11 262.170 53.1794   6
  -3  11  10 23.0631 29.2783   6
   3 -11 -10 45.8336 38.5159   1
   3 -11  -9 1217.85 91.2765   1
  -3  11   9 1348.33 95.2982   6
   3 -11  -8 1496.05 99.2166   1
  -3  11   8 1614.02 102.136   6
  -3  11   7 19.4961 30.1796   6
   3 -11  -7-11.0917 29.8694   1
  -3  11   6 3.58909 27.3745   6
   3 -11  -6-44.3346 33.4845   1
   3 -11  -5 329.275 47.5298   1
  -3  11   5 420.014 57.2356   6
  -3  11   4 483.993 59.0716   6
   3 -11  -4 452.549 59.0777   1
   3 -11  -4 365.067 26.8259   2
   3 -11  -3 1032.81 45.9474   2
  -3  11   3 1179.30 80.0264   6
  -3  11   3 1067.12 49.5085   4
   3 -11  -3 1122.50 76.9137   1
  -3  11   2 867.114 68.3890   6
   3 -11  -2 908.184 69.4263   1
   3 -11  -2 911.398 46.6202   2
  -3  11   2 796.851 45.7152   4
   3 -11  -1 2646.33 83.1261   2
   3 -11  -1 2709.46 110.350   1
  -3  11   1 2492.65 83.2553   4
  -3  11   1 2709.47 112.001   6
  -3  11   0 1090.73 72.8093   6
   3 -11   0 996.948 53.9386   2
  -3  11   0 1019.35 57.0360   4
   3 -11   0 1060.93 70.4914   1
  -3  11  -1 2053.05 97.1740   6
  -3  11  -1 1922.33 79.5528   4
   3 -11   1 1979.41 78.4022   2
   3 -11   2 221.429 32.2409   2
  -3  11  -2 213.111 34.3619   4
  -3  11  -2 137.895 34.7220   6
  -3  11  -3 223.338 39.5208   6
  -3  11  -3 238.024 36.1747   4
   3 -11   3 247.613 33.5665   2
  -3  11  -4 44.9369 26.1951   4
   3 -11   4 47.3069 24.2930   2
  -3  11  -5 14.6978 25.4742   4
   3 -11   5 14.0734 19.7740   2
   3 -11   5 83.5357 26.6564   3
  -3  11  -5 46.3903 21.8230   5
  -3  11  -6 467.025 54.1075   4
   3 -11   6 483.932 49.5847   2
   3 -11   6 508.969 41.2337   3
  -3  11  -6 568.319 44.4935   5
  -3  11  -7 2012.08 103.679   4
   3 -11   7 1990.51 100.279   2
   3 -11   7 2115.38 79.1698   3
  -3  11  -7 2112.66 80.7775   5
   3 -11   8 1828.32 75.0297   3
   3 -11   8 1744.12 94.5142   2
  -3  11  -8 1834.62 76.0024   5
  -3  11  -8 1700.17 98.0637   4
  -3  11  -9 1371.51 90.7681   4
   3 -11   9 1334.17 65.2089   3
   3 -11   9 1318.66 86.3128   2
  -3  11  -9 1384.99 67.9867   5
  -3  11 -10 1780.86 106.525   4
   3 -11  10 1758.56 75.4669   3
   3 -11  10 1765.25 101.141   2
  -3  11 -11 1284.71 94.3962   4
   3 -11  11 1328.54 90.4526   2
  -3  11 -12 117.745 41.8808   4
   3 -11  12 101.945 39.3314   2
  -3  11 -13 323.900 58.5300   4
   3 -11  13 316.781 57.6354   2
  -3  11 -14 1475.03 108.101   4
   3 -11  14 1467.59 104.296   2
   3 -11  15 366.708 63.3098   2
  -3  11 -15 364.953 63.1379   4
  -3  10  14 5.10809 31.7230   6
   3 -10 -14 138.583 66.7092   1
  -3  10  13 25.4356 36.5950   6
   3 -10 -13 3.04613 47.2366   1
  -3  10  12-30.1154 36.8979   6
   3 -10 -12-16.0206 39.0477   1
  -3  10  11 200.541 46.1810   6
   3 -10 -11 206.758 50.9264   1
  -3  10  10 68.3823 36.7622   6
   3 -10 -10 138.268 43.0158   1
   3 -10  -9 111.586 35.7499   1
  -3  10   9 75.6969 36.0328   6
   3 -10  -8 1049.10 80.6932   1
  -3  10   8 1156.56 84.3764   6
   3 -10  -7 3.16096 29.9851   1
  -3  10   7-15.1638 30.2944   6
   3 -10  -6 449.063 54.6023   1
  -3  10   6 510.270 56.9626   6
   3 -10  -5 165.760 17.0556   2
   3 -10  -5 200.465 40.6470   1
  -3  10   5 208.660 40.0109   6
  -3  10   4 1463.26 50.1963   4
   3 -10  -4 1416.04 49.2885   2
  -3  10   4 1617.34 88.5068   6
   3 -10  -4 1446.04 82.3945   1
   3 -10  -3 873.596 64.9348   1
  -3  10   3 786.522 41.3078   4
   3 -10  -3 752.068 38.5634   2
  -3  10   3 844.438 66.3248   6
   3 -10  -3 752.479 38.7376   4
   3 -10  -2 40.6512 25.1906   1
  -3  10   2 58.2908 19.8184   4
  -3  10   2 57.9769 28.7541   6
   3 -10  -2 52.2389 14.9378   2
  -3  10   1 2879.44 84.8251   4
   3 -10  -1 3108.63 86.0712   2
   3 -10  -1 2936.52 109.672   1
  -3  10   1 3166.05 114.761   6
  -3  10   0 2340.13 80.9466   4
  -3  10   0 2399.54 100.485   6
   3 -10   0 2396.80 79.3316   2
  -3  10  -1 227.109 31.6077   4
  -3  10  -1 206.200 35.1719   6
   3 -10   1 210.649 27.0023   2
  -3  10  -2 197.199 33.4313   4
   3 -10   2 176.592 29.1514   2
  -3  10  -2 174.827 37.0189   6
   3 -10   3 278.648 37.3781   2
  -3  10  -3 247.046 41.9663   6
  -3  10  -3 265.345 38.5033   4
  -3  10  -4 892.194 60.2956   4
   3 -10   4 869.863 57.8795   2
  -3  10  -5 1976.58 90.6122   4
   3 -10   5 2044.44 89.1251   2
   3 -10   5 2033.79 74.8663   3
  -3  10  -5 2062.45 74.2857   5
  -3  10  -6 759.614 61.8632   4
   3 -10   6 780.447 47.0633   3
   3 -10   6 792.785 60.1441   2
  -3  10  -6 798.920 47.9202   5
  -3  10  -7 620.253 56.9215   4
   3 -10   7 501.524 39.1069   3
   3 -10   7 629.311 58.7327   2
  -3  10  -7 628.969 42.9201   5
  -3  10  -8 935.995 72.1125   4
   3 -10   8 986.726 69.6434   2
  -3  10  -8 1022.32 54.5977   5
   3 -10   8 1031.72 53.2528   3
  -3  10  -9 332.347 48.0497   4
   3 -10   9 299.641 30.2049   3
  -3  10  -9 336.717 34.7672   5
   3 -10   9 317.586 46.8342   2
  -3  10 -10 31.5613 32.7376   4
   3 -10  10 34.1113 31.5389   2
   3 -10  10 10.9410 15.7577   3
  -3  10 -10 3.56301 19.0994   5
   3 -10  11 336.848 49.0611   2
  -3  10 -11 355.044 54.3986   4
   3 -10  11 183.134 20.6776   3
  -3  10 -12 924.180 81.3105   4
   3 -10  12 856.623 77.5881   2
  -3  10 -13 280.219 52.9762   4
   3 -10  13 338.785 53.8032   2
  -3  10 -14 44.1130 39.4944   4
   3 -10  14 71.5043 39.6693   2
  -3  10 -15 1134.13 99.2121   4
   3 -10  15 1171.44 96.3178   2
  -3  10 -16 549.308 72.6723   4
   3 -10  16 419.378 67.5250   2
  -3   9  15 406.456 65.1683   6
   3  -9 -15 244.233 68.6374   1
   3  -9 -14-24.6553 53.4234   1
  -3   9  14 86.7488 44.4804   6
  -3   9  13 29.5653 36.5345   6
   3  -9 -13 25.4434 38.3560   1
  -3   9  12 236.232 46.7048   6
   3  -9 -12 111.765 43.6631   1
  -3   9  11 155.372 42.6567   6
   3  -9 -11 153.348 42.7377   1
   3  -9 -10 744.564 71.4151   1
  -3   9  10 795.613 72.2083   6
   3  -9  -9 943.793 75.7701   1
  -3   9   9 1058.56 79.7184   6
  -3   9   8 133.938 37.1467   6
   3  -9  -8 108.407 34.3140   1
  -3   9   7 63.6821 30.4271   6
   3  -9  -7-0.75809 28.5634   1
   3  -9  -6 53.0813 10.6495   2
   3  -9  -6 65.9585 30.7002   1
  -3   9   6 38.2218 9.67677   4
  -3   9   6 72.6569 28.4046   6
   3  -9  -5 134.792 16.2469   2
  -3   9   5 151.210 16.7012   4
   3  -9  -5 146.239 36.6264   1
  -3   9   5 173.234 36.7336   6
  -3   9   4 728.201 35.1111   4
   3  -9  -4 689.451 33.8380   2
  -3   9   4 733.518 59.3709   6
   3  -9  -4 745.849 59.5603   1
  -3   9   3 37.5053 24.5505   6
   3  -9  -3 33.3921 25.9571   1
   3  -9  -3 4.10657 10.5613   2
  -3   9   3 35.5692 15.0161   4
   3  -9  -3 9.98589 10.7548   4
  -3   9   2 290.902 27.5681   4
   3  -9  -2 276.166 39.0313   1
   3  -9  -2 290.996 26.8411   2
  -3   9   2 300.901 41.0283   6
  -3   9   1 1050.24 49.9955   4
   3  -9  -1 1069.48 49.3117   2
  -3   9   1 1049.57 65.7825   6
  -3   9   0 660.024 42.4217   4
  -3   9   0 603.772 50.5639   6
   3  -9   0 641.471 41.2452   2
  -3   9  -1 288.872 39.4817   6
  -3   9  -1 289.941 32.6904   4
   3  -9   1 329.158 32.6530   2
  -3   9  -2 141.838 25.8736   4
  -3   9  -2 127.915 29.1210   6
   3  -9   2 132.627 25.6176   2
  -3   9  -3 132.112 28.2172   4
   3  -9   3 178.256 28.6739   2
  -3   9  -4 474.224 46.4512   4
   3  -9   4 513.905 43.4356   2
  -3   9  -5 815.431 58.5750   4
   3  -9   5 876.652 46.3738   3
   3  -9   5 764.917 55.5693   2
  -3   9  -5 756.460 42.5477   5
  -3   9  -6 472.955 49.8645   4
   3  -9   6 459.553 32.8753   3
  -3   9  -6 498.232 35.9476   5
   3  -9   6 468.417 47.7674   2
  -3   9  -7 297.166 40.0305   4
   3  -9   7 369.512 31.0852   3
   3  -9   7 357.077 45.9294   2
  -3   9  -7 362.572 32.4617   5
  -3   9  -8 240.871 40.4987   4
   3  -9   8 261.063 26.5411   3
  -3   9  -8 268.421 28.8285   5
   3  -9   8 285.246 42.6178   2
   3  -9   9 1176.16 54.0341   3
  -3   9  -9 1162.67 80.5594   4
  -3   9  -9 1245.26 57.5378   5
   3  -9   9 1200.24 76.3545   2
  -3   9 -10 148.482 37.0357   4
  -3   9 -10 155.020 24.4884   5
   3  -9  10 71.0613 21.0486   3
   3  -9  10 157.067 35.7097   2
  -3   9 -11 950.211 79.7156   4
   3  -9  11 862.157 51.0597   3
  -3   9 -11 1047.11 56.6213   5
   3  -9  11 942.443 75.4266   2
  -3   9 -12 460.289 57.6425   4
   3  -9  12 495.827 43.3474   3
   3  -9  12 468.344 61.0518   2
  -3   9 -13 75.6459 35.9340   4
   3  -9  13 101.340 38.7588   2
  -3   9 -14 17.0890 34.2205   4
   3  -9  14 0.20615 33.0254   2
  -3   9 -15 580.581 70.9674   4
   3  -9  15 481.005 64.8318   2
   3  -9  16 1062.78 94.9241   2
  -3   9 -16 1206.36 99.5188   4
  -3   9 -17 127.347 48.8387   4
   3  -8 -16 236.509 67.2949   1
  -3   8  16 503.561 68.0593   6
   3  -8 -15 219.039 54.3966   1
  -3   8  15 365.687 59.5508   6
  -3   8  14 730.284 77.7092   6
   3  -8 -14 693.877 76.5686   1
   3  -8 -13 1171.55 92.9721   1
  -3   8  13 1307.01 92.8094   6
  -3   8  12 1616.80 102.444   6
   3  -8 -12 1675.84 101.810   1
  -3   8  11 4266.88 154.912   6
   3  -8 -11 3996.49 147.524   1
  -3   8  10 4533.19 153.504   6
   3  -8 -10 4233.48 148.498   1
   3  -8  -9 4498.38 147.112   1
  -3   8   9 4807.56 154.059   6
   3  -8  -8 2760.46 112.964   1
  -3   8   8 2956.48 119.219   6
  -3   8   7 1351.09 33.4470   4
  -3   8   7 1628.54 86.9310   6
   3  -8  -7 1472.05 82.0306   1
   3  -8  -6 369.413 46.4702   1
  -3   8   6 389.002 46.5927   6
  -3   8   6 363.473 21.0678   4
   3  -8  -6 371.825 21.9266   2
  -3   8   5 12.3831 10.9529   4
   3  -8  -5 68.6846 14.0642   2
  -3   8   5 31.1019 26.2371   6
   3  -8  -5 8.70061 22.5862   1
   3  -8  -4-12.4927 12.0606   2
   3  -8  -4 20.4297 23.5498   1
  -3   8   4 19.7753 12.2697   4
  -3   8   4 11.1046 21.9456   6
  -3   8   3 221.753 22.6768   4
   3  -8  -3 185.221 18.9489   2
  -3   8   3 204.784 34.8263   6
   3  -8  -3 201.962 19.6246   4
   3  -8  -3 211.906 36.1696   1
   3  -8  -2 5671.87 138.973   1
  -3   8   2 5811.67 103.167   4
   3  -8  -2 5816.94 104.773   2
  -3   8   2 5769.61 142.808   6
   3  -8  -2 5932.26 105.066   4
  -3   8   1 8227.20 131.690   4
  -3   8   1 8163.31 163.990   6
   3  -8  -1 8557.16 133.004   2
  -3   8   0 10532.3 154.382   4
   3  -8   0 10410.3 153.117   2
  -3   8   0 10348.2 183.938   6
  -3   8  -1 15417.6 196.969   4
   3  -8   1 15823.5 196.865   2
  -3   8  -1 15556.7 224.198   6
   3  -8   2 3179.88 93.8646   2
  -3   8  -2 3226.44 95.5103   4
  -3   8  -2 2977.92 100.463   6
  -3   8  -3 1415.76 67.4676   4
   3  -8   3 1463.78 69.5180   2
   3  -8   3 1492.61 56.2697   5
  -3   8  -4 3465.38 107.107   4
   3  -8   4 3662.94 109.514   2
   3  -8   4 3823.85 84.3516   5
   3  -8   4 3995.60 86.7524   3
  -3   8  -4 3739.54 83.7291   5
  -3   8  -5 333.914 27.2810   5
  -3   8  -5 282.166 37.1075   4
   3  -8   5 337.952 39.2589   2
   3  -8   5 360.672 28.4045   5
   3  -8   5 328.006 27.1242   3
  -3   8  -6 56.3237 26.8216   4
   3  -8   6 18.9378 13.3968   5
   3  -8   6 79.7655 17.4785   3
   3  -8   6 67.0510 29.2601   2
  -3   8  -6 33.0687 14.0076   5
  -3   8  -7 1658.16 84.1979   4
   3  -8   7 1611.32 55.5214   3
   3  -8   7 1613.75 55.7147   5
   3  -8   7 1627.81 81.3924   2
  -3   8  -7 1688.86 58.9029   5
   3  -8   8 2787.03 74.4209   3
  -3   8  -8 2821.08 111.254   4
   3  -8   8 2569.40 105.562   2
  -3   8  -8 2790.82 76.6697   5
   3  -8   9 2170.35 102.339   2
  -3   8  -9 2445.98 107.532   4
   3  -8   9 2195.09 69.4534   3
  -3   8  -9 2431.67 74.9860   5
   3  -8  10 818.582 45.3653   3
  -3   8 -10 956.770 50.7000   5
  -3   8 -10 965.145 73.6506   4
   3  -8  10 880.983 69.8039   2
  -3   8 -11 1807.46 100.622   4
   3  -8  11 1685.32 69.1323   3
   3  -8  11 1611.69 93.8714   2
  -3   8 -11 1834.18 71.0847   5
  -3   8 -12 425.533 56.2100   4
   3  -8  12 549.685 45.6436   3
   3  -8  12 509.048 58.5617   2
  -3   8 -13 281.739 50.6443   4
   3  -8  13 322.823 50.3236   2
  -3   8 -14 2301.79 125.158   4
   3  -8  14 2129.36 116.118   2
  -3   8 -15 45.0333 38.1385   4
   3  -8  15-17.9852 33.6194   2
  -3   8 -16 84.4685 43.9375   4
   3  -8  16 133.381 50.9959   2
  -3   8 -17 389.301 63.8920   4
   3  -8  17 392.752 74.7097   2
  -3   7  17 303.475 52.3350   6
   3  -7 -17 21.1526 68.8185   1
   3  -7 -16-49.0930 55.3879   1
  -3   7  16 102.231 44.3542   6
  -3   7  15 125.538 39.2629   6
   3  -7 -15 21.0626 49.8845   1
   3  -7 -14 8.80464 37.7675   1
  -3   7  14 47.3284 35.0763   6
   3  -7 -13 139.582 45.2443   1
  -3   7  13 136.521 39.7657   6
  -3   7  12 162.079 40.6888   6
   3  -7 -12 133.388 39.0490   1
  -3   7  11 55.0985 30.4712   6
   3  -7 -11 38.9868 29.4555   1
   3  -7 -10 559.163 55.0595   1
  -3   7  10 564.868 58.1376   6
   3  -7  -9 114.746 32.3615   1
  -3   7   9 129.609 33.4849   6
  -3   7   8 203.104 15.2638   4
   3  -7  -8 229.203 39.2665   1
  -3   7   8 197.010 35.4309   6
  -3   7   7 39.5502 9.41299   4
  -3   7   7 32.6827 9.12033   2
  -3   7   7 65.4361 25.2121   6
   3  -7  -7 63.4214 29.2897   1
  -3   7   6 93.9303 13.1334   4
   3  -7  -6 117.637 15.3819   2
   3  -7  -6 106.589 28.7307   1
  -3   7   6 111.307 30.2896   6
  -3   7   6 104.031 14.2294   2
   3  -7  -5 317.248 21.9106   2
  -3   7   5 367.466 23.1910   4
  -3   7   5 391.987 42.9489   6
  -3   7   5 382.631 23.4994   2
   3  -7  -5 372.189 41.6739   1
  -3   7   4 12.5720 11.4175   4
   3  -7  -4 23.1969 22.4830   1
   3  -7  -4-3.76415 9.61682   2
  -3   7   4 15.4795 19.6578   6
  -3   7   4 13.0135 10.9479   2
  -3   7   3 460.307 28.8764   4
   3  -7  -3 391.862 25.8322   2
  -3   7   3 450.745 43.4640   6
   3  -7  -3 470.154 42.6636   1
  -3   7   3 475.857 29.3239   2
   3  -7  -3 437.343 27.8983   4
  -3   7   2 1211.96 46.6777   2
  -3   7   2 1222.41 47.5340   4
  -3   7   2 1250.81 64.1082   6
   3  -7  -2 1203.27 46.5880   4
   3  -7  -2 1227.58 47.2246   2
  -3   7   1 2691.73 90.5180   6
  -3   7   1 2731.38 72.2869   4
  -3   7   1 2692.73 71.4627   2
   3  -7  -1 2694.55 72.4907   2
   3  -7  -1 2722.91 73.3109   4
  -3   7   0 825.084 44.6940   4
   3  -7   0 776.892 42.0567   2
   3  -7   0 842.630 42.2769   5
  -3   7   0 831.673 54.0878   6
  -3   7  -1 1935.78 68.3013   4
  -3   7  -1 2048.44 78.7946   6
   3  -7   1 1993.29 68.3864   2
   3  -7   1 2087.34 62.3507   5
   3  -7   2 1626.50 64.9921   2
  -3   7  -2 1601.84 65.5526   4
   3  -7   2 1620.19 53.3592   5
  -3   7  -3 272.463 33.1128   4
   3  -7   3 243.587 31.9758   2
   3  -7   3 229.590 22.8495   5
   3  -7   4 687.202 34.1215   3
  -3   7  -4 623.766 46.5920   4
   3  -7   4 642.881 47.5524   2
   3  -7   4 719.804 34.8461   5
  -3   7  -4 637.702 32.7183   5
  -3   7  -5-1.74265 20.3656   4
   3  -7   5 6.48566 10.7512   5
   3  -7   5-1.78722 21.1638   2
   3  -7   5-27.5201 15.0593   3
  -3   7  -5 7.35383 11.6730   5
  -3   7  -6 667.241 53.7258   4
   3  -7   6 740.024 34.2561   5
   3  -7   6 738.872 34.3700   3
   3  -7   6 642.776 50.3610   2
  -3   7  -6 668.087 34.5724   5
  -3   7  -7 1054.92 67.0188   4
  -3   7  -7 1086.83 44.2123   5
   3  -7   7 1060.46 41.5561   3
   3  -7   7 1117.61 42.7767   5
   3  -7   7 986.985 62.5764   2
   3  -7   8 32.6799 9.53651   5
  -3   7  -8 63.8822 26.7682   4
   3  -7   8 15.7419 15.3379   3
  -3   7  -8 38.7160 15.1198   5
   3  -7   8 53.6894 25.5613   2
  -3   7  -9 1853.41 62.0996   5
  -3   7  -9 1844.48 91.9301   4
   3  -7   9 1715.38 59.1695   3
   3  -7   9 1737.02 86.3357   2
  -3   7 -10 1486.36 85.1746   4
   3  -7  10 1362.60 57.2622   3
   3  -7  10 1272.80 77.3045   2
  -3   7 -10 1414.57 57.6194   5
  -3   7 -11 163.526 40.1565   4
   3  -7  11 249.184 32.0095   3
   3  -7  11 164.696 38.4619   2
  -3   7 -11 148.816 23.9761   5
  -3   7 -12 137.248 38.1267   4
  -3   7 -12 112.628 23.7084   5
   3  -7  12 75.3829 22.3636   3
   3  -7  12 115.948 35.8937   2
   3  -7  13 288.198 36.1617   3
  -3   7 -13 257.496 49.3604   4
   3  -7  13 330.175 50.8094   2
  -3   7 -14 1813.94 110.574   4
   3  -7  14 1870.29 104.990   2
  -3   7 -15 487.276 62.1972   4
   3  -7  15 464.416 60.5267   2
  -3   7 -16 390.513 61.6268   4
   3  -7  16 267.752 54.3122   2
  -3   7 -17 552.795 70.4414   4
   3  -7  17 478.276 70.2825   2
  -3   7 -18 24.2755 39.8850   4
   3  -7  18 136.758 59.4745   2
   3  -7  19 43.1880 43.0300   6
   3  -6 -18 244.653 102.887   1
  -3   6  18 18.5203 34.8984   6
  -3   6  17 108.056 44.9102   6
   3  -6 -17 63.1932 62.0626   1
   3  -6 -16 111.311 51.8084   1
  -3   6  16 277.522 51.1119   6
   3  -6 -15-10.7757 46.9129   1
  -3   6  15 62.0156 36.1193   6
   3  -6 -14 26.1817 33.4047   1
  -3   6  14 118.950 40.5581   6
   3  -6 -13 200.287 40.1343   1
  -3   6  13 201.998 39.6445   6
  -3   6  12 0.63896 27.7471   6
   3  -6 -12 37.9700 31.3177   1
  -3   6  11 1954.69 100.040   6
   3  -6 -11 1849.03 96.0727   1
  -3   6  10 425.543 51.9575   6
   3  -6 -10 376.268 47.2598   1
   3  -6  -9 1038.90 67.1737   1
  -3   6   9 1188.68 70.9645   6
  -3   6   9 1046.87 36.5076   4
   3  -6  -8 3337.26 110.776   1
  -3   6   8 3572.07 116.509   6
  -3   6   8 3290.65 62.3561   2
  -3   6   8 3302.90 63.2062   4
   3  -6  -7 5650.92 139.892   1
  -3   6   7 5709.78 82.1401   2
  -3   6   7 5950.73 145.299   6
  -3   6   7 5725.93 82.4623   4
  -3   6   6 843.923 33.7623   2
   3  -6  -6 825.372 54.7737   1
  -3   6   6 871.201 34.7332   4
  -3   6   6 877.216 58.9846   6
   3  -6  -6 864.088 34.4770   2
  -3   6   5 3.98535 10.7393   4
   3  -6  -5-14.9699 12.0362   2
  -3   6   5 6.30981 10.4751   2
   3  -6  -5 6.86211 20.1185   1
  -3   6   5-2.17473 20.0479   6
  -3   6   4 3557.80 71.3246   4
   3  -6  -4 3491.76 101.340   1
  -3   6   4 3619.07 71.1784   2
   3  -6  -4 3640.23 73.2573   2
  -3   6   4 3660.13 105.938   6
  -3   6   3 563.009 31.7685   2
  -3   6   3 516.826 30.5035   4
   3  -6  -3 447.978 27.2001   2
  -3   6   3 542.411 43.6632   6
   3  -6  -3 487.920 40.3165   1
   3  -6  -2 50.3479 16.6539   4
  -3   6   2 75.5951 20.7063   4
  -3   6   2 72.1413 22.2331   2
  -3   6   2 57.4000 27.8872   6
   3  -6  -2 51.5832 18.4306   2
  -3   6   1 2120.68 67.5976   4
   3  -6  -1 2125.84 64.4676   2
  -3   6   1 2186.77 79.8805   6
  -3   6   1 2190.34 68.7137   2
   3  -6  -1 2127.51 66.1407   4
  -3   6   0 5067.74 100.157   4
   3  -6   0 4818.53 98.4904   2
  -3   6   0 4941.86 116.303   6
   3  -6   0 4949.78 89.9049   5
  -3   6  -1 12841.1 181.341   6
  -3   6  -1 12897.8 165.613   4
   3  -6   1 13115.7 165.359   2
   3  -6   1 12867.0 135.587   5
  -3   6  -2 16359.3 196.447   4
   3  -6   2 17780.2 150.106   5
   3  -6   2 17388.2 201.302   2
  -3   6  -3 6255.31 126.985   4
   3  -6   3 6440.12 127.975   2
   3  -6   3 6647.57 87.2841   5
  -3   6  -4 2872.20 90.5417   4
   3  -6   4 3041.82 91.8566   2
   3  -6   4 3008.31 57.1438   5
   3  -6   4 3012.37 57.5100   3
  -3   6  -4 2969.09 57.2523   5
  -3   6  -5 3484.39 104.634   4
   3  -6   5 3627.77 103.532   2
   3  -6   5 3798.57 64.9867   5
   3  -6   5 3811.47 65.0944   3
  -3   6  -5 3614.15 65.5359   5
   3  -6   6 208.340 16.8281   5
   3  -6   6 168.426 15.2896   3
  -3   6  -6 221.232 33.5753   4
  -3   6  -6 192.680 18.4444   5
   3  -6   6 192.888 30.2760   2
  -3   6  -7 1901.26 82.7703   4
   3  -6   7 1796.69 79.5623   2
  -3   6  -7 1893.81 52.8755   5
   3  -6   7 1763.47 49.1089   3
  -3   6  -8 1684.23 84.9046   4
  -3   6  -8 1794.51 54.9308   3
   3  -6   8 1653.36 53.1088   3
   3  -6   8 1607.98 81.2846   2
  -3   6  -8 1806.44 55.1633   5
  -3   6  -9-4.37512 22.4278   4
   3  -6   9 5.30145 24.7400   2
  -3   6  -9 6.03149 14.2364   5
  -3   6  -9 0.55499 14.3225   3
  -3   6 -10 11.0016 25.7021   4
  -3   6 -10 8.77468 14.4073   5
   3  -6  10-12.6534 24.6983   2
  -3   6 -11 2393.28 106.885   4
   3  -6  11 2270.96 104.479   2
  -3   6 -11 2310.87 75.2538   5
   3  -6  11 2330.17 77.1483   3
  -3   6 -12 5964.30 176.460   4
   3  -6  12 5772.41 164.863   2
   3  -6  12 5935.10 127.231   3
  -3   6 -12 5823.78 125.261   5
   3  -6  13 1687.34 73.1045   3
  -3   6 -13 1594.57 99.4516   4
  -3   6 -13 1679.17 72.3908   5
   3  -6  13 1656.78 95.7876   2
  -3   6 -14 1563.58 101.192   4
   3  -6  14 1647.27 76.0111   3
   3  -6  14 1560.13 96.2561   2
  -3   6 -15 1176.80 88.9723   4
   3  -6  15 1185.66 85.6346   2
  -3   6 -16 396.685 61.9155   4
   3  -6  16 382.254 57.7172   2
  -3   6 -17 309.952 54.9045   4
   3  -6  17 319.348 60.5379   2
  -3   6 -18 299.876 56.8542   4
   3  -6  18 253.617 65.8145   2
   3  -6  19 406.115 63.7820   6
  -3   5  19 35.3641 45.4860   6
  -3   5  18 500.343 65.8507   6
   3  -5 -18 853.875 108.689   1
  -3   5  17 265.812 50.0898   6
   3  -5 -17 237.239 64.4794   1
  -3   5  16 80.7116 36.6244   6
   3  -5 -16-60.1210 48.9200   1
   3  -5 -15 63.1024 42.0400   1
  -3   5  15 115.038 37.2592   6
   3  -5 -14-142.391 46.7113   1
  -3   5  14 3.86520 24.9528   6
   3  -5 -13-167.016 58.6457   1
  -3   5  13 1.72182 28.9575   6
   3  -5 -12 70.6227 32.9467   1
  -3   5  12 64.1326 27.7493   6
  -3   5  11 142.007 32.9679   6
   3  -5 -11 129.241 33.8616   1
  -3   5  10 387.859 45.0506   6
   3  -5 -10 418.178 46.0034   1
   3  -5  -9 9.74164 22.1163   1
  -3   5   9 6.70626 10.9436   2
  -3   5   9 14.1808 22.9771   6
   3  -5  -8 113.010 27.0565   1
  -3   5   8 151.485 17.2937   2
  -3   5   8 167.007 30.2071   6
  -3   5   7 85.7319 16.0877   2
  -3   5   7 82.7322 29.6051   6
   3  -5  -7 99.4398 28.8460   1
  -3   5   7 72.4215 15.7214   4
  -3   5   6 258.612 34.2834   6
  -3   5   6 251.970 21.1061   2
   3  -5  -6 218.482 31.0562   1
   3  -5  -6 274.279 22.3801   2
  -3   5   6 257.985 21.7648   4
   3  -5  -5 1144.66 41.4179   2
  -3   5   5 1176.34 40.9112   2
  -3   5   5 1229.08 59.8100   6
   3  -5  -5 1122.22 57.3625   1
  -3   5   5 1147.60 40.9859   4
   3  -5  -4 2607.94 62.3681   2
  -3   5   4 2382.38 79.3896   6
  -3   5   4 2368.83 58.4397   2
   3  -5  -4 2250.14 76.9877   1
  -3   5   4 2324.14 58.1004   4
  -3   5   3 1077.60 41.0169   2
  -3   5   3 1060.67 53.8335   6
   3  -5  -3 926.793 37.9316   2
  -3   5   3 1035.13 40.9077   4
   3  -5  -2 903.661 39.5984   3
  -3   5   2 922.066 40.0201   4
   3  -5  -2 748.218 33.8846   2
  -3   5   2 926.982 39.7829   2
  -3   5   2 916.093 49.3417   6
   3  -5  -2 939.637 39.3592   4
   3  -5  -1 1.47985 11.2918   4
  -3   5   1 3.40794 14.7924   4
   3  -5  -1 2.32849 10.6300   3
  -3   5   1 8.06921 18.2111   6
   3  -5  -1 11.9879 12.5907   2
  -3   5   1 5.55467 15.1441   2
   3  -5   0 1054.79 45.5916   2
  -3   5   0 1052.13 46.5429   4
  -3   5   0 1037.40 50.5575   6
   3  -5   0 947.128 42.8520   4
  -3   5   0 1046.77 46.3804   2
  -3   5  -1 327.719 29.1640   4
   3  -5   1 287.042 24.4236   2
   3  -5   1 360.783 22.1746   5
  -3   5  -2-6.11130 16.9682   4
   3  -5   2 10.2070 19.2979   2
   3  -5   2-9.10236 10.0807   5
  -3   5  -3 2264.91 74.0550   4
   3  -5   3 2240.57 41.4120   5
   3  -5   3 2262.34 74.8738   2
   3  -5   3 2224.75 41.3380   3
   3  -5   4 108.894 13.1391   5
  -3   5  -4-0.83289 22.4723   4
   3  -5   4 85.2577 13.6781   3
   3  -5   4 9.41090 20.0326   2
  -3   5  -4 0.31636 7.85347   5
  -3   5  -5 1117.01 59.0706   4
  -3   5  -5 1138.98 32.0303   5
   3  -5   5 1148.81 58.2785   2
   3  -5   5 1116.70 30.5815   5
   3  -5   5 1088.81 29.9739   3
  -3   5  -6 1787.93 75.1028   4
   3  -5   6 1637.67 41.0979   3
   3  -5   6 1670.21 72.3003   2
  -3   5  -6 1771.14 43.0492   5
  -3   5  -7 4432.02 121.697   4
  -3   5  -7 4257.40 72.4015   5
   3  -5   7 4158.73 115.419   2
   3  -5   7 4523.10 76.1634   3
  -3   5  -7 4362.86 74.1171   3
  -3   5  -8 192.040 33.9639   4
   3  -5   8 255.647 23.8253   3
  -3   5  -8 218.337 21.3498   3
  -3   5  -8 202.426 20.3878   5
   3  -5   8 164.489 31.4500   2
   3  -5   9 512.874 33.5019   3
  -3   5  -9 493.426 48.5295   4
   3  -5   9 507.566 46.6050   2
  -3   5  -9 512.838 32.3070   3
  -3   5  -9 508.640 31.5665   5
  -3   5 -10 1201.20 75.0561   4
   3  -5  10 1194.23 51.4294   3
  -3   5 -10 1153.18 49.7570   5
   3  -5  10 1109.87 68.2200   2
   3  -5  11 3237.43 89.2929   3
   3  -5  11 3010.23 114.023   2
  -3   5 -11 3214.70 121.344   4
  -3   5 -11 3211.83 88.5671   5
   3  -5  12 1127.46 75.3783   2
   3  -5  12 1246.57 59.6617   3
  -3   5 -12 1162.80 78.7638   4
  -3   5 -12 1238.08 59.2649   5
  -3   5 -13 288.210 46.7011   4
   3  -5  13 261.949 33.9604   3
  -3   5 -13 198.932 29.7260   5
   3  -5  13 198.727 39.3434   2
   3  -5  14 237.191 42.7826   2
  -3   5 -14 145.827 40.1500   4
   3  -5  14 157.588 30.9187   3
   3  -5  15 233.661 45.4875   2
  -3   5 -15 245.929 45.8700   4
   3  -5  16 31.1385 39.4467   2
  -3   5 -16 19.4717 30.9564   4
  -3   5 -17-6.81829 35.2589   4
   3  -5  17 14.0809 39.9555   2
  -3   5 -18 35.9669 38.0348   4
   3  -5  18 80.8785 42.7394   6
   3  -5  18 144.243 56.9289   2
  -3   5 -19 340.437 58.6700   4
   3  -5  19 398.712 65.1355   6
   3  -5  19 329.965 76.9838   2
  -3   4  19 156.729 41.6803   6
  -3   4  18 42.5339 34.5106   6
  -3   4  17 104.410 35.1641   6
   3  -4 -17 180.579 57.8896   1
  -3   4  16 320.701 49.3787   6
   3  -4 -16 353.730 56.8461   1
  -3   4  15 83.1293 33.2935   6
   3  -4 -15 90.9210 41.1390   1
   3  -4 -14 19.2958 39.2456   1
  -3   4  14 249.161 40.4868   6
  -3   4  13 148.613 37.3012   3
   3  -4 -13 35.4866 32.4308   1
  -3   4  13 111.070 32.1547   6
  -3   4  12 467.557 55.4554   3
   3  -4 -12 489.002 50.2534   1
  -3   4  12 559.668 52.0630   6
  -3   4  11 51.3358 23.3320   6
  -3   4  11 39.8902 29.8531   3
   3  -4 -11 12.4590 22.1734   1
  -3   4  10 142.221 29.5941   6
  -3   4  10 125.551 19.4689   2
  -3   4  10 136.736 31.7552   3
   3  -4 -10 98.3746 28.4563   1
  -3   4   9 15.8379 13.0427   2
  -3   4   9 11.6711 20.8498   6
  -3   4   9 16.6301 23.2783   3
   3  -4  -9 40.1423 21.8347   1
  -3   4   8 16.5253 22.3746   3
   3  -4  -8 22.2587 19.3505   1
  -3   4   8 18.9186 12.6509   2
  -3   4   8 16.5434 18.4083   6
  -3   4   7 2660.13 64.4602   2
   3  -4  -7 2525.26 84.9111   1
  -3   4   7 2545.01 89.8775   3
  -3   4   7 2711.41 86.5573   6
  -3   4   6 542.650 30.2686   2
  -3   4   6 564.550 41.6845   3
  -3   4   6 574.243 41.8453   6
   3  -4  -6 548.318 40.3675   1
  -3   4   5 492.622 29.0515   2
  -3   4   5 516.268 38.0090   6
  -3   4   5 445.776 38.3935   3
   3  -4  -5 474.588 29.5398   2
   3  -4  -5 454.499 38.6046   1
   3  -4  -4 1331.23 45.0823   2
  -3   4   4 1314.74 44.0714   2
   3  -4  -4 1284.98 54.5399   1
[truncated: 541,615 more chars]
